# Supplementary material for: Truncated radial glia as a common precursor in the late corticogenesis of gyrencephalic mammals
Source: eLife. 2023 Nov 21;12:RP91406. doi: 10.7554/eLife.91406 (PMC10662950; doi:10.7554/eLife.91406)
Supplement: Supplementary file 1. — (A) Summary of statistics for each sequencing library aligned to our custom genome. (B) Summary of statistics for representative libraries aligned to MusPutFur 1.0 (NCBI) and our custom genome. (C) Metadata for each cell. (D) Cluster markers identified using ‘FindAllMarkers’ Seurat function and filtered by min.pct=0.25 and logfc.threshold=0.25. (E) Ratios of clusters in each sample. [file elife-91406-supp1.xlsx]

## Sheet: A. SeqSTATs
Sample name	Estimated.Number.of.Cells	Mean.Reads.per.Cell	Median.Genes.per.Cell	Number.of.Reads	Valid.Barcodes	Reads.Mapped.Confidently.to.Transcriptome	Reads.Mapped.Confidently.to.Exonic.Regions	Reads.Mapped.Confidently.to.Intronic.Regions	Reads.Mapped.Confidently.to.Intergenic.Regions	Reads.Mapped.Antisense.to.Gene	Sequencing.Saturation	Q30.Bases.in.Barcode	Q30.Bases.in.RNA.Read	Q30.Bases.in.Sample.Index	Q30.Bases.in.UMI	Fraction.Reads.in.Cells	Total.Genes.Detected	Median.UMI.Counts.per.Cell
E25	3495	49658	2619	173557523	0.981	0.603	0.63	0.184	0.031	0.092	0.683	0.973	0.876	0.966	0.976	0.926	18751	8338
E34_AG	3223	42716	1763	137673935	0.983	0.582	0.608	0.23	0.037	0.082	0.806	0.973	0.886	0.967	0.98	0.94	17886	3983
E34_T	2265	47465	2195	107508876	0.982	0.564	0.592	0.24	0.036	0.087	0.758	0.974	0.883	0.967	0.978	0.95	17838	5863
E40_AG	1103	51662	2233	56983319	0.981	0.53	0.556	0.268	0.039	0.072	0.696	0.978	0.86	0.97	0.978	0.773	17367	5747
E40_T	1581	68088	1368	107647502	0.979	0.51	0.537	0.313	0.04	0.071	0.894	0.976	0.88	0.967	0.976	0.95	17060	2739
P1_AG	2681	45034	1581	120738453	0.975	0.514	0.543	0.284	0.051	0.077	0.804	0.977	0.892	0.968	0.973	0.86	18324	3148
P1_T	3647	58287	1062	212575114	0.975	0.496	0.524	0.213	0.038	0.105	0.84	0.977	0.876	0.967	0.973	0.598	18417	1904
P5_AG	2431	47437	1517	115320578	0.972	0.589	0.614	0.224	0.04	0.075	0.807	0.977	0.865	0.958	0.978	0.814	19265	3469
P5_T	2928	49345	1111	144483631	0.973	0.607	0.638	0.149	0.032	0.11	0.656	0.977	0.848	0.97	0.978	0.286	18334	2172
P10_AG	3028	44426	1818	134522306	0.976	0.583	0.608	0.221	0.044	0.073	0.756	0.977	0.872	0.967	0.979	0.846	20622	4539
P10_T	3935	51462	799	202506773	0.976	0.561	0.585	0.105	0.024	0.129	0.779	0.98	0.872	0.973	0.977	0.317	18450	1428
Sequencing statistics data were generated by the Cell Ranger v.2.0.2 software of 10x Genomics using MusPutFur 2.60 (DDBJ DRA010274) as reference.

## Sheet: B. SeqSTATs_with_NCBI_REF
Sample name	Estimated.Number.of.Cells	Mean.Reads.per.Cell	Median.Genes.per.Cell	Number.of.Reads	Valid.Barcodes	Reads.Mapped.Confidently.to.Transcriptome	Reads.Mapped.Confidently.to.Exonic.Regions	Reads.Mapped.Confidently.to.Intronic.Regions	Reads.Mapped.Confidently.to.Intergenic.Regions	Reads.Mapped.Antisense.to.Gene	Sequencing.Saturation	Q30.Bases.in.Barcode	Q30.Bases.in.RNA.Read	Q30.Bases.in.Sample.Index	Q30.Bases.in.UMI	Fraction.Reads.in.Cells	Total.Genes.Detected	Median.UMI.Counts.per.Cell
E34_AG	3226	42676	953	137673935	0.983	0.307	0.356	0.205	0.323	0.015	0.8	0.961	0.871	-	0.974	0.942	14562	2153
E34_T	2260	47570	1182	107508876	0.982	0.299	0.346	0.209	0.326	0.014	0.755	0.962	0.868	-	0.972	0.952	14445	3096
E40_T	1576	68304	765	107647502	0.979	0.245	0.284	0.25	0.36	0.013	0.888	0.963	0.863	-	0.97	0.95	13683	1347
Statistics data were generated by the Cell Ranger v.5.0.1 software of 10x Genomics using MusPutFur 1.0 (GCF_000215625.1) as reference.

## Sheet: C. metadata
cell_id	orig.ident	nCount_RNA	nFeature_RNA	seurat_clusters	Subtype	Subtype.combined
E25_AAACCTGCAAGACACG-1	10XE25	8445	2805	19	F_earlyRG3	F_earlyRG
E25_AAACCTGCAGTTAACC-1	10XE25	8955	2790	9	F_earlyRG1	F_earlyRG
E25_AAACCTGCATGACATC-1	10XE25	3267	1445	9	F_earlyRG1	F_earlyRG
E25_AAACCTGGTACTTGAC-1	10XE25	9175	2688	9	F_earlyRG1	F_earlyRG
E25_AAACCTGGTATTCTCT-1	10XE25	10643	3045	17	F_earlyRG2	F_earlyRG
E25_AAACCTGGTCGCGGTT-1	10XE25	9649	2939	17	F_earlyRG2	F_earlyRG
E25_AAACCTGGTCTGGAGA-1	10XE25	3698	1422	11	F_Deep Layer	F_Deep Layer
E25_AAACCTGGTGCAACGA-1	10XE25	12313	3333	19	F_earlyRG3	F_earlyRG
E25_AAACCTGGTTATGTGC-1	10XE25	8750	2642	4	F_IPC2	F_IPC
E25_AAACCTGTCCTTTCGG-1	10XE25	7473	2875	14	F_Upper Layer3	F_Upper Layer
E25_AAACGGGAGATATGCA-1	10XE25	10255	3021	17	F_earlyRG2	F_earlyRG
E25_AAACGGGCAAAGGAAG-1	10XE25	11834	3167	17	F_earlyRG2	F_earlyRG
E25_AAACGGGCACGAGAGT-1	10XE25	15465	3954	11	F_Deep Layer	F_Deep Layer
E25_AAACGGGCAGCTCCGA-1	10XE25	9249	2576	11	F_Deep Layer	F_Deep Layer
E25_AAACGGGGTACGCTGC-1	10XE25	8247	2641	17	F_earlyRG2	F_earlyRG
E25_AAACGGGGTTGGTTTG-1	10XE25	11975	3235	17	F_earlyRG2	F_earlyRG
E25_AAACGGGTCCACGAAT-1	10XE25	3665	1515	9	F_earlyRG1	F_earlyRG
E25_AAACGGGTCTCGTTTA-1	10XE25	2753	1350	2	F_IPC1	F_IPC
E25_AAAGATGAGCGCTCCA-1	10XE25	7721	2367	9	F_earlyRG1	F_earlyRG
E25_AAAGATGAGCGGATCA-1	10XE25	2889	1234	9	F_earlyRG1	F_earlyRG
E25_AAAGATGAGGCTCATT-1	10XE25	5347	1996	19	F_earlyRG3	F_earlyRG
E25_AAAGATGCAATGGACG-1	10XE25	6380	2330	9	F_earlyRG1	F_earlyRG
E25_AAAGATGCACTGCCAG-1	10XE25	8509	2753	19	F_earlyRG3	F_earlyRG
E25_AAAGCAAAGAGGTAGA-1	10XE25	9207	2807	9	F_earlyRG1	F_earlyRG
E25_AAAGCAACACGAAATA-1	10XE25	10854	3148	17	F_earlyRG2	F_earlyRG
E25_AAAGCAACATTAGGCT-1	10XE25	16525	3937	19	F_earlyRG3	F_earlyRG
E25_AAAGCAAGTAGAGCTG-1	10XE25	11932	367	25	F_unknown	F_unknown
E25_AAAGCAAGTCCATCCT-1	10XE25	11400	3411	11	F_Deep Layer	F_Deep Layer
E25_AAAGCAATCCACTGGG-1	10XE25	9022	2587	9	F_earlyRG1	F_earlyRG
E25_AAAGTAGAGAGTAAGG-1	10XE25	2700	1195	9	F_earlyRG1	F_earlyRG
E25_AAAGTAGAGGTTACCT-1	10XE25	6911	2159	11	F_Deep Layer	F_Deep Layer
E25_AAAGTAGAGTGAAGTT-1	10XE25	9679	2886	9	F_earlyRG1	F_earlyRG
E25_AAAGTAGCAACACGCC-1	10XE25	8181	2530	9	F_earlyRG1	F_earlyRG
E25_AAAGTAGCACGGTTTA-1	10XE25	3305	1431	9	F_earlyRG1	F_earlyRG
E25_AAAGTAGCAGTCAGAG-1	10XE25	5080	1981	9	F_earlyRG1	F_earlyRG
E25_AAAGTAGCATGCGCAC-1	10XE25	11427	3211	17	F_earlyRG2	F_earlyRG
E25_AAATGCCAGATAGGAG-1	10XE25	8774	2791	19	F_earlyRG3	F_earlyRG
E25_AAATGCCAGCATCATC-1	10XE25	9391	2893	17	F_earlyRG2	F_earlyRG
E25_AAATGCCAGGCTAGGT-1	10XE25	11412	3137	17	F_earlyRG2	F_earlyRG
E25_AAATGCCCACAGCGTC-1	10XE25	12405	3297	11	F_Deep Layer	F_Deep Layer
E25_AAATGCCCAGGACGTA-1	10XE25	2706	1219	9	F_earlyRG1	F_earlyRG
E25_AAATGCCCAGTCCTTC-1	10XE25	8244	2627	17	F_earlyRG2	F_earlyRG
E25_AAATGCCGTACCGCTG-1	10XE25	7128	2148	11	F_Deep Layer	F_Deep Layer
E25_AAATGCCGTCAATACC-1	10XE25	9338	2845	4	F_IPC2	F_IPC
E25_AAATGCCGTCGGGTCT-1	10XE25	8601	2972	11	F_Deep Layer	F_Deep Layer
E25_AAATGCCGTTCAGACT-1	10XE25	8459	2604	11	F_Deep Layer	F_Deep Layer
E25_AAATGCCTCCTGCCAT-1	10XE25	10965	3303	19	F_earlyRG3	F_earlyRG
E25_AACACGTAGGAGCGAG-1	10XE25	7517	2669	11	F_Deep Layer	F_Deep Layer
E25_AACACGTAGGAGTAGA-1	10XE25	11688	3356	19	F_earlyRG3	F_earlyRG
E25_AACACGTAGTGTCCAT-1	10XE25	15192	4051	11	F_Deep Layer	F_Deep Layer
E25_AACACGTCACTTCGAA-1	10XE25	9344	2840	17	F_earlyRG2	F_earlyRG
E25_AACACGTCAGCGTCCA-1	10XE25	11507	3205	19	F_earlyRG3	F_earlyRG
E25_AACACGTGTTGATTCG-1	10XE25	7375	2382	9	F_earlyRG1	F_earlyRG
E25_AACACGTTCAGCAACT-1	10XE25	4611	1769	17	F_earlyRG2	F_earlyRG
E25_AACCATGAGCTTATCG-1	10XE25	6988	2299	9	F_earlyRG1	F_earlyRG
E25_AACCATGCACACCGAC-1	10XE25	2965	1333	9	F_earlyRG1	F_earlyRG
E25_AACCATGCACCCATGG-1	10XE25	8054	2538	9	F_earlyRG1	F_earlyRG
E25_AACCATGCAGGGTACA-1	10XE25	8690	2574	9	F_earlyRG1	F_earlyRG
E25_AACCATGCAGTATCTG-1	10XE25	2559	1152	11	F_Deep Layer	F_Deep Layer
E25_AACCATGTCCGCGGTA-1	10XE25	11374	3206	11	F_Deep Layer	F_Deep Layer
E25_AACCATGTCTCTTGAT-1	10XE25	5043	2037	3	F_ITN	F_ITN
E25_AACCGCGAGATCCCAT-1	10XE25	8277	2372	11	F_Deep Layer	F_Deep Layer
E25_AACCGCGAGTCAAGGC-1	10XE25	13656	3175	20	F_mural	F_mural
E25_AACCGCGCACGACTCG-1	10XE25	9073	2839	17	F_earlyRG2	F_earlyRG
E25_AACCGCGGTAAGAGGA-1	10XE25	7421	2185	9	F_earlyRG1	F_earlyRG
E25_AACCGCGGTATTCTCT-1	10XE25	12501	3387	17	F_earlyRG2	F_earlyRG
E25_AACCGCGTCATGTCTT-1	10XE25	7976	2455	9	F_earlyRG1	F_earlyRG
E25_AACCGCGTCTTGTACT-1	10XE25	8423	2564	9	F_earlyRG1	F_earlyRG
E25_AACGTTGAGCCAACAG-1	10XE25	6889	2266	11	F_Deep Layer	F_Deep Layer
E25_AACGTTGCAAGCTGGA-1	10XE25	12812	3317	17	F_earlyRG2	F_earlyRG
E25_AACGTTGCACTACAGT-1	10XE25	14016	3811	19	F_earlyRG3	F_earlyRG
E25_AACGTTGCATTTGCCC-1	10XE25	9500	2890	9	F_earlyRG1	F_earlyRG
E25_AACGTTGGTAACGTTC-1	10XE25	5399	2160	9	F_earlyRG1	F_earlyRG
E25_AACGTTGTCACTCTTA-1	10XE25	2963	1289	9	F_earlyRG1	F_earlyRG
E25_AACTCAGAGAGTGAGA-1	10XE25	19324	4540	11	F_Deep Layer	F_Deep Layer
E25_AACTCAGAGCACCGCT-1	10XE25	9008	2852	11	F_Deep Layer	F_Deep Layer
E25_AACTCAGAGCTAGCCC-1	10XE25	11225	3207	11	F_Deep Layer	F_Deep Layer
E25_AACTCAGAGCTGCAAG-1	10XE25	2672	1174	11	F_Deep Layer	F_Deep Layer
E25_AACTCAGCAGCGATCC-1	10XE25	10273	3083	17	F_earlyRG2	F_earlyRG
E25_AACTCAGCATGAAGTA-1	10XE25	4089	1725	11	F_Deep Layer	F_Deep Layer
E25_AACTCAGGTGCAGTAG-1	10XE25	8052	2516	9	F_earlyRG1	F_earlyRG
E25_AACTCCCAGCCTATGT-1	10XE25	9568	2991	19	F_earlyRG3	F_earlyRG
E25_AACTCCCGTCCTAGCG-1	10XE25	9346	2913	9	F_earlyRG1	F_earlyRG
E25_AACTCCCGTCGCGGTT-1	10XE25	11526	3202	9	F_earlyRG1	F_earlyRG
E25_AACTCCCGTTCTGGTA-1	10XE25	7420	2314	9	F_earlyRG1	F_earlyRG
E25_AACTCTTAGGCGTACA-1	10XE25	6125	2167	9	F_earlyRG1	F_earlyRG
E25_AACTCTTCAAGCGATG-1	10XE25	7348	2244	9	F_earlyRG1	F_earlyRG
E25_AACTCTTGTGGGTATG-1	10XE25	10456	3007	9	F_earlyRG1	F_earlyRG
E25_AACTCTTGTTACGACT-1	10XE25	9892	3141	17	F_earlyRG2	F_earlyRG
E25_AACTGGTAGACTAAGT-1	10XE25	7990	2630	9	F_earlyRG1	F_earlyRG
E25_AACTGGTAGGGAAACA-1	10XE25	4231	1557	9	F_earlyRG1	F_earlyRG
E25_AACTGGTAGGGTTTCT-1	10XE25	7856	2583	9	F_earlyRG1	F_earlyRG
E25_AACTGGTAGTACGACG-1	10XE25	12419	1560	25	F_unknown	F_unknown
E25_AACTGGTCACATTCGA-1	10XE25	3863	1617	9	F_earlyRG1	F_earlyRG
E25_AACTGGTCATAGACTC-1	10XE25	8559	2639	11	F_Deep Layer	F_Deep Layer
E25_AACTGGTGTCACAAGG-1	10XE25	8982	2695	9	F_earlyRG1	F_earlyRG
E25_AACTGGTGTTACGTCA-1	10XE25	6878	2603	11	F_Deep Layer	F_Deep Layer
E25_AACTGGTTCACCCGAG-1	10XE25	9485	2735	17	F_earlyRG2	F_earlyRG
E25_AACTGGTTCCACGTTC-1	10XE25	9495	2871	9	F_earlyRG1	F_earlyRG
E25_AACTGGTTCCATGAAC-1	10XE25	4521	1595	9	F_earlyRG1	F_earlyRG
E25_AACTGGTTCGGAGCAA-1	10XE25	8283	2696	9	F_earlyRG1	F_earlyRG
E25_AACTGGTTCTTGTATC-1	10XE25	9547	2996	17	F_earlyRG2	F_earlyRG
E25_AACTTTCAGCCACGTC-1	10XE25	6299	2354	19	F_earlyRG3	F_earlyRG
E25_AACTTTCGTACCGGCT-1	10XE25	11701	3287	17	F_earlyRG2	F_earlyRG
E25_AACTTTCTCTCTGCTG-1	10XE25	10265	2984	11	F_Deep Layer	F_Deep Layer
E25_AAGACCTAGTGAACAT-1	10XE25	8043	2683	11	F_Deep Layer	F_Deep Layer
E25_AAGACCTCAGCCTATA-1	10XE25	10828	3259	9	F_earlyRG1	F_earlyRG
E25_AAGACCTCAGGACCCT-1	10XE25	3146	1403	9	F_earlyRG1	F_earlyRG
E25_AAGACCTGTCGCGTGT-1	10XE25	4033	1708	9	F_earlyRG1	F_earlyRG
E25_AAGACCTGTTTGTTGG-1	10XE25	10016	2987	17	F_earlyRG2	F_earlyRG
E25_AAGACCTTCAGCCTAA-1	10XE25	9968	2757	9	F_earlyRG1	F_earlyRG
E25_AAGACCTTCGAACTGT-1	10XE25	5784	1919	9	F_earlyRG1	F_earlyRG
E25_AAGCCGCAGCGATGAC-1	10XE25	9347	2799	11	F_Deep Layer	F_Deep Layer
E25_AAGCCGCCACATCTTT-1	10XE25	2562	1222	14	F_Upper Layer3	F_Upper Layer
E25_AAGCCGCCAGCGTTCG-1	10XE25	10031	2704	9	F_earlyRG1	F_earlyRG
E25_AAGCCGCTCCAGGGCT-1	10XE25	6005	2088	17	F_earlyRG2	F_earlyRG
E25_AAGGAGCAGACCCACC-1	10XE25	11569	3376	4	F_IPC2	F_IPC
E25_AAGGAGCAGCGTAATA-1	10XE25	10505	3232	19	F_earlyRG3	F_earlyRG
E25_AAGGAGCAGTGTGAAT-1	10XE25	9863	2946	11	F_Deep Layer	F_Deep Layer
E25_AAGGAGCCACCGAATT-1	10XE25	11199	3155	17	F_earlyRG2	F_earlyRG
E25_AAGGAGCCACCTCGTT-1	10XE25	6964	2499	19	F_earlyRG3	F_earlyRG
E25_AAGGAGCCAGATCCAT-1	10XE25	7572	2305	9	F_earlyRG1	F_earlyRG
E25_AAGGAGCCAGCTCGAC-1	10XE25	11904	3285	17	F_earlyRG2	F_earlyRG
E25_AAGGAGCGTACCAGTT-1	10XE25	9407	2913	11	F_Deep Layer	F_Deep Layer
E25_AAGGAGCGTCATGCAT-1	10XE25	11301	3233	11	F_Deep Layer	F_Deep Layer
E25_AAGGCAGAGCTGCCCA-1	10XE25	8845	2550	9	F_earlyRG1	F_earlyRG
E25_AAGGCAGAGGAATGGA-1	10XE25	6869	2447	9	F_earlyRG1	F_earlyRG
E25_AAGGCAGAGTAGGCCA-1	10XE25	4469	1793	17	F_earlyRG2	F_earlyRG
E25_AAGGCAGAGTGTACCT-1	10XE25	12029	3351	19	F_earlyRG3	F_earlyRG
E25_AAGGCAGCAAACGCGA-1	10XE25	7526	2487	9	F_earlyRG1	F_earlyRG
E25_AAGGCAGCAAGGTGTG-1	10XE25	6984	2307	11	F_Deep Layer	F_Deep Layer
E25_AAGGCAGCAGATAATG-1	10XE25	7653	2468	9	F_earlyRG1	F_earlyRG
E25_AAGGCAGCAGGGCATA-1	10XE25	7583	2538	17	F_earlyRG2	F_earlyRG
E25_AAGGCAGGTCTAGCGC-1	10XE25	10078	3071	11	F_Deep Layer	F_Deep Layer
E25_AAGGCAGGTGATGTGG-1	10XE25	7818	2527	19	F_earlyRG3	F_earlyRG
E25_AAGGCAGTCTTATCTG-1	10XE25	10031	2929	9	F_earlyRG1	F_earlyRG
E25_AAGGTTCAGCGATATA-1	10XE25	10146	2784	9	F_earlyRG1	F_earlyRG
E25_AAGGTTCAGGCAATTA-1	10XE25	8362	2556	11	F_Deep Layer	F_Deep Layer
E25_AAGGTTCAGTACGTTC-1	10XE25	3613	1484	9	F_earlyRG1	F_earlyRG
E25_AAGGTTCAGTTAGCGG-1	10XE25	7212	2326	11	F_Deep Layer	F_Deep Layer
E25_AAGGTTCCAGGACCCT-1	10XE25	9639	3177	11	F_Deep Layer	F_Deep Layer
E25_AAGGTTCGTACATCCA-1	10XE25	8550	2793	9	F_earlyRG1	F_earlyRG
E25_AAGGTTCGTCTCTTAT-1	10XE25	3332	1394	11	F_Deep Layer	F_Deep Layer
E25_AAGGTTCTCAATCTCT-1	10XE25	7601	2837	9	F_earlyRG1	F_earlyRG
E25_AAGTCTGAGACTGGGT-1	10XE25	3812	1470	11	F_Deep Layer	F_Deep Layer
E25_AAGTCTGAGAGTCTGG-1	10XE25	5083	2044	14	F_Upper Layer3	F_Upper Layer
E25_AAGTCTGAGCCACCTG-1	10XE25	10102	3069	17	F_earlyRG2	F_earlyRG
E25_AAGTCTGAGCGAAGGG-1	10XE25	8968	2800	11	F_Deep Layer	F_Deep Layer
E25_AAGTCTGCAACCGCCA-1	10XE25	4506	1798	11	F_Deep Layer	F_Deep Layer
E25_AAGTCTGCAATCCGAT-1	10XE25	7730	2373	9	F_earlyRG1	F_earlyRG
E25_AAGTCTGCAGTGAGTG-1	10XE25	9668	2861	17	F_earlyRG2	F_earlyRG
E25_AAGTCTGGTAAACACA-1	10XE25	5775	2226	17	F_earlyRG2	F_earlyRG
E25_AAGTCTGTCGTCCGTT-1	10XE25	6046	2196	9	F_earlyRG1	F_earlyRG
E25_AAGTCTGTCGTCTGAA-1	10XE25	3423	1454	9	F_earlyRG1	F_earlyRG
E25_AATCCAGAGCGCCTCA-1	10XE25	8221	2606	9	F_earlyRG1	F_earlyRG
E25_AATCCAGAGGTTCCTA-1	10XE25	8692	2623	9	F_earlyRG1	F_earlyRG
E25_AATCCAGAGTACGATA-1	10XE25	6697	2348	9	F_earlyRG1	F_earlyRG
E25_AATCCAGAGTACGCCC-1	10XE25	10629	2943	9	F_earlyRG1	F_earlyRG
E25_AATCCAGCAACTGGCC-1	10XE25	10596	3155	17	F_earlyRG2	F_earlyRG
E25_AATCCAGCATATACGC-1	10XE25	4122	1652	9	F_earlyRG1	F_earlyRG
E25_AATCCAGGTGTGTGCC-1	10XE25	8580	2743	9	F_earlyRG1	F_earlyRG
E25_AATCCAGGTTAAGACA-1	10XE25	11272	2979	17	F_earlyRG2	F_earlyRG
E25_AATCCAGGTTTAAGCC-1	10XE25	8880	2601	9	F_earlyRG1	F_earlyRG
E25_AATCCAGTCAGGCGAA-1	10XE25	8609	2714	11	F_Deep Layer	F_Deep Layer
E25_AATCGGTAGCCAGTAG-1	10XE25	10603	3021	17	F_earlyRG2	F_earlyRG
E25_AATCGGTAGGGAGTAA-1	10XE25	8437	2869	17	F_earlyRG2	F_earlyRG
E25_AATCGGTAGGGCTTGA-1	10XE25	3519	1393	11	F_Deep Layer	F_Deep Layer
E25_AATCGGTCAAGGACTG-1	10XE25	11756	3356	11	F_Deep Layer	F_Deep Layer
E25_AATCGGTCAGATCGGA-1	10XE25	5337	2126	14	F_Upper Layer3	F_Upper Layer
E25_AATCGGTGTAAGGGCT-1	10XE25	10144	3170	11	F_Deep Layer	F_Deep Layer
E25_AATCGGTGTAAGTGGC-1	10XE25	7373	2611	9	F_earlyRG1	F_earlyRG
E25_AATCGGTGTCCAACTA-1	10XE25	7184	2397	9	F_earlyRG1	F_earlyRG
E25_AATCGGTGTGACAAAT-1	10XE25	6243	2110	9	F_earlyRG1	F_earlyRG
E25_AATCGGTTCAAGGCTT-1	10XE25	10539	3096	17	F_earlyRG2	F_earlyRG
E25_AATCGGTTCGGACAAG-1	10XE25	7774	2160	11	F_Deep Layer	F_Deep Layer
E25_AATCGGTTCTACCTGC-1	10XE25	7253	2342	9	F_earlyRG1	F_earlyRG
E25_ACACCAAAGTCGATAA-1	10XE25	8936	2771	9	F_earlyRG1	F_earlyRG
E25_ACACCAAAGTGCCAGA-1	10XE25	15730	3792	19	F_earlyRG3	F_earlyRG
E25_ACACCAAAGTGGCACA-1	10XE25	5891	2062	4	F_IPC2	F_IPC
E25_ACACCAACACACCGCA-1	10XE25	7246	2267	9	F_earlyRG1	F_earlyRG
E25_ACACCAACAGTCAGAG-1	10XE25	13846	3647	19	F_earlyRG3	F_earlyRG
E25_ACACCAAGTCGAATCT-1	10XE25	8946	2751	11	F_Deep Layer	F_Deep Layer
E25_ACACCAAGTGGCCCTA-1	10XE25	3473	1448	11	F_Deep Layer	F_Deep Layer
E25_ACACCAATCCCAAGAT-1	10XE25	14023	3786	11	F_Deep Layer	F_Deep Layer
E25_ACACCCTAGCTAACAA-1	10XE25	8889	2723	11	F_Deep Layer	F_Deep Layer
E25_ACACCCTAGGCCCTCA-1	10XE25	18468	4482	19	F_earlyRG3	F_earlyRG
E25_ACACCCTCAAGCTGGA-1	10XE25	8682	2782	17	F_earlyRG2	F_earlyRG
E25_ACACCCTCAATGCCAT-1	10XE25	12069	3579	19	F_earlyRG3	F_earlyRG
E25_ACACCCTGTAGCTAAA-1	10XE25	19116	4868	19	F_earlyRG3	F_earlyRG
E25_ACACCCTGTCAGAAGC-1	10XE25	6089	2153	11	F_Deep Layer	F_Deep Layer
E25_ACACCGGCACCTCGTT-1	10XE25	11137	3166	19	F_earlyRG3	F_earlyRG
E25_ACACCGGCAGAAGCAC-1	10XE25	2357	1127	19	F_earlyRG3	F_earlyRG
E25_ACACCGGGTGCCTTGG-1	10XE25	9255	2943	11	F_Deep Layer	F_Deep Layer
E25_ACACCGGTCAGTGTTG-1	10XE25	10185	2967	9	F_earlyRG1	F_earlyRG
E25_ACACCGGTCCGCGTTT-1	10XE25	3237	1422	14	F_Upper Layer3	F_Upper Layer
E25_ACACCGGTCGCAAACT-1	10XE25	7212	2515	19	F_earlyRG3	F_earlyRG
E25_ACACTGAAGACAAGCC-1	10XE25	6297	2436	9	F_earlyRG1	F_earlyRG
E25_ACACTGAAGATGGGTC-1	10XE25	2383	1236	19	F_earlyRG3	F_earlyRG
E25_ACACTGAAGCACCGTC-1	10XE25	12647	3590	17	F_earlyRG2	F_earlyRG
E25_ACACTGACAAAGGTGC-1	10XE25	3984	1546	11	F_Deep Layer	F_Deep Layer
E25_ACACTGACAGCTCGCA-1	10XE25	11569	3293	17	F_earlyRG2	F_earlyRG
E25_ACACTGACAGTCGTGC-1	10XE25	8243	2726	19	F_earlyRG3	F_earlyRG
E25_ACACTGACATAGAAAC-1	10XE25	7089	2292	11	F_Deep Layer	F_Deep Layer
E25_ACACTGAGTCAGCTAT-1	10XE25	8080	2528	9	F_earlyRG1	F_earlyRG
E25_ACACTGAGTGTTCTTT-1	10XE25	7741	2476	9	F_earlyRG1	F_earlyRG
E25_ACACTGATCAAACGGG-1	10XE25	8520	2618	11	F_Deep Layer	F_Deep Layer
E25_ACACTGATCAGTGCAT-1	10XE25	8511	2592	9	F_earlyRG1	F_earlyRG
E25_ACAGCCGAGGCAAAGA-1	10XE25	11855	872	25	F_unknown	F_unknown
E25_ACAGCCGCATACAGCT-1	10XE25	6833	2451	9	F_earlyRG1	F_earlyRG
E25_ACAGCCGTCATTATCC-1	10XE25	8986	2818	9	F_earlyRG1	F_earlyRG
E25_ACAGCCGTCGCTAGCG-1	10XE25	2640	1111	11	F_Deep Layer	F_Deep Layer
E25_ACAGCCGTCTCGCTTG-1	10XE25	7962	2532	9	F_earlyRG1	F_earlyRG
E25_ACAGCTAAGCGATCCC-1	10XE25	11642	3202	17	F_earlyRG2	F_earlyRG
E25_ACAGCTAAGTAACCCT-1	10XE25	3074	1306	9	F_earlyRG1	F_earlyRG
E25_ACAGCTAAGTTGAGAT-1	10XE25	11079	3193	17	F_earlyRG2	F_earlyRG
E25_ACAGCTACAAACAACA-1	10XE25	9230	2821	4	F_IPC2	F_IPC
E25_ACAGCTACAGATAATG-1	10XE25	12461	3354	11	F_Deep Layer	F_Deep Layer
E25_ACAGCTAGTCTGCAAT-1	10XE25	8618	2764	17	F_earlyRG2	F_earlyRG
E25_ACAGCTATCAACACCA-1	10XE25	8891	2741	11	F_Deep Layer	F_Deep Layer
E25_ACAGCTATCATAAAGG-1	10XE25	9952	2933	17	F_earlyRG2	F_earlyRG
E25_ACATACGAGTACGCCC-1	10XE25	12799	3488	11	F_Deep Layer	F_Deep Layer
E25_ACATACGCAATGTAAG-1	10XE25	3882	1568	9	F_earlyRG1	F_earlyRG
E25_ACATACGGTGACTACT-1	10XE25	8133	2778	17	F_earlyRG2	F_earlyRG
E25_ACATACGTCCCGACTT-1	10XE25	6415	2239	11	F_Deep Layer	F_Deep Layer
E25_ACATCAGAGCGTCTAT-1	10XE25	5481	1988	9	F_earlyRG1	F_earlyRG
E25_ACATCAGAGGTGGGTT-1	10XE25	13511	3436	17	F_earlyRG2	F_earlyRG
E25_ACATCAGCACGAGGTA-1	10XE25	8346	2594	11	F_Deep Layer	F_Deep Layer
E25_ACATCAGCAGCATACT-1	10XE25	9101	2606	9	F_earlyRG1	F_earlyRG
E25_ACATCAGGTTGTGGCC-1	10XE25	7597	2612	9	F_earlyRG1	F_earlyRG
E25_ACATGGTAGAGAGCTC-1	10XE25	7774	2342	11	F_Deep Layer	F_Deep Layer
E25_ACATGGTCAGACGCAA-1	10XE25	2891	1276	9	F_earlyRG1	F_earlyRG
E25_ACATGGTCAGGAACGT-1	10XE25	9246	2741	17	F_earlyRG2	F_earlyRG
E25_ACATGGTCAGTTTACG-1	10XE25	7044	2443	4	F_IPC2	F_IPC
E25_ACATGGTGTGGACGAT-1	10XE25	5201	1972	9	F_earlyRG1	F_earlyRG
E25_ACCAGTAAGATACACA-1	10XE25	11677	3252	17	F_earlyRG2	F_earlyRG
E25_ACCAGTAAGGGTTCCC-1	10XE25	10750	3253	17	F_earlyRG2	F_earlyRG
E25_ACCAGTACATACCATG-1	10XE25	7347	2376	9	F_earlyRG1	F_earlyRG
E25_ACCAGTAGTAAGCACG-1	10XE25	11530	3181	9	F_earlyRG1	F_earlyRG
E25_ACCAGTAGTCCTAGCG-1	10XE25	9056	2776	11	F_Deep Layer	F_Deep Layer
E25_ACCAGTAGTCTAGCGC-1	10XE25	7349	2318	9	F_earlyRG1	F_earlyRG
E25_ACCAGTATCGAATCCA-1	10XE25	7312	2444	9	F_earlyRG1	F_earlyRG
E25_ACCAGTATCTGCAGTA-1	10XE25	2889	1191	9	F_earlyRG1	F_earlyRG
E25_ACCCACTCACCCATGG-1	10XE25	7637	2894	19	F_earlyRG3	F_earlyRG
E25_ACCCACTCAGTTAACC-1	10XE25	8216	2420	9	F_earlyRG1	F_earlyRG
E25_ACCCACTGTCAGAGGT-1	10XE25	7245	2553	14	F_Upper Layer3	F_Upper Layer
E25_ACCCACTTCCTTGGTC-1	10XE25	11096	3412	17	F_earlyRG2	F_earlyRG
E25_ACCCACTTCTTGAGGT-1	10XE25	10275	2923	9	F_earlyRG1	F_earlyRG
E25_ACCCACTTCTTGCATT-1	10XE25	6834	2184	9	F_earlyRG1	F_earlyRG
E25_ACCGTAAAGCAGATCG-1	10XE25	9565	2958	17	F_earlyRG2	F_earlyRG
E25_ACCGTAATCTACTCAT-1	10XE25	10380	3230	19	F_earlyRG3	F_earlyRG
E25_ACCTTTAGTCTGCAAT-1	10XE25	11974	3305	17	F_earlyRG2	F_earlyRG
E25_ACCTTTAGTTATGCGT-1	10XE25	12323	3329	24	F_Endothelial2	F_Endothelial
E25_ACCTTTATCAGAGCTT-1	10XE25	10423	3211	11	F_Deep Layer	F_Deep Layer
E25_ACCTTTATCAGTGCAT-1	10XE25	9164	2760	11	F_Deep Layer	F_Deep Layer
E25_ACCTTTATCCTTTACA-1	10XE25	13167	3679	9	F_earlyRG1	F_earlyRG
E25_ACCTTTATCGGAAACG-1	10XE25	9769	2764	17	F_earlyRG2	F_earlyRG
E25_ACGAGCCAGTGATCGG-1	10XE25	6920	2366	11	F_Deep Layer	F_Deep Layer
E25_ACGAGCCCAACAACCT-1	10XE25	3917	1636	17	F_earlyRG2	F_earlyRG
E25_ACGAGCCCACGGACAA-1	10XE25	3722	1529	9	F_earlyRG1	F_earlyRG
E25_ACGAGCCCAGCTGTAT-1	10XE25	3403	1403	9	F_earlyRG1	F_earlyRG
E25_ACGAGCCCATTGGCGC-1	10XE25	8926	2730	11	F_Deep Layer	F_Deep Layer
E25_ACGAGCCGTACGAAAT-1	10XE25	9227	2797	9	F_earlyRG1	F_earlyRG
E25_ACGAGCCTCGCATGGC-1	10XE25	7495	2227	9	F_earlyRG1	F_earlyRG
E25_ACGAGGAGTCGCTTTC-1	10XE25	10959	3175	11	F_Deep Layer	F_Deep Layer
E25_ACGATACAGATGTGTA-1	10XE25	8327	2549	9	F_earlyRG1	F_earlyRG
E25_ACGATACAGCTTCGCG-1	10XE25	6995	2470	11	F_Deep Layer	F_Deep Layer
E25_ACGATACCACTATCTT-1	10XE25	9481	2723	9	F_earlyRG1	F_earlyRG
E25_ACGATACCATCTCGCT-1	10XE25	9938	2966	17	F_earlyRG2	F_earlyRG
E25_ACGATACTCCATGAGT-1	10XE25	3860	1758	9	F_earlyRG1	F_earlyRG
E25_ACGATACTCTTTACGT-1	10XE25	6465	2239	19	F_earlyRG3	F_earlyRG
E25_ACGATGTAGCGTAGTG-1	10XE25	10883	3140	19	F_earlyRG3	F_earlyRG
E25_ACGATGTAGCTGATAA-1	10XE25	12347	3414	19	F_earlyRG3	F_earlyRG
E25_ACGATGTAGGAGTACC-1	10XE25	10009	3031	17	F_earlyRG2	F_earlyRG
E25_ACGATGTAGTGACTCT-1	10XE25	10364	3037	17	F_earlyRG2	F_earlyRG
E25_ACGATGTCAATAGAGT-1	10XE25	11468	3007	11	F_Deep Layer	F_Deep Layer
E25_ACGATGTGTAGGGACT-1	10XE25	9101	3071	17	F_earlyRG2	F_earlyRG
E25_ACGCAGCAGAGCCCAA-1	10XE25	8654	2773	11	F_Deep Layer	F_Deep Layer
E25_ACGCAGCCACAAGTAA-1	10XE25	5811	2299	19	F_earlyRG3	F_earlyRG
E25_ACGCAGCGTACGAAAT-1	10XE25	3184	1399	11	F_Deep Layer	F_Deep Layer
E25_ACGCAGCGTGTTCGAT-1	10XE25	10807	3160	17	F_earlyRG2	F_earlyRG
E25_ACGCAGCTCTCTGTCG-1	10XE25	8538	2697	9	F_earlyRG1	F_earlyRG
E25_ACGCCAGAGAAACCTA-1	10XE25	12312	3198	17	F_earlyRG2	F_earlyRG
E25_ACGCCAGAGCCAGAAC-1	10XE25	11787	3368	17	F_earlyRG2	F_earlyRG
E25_ACGCCAGAGGGATGGG-1	10XE25	9254	2836	17	F_earlyRG2	F_earlyRG
E25_ACGCCAGAGTCGCCGT-1	10XE25	10125	2907	9	F_earlyRG1	F_earlyRG
E25_ACGCCAGCACCTATCC-1	10XE25	3271	1523	19	F_earlyRG3	F_earlyRG
E25_ACGCCAGCATATACCG-1	10XE25	15528	3757	9	F_earlyRG1	F_earlyRG
E25_ACGCCAGCATGGTCAT-1	10XE25	2113	841	0	F_Upper Layer1	F_Upper Layer
E25_ACGCCAGTCGGATGTT-1	10XE25	9147	2654	9	F_earlyRG1	F_earlyRG
E25_ACGCCGAAGATCCCGC-1	10XE25	5932	2203	11	F_Deep Layer	F_Deep Layer
E25_ACGCCGAAGCTCCCAG-1	10XE25	4263	1613	9	F_earlyRG1	F_earlyRG
E25_ACGCCGACAGGAACGT-1	10XE25	3286	1417	9	F_earlyRG1	F_earlyRG
E25_ACGCCGAGTCTTGTCC-1	10XE25	9038	2704	11	F_Deep Layer	F_Deep Layer
E25_ACGCCGATCACTATTC-1	10XE25	11598	3252	11	F_Deep Layer	F_Deep Layer
E25_ACGCCGATCGGATGGA-1	10XE25	7305	2315	9	F_earlyRG1	F_earlyRG
E25_ACGGAGAAGATGGGTC-1	10XE25	11607	3215	17	F_earlyRG2	F_earlyRG
E25_ACGGAGAAGCAATATG-1	10XE25	7827	2530	9	F_earlyRG1	F_earlyRG
E25_ACGGAGACAGGCAGTA-1	10XE25	5836	2415	14	F_Upper Layer3	F_Upper Layer
E25_ACGGAGAGTCCGACGT-1	10XE25	10552	2870	9	F_earlyRG1	F_earlyRG
E25_ACGGAGATCATCTGTT-1	10XE25	9482	2864	11	F_Deep Layer	F_Deep Layer
E25_ACGGAGATCTTTACGT-1	10XE25	9845	2829	11	F_Deep Layer	F_Deep Layer
E25_ACGGCCAAGAGTAAGG-1	10XE25	11891	3283	17	F_earlyRG2	F_earlyRG
E25_ACGGCCAAGCGCTCCA-1	10XE25	11640	3022	11	F_Deep Layer	F_Deep Layer
E25_ACGGCCACAAACTGCT-1	10XE25	8682	2812	11	F_Deep Layer	F_Deep Layer
E25_ACGGCCAGTAGCTCCG-1	10XE25	5974	2148	9	F_earlyRG1	F_earlyRG
E25_ACGGGCTAGTACGACG-1	10XE25	3207	1370	11	F_Deep Layer	F_Deep Layer
E25_ACGGGCTCAGCGTTCG-1	10XE25	6060	2316	11	F_Deep Layer	F_Deep Layer
E25_ACGGGCTGTTCCTCCA-1	10XE25	7780	2413	11	F_Deep Layer	F_Deep Layer
E25_ACGGGCTTCACCGGGT-1	10XE25	7288	2549	19	F_earlyRG3	F_earlyRG
E25_ACGGGTCAGAAGGTTT-1	10XE25	6947	2254	11	F_Deep Layer	F_Deep Layer
E25_ACGGGTCAGAGCTATA-1	10XE25	8632	2546	11	F_Deep Layer	F_Deep Layer
E25_ACGGGTCCAAGACACG-1	10XE25	9985	2908	11	F_Deep Layer	F_Deep Layer
E25_ACGGGTCCACTGAAGG-1	10XE25	3181	1236	11	F_Deep Layer	F_Deep Layer
E25_ACGGGTCCATGCTGGC-1	10XE25	7566	2271	9	F_earlyRG1	F_earlyRG
E25_ACGGGTCGTTAGTGGG-1	10XE25	7715	2532	17	F_earlyRG2	F_earlyRG
E25_ACGGGTCTCAGTGCAT-1	10XE25	7876	2649	19	F_earlyRG3	F_earlyRG
E25_ACGTCAAAGAGTTGGC-1	10XE25	10750	3059	17	F_earlyRG2	F_earlyRG
E25_ACGTCAACACGAAGCA-1	10XE25	11453	3405	17	F_earlyRG2	F_earlyRG
E25_ACGTCAAGTAATCGTC-1	10XE25	9923	3241	14	F_Upper Layer3	F_Upper Layer
E25_ACGTCAATCAGAAATG-1	10XE25	6228	2367	9	F_earlyRG1	F_earlyRG
E25_ACGTCAATCTGATTCT-1	10XE25	11504	3199	11	F_Deep Layer	F_Deep Layer
E25_ACGTCAATCTTGTATC-1	10XE25	9805	2854	9	F_earlyRG1	F_earlyRG
E25_ACTATCTAGCAGGTCA-1	10XE25	7629	2388	11	F_Deep Layer	F_Deep Layer
E25_ACTATCTTCTTGGGTA-1	10XE25	7449	2249	11	F_Deep Layer	F_Deep Layer
E25_ACTGAACAGTGCCAGA-1	10XE25	8609	2686	17	F_earlyRG2	F_earlyRG
E25_ACTGAACCACTCAGGC-1	10XE25	3567	1574	19	F_earlyRG3	F_earlyRG
E25_ACTGAACGTCAGAATA-1	10XE25	10036	3132	11	F_Deep Layer	F_Deep Layer
E25_ACTGAACGTGCGAAAC-1	10XE25	16897	4314	11	F_Deep Layer	F_Deep Layer
E25_ACTGAACGTTGTTTGG-1	10XE25	6179	2282	11	F_Deep Layer	F_Deep Layer
E25_ACTGAACTCGCAAGCC-1	10XE25	11089	3033	19	F_earlyRG3	F_earlyRG
E25_ACTGAGTAGATGTTAG-1	10XE25	1979	1077	9	F_earlyRG1	F_earlyRG
E25_ACTGAGTAGCCTATGT-1	10XE25	8128	2560	17	F_earlyRG2	F_earlyRG
E25_ACTGAGTAGGGCTCTC-1	10XE25	5480	1932	9	F_earlyRG1	F_earlyRG
E25_ACTGAGTAGTCCTCCT-1	10XE25	10702	3349	19	F_earlyRG3	F_earlyRG
E25_ACTGAGTCAATTGCTG-1	10XE25	11497	3338	17	F_earlyRG2	F_earlyRG
E25_ACTGAGTCACATCCGG-1	10XE25	2792	1311	15	F_lateRG3	F_lateRG
E25_ACTGAGTCACCTCGTT-1	10XE25	8667	2676	9	F_earlyRG1	F_earlyRG
E25_ACTGAGTCAGATGAGC-1	10XE25	11299	3137	9	F_earlyRG1	F_earlyRG
E25_ACTGAGTGTGTGGCTC-1	10XE25	7806	2504	9	F_earlyRG1	F_earlyRG
E25_ACTGAGTGTTCGTTGA-1	10XE25	4090	1698	9	F_earlyRG1	F_earlyRG
E25_ACTGATGAGCATCATC-1	10XE25	8102	2456	11	F_Deep Layer	F_Deep Layer
E25_ACTGATGAGTGAAGTT-1	10XE25	2874	1349	11	F_Deep Layer	F_Deep Layer
E25_ACTGATGCAAGAGTCG-1	10XE25	8340	2496	9	F_earlyRG1	F_earlyRG
E25_ACTGATGCAAGTAGTA-1	10XE25	7513	2227	11	F_Deep Layer	F_Deep Layer
E25_ACTGATGCATCGGACC-1	10XE25	5222	2082	17	F_earlyRG2	F_earlyRG
E25_ACTGATGCATTGAGCT-1	10XE25	7330	2427	9	F_earlyRG1	F_earlyRG
E25_ACTGATGGTGAACCTT-1	10XE25	9974	3109	11	F_Deep Layer	F_Deep Layer
E25_ACTGATGGTTTGCATG-1	10XE25	14656	3745	19	F_earlyRG3	F_earlyRG
E25_ACTGATGTCCCTCTTT-1	10XE25	4338	1565	11	F_Deep Layer	F_Deep Layer
E25_ACTGATGTCGCAGGCT-1	10XE25	9190	2987	11	F_Deep Layer	F_Deep Layer
E25_ACTGATGTCTCGGACG-1	10XE25	7533	2475	9	F_earlyRG1	F_earlyRG
E25_ACTGATGTCTCTTGAT-1	10XE25	11720	3518	19	F_earlyRG3	F_earlyRG
E25_ACTGCTCAGAGACGAA-1	10XE25	13655	3530	11	F_Deep Layer	F_Deep Layer
E25_ACTGCTCAGTGGAGTC-1	10XE25	4440	1646	11	F_Deep Layer	F_Deep Layer
E25_ACTGCTCCAAGCGCTC-1	10XE25	8519	2590	9	F_earlyRG1	F_earlyRG
E25_ACTGCTCCAGGTCTCG-1	10XE25	10624	3168	19	F_earlyRG3	F_earlyRG
E25_ACTGCTCTCCAATGGT-1	10XE25	7629	2450	9	F_earlyRG1	F_earlyRG
E25_ACTGCTCTCTGCAGTA-1	10XE25	6415	2297	17	F_earlyRG2	F_earlyRG
E25_ACTGCTCTCTGGCGTG-1	10XE25	11127	3237	11	F_Deep Layer	F_Deep Layer
E25_ACTGTCCAGTACTTGC-1	10XE25	8300	2534	9	F_earlyRG1	F_earlyRG
E25_ACTGTCCAGTCCCACG-1	10XE25	7872	2481	9	F_earlyRG1	F_earlyRG
E25_ACTGTCCCAGATCGGA-1	10XE25	11823	3086	17	F_earlyRG2	F_earlyRG
E25_ACTGTCCCAGCCACCA-1	10XE25	10179	2890	17	F_earlyRG2	F_earlyRG
E25_ACTGTCCGTCAGATAA-1	10XE25	6290	2274	19	F_earlyRG3	F_earlyRG
E25_ACTGTCCTCAGTGTTG-1	10XE25	11910	3426	17	F_earlyRG2	F_earlyRG
E25_ACTGTCCTCGTCCAGG-1	10XE25	6975	2379	11	F_Deep Layer	F_Deep Layer
E25_ACTTACTAGACCTTTG-1	10XE25	7940	2476	11	F_Deep Layer	F_Deep Layer
E25_ACTTACTAGACTTTCG-1	10XE25	8520	2520	9	F_earlyRG1	F_earlyRG
E25_ACTTACTAGAGTAAGG-1	10XE25	3797	1554	9	F_earlyRG1	F_earlyRG
E25_ACTTACTAGCAGCGTA-1	10XE25	5330	2019	3	F_ITN	F_ITN
E25_ACTTACTAGGGCACTA-1	10XE25	11900	3483	11	F_Deep Layer	F_Deep Layer
E25_ACTTACTAGTACATGA-1	10XE25	8000	2546	11	F_Deep Layer	F_Deep Layer
E25_ACTTACTCAATCGGTT-1	10XE25	7684	2407	9	F_earlyRG1	F_earlyRG
E25_ACTTACTCACTTCGAA-1	10XE25	10161	3033	11	F_Deep Layer	F_Deep Layer
E25_ACTTACTCAGGTGCCT-1	10XE25	13645	3490	17	F_earlyRG2	F_earlyRG
E25_ACTTACTGTCACCTAA-1	10XE25	4255	1663	9	F_earlyRG1	F_earlyRG
E25_ACTTACTTCAACGCTA-1	10XE25	9321	2800	9	F_earlyRG1	F_earlyRG
E25_ACTTGTTCAGATCTGT-1	10XE25	6844	2330	9	F_earlyRG1	F_earlyRG
E25_ACTTGTTCATCTACGA-1	10XE25	7471	2395	11	F_Deep Layer	F_Deep Layer
E25_ACTTGTTGTACAGACG-1	10XE25	8258	2432	9	F_earlyRG1	F_earlyRG
E25_ACTTGTTGTCTAGCGC-1	10XE25	6739	2205	11	F_Deep Layer	F_Deep Layer
E25_ACTTGTTTCACAGTAC-1	10XE25	8274	2721	9	F_earlyRG1	F_earlyRG
E25_ACTTGTTTCAGTGTTG-1	10XE25	4378	1755	9	F_earlyRG1	F_earlyRG
E25_ACTTGTTTCCTGTAGA-1	10XE25	4029	1772	9	F_earlyRG1	F_earlyRG
E25_ACTTTCAAGATCTGCT-1	10XE25	18392	4415	11	F_Deep Layer	F_Deep Layer
E25_ACTTTCAAGCTTTGGT-1	10XE25	6457	2228	9	F_earlyRG1	F_earlyRG
E25_ACTTTCAAGGACAGCT-1	10XE25	7657	2438	9	F_earlyRG1	F_earlyRG
E25_ACTTTCAAGTAACCCT-1	10XE25	6740	2527	14	F_Upper Layer3	F_Upper Layer
E25_ACTTTCACACGACTCG-1	10XE25	7368	2506	9	F_earlyRG1	F_earlyRG
E25_ACTTTCACAGACGCAA-1	10XE25	11570	3309	19	F_earlyRG3	F_earlyRG
E25_ACTTTCACATGCCTAA-1	10XE25	7012	2306	17	F_earlyRG2	F_earlyRG
E25_ACTTTCAGTAGAAAGG-1	10XE25	7410	2384	9	F_earlyRG1	F_earlyRG
E25_ACTTTCAGTCGTTGTA-1	10XE25	11714	3255	17	F_earlyRG2	F_earlyRG
E25_ACTTTCAGTCTGGAGA-1	10XE25	6067	2238	9	F_earlyRG1	F_earlyRG
E25_AGAATAGAGGACCACA-1	10XE25	10695	3195	17	F_earlyRG2	F_earlyRG
E25_AGAATAGAGTCAAGGC-1	10XE25	7058	360	25	F_unknown	F_unknown
E25_AGAATAGAGTGGAGTC-1	10XE25	13484	3463	19	F_earlyRG3	F_earlyRG
E25_AGAATAGCAAAGCGGT-1	10XE25	14787	3907	11	F_Deep Layer	F_Deep Layer
E25_AGAATAGCATTTGCCC-1	10XE25	9285	2751	9	F_earlyRG1	F_earlyRG
E25_AGAATAGTCGTGGACC-1	10XE25	10817	3107	9	F_earlyRG1	F_earlyRG
E25_AGACGTTCACGACTCG-1	10XE25	3777	1529	17	F_earlyRG2	F_earlyRG
E25_AGACGTTGTACATCCA-1	10XE25	4076	1567	9	F_earlyRG1	F_earlyRG
E25_AGACGTTGTCATCCCT-1	10XE25	4449	1836	19	F_earlyRG3	F_earlyRG
E25_AGACGTTGTCTCTCGT-1	10XE25	14315	3460	17	F_earlyRG2	F_earlyRG
E25_AGACGTTGTCTTGATG-1	10XE25	12444	3353	17	F_earlyRG2	F_earlyRG
E25_AGACGTTGTGTCGCTG-1	10XE25	7970	2557	9	F_earlyRG1	F_earlyRG
E25_AGAGCGAAGCGTCTAT-1	10XE25	6645	2137	9	F_earlyRG1	F_earlyRG
E25_AGAGCGAAGTGAACGC-1	10XE25	7550	2485	9	F_earlyRG1	F_earlyRG
E25_AGAGCGACACTTAACG-1	10XE25	1874	858	19	F_earlyRG3	F_earlyRG
E25_AGAGCGACAGTGACAG-1	10XE25	9630	2935	11	F_Deep Layer	F_Deep Layer
E25_AGAGCGATCTTAACCT-1	10XE25	10485	3110	17	F_earlyRG2	F_earlyRG
E25_AGAGCTTCAAAGTGCG-1	10XE25	5482	2100	11	F_Deep Layer	F_Deep Layer
E25_AGAGCTTCAACTGCGC-1	10XE25	3749	1524	19	F_earlyRG3	F_earlyRG
E25_AGAGCTTCACGCTTTC-1	10XE25	3448	1467	11	F_Deep Layer	F_Deep Layer
E25_AGAGCTTCAGTGGAGT-1	10XE25	1872	921	11	F_Deep Layer	F_Deep Layer
E25_AGAGCTTCATCGATTG-1	10XE25	9410	2935	19	F_earlyRG3	F_earlyRG
E25_AGAGCTTCATGGATGG-1	10XE25	11846	324	25	F_unknown	F_unknown
E25_AGAGCTTGTAACGCGA-1	10XE25	3793	1577	9	F_earlyRG1	F_earlyRG
E25_AGAGCTTGTGGTCTCG-1	10XE25	8792	2658	9	F_earlyRG1	F_earlyRG
E25_AGAGCTTGTGTGCCTG-1	10XE25	12424	3338	19	F_earlyRG3	F_earlyRG
E25_AGAGCTTTCACCCTCA-1	10XE25	7928	2653	17	F_earlyRG2	F_earlyRG
E25_AGAGCTTTCAGCTGGC-1	10XE25	5218	1973	17	F_earlyRG2	F_earlyRG
E25_AGAGTGGAGATGGCGT-1	10XE25	8119	2504	9	F_earlyRG1	F_earlyRG
E25_AGAGTGGAGCAATCTC-1	10XE25	12806	3517	17	F_earlyRG2	F_earlyRG
E25_AGAGTGGAGTGTTAGA-1	10XE25	13126	3622	11	F_Deep Layer	F_Deep Layer
E25_AGAGTGGCATCGGGTC-1	10XE25	1985	900	9	F_earlyRG1	F_earlyRG
E25_AGAGTGGCATGCCACG-1	10XE25	8853	2532	9	F_earlyRG1	F_earlyRG
E25_AGAGTGGGTACAGTTC-1	10XE25	7771	2422	9	F_earlyRG1	F_earlyRG
E25_AGAGTGGGTCTAGGTT-1	10XE25	8144	2600	16	F_IPC3	F_IPC
E25_AGAGTGGTCACCGGGT-1	10XE25	5679	1984	9	F_earlyRG1	F_earlyRG
E25_AGATCTGAGCACCGTC-1	10XE25	7172	2210	9	F_earlyRG1	F_earlyRG
E25_AGATCTGCAAAGTCAA-1	10XE25	14165	3503	19	F_earlyRG3	F_earlyRG
E25_AGATCTGGTAGGCTGA-1	10XE25	7204	2390	9	F_earlyRG1	F_earlyRG
E25_AGATCTGGTCGAAAGC-1	10XE25	7078	2319	9	F_earlyRG1	F_earlyRG
E25_AGATCTGGTTGGAGGT-1	10XE25	9973	2985	9	F_earlyRG1	F_earlyRG
E25_AGATCTGGTTTGACAC-1	10XE25	2634	1232	16	F_IPC3	F_IPC
E25_AGATCTGTCCGCTGTT-1	10XE25	7686	2456	9	F_earlyRG1	F_earlyRG
E25_AGATCTGTCGTGGGAA-1	10XE25	8561	2791	4	F_IPC2	F_IPC
E25_AGATTGCAGCAACGGT-1	10XE25	11133	3379	17	F_earlyRG2	F_earlyRG
E25_AGATTGCAGCGCCTCA-1	10XE25	13381	3540	16	F_IPC3	F_IPC
E25_AGATTGCAGTGAAGTT-1	10XE25	9189	2829	11	F_Deep Layer	F_Deep Layer
E25_AGATTGCCATGAAGTA-1	10XE25	10884	3333	19	F_earlyRG3	F_earlyRG
E25_AGATTGCGTAACGACG-1	10XE25	9159	2754	9	F_earlyRG1	F_earlyRG
E25_AGATTGCGTACACCGC-1	10XE25	8916	3037	14	F_Upper Layer3	F_Upper Layer
E25_AGATTGCTCTTTCCTC-1	10XE25	9032	2722	9	F_earlyRG1	F_earlyRG
E25_AGCAGCCAGCAAATCA-1	10XE25	12421	3439	11	F_Deep Layer	F_Deep Layer
E25_AGCAGCCAGCAACGGT-1	10XE25	12165	3551	17	F_earlyRG2	F_earlyRG
E25_AGCAGCCAGTATCTCG-1	10XE25	12964	3539	17	F_earlyRG2	F_earlyRG
E25_AGCAGCCAGTGCAAGC-1	10XE25	10250	3014	17	F_earlyRG2	F_earlyRG
E25_AGCAGCCAGTGGTAGC-1	10XE25	7179	2429	9	F_earlyRG1	F_earlyRG
E25_AGCAGCCCAAATACAG-1	10XE25	7105	2671	19	F_earlyRG3	F_earlyRG
E25_AGCAGCCCAATGGTCT-1	10XE25	11655	3148	17	F_earlyRG2	F_earlyRG
E25_AGCAGCCGTACTTAGC-1	10XE25	5717	2052	11	F_Deep Layer	F_Deep Layer
E25_AGCATACAGACAGGCT-1	10XE25	15326	3722	11	F_Deep Layer	F_Deep Layer
E25_AGCATACAGCCATCGC-1	10XE25	7404	2347	9	F_earlyRG1	F_earlyRG
E25_AGCATACAGCGTGTCC-1	10XE25	9904	3077	11	F_Deep Layer	F_Deep Layer
E25_AGCATACCAACAACCT-1	10XE25	3348	1379	11	F_Deep Layer	F_Deep Layer
E25_AGCATACCACCTCGTT-1	10XE25	10134	3099	17	F_earlyRG2	F_earlyRG
E25_AGCATACCAGCTTCGG-1	10XE25	10689	2944	9	F_earlyRG1	F_earlyRG
E25_AGCATACCATATGAGA-1	10XE25	7569	2683	9	F_earlyRG1	F_earlyRG
E25_AGCATACGTAAGTAGT-1	10XE25	2675	1300	11	F_Deep Layer	F_Deep Layer
E25_AGCATACGTACTTCTT-1	10XE25	12710	3470	17	F_earlyRG2	F_earlyRG
E25_AGCATACGTGGACGAT-1	10XE25	7724	2315	11	F_Deep Layer	F_Deep Layer
E25_AGCATACTCTACTCAT-1	10XE25	8761	2524	9	F_earlyRG1	F_earlyRG
E25_AGCATACTCTTCTGGC-1	10XE25	7415	2474	9	F_earlyRG1	F_earlyRG
E25_AGCCTAAAGAACTGTA-1	10XE25	10819	3300	19	F_earlyRG3	F_earlyRG
E25_AGCCTAACACGAGGTA-1	10XE25	8021	2560	9	F_earlyRG1	F_earlyRG
E25_AGCCTAACAGGAATCG-1	10XE25	4012	1592	9	F_earlyRG1	F_earlyRG
E25_AGCCTAACATAACCTG-1	10XE25	4969	1782	9	F_earlyRG1	F_earlyRG
E25_AGCCTAAGTACCGTAT-1	10XE25	8810	2672	9	F_earlyRG1	F_earlyRG
E25_AGCCTAAGTATATGAG-1	10XE25	8129	2593	9	F_earlyRG1	F_earlyRG
E25_AGCCTAATCTTGCAAG-1	10XE25	12533	3413	17	F_earlyRG2	F_earlyRG
E25_AGCGGTCAGCCTATGT-1	10XE25	8500	2594	11	F_Deep Layer	F_Deep Layer
E25_AGCGGTCAGTCGTTTG-1	10XE25	3462	1424	4	F_IPC2	F_IPC
E25_AGCGGTCGTCCAAGTT-1	10XE25	10081	3038	9	F_earlyRG1	F_earlyRG
E25_AGCGGTCGTTTGGCGC-1	10XE25	9491	2912	19	F_earlyRG3	F_earlyRG
E25_AGCGGTCTCTACTTAC-1	10XE25	3936	1696	11	F_Deep Layer	F_Deep Layer
E25_AGCGTATAGCTTTGGT-1	10XE25	16430	4003	19	F_earlyRG3	F_earlyRG
E25_AGCGTATAGTCGAGTG-1	10XE25	5042	2039	3	F_ITN	F_ITN
E25_AGCGTATCAGCGTCCA-1	10XE25	11547	3290	19	F_earlyRG3	F_earlyRG
E25_AGCGTATGTCATGCAT-1	10XE25	10656	3068	11	F_Deep Layer	F_Deep Layer
E25_AGCGTATGTGAAGGCT-1	10XE25	10246	3024	11	F_Deep Layer	F_Deep Layer
E25_AGCGTATGTGCAACGA-1	10XE25	8407	2598	9	F_earlyRG1	F_earlyRG
E25_AGCGTATGTGCCTTGG-1	10XE25	7682	2743	19	F_earlyRG3	F_earlyRG
E25_AGCGTATGTTTGACTG-1	10XE25	6987	2310	9	F_earlyRG1	F_earlyRG
E25_AGCGTATTCACTCCTG-1	10XE25	5732	1178	19	F_earlyRG3	F_earlyRG
E25_AGCGTATTCGCATGGC-1	10XE25	14628	3634	19	F_earlyRG3	F_earlyRG
E25_AGCGTATTCGCTGATA-1	10XE25	6413	2262	11	F_Deep Layer	F_Deep Layer
E25_AGCGTCGAGACGCAAC-1	10XE25	7618	2313	9	F_earlyRG1	F_earlyRG
E25_AGCGTCGCAAAGCAAT-1	10XE25	6128	2165	19	F_earlyRG3	F_earlyRG
E25_AGCGTCGCAAGTTGTC-1	10XE25	2933	1316	11	F_Deep Layer	F_Deep Layer
E25_AGCGTCGCACTAAGTC-1	10XE25	8672	2635	9	F_earlyRG1	F_earlyRG
E25_AGCGTCGCAGTCGTGC-1	10XE25	3798	1587	11	F_Deep Layer	F_Deep Layer
E25_AGCGTCGGTCCTAGCG-1	10XE25	7870	2476	9	F_earlyRG1	F_earlyRG
E25_AGCGTCGGTTAGTGGG-1	10XE25	10016	3022	11	F_Deep Layer	F_Deep Layer
E25_AGCGTCGTCAAAGACA-1	10XE25	8113	2703	11	F_Deep Layer	F_Deep Layer
E25_AGCGTCGTCGGAATCT-1	10XE25	2533	1224	11	F_Deep Layer	F_Deep Layer
E25_AGCGTCGTCTTGAGGT-1	10XE25	1845	905	11	F_Deep Layer	F_Deep Layer
E25_AGCGTCGTCTTGCAAG-1	10XE25	5256	1871	9	F_earlyRG1	F_earlyRG
E25_AGCTCCTAGACAGAGA-1	10XE25	7939	2441	11	F_Deep Layer	F_Deep Layer
E25_AGCTCCTAGGCGATAC-1	10XE25	8631	2585	9	F_earlyRG1	F_earlyRG
E25_AGCTCCTCAGGACCCT-1	10XE25	7032	2187	11	F_Deep Layer	F_Deep Layer
E25_AGCTCCTGTCACAAGG-1	10XE25	10859	3220	17	F_earlyRG2	F_earlyRG
E25_AGCTCCTGTCCATGAT-1	10XE25	2643	1154	11	F_Deep Layer	F_Deep Layer
E25_AGCTCCTGTTCAACCA-1	10XE25	2849	1239	11	F_Deep Layer	F_Deep Layer
E25_AGCTCCTTCTTGTACT-1	10XE25	3599	1695	17	F_earlyRG2	F_earlyRG
E25_AGCTCCTTCTTTACGT-1	10XE25	8727	2613	11	F_Deep Layer	F_Deep Layer
E25_AGCTCTCAGAAACCTA-1	10XE25	8361	2705	9	F_earlyRG1	F_earlyRG
E25_AGCTCTCAGAAGGGTA-1	10XE25	7869	2450	9	F_earlyRG1	F_earlyRG
E25_AGCTCTCAGGCCCTCA-1	10XE25	8404	2919	17	F_earlyRG2	F_earlyRG
E25_AGCTCTCCAGTCACTA-1	10XE25	5684	2212	9	F_earlyRG1	F_earlyRG
E25_AGCTCTCGTGCAGACA-1	10XE25	12252	3595	19	F_earlyRG3	F_earlyRG
E25_AGCTTGATCTGAGTGT-1	10XE25	2326	1075	9	F_earlyRG1	F_earlyRG
E25_AGGCCACCATACAGCT-1	10XE25	10632	3083	4	F_IPC2	F_IPC
E25_AGGCCACTCAGGTTCA-1	10XE25	9274	2933	9	F_earlyRG1	F_earlyRG
E25_AGGCCACTCCTCAATT-1	10XE25	6047	2337	11	F_Deep Layer	F_Deep Layer
E25_AGGCCACTCGCCAGCA-1	10XE25	9706	3053	19	F_earlyRG3	F_earlyRG
E25_AGGCCACTCTCGTATT-1	10XE25	9433	2877	11	F_Deep Layer	F_Deep Layer
E25_AGGCCGTCATCCGGGT-1	10XE25	6594	2398	9	F_earlyRG1	F_earlyRG
E25_AGGCCGTCATCTATGG-1	10XE25	16666	856	25	F_unknown	F_unknown
E25_AGGCCGTTCAAAGTAG-1	10XE25	3466	1425	9	F_earlyRG1	F_earlyRG
E25_AGGGAGTAGATGCGAC-1	10XE25	9230	2655	9	F_earlyRG1	F_earlyRG
E25_AGGGAGTAGCTAACTC-1	10XE25	4281	1696	9	F_earlyRG1	F_earlyRG
E25_AGGGAGTAGGTGGGTT-1	10XE25	9840	3084	17	F_earlyRG2	F_earlyRG
E25_AGGGAGTAGTGATCGG-1	10XE25	8342	2725	14	F_Upper Layer3	F_Upper Layer
E25_AGGGAGTCAACTGCTA-1	10XE25	7458	2391	9	F_earlyRG1	F_earlyRG
E25_AGGGAGTGTCGACTAT-1	10XE25	11121	3162	17	F_earlyRG2	F_earlyRG
E25_AGGGAGTGTTCCACAA-1	10XE25	10729	3241	11	F_Deep Layer	F_Deep Layer
E25_AGGGAGTTCAAACAAG-1	10XE25	8706	2780	11	F_Deep Layer	F_Deep Layer
E25_AGGGAGTTCATCATTC-1	10XE25	13051	3583	19	F_earlyRG3	F_earlyRG
E25_AGGGATGAGAAACGCC-1	10XE25	11668	3422	17	F_earlyRG2	F_earlyRG
E25_AGGGATGAGACTACAA-1	10XE25	12363	3395	16	F_IPC3	F_IPC
E25_AGGGATGGTATTACCG-1	10XE25	9464	3051	19	F_earlyRG3	F_earlyRG
E25_AGGGATGGTTTAAGCC-1	10XE25	9914	3068	17	F_earlyRG2	F_earlyRG
E25_AGGGTGAAGGACACCA-1	10XE25	15801	3907	17	F_earlyRG2	F_earlyRG
E25_AGGGTGAAGTGACATA-1	10XE25	6965	2247	9	F_earlyRG1	F_earlyRG
E25_AGGGTGACACTATCTT-1	10XE25	4320	1597	11	F_Deep Layer	F_Deep Layer
E25_AGGGTGAGTACTCAAC-1	10XE25	7510	2563	9	F_earlyRG1	F_earlyRG
E25_AGGGTGAGTGATGTCT-1	10XE25	6949	2373	11	F_Deep Layer	F_Deep Layer
E25_AGGGTGAGTTCGTGAT-1	10XE25	10770	3271	17	F_earlyRG2	F_earlyRG
E25_AGGGTGAGTTGCCTCT-1	10XE25	8512	2797	19	F_earlyRG3	F_earlyRG
E25_AGGGTGATCATCGCTC-1	10XE25	8226	2508	11	F_Deep Layer	F_Deep Layer
E25_AGGGTGATCTCAAGTG-1	10XE25	9330	2807	9	F_earlyRG1	F_earlyRG
E25_AGGTCATAGACACGAC-1	10XE25	6708	2375	17	F_earlyRG2	F_earlyRG
E25_AGGTCATAGGGTTTCT-1	10XE25	11412	3411	11	F_Deep Layer	F_Deep Layer
E25_AGGTCATAGGTAAACT-1	10XE25	2635	1202	9	F_earlyRG1	F_earlyRG
E25_AGGTCATCATATACCG-1	10XE25	9264	2899	17	F_earlyRG2	F_earlyRG
E25_AGGTCATCATTCGACA-1	10XE25	9288	2638	11	F_Deep Layer	F_Deep Layer
E25_AGGTCATGTACCGGCT-1	10XE25	8327	2766	17	F_earlyRG2	F_earlyRG
E25_AGGTCATGTCACTTCC-1	10XE25	6430	2210	9	F_earlyRG1	F_earlyRG
E25_AGGTCATGTTGGGACA-1	10XE25	2999	1305	9	F_earlyRG1	F_earlyRG
E25_AGGTCATTCAAACCAC-1	10XE25	8297	2655	9	F_earlyRG1	F_earlyRG
E25_AGGTCATTCACATACG-1	10XE25	11421	3516	19	F_earlyRG3	F_earlyRG
E25_AGGTCATTCAGTTGAC-1	10XE25	9078	2795	17	F_earlyRG2	F_earlyRG
E25_AGGTCATTCTCTTGAT-1	10XE25	8338	2701	14	F_Upper Layer3	F_Upper Layer
E25_AGGTCCGAGCGTGAGT-1	10XE25	7699	2557	9	F_earlyRG1	F_earlyRG
E25_AGGTCCGAGGTAGCCA-1	10XE25	3724	1555	11	F_Deep Layer	F_Deep Layer
E25_AGGTCCGAGTGGTCCC-1	10XE25	4101	1824	9	F_earlyRG1	F_earlyRG
E25_AGGTCCGCAAGCCTAT-1	10XE25	8854	2696	9	F_earlyRG1	F_earlyRG
E25_AGGTCCGCAAGGACTG-1	10XE25	4566	1852	11	F_Deep Layer	F_Deep Layer
E25_AGGTCCGGTAAGAGAG-1	10XE25	4219	1809	11	F_Deep Layer	F_Deep Layer
E25_AGGTCCGGTATAAACG-1	10XE25	10577	3224	11	F_Deep Layer	F_Deep Layer
E25_AGGTCCGGTTATGCGT-1	10XE25	6752	2197	11	F_Deep Layer	F_Deep Layer
E25_AGGTCCGTCCCGGATG-1	10XE25	10172	2908	11	F_Deep Layer	F_Deep Layer
E25_AGGTCCGTCTTGTATC-1	10XE25	9157	2852	17	F_earlyRG2	F_earlyRG
E25_AGTAGTCAGCACACAG-1	10XE25	8544	2726	9	F_earlyRG1	F_earlyRG
E25_AGTAGTCAGGAATCGC-1	10XE25	8541	2497	9	F_earlyRG1	F_earlyRG
E25_AGTAGTCAGGACAGAA-1	10XE25	10755	3061	11	F_Deep Layer	F_Deep Layer
E25_AGTAGTCAGGATGTAT-1	10XE25	6977	2293	9	F_earlyRG1	F_earlyRG
E25_AGTAGTCAGGCAAAGA-1	10XE25	11921	3263	11	F_Deep Layer	F_Deep Layer
E25_AGTAGTCAGGTGCACA-1	10XE25	8022	2430	9	F_earlyRG1	F_earlyRG
E25_AGTAGTCAGTCCCACG-1	10XE25	8535	2756	17	F_earlyRG2	F_earlyRG
E25_AGTAGTCCACTCGACG-1	10XE25	9635	2847	9	F_earlyRG1	F_earlyRG
E25_AGTAGTCTCCTCAATT-1	10XE25	15133	3705	19	F_earlyRG3	F_earlyRG
E25_AGTAGTCTCTCCAGGG-1	10XE25	1854	845	18	F_Upper Layer4	F_Upper Layer
E25_AGTCTTTAGAACAATC-1	10XE25	12086	3405	17	F_earlyRG2	F_earlyRG
E25_AGTCTTTAGTCCGTAT-1	10XE25	10518	3147	17	F_earlyRG2	F_earlyRG
E25_AGTCTTTCATCACCCT-1	10XE25	6585	2123	11	F_Deep Layer	F_Deep Layer
E25_AGTCTTTGTAACGCGA-1	10XE25	9567	2712	9	F_earlyRG1	F_earlyRG
E25_AGTCTTTGTCGTGGCT-1	10XE25	7752	2356	9	F_earlyRG1	F_earlyRG
E25_AGTCTTTGTCTTTCAT-1	10XE25	7861	2513	9	F_earlyRG1	F_earlyRG
E25_AGTGAGGAGCATGGCA-1	10XE25	6801	2202	11	F_Deep Layer	F_Deep Layer
E25_AGTGAGGAGCCAGGAT-1	10XE25	9048	2642	9	F_earlyRG1	F_earlyRG
E25_AGTGAGGAGCTAAACA-1	10XE25	6462	2123	9	F_earlyRG1	F_earlyRG
E25_AGTGAGGCACATCCGG-1	10XE25	11408	3147	17	F_earlyRG2	F_earlyRG
E25_AGTGAGGCAGACAAGC-1	10XE25	11136	3309	17	F_earlyRG2	F_earlyRG
E25_AGTGAGGCAGATTGCT-1	10XE25	8701	2719	17	F_earlyRG2	F_earlyRG
E25_AGTGAGGCATTCTTAC-1	10XE25	7529	2459	9	F_earlyRG1	F_earlyRG
E25_AGTGAGGGTCATGCCG-1	10XE25	10715	3135	11	F_Deep Layer	F_Deep Layer
E25_AGTGAGGGTCGACTAT-1	10XE25	3785	1666	17	F_earlyRG2	F_earlyRG
E25_AGTGAGGTCACATAGC-1	10XE25	8826	2537	9	F_earlyRG1	F_earlyRG
E25_AGTGAGGTCGGTTAAC-1	10XE25	7968	2530	9	F_earlyRG1	F_earlyRG
E25_AGTGAGGTCTGATACG-1	10XE25	4458	1895	19	F_earlyRG3	F_earlyRG
E25_AGTGGGAAGACCTAGG-1	10XE25	7934	2508	9	F_earlyRG1	F_earlyRG
E25_AGTGGGAAGTAGGCCA-1	10XE25	7465	2365	11	F_Deep Layer	F_Deep Layer
E25_AGTGGGAGTCGAAAGC-1	10XE25	9788	3051	17	F_earlyRG2	F_earlyRG
E25_AGTGGGAGTGAGGCTA-1	10XE25	7061	2196	9	F_earlyRG1	F_earlyRG
E25_AGTGGGATCCAAACAC-1	10XE25	11354	3473	11	F_Deep Layer	F_Deep Layer
E25_AGTGGGATCTGGAGCC-1	10XE25	11337	3259	9	F_earlyRG1	F_earlyRG
E25_AGTGTCAAGCGCTTAT-1	10XE25	6825	2456	19	F_earlyRG3	F_earlyRG
E25_AGTGTCAAGTGACTCT-1	10XE25	8343	2717	19	F_earlyRG3	F_earlyRG
E25_AGTGTCACAGCCAGAA-1	10XE25	4738	1858	19	F_earlyRG3	F_earlyRG
E25_AGTGTCACAGGACCCT-1	10XE25	4267	1655	9	F_earlyRG1	F_earlyRG
E25_AGTGTCAGTACGAAAT-1	10XE25	10029	3043	17	F_earlyRG2	F_earlyRG
E25_AGTGTCAGTCTTCTCG-1	10XE25	11216	3230	11	F_Deep Layer	F_Deep Layer
E25_AGTGTCATCCGTCATC-1	10XE25	11353	3298	17	F_earlyRG2	F_earlyRG
E25_AGTGTCATCTATCCTA-1	10XE25	5845	2061	11	F_Deep Layer	F_Deep Layer
E25_AGTTGGTAGGCGCTCT-1	10XE25	7528	2576	19	F_earlyRG3	F_earlyRG
E25_AGTTGGTCAAGCGATG-1	10XE25	6966	2183	11	F_Deep Layer	F_Deep Layer
E25_AGTTGGTCATCGGGTC-1	10XE25	13481	3595	11	F_Deep Layer	F_Deep Layer
E25_AGTTGGTCATTGCGGC-1	10XE25	10004	2863	9	F_earlyRG1	F_earlyRG
E25_AGTTGGTGTAGGAGTC-1	10XE25	11046	3183	11	F_Deep Layer	F_Deep Layer
E25_AGTTGGTGTCGCATAT-1	10XE25	7436	2552	17	F_earlyRG2	F_earlyRG
E25_AGTTGGTTCATTGCCC-1	10XE25	6524	2157	11	F_Deep Layer	F_Deep Layer
E25_ATAACGCAGCGTCTAT-1	10XE25	5069	2077	3	F_ITN	F_ITN
E25_ATAAGAGCAGCATGAG-1	10XE25	11397	3227	11	F_Deep Layer	F_Deep Layer
E25_ATAAGAGGTTCGGCAC-1	10XE25	3466	1412	11	F_Deep Layer	F_Deep Layer
E25_ATAGACCAGACAGAGA-1	10XE25	6049	2182	9	F_earlyRG1	F_earlyRG
E25_ATAGACCCAAACTGTC-1	10XE25	5997	2220	19	F_earlyRG3	F_earlyRG
E25_ATAGACCCAAAGTGCG-1	10XE25	2580	1224	9	F_earlyRG1	F_earlyRG
E25_ATAGACCCACGCATCG-1	10XE25	10258	3087	19	F_earlyRG3	F_earlyRG
E25_ATAGACCCACTGTCGG-1	10XE25	10846	3266	17	F_earlyRG2	F_earlyRG
E25_ATAGACCCAGACAGGT-1	10XE25	9324	2584	11	F_Deep Layer	F_Deep Layer
E25_ATAGACCCAGGGTATG-1	10XE25	9434	2687	9	F_earlyRG1	F_earlyRG
E25_ATAGACCGTAAATACG-1	10XE25	3558	1373	9	F_earlyRG1	F_earlyRG
E25_ATAGACCGTTAGAACA-1	10XE25	8127	2471	11	F_Deep Layer	F_Deep Layer
E25_ATAGACCTCACGGTTA-1	10XE25	9448	2981	17	F_earlyRG2	F_earlyRG
E25_ATCACGACAACTGGCC-1	10XE25	9751	2749	9	F_earlyRG1	F_earlyRG
E25_ATCACGACACATCCAA-1	10XE25	2427	1062	9	F_earlyRG1	F_earlyRG
E25_ATCACGACAGGGAGAG-1	10XE25	11844	3383	19	F_earlyRG3	F_earlyRG
E25_ATCACGAGTAGAAGGA-1	10XE25	6990	2382	9	F_earlyRG1	F_earlyRG
E25_ATCACGAGTAGTAGTA-1	10XE25	13255	3490	17	F_earlyRG2	F_earlyRG
E25_ATCACGAGTATTACCG-1	10XE25	12450	3399	17	F_earlyRG2	F_earlyRG
E25_ATCACGAGTCAATACC-1	10XE25	8430	2700	9	F_earlyRG1	F_earlyRG
E25_ATCACGAGTGAAGGCT-1	10XE25	8184	2338	11	F_Deep Layer	F_Deep Layer
E25_ATCACGAGTGCGAAAC-1	10XE25	3917	1530	9	F_earlyRG1	F_earlyRG
E25_ATCACGAGTTTAGGAA-1	10XE25	10139	2996	9	F_earlyRG1	F_earlyRG
E25_ATCACGAGTTTGTTGG-1	10XE25	9003	2726	17	F_earlyRG2	F_earlyRG
E25_ATCACGATCACCGGGT-1	10XE25	8375	2500	9	F_earlyRG1	F_earlyRG
E25_ATCACGATCATAACCG-1	10XE25	10332	3322	11	F_Deep Layer	F_Deep Layer
E25_ATCATCTAGTATTGGA-1	10XE25	9748	3005	11	F_Deep Layer	F_Deep Layer
E25_ATCATCTCAATGGTCT-1	10XE25	15375	4131	17	F_earlyRG2	F_earlyRG
E25_ATCATCTCAATGTAAG-1	10XE25	4818	1872	19	F_earlyRG3	F_earlyRG
E25_ATCATCTCACATGTGT-1	10XE25	8288	2543	11	F_Deep Layer	F_Deep Layer
E25_ATCATCTCATAACCTG-1	10XE25	6834	2392	9	F_earlyRG1	F_earlyRG
E25_ATCATCTGTACCGGCT-1	10XE25	11465	3260	17	F_earlyRG2	F_earlyRG
E25_ATCATCTGTTGCGTTA-1	10XE25	9404	2963	11	F_Deep Layer	F_Deep Layer
E25_ATCATCTTCACAACGT-1	10XE25	12044	3278	19	F_earlyRG3	F_earlyRG
E25_ATCATCTTCATGCAAC-1	10XE25	16953	4132	19	F_earlyRG3	F_earlyRG
E25_ATCATCTTCCACGACG-1	10XE25	5723	2040	11	F_Deep Layer	F_Deep Layer
E25_ATCATCTTCGGAGGTA-1	10XE25	9774	2910	17	F_earlyRG2	F_earlyRG
E25_ATCATGGAGCGCCTCA-1	10XE25	7636	2361	11	F_Deep Layer	F_Deep Layer
E25_ATCATGGGTACTTCTT-1	10XE25	10007	3064	17	F_earlyRG2	F_earlyRG
E25_ATCCACCAGATCTGCT-1	10XE25	7854	2429	9	F_earlyRG1	F_earlyRG
E25_ATCCACCAGATTACCC-1	10XE25	16441	3891	9	F_earlyRG1	F_earlyRG
E25_ATCCACCCAGGAATCG-1	10XE25	5989	2089	9	F_earlyRG1	F_earlyRG
E25_ATCCACCCATCCGCGA-1	10XE25	6349	2532	9	F_earlyRG1	F_earlyRG
E25_ATCCACCCATGGGACA-1	10XE25	18692	4530	19	F_earlyRG3	F_earlyRG
E25_ATCCACCGTTCCACTC-1	10XE25	7775	2463	19	F_earlyRG3	F_earlyRG
E25_ATCCACCTCTTACCGC-1	10XE25	8540	2475	11	F_Deep Layer	F_Deep Layer
E25_ATCCGAAAGTCAATAG-1	10XE25	3842	1483	11	F_Deep Layer	F_Deep Layer
E25_ATCCGAAAGTTGCAGG-1	10XE25	7173	2391	11	F_Deep Layer	F_Deep Layer
E25_ATCCGAACACAGGCCT-1	10XE25	3840	1647	4	F_IPC2	F_IPC
E25_ATCCGAACACTGCCAG-1	10XE25	8430	2868	17	F_earlyRG2	F_earlyRG
E25_ATCCGAATCGGTCTAA-1	10XE25	7748	2519	9	F_earlyRG1	F_earlyRG
E25_ATCCGAATCTTGTTTG-1	10XE25	8622	2893	19	F_earlyRG3	F_earlyRG
E25_ATCGAGTAGTAATCCC-1	10XE25	6106	2303	11	F_Deep Layer	F_Deep Layer
E25_ATCGAGTCATGGTCAT-1	10XE25	7714	2693	9	F_earlyRG1	F_earlyRG
E25_ATCGAGTGTAGCCTAT-1	10XE25	4784	1736	17	F_earlyRG2	F_earlyRG
E25_ATCGAGTGTCTAGTCA-1	10XE25	8595	2647	11	F_Deep Layer	F_Deep Layer
E25_ATCGAGTGTGTTGAGG-1	10XE25	2646	1126	9	F_earlyRG1	F_earlyRG
E25_ATCGAGTGTTCCGGCA-1	10XE25	3633	1614	9	F_earlyRG1	F_earlyRG
E25_ATCGAGTTCAGCACAT-1	10XE25	8049	2626	9	F_earlyRG1	F_earlyRG
E25_ATCGAGTTCATTCACT-1	10XE25	8521	2699	9	F_earlyRG1	F_earlyRG
E25_ATCGAGTTCCGTAGGC-1	10XE25	8042	2511	9	F_earlyRG1	F_earlyRG
E25_ATCGAGTTCGCGTAGC-1	10XE25	9372	2816	11	F_Deep Layer	F_Deep Layer
E25_ATCGAGTTCTTGAGGT-1	10XE25	12537	3426	11	F_Deep Layer	F_Deep Layer
E25_ATCTACTAGATGGGTC-1	10XE25	2477	1128	11	F_Deep Layer	F_Deep Layer
E25_ATCTACTCACAAGACG-1	10XE25	4521	1976	17	F_earlyRG2	F_earlyRG
E25_ATCTACTCAGACGCTC-1	10XE25	8192	2377	9	F_earlyRG1	F_earlyRG
E25_ATCTACTCAGTTCATG-1	10XE25	14029	3692	17	F_earlyRG2	F_earlyRG
E25_ATCTACTCATCACCCT-1	10XE25	8914	2668	9	F_earlyRG1	F_earlyRG
E25_ATCTACTTCCCTCAGT-1	10XE25	13253	3346	12	F_Microglia2	F_Microglia
E25_ATCTACTTCGCACTCT-1	10XE25	9793	2936	9	F_earlyRG1	F_earlyRG
E25_ATCTGCCAGAAACGCC-1	10XE25	11650	3178	17	F_earlyRG2	F_earlyRG
E25_ATCTGCCCACTATCTT-1	10XE25	3314	1167	11	F_Deep Layer	F_Deep Layer
E25_ATCTGCCCAGTCGATT-1	10XE25	10776	3388	17	F_earlyRG2	F_earlyRG
E25_ATCTGCCCAGTTTACG-1	10XE25	5092	1953	17	F_earlyRG2	F_earlyRG
E25_ATCTGCCGTGTATGGG-1	10XE25	5023	2032	14	F_Upper Layer3	F_Upper Layer
E25_ATCTGCCGTGTTTGGT-1	10XE25	10284	3157	19	F_earlyRG3	F_earlyRG
E25_ATCTGCCTCCACGACG-1	10XE25	5014	1995	11	F_Deep Layer	F_Deep Layer
E25_ATGAGGGAGACGCTTT-1	10XE25	2582	999	9	F_earlyRG1	F_earlyRG
E25_ATGAGGGAGGTTACCT-1	10XE25	8254	2741	11	F_Deep Layer	F_Deep Layer
E25_ATGAGGGCAATGGTCT-1	10XE25	9144	3021	4	F_IPC2	F_IPC
E25_ATGAGGGGTAGGCATG-1	10XE25	13786	3684	19	F_earlyRG3	F_earlyRG
E25_ATGAGGGGTGACGGTA-1	10XE25	3686	1570	9	F_earlyRG1	F_earlyRG
E25_ATGAGGGTCATCACCC-1	10XE25	5599	1998	11	F_Deep Layer	F_Deep Layer
E25_ATGCGATAGGCTCTTA-1	10XE25	10831	2870	11	F_Deep Layer	F_Deep Layer
E25_ATGCGATCACGGCTAC-1	10XE25	11603	3134	17	F_earlyRG2	F_earlyRG
E25_ATGCGATGTCTCTCGT-1	10XE25	16307	4064	19	F_earlyRG3	F_earlyRG
E25_ATGCGATTCGGTGTCG-1	10XE25	12175	3090	11	F_Deep Layer	F_Deep Layer
E25_ATGGGAGCAAAGCAAT-1	10XE25	6816	2397	9	F_earlyRG1	F_earlyRG
E25_ATGGGAGCACAGAGGT-1	10XE25	12378	3226	19	F_earlyRG3	F_earlyRG
E25_ATGGGAGGTGTCCTCT-1	10XE25	5243	1981	3	F_ITN	F_ITN
E25_ATGGGAGGTGTTTGGT-1	10XE25	10837	2850	9	F_earlyRG1	F_earlyRG
E25_ATGGGAGTCTGGCGAC-1	10XE25	13815	3626	11	F_Deep Layer	F_Deep Layer
E25_ATGTGTGAGAGCCCAA-1	10XE25	8008	2540	9	F_earlyRG1	F_earlyRG
E25_ATGTGTGAGTTAAGTG-1	10XE25	3204	1340	11	F_Deep Layer	F_Deep Layer
E25_ATGTGTGTCGGCGCTA-1	10XE25	7015	2309	9	F_earlyRG1	F_earlyRG
E25_ATGTGTGTCGGCGGTT-1	10XE25	6830	2519	19	F_earlyRG3	F_earlyRG
E25_ATGTGTGTCGTAGATC-1	10XE25	7775	2458	9	F_earlyRG1	F_earlyRG
E25_ATGTGTGTCTTGAGAC-1	10XE25	8661	2798	11	F_Deep Layer	F_Deep Layer
E25_ATTACTCAGCAGGCTA-1	10XE25	3041	1232	9	F_earlyRG1	F_earlyRG
E25_ATTACTCAGCGGCTTC-1	10XE25	10068	2997	17	F_earlyRG2	F_earlyRG
E25_ATTACTCAGTAGGCCA-1	10XE25	3317	1506	11	F_Deep Layer	F_Deep Layer
E25_ATTACTCAGTCCGGTC-1	10XE25	8583	2968	17	F_earlyRG2	F_earlyRG
E25_ATTACTCCAGGACCCT-1	10XE25	7358	2400	9	F_earlyRG1	F_earlyRG
E25_ATTACTCTCAAACGGG-1	10XE25	6129	2414	17	F_earlyRG2	F_earlyRG
E25_ATTACTCTCCAAGTAC-1	10XE25	10219	3077	17	F_earlyRG2	F_earlyRG
E25_ATTACTCTCGATAGAA-1	10XE25	8303	2364	11	F_Deep Layer	F_Deep Layer
E25_ATTACTCTCGGAAACG-1	10XE25	14718	3758	19	F_earlyRG3	F_earlyRG
E25_ATTATCCAGTGTCCAT-1	10XE25	3591	1517	9	F_earlyRG1	F_earlyRG
E25_ATTATCCCACAGCCCA-1	10XE25	7228	2311	11	F_Deep Layer	F_Deep Layer
E25_ATTATCCCAGGAATCG-1	10XE25	12792	3372	17	F_earlyRG2	F_earlyRG
E25_ATTATCCCATTCCTCG-1	10XE25	15713	3954	17	F_earlyRG2	F_earlyRG
E25_ATTATCCGTATTCTCT-1	10XE25	6953	2372	9	F_earlyRG1	F_earlyRG
E25_ATTATCCTCGGCGCAT-1	10XE25	11015	3349	11	F_Deep Layer	F_Deep Layer
E25_ATTATCCTCTTGGGTA-1	10XE25	6593	2421	19	F_earlyRG3	F_earlyRG
E25_ATTCTACAGTGCAAGC-1	10XE25	10378	3045	11	F_Deep Layer	F_Deep Layer
E25_ATTCTACCACTTACGA-1	10XE25	13303	775	25	F_unknown	F_unknown
E25_ATTCTACCAGGATTGG-1	10XE25	11780	3321	11	F_Deep Layer	F_Deep Layer
E25_ATTCTACTCGAACTGT-1	10XE25	3692	1445	9	F_earlyRG1	F_earlyRG
E25_ATTCTACTCGACCAGC-1	10XE25	5113	2020	9	F_earlyRG1	F_earlyRG
E25_ATTGGACAGCGTGAGT-1	10XE25	5535	2266	19	F_earlyRG3	F_earlyRG
E25_ATTGGACAGTATGACA-1	10XE25	10455	3088	11	F_Deep Layer	F_Deep Layer
E25_ATTGGACGTCCGAGTC-1	10XE25	12740	3476	19	F_earlyRG3	F_earlyRG
E25_ATTGGACTCAACGGCC-1	10XE25	19936	4379	17	F_earlyRG2	F_earlyRG
E25_ATTGGACTCAGCTCGG-1	10XE25	9345	2627	9	F_earlyRG1	F_earlyRG
E25_ATTGGTGAGACTAAGT-1	10XE25	2480	1268	19	F_earlyRG3	F_earlyRG
E25_ATTGGTGCACATTTCT-1	10XE25	8238	2591	9	F_earlyRG1	F_earlyRG
E25_ATTGGTGCACGTGAGA-1	10XE25	7469	2597	9	F_earlyRG1	F_earlyRG
E25_ATTGGTGGTAGCACGA-1	10XE25	10693	3118	17	F_earlyRG2	F_earlyRG
E25_ATTTCTGAGACGACGT-1	10XE25	13180	839	25	F_unknown	F_unknown
E25_ATTTCTGAGATGCGAC-1	10XE25	12042	3312	17	F_earlyRG2	F_earlyRG
E25_ATTTCTGAGTTACGGG-1	10XE25	10244	3072	17	F_earlyRG2	F_earlyRG
E25_ATTTCTGCACGTGAGA-1	10XE25	6762	2741	17	F_earlyRG2	F_earlyRG
E25_ATTTCTGCAGGGTACA-1	10XE25	8965	2887	14	F_Upper Layer3	F_Upper Layer
E25_ATTTCTGCAGTAAGCG-1	10XE25	7976	2429	9	F_earlyRG1	F_earlyRG
E25_ATTTCTGTCACGGTTA-1	10XE25	4064	1527	9	F_earlyRG1	F_earlyRG
E25_ATTTCTGTCAGAGACG-1	10XE25	11784	3383	17	F_earlyRG2	F_earlyRG
E25_ATTTCTGTCAGCGATT-1	10XE25	4391	1882	14	F_Upper Layer3	F_Upper Layer
E25_ATTTCTGTCTTACCTA-1	10XE25	7228	2439	9	F_earlyRG1	F_earlyRG
E25_CAACCAAAGCTGAACG-1	10XE25	2301	1039	9	F_earlyRG1	F_earlyRG
E25_CAACCAACACAGCGTC-1	10XE25	9813	3095	4	F_IPC2	F_IPC
E25_CAACCAACACATGGGA-1	10XE25	5270	1927	11	F_Deep Layer	F_Deep Layer
E25_CAACCAACACTGCCAG-1	10XE25	6911	2295	9	F_earlyRG1	F_earlyRG
E25_CAACCAATCGTAGGTT-1	10XE25	8297	2516	11	F_Deep Layer	F_Deep Layer
E25_CAACCTCAGAGCTTCT-1	10XE25	10738	3233	17	F_earlyRG2	F_earlyRG
E25_CAACCTCCACCGGAAA-1	10XE25	7308	2262	9	F_earlyRG1	F_earlyRG
E25_CAACCTCCATGCAACT-1	10XE25	7551	2415	9	F_earlyRG1	F_earlyRG
E25_CAACCTCCATGTAGTC-1	10XE25	10241	2989	9	F_earlyRG1	F_earlyRG
E25_CAACCTCGTACTTGAC-1	10XE25	8206	2620	9	F_earlyRG1	F_earlyRG
E25_CAACCTCGTGAACCTT-1	10XE25	9913	3158	19	F_earlyRG3	F_earlyRG
E25_CAACCTCGTGACAAAT-1	10XE25	7540	2574	9	F_earlyRG1	F_earlyRG
E25_CAACCTCGTTACCGAT-1	10XE25	7591	2428	9	F_earlyRG1	F_earlyRG
E25_CAACTAGAGACGCACA-1	10XE25	8044	2510	17	F_earlyRG2	F_earlyRG
E25_CAACTAGGTGGCAAAC-1	10XE25	8258	2431	9	F_earlyRG1	F_earlyRG
E25_CAACTAGTCGGTTAAC-1	10XE25	6000	2249	19	F_earlyRG3	F_earlyRG
E25_CAAGAAAAGAGGTTGC-1	10XE25	8685	2589	9	F_earlyRG1	F_earlyRG
E25_CAAGAAAAGCCGATTT-1	10XE25	9997	2908	19	F_earlyRG3	F_earlyRG
E25_CAAGAAAAGGCATGGT-1	10XE25	3428	1656	17	F_earlyRG2	F_earlyRG
E25_CAAGAAAAGGGTGTTG-1	10XE25	7375	2325	9	F_earlyRG1	F_earlyRG
E25_CAAGAAACAAGAGGCT-1	10XE25	11394	3238	11	F_Deep Layer	F_Deep Layer
E25_CAAGAAACACATGGGA-1	10XE25	8404	2580	9	F_earlyRG1	F_earlyRG
E25_CAAGAAACACCACCAG-1	10XE25	3330	1478	9	F_earlyRG1	F_earlyRG
E25_CAAGAAACAGTCACTA-1	10XE25	7569	2706	19	F_earlyRG3	F_earlyRG
E25_CAAGAAACAGTCAGAG-1	10XE25	15331	3921	19	F_earlyRG3	F_earlyRG
E25_CAAGAAACATAAGACA-1	10XE25	5727	1980	11	F_Deep Layer	F_Deep Layer
E25_CAAGAAAGTCTTTCAT-1	10XE25	12577	3646	11	F_Deep Layer	F_Deep Layer
E25_CAAGAAAGTTAAGATG-1	10XE25	8477	2603	9	F_earlyRG1	F_earlyRG
E25_CAAGAAAGTTCAGGCC-1	10XE25	5910	2365	19	F_earlyRG3	F_earlyRG
E25_CAAGAAATCGCCCTTA-1	10XE25	12567	3473	19	F_earlyRG3	F_earlyRG
E25_CAAGATCAGCTACCGC-1	10XE25	5398	2087	11	F_Deep Layer	F_Deep Layer
E25_CAAGATCAGTGTTGAA-1	10XE25	3174	1407	11	F_Deep Layer	F_Deep Layer
E25_CAAGATCCAAGCCATT-1	10XE25	7786	2473	11	F_Deep Layer	F_Deep Layer
E25_CAAGATCGTGACGGTA-1	10XE25	9847	3033	17	F_earlyRG2	F_earlyRG
E25_CAAGATCGTGGCCCTA-1	10XE25	7911	2354	9	F_earlyRG1	F_earlyRG
E25_CAAGATCGTTCTGAAC-1	10XE25	5860	2212	11	F_Deep Layer	F_Deep Layer
E25_CAAGATCGTTGAGTTC-1	10XE25	7278	2294	9	F_earlyRG1	F_earlyRG
E25_CAAGATCTCTAGCACA-1	10XE25	5982	2259	11	F_Deep Layer	F_Deep Layer
E25_CAAGGCCAGGTGACCA-1	10XE25	8329	2512	11	F_Deep Layer	F_Deep Layer
E25_CAAGGCCAGTCTCAAC-1	10XE25	6045	2139	11	F_Deep Layer	F_Deep Layer
E25_CAAGGCCAGTGTTAGA-1	10XE25	6073	2334	19	F_earlyRG3	F_earlyRG
E25_CAAGGCCCAACCGCCA-1	10XE25	7125	2142	9	F_earlyRG1	F_earlyRG
E25_CAAGGCCTCACTTCAT-1	10XE25	13930	3700	19	F_earlyRG3	F_earlyRG
E25_CAAGGCCTCTGGCGTG-1	10XE25	5628	2144	19	F_earlyRG3	F_earlyRG
E25_CAAGTTGAGACTAGGC-1	10XE25	10504	3072	17	F_earlyRG2	F_earlyRG
E25_CAAGTTGCACGGATAG-1	10XE25	4628	1777	9	F_earlyRG1	F_earlyRG
E25_CAAGTTGCACGTGAGA-1	10XE25	11865	3346	17	F_earlyRG2	F_earlyRG
E25_CAAGTTGCATCGATGT-1	10XE25	6693	2190	9	F_earlyRG1	F_earlyRG
E25_CAAGTTGGTGAAATCA-1	10XE25	5457	1965	11	F_Deep Layer	F_Deep Layer
E25_CAAGTTGGTGGTCCGT-1	10XE25	3334	1608	11	F_Deep Layer	F_Deep Layer
E25_CAAGTTGGTTCCCTTG-1	10XE25	10039	2749	9	F_earlyRG1	F_earlyRG
E25_CAAGTTGGTTGCGTTA-1	10XE25	10354	2927	9	F_earlyRG1	F_earlyRG
E25_CAAGTTGTCTTCCTTC-1	10XE25	9909	3152	17	F_earlyRG2	F_earlyRG
E25_CACAAACAGATGTAAC-1	10XE25	8510	2621	9	F_earlyRG1	F_earlyRG
E25_CACAAACAGCTGAAAT-1	10XE25	10274	2643	20	F_mural	F_mural
E25_CACAAACCAAGAAAGG-1	10XE25	17249	3984	19	F_earlyRG3	F_earlyRG
E25_CACAAACCATTAGGCT-1	10XE25	7494	2729	16	F_IPC3	F_IPC
E25_CACAAACGTTACTGAC-1	10XE25	14996	3691	11	F_Deep Layer	F_Deep Layer
E25_CACAAACGTTCGTGAT-1	10XE25	10492	3002	17	F_earlyRG2	F_earlyRG
E25_CACAAACGTTGATTCG-1	10XE25	6500	2280	9	F_earlyRG1	F_earlyRG
E25_CACAAACGTTGTTTGG-1	10XE25	7205	2194	9	F_earlyRG1	F_earlyRG
E25_CACACAAAGCGATATA-1	10XE25	7457	2388	9	F_earlyRG1	F_earlyRG
E25_CACACAAAGCTGAAAT-1	10XE25	2463	1005	9	F_earlyRG1	F_earlyRG
E25_CACACAACACCAGGCT-1	10XE25	8847	2757	11	F_Deep Layer	F_Deep Layer
E25_CACACAACACGCTTTC-1	10XE25	3955	1459	11	F_Deep Layer	F_Deep Layer
E25_CACACAACAGATCTGT-1	10XE25	14403	3865	19	F_earlyRG3	F_earlyRG
E25_CACACAACATTCCTGC-1	10XE25	4052	1587	11	F_Deep Layer	F_Deep Layer
E25_CACACAACATTGAGCT-1	10XE25	6605	2329	9	F_earlyRG1	F_earlyRG
E25_CACACAAGTGCGGTAA-1	10XE25	8631	2992	19	F_earlyRG3	F_earlyRG
E25_CACACAAGTTATCCGA-1	10XE25	7031	2435	9	F_earlyRG1	F_earlyRG
E25_CACACAATCCCTAACC-1	10XE25	15006	3850	9	F_earlyRG1	F_earlyRG
E25_CACACCTAGCCACGCT-1	10XE25	9584	3160	17	F_earlyRG2	F_earlyRG
E25_CACACCTAGTGTACGG-1	10XE25	3370	1485	9	F_earlyRG1	F_earlyRG
E25_CACACCTAGTTACCCA-1	10XE25	8724	2950	19	F_earlyRG3	F_earlyRG
E25_CACACCTCACATCTTT-1	10XE25	19636	4602	19	F_earlyRG3	F_earlyRG
E25_CACACCTCACCACCAG-1	10XE25	14570	4000	19	F_earlyRG3	F_earlyRG
E25_CACACCTCACTGTCGG-1	10XE25	4555	1746	9	F_earlyRG1	F_earlyRG
E25_CACACCTCATACTCTT-1	10XE25	3741	1576	9	F_earlyRG1	F_earlyRG
E25_CACACCTGTAGCTCCG-1	10XE25	10148	3031	9	F_earlyRG1	F_earlyRG
E25_CACACCTGTATCTGCA-1	10XE25	3068	1326	19	F_earlyRG3	F_earlyRG
E25_CACACCTTCAATAAGG-1	10XE25	5773	2110	17	F_earlyRG2	F_earlyRG
E25_CACACCTTCGCCGTGA-1	10XE25	10506	3117	4	F_IPC2	F_IPC
E25_CACACTCAGCCGCCTA-1	10XE25	14300	3663	17	F_earlyRG2	F_earlyRG
E25_CACACTCCAACTGGCC-1	10XE25	9834	2980	17	F_earlyRG2	F_earlyRG
E25_CACACTCCAAGTACCT-1	10XE25	7716	2465	9	F_earlyRG1	F_earlyRG
E25_CACACTCCAGCTTCGG-1	10XE25	6132	2273	19	F_earlyRG3	F_earlyRG
E25_CACACTCGTAGTAGTA-1	10XE25	3709	1647	3	F_ITN	F_ITN
E25_CACACTCGTCCTCCAT-1	10XE25	8263	2768	9	F_earlyRG1	F_earlyRG
E25_CACACTCGTTCAGGCC-1	10XE25	7413	2296	9	F_earlyRG1	F_earlyRG
E25_CACACTCTCGAATGCT-1	10XE25	10284	2978	9	F_earlyRG1	F_earlyRG
E25_CACACTCTCGGAGGTA-1	10XE25	4168	1624	9	F_earlyRG1	F_earlyRG
E25_CACACTCTCGGTTCGG-1	10XE25	11046	3186	17	F_earlyRG2	F_earlyRG
E25_CACAGGCAGCTAGTTC-1	10XE25	9907	2999	17	F_earlyRG2	F_earlyRG
E25_CACAGGCAGCTGCGAA-1	10XE25	6898	2283	9	F_earlyRG1	F_earlyRG
E25_CACAGGCAGGACTGGT-1	10XE25	14267	4031	19	F_earlyRG3	F_earlyRG
E25_CACAGGCGTAGTACCT-1	10XE25	4191	1717	9	F_earlyRG1	F_earlyRG
E25_CACAGGCTCTAAGCCA-1	10XE25	7993	2561	9	F_earlyRG1	F_earlyRG
E25_CACAGTAAGCAAATCA-1	10XE25	8486	2427	11	F_Deep Layer	F_Deep Layer
E25_CACAGTAAGCTAGGCA-1	10XE25	8943	2741	9	F_earlyRG1	F_earlyRG
E25_CACAGTAAGGCATGTG-1	10XE25	8395	2448	9	F_earlyRG1	F_earlyRG
E25_CACAGTAAGGCTAGGT-1	10XE25	10084	2993	11	F_Deep Layer	F_Deep Layer
E25_CACAGTACACGAGAGT-1	10XE25	11699	3394	19	F_earlyRG3	F_earlyRG
E25_CACAGTACACTCGACG-1	10XE25	8229	2524	11	F_Deep Layer	F_Deep Layer
E25_CACAGTACAGGCTGAA-1	10XE25	11144	3163	19	F_earlyRG3	F_earlyRG
E25_CACAGTAGTGAGTGAC-1	10XE25	6747	2278	17	F_earlyRG2	F_earlyRG
E25_CACAGTAGTTGAGTTC-1	10XE25	10667	3148	11	F_Deep Layer	F_Deep Layer
E25_CACAGTATCTCCTATA-1	10XE25	14548	4041	19	F_earlyRG3	F_earlyRG
E25_CACAGTATCTGGAGCC-1	10XE25	9496	2788	11	F_Deep Layer	F_Deep Layer
E25_CACATAGAGATATGGT-1	10XE25	11393	3436	17	F_earlyRG2	F_earlyRG
E25_CACATAGAGTCGTACT-1	10XE25	11826	3256	17	F_earlyRG2	F_earlyRG
E25_CACATAGAGTGCTGCC-1	10XE25	6704	2564	19	F_earlyRG3	F_earlyRG
E25_CACATAGCACGTTGGC-1	10XE25	7020	2343	9	F_earlyRG1	F_earlyRG
E25_CACATAGGTAAGTAGT-1	10XE25	3290	1477	9	F_earlyRG1	F_earlyRG
E25_CACATAGGTCGAGTTT-1	10XE25	10473	3166	9	F_earlyRG1	F_earlyRG
E25_CACATAGGTTATCACG-1	10XE25	4781	1966	9	F_earlyRG1	F_earlyRG
E25_CACATAGTCAGCTCGG-1	10XE25	10440	3030	11	F_Deep Layer	F_Deep Layer
E25_CACATAGTCTCGCTTG-1	10XE25	6858	2153	9	F_earlyRG1	F_earlyRG
E25_CACATTTAGAGTCTGG-1	10XE25	5660	2194	19	F_earlyRG3	F_earlyRG
E25_CACATTTAGGACGAAA-1	10XE25	10988	3189	17	F_earlyRG2	F_earlyRG
E25_CACATTTAGGCAAAGA-1	10XE25	14313	3650	19	F_earlyRG3	F_earlyRG
E25_CACATTTCAAAGCGGT-1	10XE25	6618	364	25	F_unknown	F_unknown
E25_CACATTTCACATTTCT-1	10XE25	4792	1770	9	F_earlyRG1	F_earlyRG
E25_CACATTTGTAAGTGGC-1	10XE25	2812	1475	14	F_Upper Layer3	F_Upper Layer
E25_CACATTTGTTCGGGCT-1	10XE25	9614	3079	17	F_earlyRG2	F_earlyRG
E25_CACCACTAGCGCCTCA-1	10XE25	6093	1846	11	F_Deep Layer	F_Deep Layer
E25_CACCACTGTGGGTCAA-1	10XE25	4191	1548	9	F_earlyRG1	F_earlyRG
E25_CACCACTGTTACAGAA-1	10XE25	11055	3198	17	F_earlyRG2	F_earlyRG
E25_CACCAGGAGGTACTCT-1	10XE25	12063	3295	17	F_earlyRG2	F_earlyRG
E25_CACCAGGAGTTACGGG-1	10XE25	6791	2441	14	F_Upper Layer3	F_Upper Layer
E25_CACCAGGCAAGGACAC-1	10XE25	6235	2363	14	F_Upper Layer3	F_Upper Layer
E25_CACCAGGCAATGGACG-1	10XE25	6053	2188	19	F_earlyRG3	F_earlyRG
E25_CACCAGGCATCCGGGT-1	10XE25	6754	2342	9	F_earlyRG1	F_earlyRG
E25_CACCAGGCATTCTTAC-1	10XE25	10381	3206	16	F_IPC3	F_IPC
E25_CACCAGGGTCCCTACT-1	10XE25	4062	1801	11	F_Deep Layer	F_Deep Layer
E25_CACCAGGGTCCGACGT-1	10XE25	13912	3652	19	F_earlyRG3	F_earlyRG
E25_CACCAGGGTTAGAACA-1	10XE25	12792	3600	11	F_Deep Layer	F_Deep Layer
E25_CACCAGGTCGCTTGTC-1	10XE25	9623	2913	11	F_Deep Layer	F_Deep Layer
E25_CACCAGGTCGTTTGCC-1	10XE25	11239	3302	4	F_IPC2	F_IPC
E25_CACCAGGTCTGCAAGT-1	10XE25	2899	1362	9	F_earlyRG1	F_earlyRG
E25_CACCTTGAGAGGTTGC-1	10XE25	10587	3175	17	F_earlyRG2	F_earlyRG
E25_CACCTTGAGGGAAACA-1	10XE25	6555	2318	9	F_earlyRG1	F_earlyRG
E25_CACCTTGCACCGGAAA-1	10XE25	13102	3508	17	F_earlyRG2	F_earlyRG
E25_CACCTTGCAGCGATCC-1	10XE25	6034	2185	11	F_Deep Layer	F_Deep Layer
E25_CACCTTGCATTCTTAC-1	10XE25	6774	2567	9	F_earlyRG1	F_earlyRG
E25_CACCTTGTCACGCGGT-1	10XE25	9239	2778	9	F_earlyRG1	F_earlyRG
E25_CACCTTGTCATACGGT-1	10XE25	2880	1229	9	F_earlyRG1	F_earlyRG
E25_CACTCCAAGGCTAGGT-1	10XE25	13147	3462	19	F_earlyRG3	F_earlyRG
E25_CACTCCACAACGATCT-1	10XE25	6385	2288	9	F_earlyRG1	F_earlyRG
E25_CACTCCACAATGAAAC-1	10XE25	6867	2138	11	F_Deep Layer	F_Deep Layer
E25_CACTCCACACCGAAAG-1	10XE25	8694	2632	9	F_earlyRG1	F_earlyRG
E25_CACTCCACACGGTAGA-1	10XE25	13392	3627	24	F_Endothelial2	F_Endothelial
E25_CACTCCACATCCCACT-1	10XE25	7549	2464	11	F_Deep Layer	F_Deep Layer
E25_CACTCCAGTATGAATG-1	10XE25	7732	2307	11	F_Deep Layer	F_Deep Layer
E25_CACTCCATCGGAGGTA-1	10XE25	13027	3579	19	F_earlyRG3	F_earlyRG
E25_CAGAATCCATCACGAT-1	10XE25	8573	2636	9	F_earlyRG1	F_earlyRG
E25_CAGAATCTCAACACAC-1	10XE25	9016	2789	11	F_Deep Layer	F_Deep Layer
E25_CAGAATCTCCTTTACA-1	10XE25	6488	2282	9	F_earlyRG1	F_earlyRG
E25_CAGAATCTCTTAGCCC-1	10XE25	6099	2193	9	F_earlyRG1	F_earlyRG
E25_CAGAGAGCATCGGTTA-1	10XE25	7144	2766	11	F_Deep Layer	F_Deep Layer
E25_CAGAGAGGTCTAAAGA-1	10XE25	3066	1202	11	F_Deep Layer	F_Deep Layer
E25_CAGAGAGGTTCTGGTA-1	10XE25	19516	4025	9	F_earlyRG1	F_earlyRG
E25_CAGAGAGTCTGTTTGT-1	10XE25	3838	1554	11	F_Deep Layer	F_Deep Layer
E25_CAGAGAGTCTTTAGTC-1	10XE25	5751	2181	11	F_Deep Layer	F_Deep Layer
E25_CAGATCAAGGCTAGAC-1	10XE25	9583	2856	11	F_Deep Layer	F_Deep Layer
E25_CAGATCACAACACGCC-1	10XE25	5078	1914	11	F_Deep Layer	F_Deep Layer
E25_CAGATCACACAACGTT-1	10XE25	8580	2658	9	F_earlyRG1	F_earlyRG
E25_CAGATCAGTCTCATCC-1	10XE25	8205	2622	9	F_earlyRG1	F_earlyRG
E25_CAGATCAGTGTGCGTC-1	10XE25	5870	2128	17	F_earlyRG2	F_earlyRG
E25_CAGATCATCTAACTCT-1	10XE25	14503	3866	11	F_Deep Layer	F_Deep Layer
E25_CAGCAGCAGGTGATAT-1	10XE25	4830	1868	11	F_Deep Layer	F_Deep Layer
E25_CAGCAGCAGTAATCCC-1	10XE25	8088	2891	19	F_earlyRG3	F_earlyRG
E25_CAGCAGCCAGATTGCT-1	10XE25	7569	2226	11	F_Deep Layer	F_Deep Layer
E25_CAGCAGCCAGGAATCG-1	10XE25	8073	2386	9	F_earlyRG1	F_earlyRG
E25_CAGCAGCGTATAATGG-1	10XE25	11628	3322	19	F_earlyRG3	F_earlyRG
E25_CAGCAGCGTCGCTTCT-1	10XE25	3250	1383	9	F_earlyRG1	F_earlyRG
E25_CAGCAGCGTGGCGAAT-1	10XE25	1786	700	19	F_earlyRG3	F_earlyRG
E25_CAGCAGCGTGGGTCAA-1	10XE25	7346	2363	11	F_Deep Layer	F_Deep Layer
E25_CAGCAGCGTTCCTCCA-1	10XE25	12278	3465	11	F_Deep Layer	F_Deep Layer
E25_CAGCATAAGAGGTTGC-1	10XE25	8265	2457	11	F_Deep Layer	F_Deep Layer
E25_CAGCATAAGCCGTCGT-1	10XE25	9565	2672	9	F_earlyRG1	F_earlyRG
E25_CAGCATACACGGTGTC-1	10XE25	6561	2557	19	F_earlyRG3	F_earlyRG
E25_CAGCATAGTGTAACGG-1	10XE25	6648	2441	11	F_Deep Layer	F_Deep Layer
E25_CAGCATAGTTAGGGTG-1	10XE25	9612	2863	17	F_earlyRG2	F_earlyRG
E25_CAGCATATCAGTACGT-1	10XE25	10895	3139	17	F_earlyRG2	F_earlyRG
E25_CAGCATATCTTGAGAC-1	10XE25	3735	1557	9	F_earlyRG1	F_earlyRG
E25_CAGCCGACAGGGATTG-1	10XE25	12640	3257	11	F_Deep Layer	F_Deep Layer
E25_CAGCCGACATGCCACG-1	10XE25	14896	3717	19	F_earlyRG3	F_earlyRG
E25_CAGCCGACATGCTAGT-1	10XE25	5837	2079	9	F_earlyRG1	F_earlyRG
E25_CAGCCGATCACAGTAC-1	10XE25	2960	1428	9	F_earlyRG1	F_earlyRG
E25_CAGCCGATCCAAGTAC-1	10XE25	7944	2391	11	F_Deep Layer	F_Deep Layer
E25_CAGCCGATCCTAGAAC-1	10XE25	3066	1401	19	F_earlyRG3	F_earlyRG
E25_CAGCCGATCGCCTGTT-1	10XE25	7962	2739	17	F_earlyRG2	F_earlyRG
E25_CAGCCGATCTATCCCG-1	10XE25	15656	4018	19	F_earlyRG3	F_earlyRG
E25_CAGCCGATCTCTGTCG-1	10XE25	13066	3651	11	F_Deep Layer	F_Deep Layer
E25_CAGCCGATCTGAAAGA-1	10XE25	11200	3030	17	F_earlyRG2	F_earlyRG
E25_CAGCCGATCTTCATGT-1	10XE25	6760	2313	9	F_earlyRG1	F_earlyRG
E25_CAGCGACCAAGAGTCG-1	10XE25	11311	3304	17	F_earlyRG2	F_earlyRG
E25_CAGCGACCACCTATCC-1	10XE25	5690	2289	11	F_Deep Layer	F_Deep Layer
E25_CAGCGACCATGTCGAT-1	10XE25	3428	1533	9	F_earlyRG1	F_earlyRG
E25_CAGCTAAAGAAAGTGG-1	10XE25	7943	2763	16	F_IPC3	F_IPC
E25_CAGCTAAAGGTGTTAA-1	10XE25	9645	2831	9	F_earlyRG1	F_earlyRG
E25_CAGCTAAAGTCCAGGA-1	10XE25	10043	3038	17	F_earlyRG2	F_earlyRG
E25_CAGCTAACACGGTAAG-1	10XE25	6281	2141	11	F_Deep Layer	F_Deep Layer
E25_CAGCTAACAGTAACGG-1	10XE25	5280	1934	19	F_earlyRG3	F_earlyRG
E25_CAGCTAACATCCGTGG-1	10XE25	9618	2518	9	F_earlyRG1	F_earlyRG
E25_CAGCTAAGTATAGGGC-1	10XE25	7732	2398	11	F_Deep Layer	F_Deep Layer
E25_CAGCTAAGTCAACATC-1	10XE25	9031	2650	11	F_Deep Layer	F_Deep Layer
E25_CAGCTAAGTGTCCTCT-1	10XE25	7806	2589	11	F_Deep Layer	F_Deep Layer
E25_CAGCTGGCACTTCGAA-1	10XE25	13638	3720	19	F_earlyRG3	F_earlyRG
E25_CAGCTGGCAGCCTATA-1	10XE25	10488	2923	11	F_Deep Layer	F_Deep Layer
E25_CAGCTGGGTGGTACAG-1	10XE25	11681	3282	11	F_Deep Layer	F_Deep Layer
E25_CAGCTGGTCACCCTCA-1	10XE25	10139	3194	17	F_earlyRG2	F_earlyRG
E25_CAGCTGGTCCGTAGGC-1	10XE25	13708	3621	17	F_earlyRG2	F_earlyRG
E25_CAGCTGGTCTACCTGC-1	10XE25	11477	3197	11	F_Deep Layer	F_Deep Layer
E25_CAGCTGGTCTTCCTTC-1	10XE25	11942	3381	11	F_Deep Layer	F_Deep Layer
E25_CAGGTGCAGCTCTCGG-1	10XE25	3835	1603	11	F_Deep Layer	F_Deep Layer
E25_CAGGTGCAGTCAAGCG-1	10XE25	9500	2813	17	F_earlyRG2	F_earlyRG
E25_CAGGTGCCAACTTGAC-1	10XE25	2986	1128	11	F_Deep Layer	F_Deep Layer
E25_CAGGTGCCACATCTTT-1	10XE25	4531	1678	11	F_Deep Layer	F_Deep Layer
E25_CAGGTGCCATAGACTC-1	10XE25	12662	3380	17	F_earlyRG2	F_earlyRG
E25_CAGGTGCCATGCCACG-1	10XE25	9583	2978	4	F_IPC2	F_IPC
E25_CAGGTGCCATGTCTCC-1	10XE25	7247	2511	17	F_earlyRG2	F_earlyRG
E25_CAGGTGCGTCTGATCA-1	10XE25	3403	1602	11	F_Deep Layer	F_Deep Layer
E25_CAGGTGCTCCACGACG-1	10XE25	2083	979	11	F_Deep Layer	F_Deep Layer
E25_CAGTAACAGATGTTAG-1	10XE25	8713	2792	11	F_Deep Layer	F_Deep Layer
E25_CAGTAACAGTCAATAG-1	10XE25	9338	2820	9	F_earlyRG1	F_earlyRG
E25_CAGTAACCAATGGAAT-1	10XE25	9586	2592	9	F_earlyRG1	F_earlyRG
E25_CAGTAACCACGTCAGC-1	10XE25	7939	2849	19	F_earlyRG3	F_earlyRG
E25_CAGTAACGTGTTTGGT-1	10XE25	4456	1408	9	F_earlyRG1	F_earlyRG
E25_CAGTAACTCCTAGGGC-1	10XE25	13249	3488	17	F_earlyRG2	F_earlyRG
E25_CAGTCCTAGAAGGGTA-1	10XE25	2259	1010	9	F_earlyRG1	F_earlyRG
E25_CAGTCCTAGACTAGAT-1	10XE25	11230	3259	17	F_earlyRG2	F_earlyRG
E25_CAGTCCTAGCCACCTG-1	10XE25	6785	2329	11	F_Deep Layer	F_Deep Layer
E25_CAGTCCTAGGTGACCA-1	10XE25	10527	2951	17	F_earlyRG2	F_earlyRG
E25_CAGTCCTAGTGGTCCC-1	10XE25	10337	2831	9	F_earlyRG1	F_earlyRG
E25_CAGTCCTAGTTGTCGT-1	10XE25	7560	2460	9	F_earlyRG1	F_earlyRG
E25_CAGTCCTCAGATGAGC-1	10XE25	2908	1328	9	F_earlyRG1	F_earlyRG
E25_CAGTCCTCATATGCTG-1	10XE25	8940	2781	9	F_earlyRG1	F_earlyRG
E25_CAGTCCTGTCCGTGAC-1	10XE25	9193	2596	9	F_earlyRG1	F_earlyRG
E25_CAGTCCTGTTCCCGAG-1	10XE25	7277	2266	9	F_earlyRG1	F_earlyRG
E25_CAGTCCTGTTCGTTGA-1	10XE25	10217	3121	17	F_earlyRG2	F_earlyRG
E25_CAGTCCTGTTCTCATT-1	10XE25	10462	3047	11	F_Deep Layer	F_Deep Layer
E25_CAGTCCTTCGCAAGCC-1	10XE25	17379	4301	11	F_Deep Layer	F_Deep Layer
E25_CATATGGAGCTACCGC-1	10XE25	9730	2831	9	F_earlyRG1	F_earlyRG
E25_CATATGGAGGACAGCT-1	10XE25	2294	991	9	F_earlyRG1	F_earlyRG
E25_CATATGGAGTTGCAGG-1	10XE25	14961	3837	19	F_earlyRG3	F_earlyRG
E25_CATATGGCAAGCCTAT-1	10XE25	11549	3380	11	F_Deep Layer	F_Deep Layer
E25_CATATGGGTTGAACTC-1	10XE25	5650	2205	3	F_ITN	F_ITN
E25_CATATGGTCCCAAGTA-1	10XE25	11235	3541	11	F_Deep Layer	F_Deep Layer
E25_CATATGGTCCTAGTGA-1	10XE25	8178	2741	19	F_earlyRG3	F_earlyRG
E25_CATATGGTCTGTCAAG-1	10XE25	7620	2376	11	F_Deep Layer	F_Deep Layer
E25_CATATTCAGATGGCGT-1	10XE25	4354	1830	19	F_earlyRG3	F_earlyRG
E25_CATATTCAGCAGGCTA-1	10XE25	12203	3423	17	F_earlyRG2	F_earlyRG
E25_CATATTCAGCGCCTTG-1	10XE25	5184	1938	9	F_earlyRG1	F_earlyRG
E25_CATATTCAGCGCTCCA-1	10XE25	7863	2545	11	F_Deep Layer	F_Deep Layer
E25_CATATTCAGGTACTCT-1	10XE25	8130	2567	9	F_earlyRG1	F_earlyRG
E25_CATATTCAGTCATGCT-1	10XE25	12796	3456	9	F_earlyRG1	F_earlyRG
E25_CATATTCCACTCGACG-1	10XE25	10635	2895	9	F_earlyRG1	F_earlyRG
E25_CATATTCCAGACGCCT-1	10XE25	7689	2285	9	F_earlyRG1	F_earlyRG
E25_CATATTCTCTGACCTC-1	10XE25	11000	3329	17	F_earlyRG2	F_earlyRG
E25_CATCAAGAGGATATAC-1	10XE25	6388	2373	11	F_Deep Layer	F_Deep Layer
E25_CATCAAGCACGGTAAG-1	10XE25	4203	1603	9	F_earlyRG1	F_earlyRG
E25_CATCAAGCATGCGCAC-1	10XE25	12792	3420	11	F_Deep Layer	F_Deep Layer
E25_CATCAAGGTAGCGCTC-1	10XE25	6910	2337	9	F_earlyRG1	F_earlyRG
E25_CATCAAGTCCTAAGTG-1	10XE25	7135	2291	9	F_earlyRG1	F_earlyRG
E25_CATCAGAAGGAATCGC-1	10XE25	7800	2672	17	F_earlyRG2	F_earlyRG
E25_CATCAGACAATGGACG-1	10XE25	7843	2605	9	F_earlyRG1	F_earlyRG
E25_CATCAGACATACCATG-1	10XE25	6877	2128	11	F_Deep Layer	F_Deep Layer
E25_CATCAGACATGCCCGA-1	10XE25	8690	3007	14	F_Upper Layer3	F_Upper Layer
E25_CATCAGAGTACAGACG-1	10XE25	11969	3296	19	F_earlyRG3	F_earlyRG
E25_CATCAGAGTACGAAAT-1	10XE25	6999	2548	17	F_earlyRG2	F_earlyRG
E25_CATCAGAGTGAGGGTT-1	10XE25	2692	1210	11	F_Deep Layer	F_Deep Layer
E25_CATCAGAGTTCCAACA-1	10XE25	6795	2400	19	F_earlyRG3	F_earlyRG
E25_CATCAGAGTTCCACTC-1	10XE25	3256	1605	3	F_ITN	F_ITN
E25_CATCAGATCATCTGCC-1	10XE25	7695	2491	9	F_earlyRG1	F_earlyRG
E25_CATCAGATCCATGAGT-1	10XE25	10050	2622	9	F_earlyRG1	F_earlyRG
E25_CATCAGATCTATCCTA-1	10XE25	1952	643	9	F_earlyRG1	F_earlyRG
E25_CATCCACAGAGACTTA-1	10XE25	9610	2644	11	F_Deep Layer	F_Deep Layer
E25_CATCCACGTTGATTGC-1	10XE25	9027	2692	9	F_earlyRG1	F_earlyRG
E25_CATCCACTCACGAAGG-1	10XE25	9163	3032	19	F_earlyRG3	F_earlyRG
E25_CATCCACTCCGTAGTA-1	10XE25	10153	3177	19	F_earlyRG3	F_earlyRG
E25_CATCCACTCTCTGAGA-1	10XE25	9624	2926	17	F_earlyRG2	F_earlyRG
E25_CATCCACTCTTATCTG-1	10XE25	12067	3494	11	F_Deep Layer	F_Deep Layer
E25_CATCGAAAGCGCCTCA-1	10XE25	5335	1901	9	F_earlyRG1	F_earlyRG
E25_CATCGAAAGCTGATAA-1	10XE25	2671	1224	9	F_earlyRG1	F_earlyRG
E25_CATCGAAAGGCGATAC-1	10XE25	7861	2446	9	F_earlyRG1	F_earlyRG
E25_CATCGAACATAAGACA-1	10XE25	8446	2541	9	F_earlyRG1	F_earlyRG
E25_CATCGAAGTGGCGAAT-1	10XE25	11373	3214	11	F_Deep Layer	F_Deep Layer
E25_CATCGAATCACAGGCC-1	10XE25	15340	3885	16	F_IPC3	F_IPC
E25_CATCGGGAGATCGATA-1	10XE25	19594	4656	11	F_Deep Layer	F_Deep Layer
E25_CATCGGGAGCACAGGT-1	10XE25	9694	3069	17	F_earlyRG2	F_earlyRG
E25_CATCGGGAGCTAAACA-1	10XE25	7238	2216	11	F_Deep Layer	F_Deep Layer
E25_CATCGGGCAGATTGCT-1	10XE25	2385	1243	19	F_earlyRG3	F_earlyRG
E25_CATCGGGCAGTGAGTG-1	10XE25	2904	1434	9	F_earlyRG1	F_earlyRG
E25_CATGACAAGATCTGAA-1	10XE25	11122	3205	17	F_earlyRG2	F_earlyRG
E25_CATGACAAGCGTGAAC-1	10XE25	8372	2681	9	F_earlyRG1	F_earlyRG
E25_CATGACAGTAGGACAC-1	10XE25	7663	2567	19	F_earlyRG3	F_earlyRG
E25_CATGACAGTCCAAGTT-1	10XE25	9580	2918	17	F_earlyRG2	F_earlyRG
E25_CATGACATCGTTGCCT-1	10XE25	14193	731	25	F_unknown	F_unknown
E25_CATGCCTAGCGTTGCC-1	10XE25	9880	2974	17	F_earlyRG2	F_earlyRG
E25_CATGCCTAGTACCGGA-1	10XE25	6013	2146	11	F_Deep Layer	F_Deep Layer
E25_CATGCCTCAAGAAAGG-1	10XE25	10846	3097	17	F_earlyRG2	F_earlyRG
E25_CATGCCTCACATAACC-1	10XE25	8225	2521	9	F_earlyRG1	F_earlyRG
E25_CATGCCTGTACCTACA-1	10XE25	10221	3194	11	F_Deep Layer	F_Deep Layer
E25_CATGCCTGTCGCCATG-1	10XE25	7879	2623	9	F_earlyRG1	F_earlyRG
E25_CATGCCTGTTTCGCTC-1	10XE25	10403	2948	9	F_earlyRG1	F_earlyRG
E25_CATGCCTTCGGCGGTT-1	10XE25	5769	2114	9	F_earlyRG1	F_earlyRG
E25_CATGCCTTCTGCCCTA-1	10XE25	13014	3438	19	F_earlyRG3	F_earlyRG
E25_CATGGCGAGCTAAGAT-1	10XE25	11898	3472	19	F_earlyRG3	F_earlyRG
E25_CATGGCGCAACACCTA-1	10XE25	17392	4059	9	F_earlyRG1	F_earlyRG
E25_CATGGCGCACATCCGG-1	10XE25	14799	3911	19	F_earlyRG3	F_earlyRG
E25_CATGGCGCATTATCTC-1	10XE25	18630	4364	19	F_earlyRG3	F_earlyRG
E25_CATGGCGGTAAGAGGA-1	10XE25	12104	3127	17	F_earlyRG2	F_earlyRG
E25_CATGGCGGTGCGCTTG-1	10XE25	9336	2891	9	F_earlyRG1	F_earlyRG
E25_CATTATCAGAGCCCAA-1	10XE25	8328	2542	9	F_earlyRG1	F_earlyRG
E25_CATTATCCACCGCTAG-1	10XE25	16547	4210	19	F_earlyRG3	F_earlyRG
E25_CATTATCCACGAGGTA-1	10XE25	6747	2248	11	F_Deep Layer	F_Deep Layer
E25_CATTATCGTAGGGTAC-1	10XE25	3572	1475	19	F_earlyRG3	F_earlyRG
E25_CATTATCGTCTCCCTA-1	10XE25	12586	3709	9	F_earlyRG1	F_earlyRG
E25_CATTATCGTGATGTCT-1	10XE25	7324	2262	11	F_Deep Layer	F_Deep Layer
E25_CATTATCTCTTATCTG-1	10XE25	5127	2053	19	F_earlyRG3	F_earlyRG
E25_CATTCGCAGTTAGGTA-1	10XE25	11233	3145	9	F_earlyRG1	F_earlyRG
E25_CATTCGCCACTAGTAC-1	10XE25	7215	2391	11	F_Deep Layer	F_Deep Layer
E25_CATTCGCCACTTAACG-1	10XE25	7183	2395	11	F_Deep Layer	F_Deep Layer
E25_CATTCGCGTCACACGC-1	10XE25	14758	3874	19	F_earlyRG3	F_earlyRG
E25_CATTCGCGTTAGAACA-1	10XE25	3799	1520	11	F_Deep Layer	F_Deep Layer
E25_CATTCGCGTTCCCTTG-1	10XE25	7750	2758	9	F_earlyRG1	F_earlyRG
E25_CATTCGCTCCTCAACC-1	10XE25	9031	2680	11	F_Deep Layer	F_Deep Layer
E25_CATTCGCTCGCAAGCC-1	10XE25	5950	2204	9	F_earlyRG1	F_earlyRG
E25_CATTCGCTCTAGAGTC-1	10XE25	3156	1313	11	F_Deep Layer	F_Deep Layer
E25_CATTCGCTCTTAACCT-1	10XE25	13734	3588	17	F_earlyRG2	F_earlyRG
E25_CATTCGCTCTTAGAGC-1	10XE25	8037	2651	19	F_earlyRG3	F_earlyRG
E25_CCAATCCAGAAGGCCT-1	10XE25	11788	3413	11	F_Deep Layer	F_Deep Layer
E25_CCAATCCAGCCACCTG-1	10XE25	9232	2722	9	F_earlyRG1	F_earlyRG
E25_CCAATCCAGCGACGTA-1	10XE25	6586	2128	11	F_Deep Layer	F_Deep Layer
E25_CCAATCCCAACGCACC-1	10XE25	8226	2733	17	F_earlyRG2	F_earlyRG
E25_CCAATCCCAACTGCGC-1	10XE25	8381	2720	17	F_earlyRG2	F_earlyRG
E25_CCAATCCCAAGCTGGA-1	10XE25	9464	2898	17	F_earlyRG2	F_earlyRG
E25_CCAATCCCATATGAGA-1	10XE25	19170	4551	19	F_earlyRG3	F_earlyRG
E25_CCAATCCGTAAATGTG-1	10XE25	10077	3045	17	F_earlyRG2	F_earlyRG
E25_CCAATCCGTTGGTGGA-1	10XE25	3523	1453	11	F_Deep Layer	F_Deep Layer
E25_CCAATCCTCAGTTGAC-1	10XE25	9693	2888	11	F_Deep Layer	F_Deep Layer
E25_CCACCTAAGGTGCTTT-1	10XE25	11866	3406	17	F_earlyRG2	F_earlyRG
E25_CCACCTAAGTAGTGCG-1	10XE25	6512	2168	11	F_Deep Layer	F_Deep Layer
E25_CCACCTACAAGTACCT-1	10XE25	17332	4039	19	F_earlyRG3	F_earlyRG
E25_CCACCTACACGGTAGA-1	10XE25	8745	2651	9	F_earlyRG1	F_earlyRG
E25_CCACCTACATAAAGGT-1	10XE25	3238	1403	9	F_earlyRG1	F_earlyRG
E25_CCACCTATCTATCGCC-1	10XE25	11399	3516	17	F_earlyRG2	F_earlyRG
E25_CCACCTATCTTCTGGC-1	10XE25	8331	2799	9	F_earlyRG1	F_earlyRG
E25_CCACCTATCTTTAGGG-1	10XE25	10502	3173	11	F_Deep Layer	F_Deep Layer
E25_CCACGGACACCCAGTG-1	10XE25	7748	2485	17	F_earlyRG2	F_earlyRG
E25_CCACGGACACTGTGTA-1	10XE25	3477	1339	11	F_Deep Layer	F_Deep Layer
E25_CCACGGACAGCGTTCG-1	10XE25	3888	1742	19	F_earlyRG3	F_earlyRG
E25_CCACGGACATTCTTAC-1	10XE25	10296	3178	19	F_earlyRG3	F_earlyRG
E25_CCACGGAGTATAGTAG-1	10XE25	7597	2557	9	F_earlyRG1	F_earlyRG
E25_CCACGGAGTCGTCTTC-1	10XE25	7612	2356	9	F_earlyRG1	F_earlyRG
E25_CCACGGAGTTGGTAAA-1	10XE25	14300	3620	11	F_Deep Layer	F_Deep Layer
E25_CCACGGATCATTATCC-1	10XE25	8853	2734	9	F_earlyRG1	F_earlyRG
E25_CCACGGATCCGGCACA-1	10XE25	10739	3111	11	F_Deep Layer	F_Deep Layer
E25_CCACGGATCTTGTACT-1	10XE25	6196	2052	9	F_earlyRG1	F_earlyRG
E25_CCACTACAGTGAAGTT-1	10XE25	3059	1374	11	F_Deep Layer	F_Deep Layer
E25_CCACTACAGTGTACCT-1	10XE25	6075	2372	14	F_Upper Layer3	F_Upper Layer
E25_CCACTACCAGTGGAGT-1	10XE25	1973	892	11	F_Deep Layer	F_Deep Layer
E25_CCACTACGTGCACGAA-1	10XE25	2742	1193	11	F_Deep Layer	F_Deep Layer
E25_CCACTACTCCAAGCCG-1	10XE25	7059	2477	9	F_earlyRG1	F_earlyRG
E25_CCACTACTCGGCCGAT-1	10XE25	5981	2077	11	F_Deep Layer	F_Deep Layer
E25_CCAGCGAAGAACAATC-1	10XE25	8823	2748	11	F_Deep Layer	F_Deep Layer
E25_CCAGCGAAGTACGATA-1	10XE25	6777	2476	17	F_earlyRG2	F_earlyRG
E25_CCAGCGAAGTGCCAGA-1	10XE25	7693	2447	9	F_earlyRG1	F_earlyRG
E25_CCAGCGACATGTCGAT-1	10XE25	8465	2508	9	F_earlyRG1	F_earlyRG
E25_CCAGCGAGTCACTTCC-1	10XE25	13802	3540	19	F_earlyRG3	F_earlyRG
E25_CCAGCGAGTCCCGACA-1	10XE25	8035	2621	11	F_Deep Layer	F_Deep Layer
E25_CCAGCGATCCTAGTGA-1	10XE25	10391	3006	17	F_earlyRG2	F_earlyRG
E25_CCAGCGATCTGCAGTA-1	10XE25	2807	1336	11	F_Deep Layer	F_Deep Layer
E25_CCATGTCAGAAGGTTT-1	10XE25	11903	3349	11	F_Deep Layer	F_Deep Layer
E25_CCATGTCAGGGATACC-1	10XE25	7851	2329	11	F_Deep Layer	F_Deep Layer
E25_CCATGTCGTAAACGCG-1	10XE25	11543	3255	11	F_Deep Layer	F_Deep Layer
E25_CCATGTCGTGTGACCC-1	10XE25	4941	1907	17	F_earlyRG2	F_earlyRG
E25_CCATGTCGTGTGACGA-1	10XE25	13746	3647	19	F_earlyRG3	F_earlyRG
E25_CCATGTCGTTGCTCCT-1	10XE25	7623	2388	11	F_Deep Layer	F_Deep Layer
E25_CCATGTCTCTAGAGTC-1	10XE25	4543	1826	11	F_Deep Layer	F_Deep Layer
E25_CCATGTCTCTAGCACA-1	10XE25	9060	2772	9	F_earlyRG1	F_earlyRG
E25_CCATTCGAGAGCTTCT-1	10XE25	10903	3073	19	F_earlyRG3	F_earlyRG
E25_CCATTCGAGCTATGCT-1	10XE25	4783	1795	9	F_earlyRG1	F_earlyRG
E25_CCATTCGAGTTCGCAT-1	10XE25	7463	2237	9	F_earlyRG1	F_earlyRG
E25_CCATTCGGTGAGGCTA-1	10XE25	11049	3121	17	F_earlyRG2	F_earlyRG
E25_CCATTCGGTGGCTCCA-1	10XE25	8020	2372	9	F_earlyRG1	F_earlyRG
E25_CCATTCGGTGGTAACG-1	10XE25	3249	1338	9	F_earlyRG1	F_earlyRG
E25_CCATTCGGTTCCGTCT-1	10XE25	13089	3492	9	F_earlyRG1	F_earlyRG
E25_CCATTCGTCCGCGGTA-1	10XE25	10539	3127	17	F_earlyRG2	F_earlyRG
E25_CCCAATCAGACGCAAC-1	10XE25	7945	2681	9	F_earlyRG1	F_earlyRG
E25_CCCAATCAGCGTGAAC-1	10XE25	9368	2853	17	F_earlyRG2	F_earlyRG
E25_CCCAATCAGGGTGTTG-1	10XE25	7725	2457	9	F_earlyRG1	F_earlyRG
E25_CCCAATCCACGGTAAG-1	10XE25	5653	2043	17	F_earlyRG2	F_earlyRG
E25_CCCAATCCAGCCAGAA-1	10XE25	5104	2029	17	F_earlyRG2	F_earlyRG
E25_CCCAATCGTATTACCG-1	10XE25	6173	2241	9	F_earlyRG1	F_earlyRG
E25_CCCAATCGTGAGCGAT-1	10XE25	4605	1803	11	F_Deep Layer	F_Deep Layer
E25_CCCAATCTCTTCGGTC-1	10XE25	10808	2993	9	F_earlyRG1	F_earlyRG
E25_CCCAGTTAGCAGGCTA-1	10XE25	3774	1443	9	F_earlyRG1	F_earlyRG
E25_CCCAGTTAGCTACCGC-1	10XE25	9153	2749	9	F_earlyRG1	F_earlyRG
E25_CCCAGTTAGCTCTCGG-1	10XE25	9261	2723	9	F_earlyRG1	F_earlyRG
E25_CCCAGTTAGGCATGGT-1	10XE25	10755	3013	9	F_earlyRG1	F_earlyRG
E25_CCCAGTTTCCACGACG-1	10XE25	7645	2359	9	F_earlyRG1	F_earlyRG
E25_CCCAGTTTCCACGTTC-1	10XE25	13959	3737	19	F_earlyRG3	F_earlyRG
E25_CCCAGTTTCCATGAGT-1	10XE25	8332	2601	9	F_earlyRG1	F_earlyRG
E25_CCCAGTTTCTCGTTTA-1	10XE25	10453	3188	17	F_earlyRG2	F_earlyRG
E25_CCCATACCACGTGAGA-1	10XE25	8145	2543	9	F_earlyRG1	F_earlyRG
E25_CCCATACCACTGCCAG-1	10XE25	8787	2691	9	F_earlyRG1	F_earlyRG
E25_CCCATACCACTTAAGC-1	10XE25	4725	1825	19	F_earlyRG3	F_earlyRG
E25_CCCATACGTGCAACTT-1	10XE25	10884	3252	19	F_earlyRG3	F_earlyRG
E25_CCCATACTCTCAAGTG-1	10XE25	9605	2826	9	F_earlyRG1	F_earlyRG
E25_CCCTCCTAGACAGACC-1	10XE25	6134	2044	11	F_Deep Layer	F_Deep Layer
E25_CCCTCCTAGCCGCCTA-1	10XE25	6292	2261	9	F_earlyRG1	F_earlyRG
E25_CCCTCCTAGCTCCTTC-1	10XE25	3611	1386	11	F_Deep Layer	F_Deep Layer
E25_CCCTCCTCACAGACAG-1	10XE25	10538	3103	20	F_mural	F_mural
E25_CCCTCCTCAGTGGGAT-1	10XE25	7439	2463	11	F_Deep Layer	F_Deep Layer
E25_CCCTCCTGTAGCTCCG-1	10XE25	7798	2502	9	F_earlyRG1	F_earlyRG
E25_CCCTCCTGTCATATGC-1	10XE25	12518	3298	17	F_earlyRG2	F_earlyRG
E25_CCCTCCTTCACTCTTA-1	10XE25	5473	2067	3	F_ITN	F_ITN
E25_CCGGGATAGCGATTCT-1	10XE25	13150	3987	19	F_earlyRG3	F_earlyRG
E25_CCGGGATAGTCAATAG-1	10XE25	8075	2517	11	F_Deep Layer	F_Deep Layer
E25_CCGGGATAGTCATCCA-1	10XE25	4830	2002	17	F_earlyRG2	F_earlyRG
E25_CCGGGATCACGACGAA-1	10XE25	10587	2944	17	F_earlyRG2	F_earlyRG
E25_CCGGGATCAGGGTACA-1	10XE25	8754	2646	9	F_earlyRG1	F_earlyRG
E25_CCGGGATCAGTCGATT-1	10XE25	11747	3229	17	F_earlyRG2	F_earlyRG
E25_CCGGGATCATGCAACT-1	10XE25	10036	2814	9	F_earlyRG1	F_earlyRG
E25_CCGGGATGTCTGCAAT-1	10XE25	6473	2362	11	F_Deep Layer	F_Deep Layer
E25_CCGGGATGTGCTGTAT-1	10XE25	9690	2977	11	F_Deep Layer	F_Deep Layer
E25_CCGGGATGTGTGGCTC-1	10XE25	11653	3193	19	F_earlyRG3	F_earlyRG
E25_CCGGGATGTTAAGTAG-1	10XE25	8176	2684	17	F_earlyRG2	F_earlyRG
E25_CCGGGATTCAAGAAGT-1	10XE25	12321	3369	11	F_Deep Layer	F_Deep Layer
E25_CCGGGATTCAGGCGAA-1	10XE25	8410	2692	17	F_earlyRG2	F_earlyRG
E25_CCGGGATTCATAGCAC-1	10XE25	6968	2297	11	F_Deep Layer	F_Deep Layer
E25_CCGGGATTCATTCACT-1	10XE25	4473	1811	19	F_earlyRG3	F_earlyRG
E25_CCGGTAGAGGCATGGT-1	10XE25	9269	2820	17	F_earlyRG2	F_earlyRG
E25_CCGGTAGAGTTACCCA-1	10XE25	11928	3303	17	F_earlyRG2	F_earlyRG
E25_CCGGTAGGTAAGTAGT-1	10XE25	10360	3053	11	F_Deep Layer	F_Deep Layer
E25_CCGGTAGGTAGCTAAA-1	10XE25	13117	3358	9	F_earlyRG1	F_earlyRG
E25_CCGGTAGGTTACGCGC-1	10XE25	4896	1978	11	F_Deep Layer	F_Deep Layer
E25_CCGGTAGTCTCCCTGA-1	10XE25	8393	2993	11	F_Deep Layer	F_Deep Layer
E25_CCGGTAGTCTCCTATA-1	10XE25	13705	403	25	F_unknown	F_unknown
E25_CCGTACTAGTACACCT-1	10XE25	6965	2190	11	F_Deep Layer	F_Deep Layer
E25_CCGTACTCAAATACAG-1	10XE25	11183	3108	4	F_IPC2	F_IPC
E25_CCGTACTCAAGTACCT-1	10XE25	5458	2063	9	F_earlyRG1	F_earlyRG
E25_CCGTACTGTAGTGAAT-1	10XE25	6589	2170	11	F_Deep Layer	F_Deep Layer
E25_CCGTACTGTCACAAGG-1	10XE25	9914	3018	17	F_earlyRG2	F_earlyRG
E25_CCGTACTGTCGCCATG-1	10XE25	12814	3495	19	F_earlyRG3	F_earlyRG
E25_CCGTACTTCAGAGACG-1	10XE25	9804	3235	14	F_Upper Layer3	F_Upper Layer
E25_CCGTGGAAGCACACAG-1	10XE25	9010	2680	9	F_earlyRG1	F_earlyRG
E25_CCGTGGAAGCTTATCG-1	10XE25	11452	3080	11	F_Deep Layer	F_Deep Layer
E25_CCGTGGAAGGGCTTGA-1	10XE25	2769	1258	11	F_Deep Layer	F_Deep Layer
E25_CCGTGGACACGCCAGT-1	10XE25	2823	1213	9	F_earlyRG1	F_earlyRG
E25_CCGTGGACAGTCGTGC-1	10XE25	7340	2504	17	F_earlyRG2	F_earlyRG
E25_CCGTGGACAGTGAGTG-1	10XE25	8355	2732	11	F_Deep Layer	F_Deep Layer
E25_CCGTGGAGTAAGTGTA-1	10XE25	7177	2476	9	F_earlyRG1	F_earlyRG
E25_CCGTGGAGTCGTGGCT-1	10XE25	6473	2493	19	F_earlyRG3	F_earlyRG
E25_CCGTGGAGTGGTACAG-1	10XE25	9367	2877	11	F_Deep Layer	F_Deep Layer
E25_CCGTGGATCAGCTTAG-1	10XE25	2698	1162	9	F_earlyRG1	F_earlyRG
E25_CCGTGGATCCCTCTTT-1	10XE25	7079	2289	11	F_Deep Layer	F_Deep Layer
E25_CCGTTCAAGAAGGCCT-1	10XE25	8030	2619	9	F_earlyRG1	F_earlyRG
E25_CCGTTCAAGATGTTAG-1	10XE25	8270	2636	9	F_earlyRG1	F_earlyRG
E25_CCGTTCAAGCTAACAA-1	10XE25	11191	3177	11	F_Deep Layer	F_Deep Layer
E25_CCGTTCAAGGGATCTG-1	10XE25	6826	2260	11	F_Deep Layer	F_Deep Layer
E25_CCGTTCACAAGTACCT-1	10XE25	7326	2891	17	F_earlyRG2	F_earlyRG
E25_CCGTTCACAGCTGTAT-1	10XE25	5280	1986	9	F_earlyRG1	F_earlyRG
E25_CCGTTCAGTCATATCG-1	10XE25	7543	2342	11	F_Deep Layer	F_Deep Layer
E25_CCGTTCATCAAAGACA-1	10XE25	8504	2543	9	F_earlyRG1	F_earlyRG
E25_CCGTTCATCCAGTAGT-1	10XE25	6089	2006	11	F_Deep Layer	F_Deep Layer
E25_CCGTTCATCTCGATGA-1	10XE25	12369	3328	17	F_earlyRG2	F_earlyRG
E25_CCGTTCATCTTGCAAG-1	10XE25	8803	2709	17	F_earlyRG2	F_earlyRG
E25_CCTAAAGAGAATGTGT-1	10XE25	9983	2907	17	F_earlyRG2	F_earlyRG
E25_CCTAAAGCAACGCACC-1	10XE25	6292	2269	9	F_earlyRG1	F_earlyRG
E25_CCTAAAGGTCCAAGTT-1	10XE25	9434	2623	11	F_Deep Layer	F_Deep Layer
E25_CCTAAAGGTCTTGTCC-1	10XE25	5482	2076	4	F_IPC2	F_IPC
E25_CCTAAAGTCAGATAAG-1	10XE25	9342	2789	9	F_earlyRG1	F_earlyRG
E25_CCTAAAGTCGTCTGAA-1	10XE25	6729	2343	11	F_Deep Layer	F_Deep Layer
E25_CCTAAAGTCTCGGACG-1	10XE25	2778	1244	11	F_Deep Layer	F_Deep Layer
E25_CCTACACAGACCCACC-1	10XE25	5572	2155	9	F_earlyRG1	F_earlyRG
E25_CCTACACCAAGGGTCA-1	10XE25	13533	3731	11	F_Deep Layer	F_Deep Layer
E25_CCTACACCACGGACAA-1	10XE25	13248	3468	11	F_Deep Layer	F_Deep Layer
E25_CCTACACCAGGGTATG-1	10XE25	6815	2293	9	F_earlyRG1	F_earlyRG
E25_CCTACACGTACGACCC-1	10XE25	13558	3692	19	F_earlyRG3	F_earlyRG
E25_CCTACACGTGCCTGTG-1	10XE25	8243	2436	11	F_Deep Layer	F_Deep Layer
E25_CCTACACTCAACACAC-1	10XE25	13907	3727	11	F_Deep Layer	F_Deep Layer
E25_CCTACCAGTGGGTCAA-1	10XE25	6858	2356	14	F_Upper Layer3	F_Upper Layer
E25_CCTACCAGTGTCGCTG-1	10XE25	11411	3290	17	F_earlyRG2	F_earlyRG
E25_CCTACCATCAAGATCC-1	10XE25	6114	2294	14	F_Upper Layer3	F_Upper Layer
E25_CCTACCATCATGTAGC-1	10XE25	9765	2891	9	F_earlyRG1	F_earlyRG
E25_CCTAGCTAGGGCATGT-1	10XE25	10178	3110	11	F_Deep Layer	F_Deep Layer
E25_CCTAGCTCAACACGCC-1	10XE25	8440	2552	11	F_Deep Layer	F_Deep Layer
E25_CCTAGCTCAAGTCATC-1	10XE25	9572	2778	9	F_earlyRG1	F_earlyRG
E25_CCTAGCTCAGGGTTAG-1	10XE25	11297	3170	19	F_earlyRG3	F_earlyRG
E25_CCTAGCTCATTGCGGC-1	10XE25	8317	2797	11	F_Deep Layer	F_Deep Layer
E25_CCTAGCTGTCCAAGTT-1	10XE25	3077	1449	19	F_earlyRG3	F_earlyRG
E25_CCTAGCTTCGGCTTGG-1	10XE25	10333	3074	11	F_Deep Layer	F_Deep Layer
E25_CCTATTAAGACACTAA-1	10XE25	14366	3769	16	F_IPC3	F_IPC
E25_CCTATTAAGGAGTAGA-1	10XE25	10211	3071	11	F_Deep Layer	F_Deep Layer
E25_CCTATTAAGTCGTACT-1	10XE25	7298	2397	9	F_earlyRG1	F_earlyRG
E25_CCTATTACACAGGAGT-1	10XE25	9168	2606	9	F_earlyRG1	F_earlyRG
E25_CCTATTACAGACTCGC-1	10XE25	6414	2311	19	F_earlyRG3	F_earlyRG
E25_CCTATTACAGCATGAG-1	10XE25	12891	3389	11	F_Deep Layer	F_Deep Layer
E25_CCTATTACATTTGCCC-1	10XE25	13104	3612	19	F_earlyRG3	F_earlyRG
E25_CCTATTAGTTGCGCAC-1	10XE25	3512	1479	9	F_earlyRG1	F_earlyRG
E25_CCTATTATCAACACAC-1	10XE25	10340	2964	9	F_earlyRG1	F_earlyRG
E25_CCTATTATCTTCAACT-1	10XE25	18669	4678	11	F_Deep Layer	F_Deep Layer
E25_CCTATTATCTTGTACT-1	10XE25	6415	2347	19	F_earlyRG3	F_earlyRG
E25_CCTCAGTAGAAGATTC-1	10XE25	5405	1898	9	F_earlyRG1	F_earlyRG
E25_CCTCAGTCAACACCCG-1	10XE25	11521	3115	17	F_earlyRG2	F_earlyRG
E25_CCTCAGTCACAAGCCC-1	10XE25	1913	1046	14	F_Upper Layer3	F_Upper Layer
E25_CCTCAGTCACCGAATT-1	10XE25	9901	2830	9	F_earlyRG1	F_earlyRG
E25_CCTCAGTGTAAACGCG-1	10XE25	9334	2674	11	F_Deep Layer	F_Deep Layer
E25_CCTCAGTTCCGCAGTG-1	10XE25	7384	2421	11	F_Deep Layer	F_Deep Layer
E25_CCTCTGAAGAGGTTAT-1	10XE25	8005	2565	17	F_earlyRG2	F_earlyRG
E25_CCTCTGAAGGACACCA-1	10XE25	3576	1419	11	F_Deep Layer	F_Deep Layer
E25_CCTCTGAAGGATGGTC-1	10XE25	3031	1348	17	F_earlyRG2	F_earlyRG
E25_CCTCTGACACGGTAGA-1	10XE25	11630	3253	17	F_earlyRG2	F_earlyRG
E25_CCTCTGACAGCTGTGC-1	10XE25	8969	2700	19	F_earlyRG3	F_earlyRG
E25_CCTCTGACATCTCGCT-1	10XE25	6793	2232	9	F_earlyRG1	F_earlyRG
E25_CCTCTGAGTAGCGATG-1	10XE25	9118	2886	17	F_earlyRG2	F_earlyRG
E25_CCTCTGAGTCTGATCA-1	10XE25	11509	3432	19	F_earlyRG3	F_earlyRG
E25_CCTCTGAGTTCAACCA-1	10XE25	9902	2877	17	F_earlyRG2	F_earlyRG
E25_CCTCTGATCATTTGGG-1	10XE25	2828	1252	9	F_earlyRG1	F_earlyRG
E25_CCTTACGAGCGATATA-1	10XE25	9602	2813	9	F_earlyRG1	F_earlyRG
E25_CCTTACGAGCGTGAGT-1	10XE25	10078	3195	17	F_earlyRG2	F_earlyRG
E25_CCTTACGAGGCAAAGA-1	10XE25	23132	4952	11	F_Deep Layer	F_Deep Layer
E25_CCTTACGCAAGACACG-1	10XE25	9371	3012	17	F_earlyRG2	F_earlyRG
E25_CCTTACGCAAGCGATG-1	10XE25	10265	3174	19	F_earlyRG3	F_earlyRG
E25_CCTTACGGTCGCTTTC-1	10XE25	11941	3377	17	F_earlyRG2	F_earlyRG
E25_CCTTACGGTTGCGTTA-1	10XE25	17349	4264	19	F_earlyRG3	F_earlyRG
E25_CCTTACGGTTGTGGAG-1	10XE25	12144	3355	19	F_earlyRG3	F_earlyRG
E25_CCTTACGTCATTGCGA-1	10XE25	7968	2485	9	F_earlyRG1	F_earlyRG
E25_CCTTCCCAGGAATTAC-1	10XE25	9677	2761	9	F_earlyRG1	F_earlyRG
E25_CCTTCCCAGGTAGCCA-1	10XE25	9323	2929	19	F_earlyRG3	F_earlyRG
E25_CCTTCCCAGTACACCT-1	10XE25	2546	1070	9	F_earlyRG1	F_earlyRG
E25_CCTTCCCAGTACGTTC-1	10XE25	10787	3179	17	F_earlyRG2	F_earlyRG
E25_CCTTCCCAGTCCGGTC-1	10XE25	9585	3091	17	F_earlyRG2	F_earlyRG
E25_CCTTCCCCACACCGAC-1	10XE25	12260	3440	17	F_earlyRG2	F_earlyRG
E25_CCTTCCCCACCGATAT-1	10XE25	8261	2762	17	F_earlyRG2	F_earlyRG
E25_CCTTCCCCACTAGTAC-1	10XE25	7638	2711	9	F_earlyRG1	F_earlyRG
E25_CCTTCCCCAGATAATG-1	10XE25	11282	3040	17	F_earlyRG2	F_earlyRG
E25_CCTTCCCCATCCGTGG-1	10XE25	7434	2397	11	F_Deep Layer	F_Deep Layer
E25_CCTTCCCGTAGAAGGA-1	10XE25	7356	2443	19	F_earlyRG3	F_earlyRG
E25_CCTTCCCTCCAGAAGG-1	10XE25	10499	3168	9	F_earlyRG1	F_earlyRG
E25_CCTTCCCTCCCAACGG-1	10XE25	13224	3531	17	F_earlyRG2	F_earlyRG
E25_CCTTCCCTCTGCTGTC-1	10XE25	9712	3104	9	F_earlyRG1	F_earlyRG
E25_CCTTCGAAGAGTTGGC-1	10XE25	3042	1244	9	F_earlyRG1	F_earlyRG
E25_CCTTCGAAGCCCTAAT-1	10XE25	4177	1645	6	F_midRG	F_midRG
E25_CCTTCGAGTAAATACG-1	10XE25	13201	3661	11	F_Deep Layer	F_Deep Layer
E25_CCTTCGAGTCGAAAGC-1	10XE25	11439	3154	19	F_earlyRG3	F_earlyRG
E25_CCTTCGAGTTCCAACA-1	10XE25	11182	3006	9	F_earlyRG1	F_earlyRG
E25_CCTTCGATCAGAGGTG-1	10XE25	9836	2852	11	F_Deep Layer	F_Deep Layer
E25_CCTTCGATCCGTCAAA-1	10XE25	8153	2631	9	F_earlyRG1	F_earlyRG
E25_CCTTCGATCGAACGGA-1	10XE25	5441	2045	17	F_earlyRG2	F_earlyRG
E25_CCTTTCTAGTCAATAG-1	10XE25	8235	2573	9	F_earlyRG1	F_earlyRG
E25_CCTTTCTCAGGATTGG-1	10XE25	6446	2469	19	F_earlyRG3	F_earlyRG
E25_CCTTTCTTCTGAAAGA-1	10XE25	8856	2929	9	F_earlyRG1	F_earlyRG
E25_CCTTTCTTCTTCATGT-1	10XE25	9408	2890	9	F_earlyRG1	F_earlyRG
E25_CGAACATAGTGAACGC-1	10XE25	4222	1652	9	F_earlyRG1	F_earlyRG
E25_CGAACATCAGACTCGC-1	10XE25	9667	2761	9	F_earlyRG1	F_earlyRG
E25_CGAACATCATCTCCCA-1	10XE25	7723	2596	9	F_earlyRG1	F_earlyRG
E25_CGAACATGTATGGTTC-1	10XE25	6987	2372	9	F_earlyRG1	F_earlyRG
E25_CGAACATGTCACTTCC-1	10XE25	7558	2459	9	F_earlyRG1	F_earlyRG
E25_CGAACATGTCGACTGC-1	10XE25	9950	2376	11	F_Deep Layer	F_Deep Layer
E25_CGAACATGTGATGTGG-1	10XE25	6823	2222	9	F_earlyRG1	F_earlyRG
E25_CGAACATGTTAGATGA-1	10XE25	9427	2901	9	F_earlyRG1	F_earlyRG
E25_CGAACATGTTCGGCAC-1	10XE25	7869	2592	9	F_earlyRG1	F_earlyRG
E25_CGAACATTCCGAGCCA-1	10XE25	8517	2598	9	F_earlyRG1	F_earlyRG
E25_CGAACATTCTGTCTAT-1	10XE25	8067	2517	9	F_earlyRG1	F_earlyRG
E25_CGAATGTAGATCGATA-1	10XE25	11539	3176	9	F_earlyRG1	F_earlyRG
E25_CGAATGTAGGATGGTC-1	10XE25	9719	2927	19	F_earlyRG3	F_earlyRG
E25_CGAATGTCAATGGAAT-1	10XE25	11850	3135	9	F_earlyRG1	F_earlyRG
E25_CGAATGTCAGCTGTGC-1	10XE25	8081	2545	9	F_earlyRG1	F_earlyRG
E25_CGAATGTCATCTCCCA-1	10XE25	4475	1768	11	F_Deep Layer	F_Deep Layer
E25_CGAATGTGTGCAGACA-1	10XE25	7339	2493	9	F_earlyRG1	F_earlyRG
E25_CGAATGTGTTGGTAAA-1	10XE25	4893	1952	17	F_earlyRG2	F_earlyRG
E25_CGACCTTAGATGCCTT-1	10XE25	10116	2808	9	F_earlyRG1	F_earlyRG
E25_CGACCTTAGGCCCTCA-1	10XE25	10477	3102	11	F_Deep Layer	F_Deep Layer
E25_CGACCTTAGTGATCGG-1	10XE25	10537	3066	17	F_earlyRG2	F_earlyRG
E25_CGACCTTCAAATACAG-1	10XE25	7849	2593	11	F_Deep Layer	F_Deep Layer
E25_CGACCTTCACAGACAG-1	10XE25	8987	2730	17	F_earlyRG2	F_earlyRG
E25_CGACCTTCACGAGGTA-1	10XE25	10135	3147	11	F_Deep Layer	F_Deep Layer
E25_CGACCTTCACGTTGGC-1	10XE25	9094	2710	9	F_earlyRG1	F_earlyRG
E25_CGACCTTCAGCCACCA-1	10XE25	6076	2112	9	F_earlyRG1	F_earlyRG
E25_CGACCTTCATAGTAAG-1	10XE25	9791	2726	9	F_earlyRG1	F_earlyRG
E25_CGACCTTGTTCGTTGA-1	10XE25	2263	1067	14	F_Upper Layer3	F_Upper Layer
E25_CGACCTTTCATTCACT-1	10XE25	9884	2878	9	F_earlyRG1	F_earlyRG
E25_CGACCTTTCGTGACAT-1	10XE25	6870	2150	9	F_earlyRG1	F_earlyRG
E25_CGACCTTTCTGCTGTC-1	10XE25	8221	2610	11	F_Deep Layer	F_Deep Layer
E25_CGACTTCAGATGTCGG-1	10XE25	12259	3260	17	F_earlyRG2	F_earlyRG
E25_CGACTTCCAAGCGATG-1	10XE25	13233	3637	19	F_earlyRG3	F_earlyRG
E25_CGAGAAGAGAGAACAG-1	10XE25	10390	2990	9	F_earlyRG1	F_earlyRG
E25_CGAGAAGAGAGGTACC-1	10XE25	9780	2898	9	F_earlyRG1	F_earlyRG
E25_CGAGAAGAGGATGCGT-1	10XE25	6947	2279	11	F_Deep Layer	F_Deep Layer
E25_CGAGAAGAGTGATCGG-1	10XE25	6273	2252	11	F_Deep Layer	F_Deep Layer
E25_CGAGAAGCACGGCCAT-1	10XE25	7284	2490	9	F_earlyRG1	F_earlyRG
E25_CGAGAAGCATTATCTC-1	10XE25	9093	2588	9	F_earlyRG1	F_earlyRG
E25_CGAGAAGGTTGATTGC-1	10XE25	3484	1453	4	F_IPC2	F_IPC
E25_CGAGAAGTCATCATTC-1	10XE25	2613	1204	9	F_earlyRG1	F_earlyRG
E25_CGAGCACAGACAGACC-1	10XE25	6239	2211	9	F_earlyRG1	F_earlyRG
E25_CGAGCACCATCCTTGC-1	10XE25	8940	2600	11	F_Deep Layer	F_Deep Layer
E25_CGAGCACGTGCTCTTC-1	10XE25	8613	2909	11	F_Deep Layer	F_Deep Layer
E25_CGAGCACGTTTGACAC-1	10XE25	11960	3500	19	F_earlyRG3	F_earlyRG
E25_CGAGCACTCATTCACT-1	10XE25	5426	1919	11	F_Deep Layer	F_Deep Layer
E25_CGAGCACTCCCTTGTG-1	10XE25	2971	1307	11	F_Deep Layer	F_Deep Layer
E25_CGAGCACTCTCGGACG-1	10XE25	11113	2982	9	F_earlyRG1	F_earlyRG
E25_CGAGCCAAGGATGGAA-1	10XE25	8502	2457	9	F_earlyRG1	F_earlyRG
E25_CGAGCCACACCAACCG-1	10XE25	11516	3289	17	F_earlyRG2	F_earlyRG
E25_CGAGCCACACCAGGCT-1	10XE25	12481	3319	9	F_earlyRG1	F_earlyRG
E25_CGAGCCACAGAAGCAC-1	10XE25	11391	3223	11	F_Deep Layer	F_Deep Layer
E25_CGAGCCAGTAAGGGCT-1	10XE25	9485	2634	9	F_earlyRG1	F_earlyRG
E25_CGAGCCAGTTATCACG-1	10XE25	14183	3725	19	F_earlyRG3	F_earlyRG
E25_CGATCGGAGACTAAGT-1	10XE25	11374	3330	11	F_Deep Layer	F_Deep Layer
E25_CGATCGGAGAGACTTA-1	10XE25	9221	2865	17	F_earlyRG2	F_earlyRG
E25_CGATCGGAGATAGGAG-1	10XE25	9322	2866	9	F_earlyRG1	F_earlyRG
E25_CGATCGGAGGCGTACA-1	10XE25	9046	2834	9	F_earlyRG1	F_earlyRG
E25_CGATCGGAGTCTCCTC-1	10XE25	4120	1882	11	F_Deep Layer	F_Deep Layer
E25_CGATCGGAGTTTCCTT-1	10XE25	12139	3398	17	F_earlyRG2	F_earlyRG
E25_CGATCGGCAAGTCATC-1	10XE25	11734	3165	11	F_Deep Layer	F_Deep Layer
E25_CGATCGGCATGTCTCC-1	10XE25	8698	2849	19	F_earlyRG3	F_earlyRG
E25_CGATCGGGTAGCGTAG-1	10XE25	17284	4348	17	F_earlyRG2	F_earlyRG
E25_CGATCGGGTCCGTGAC-1	10XE25	10620	3054	4	F_IPC2	F_IPC
E25_CGATCGGGTGTGAATA-1	10XE25	7312	2403	9	F_earlyRG1	F_earlyRG
E25_CGATCGGTCCTGCAGG-1	10XE25	8435	2667	9	F_earlyRG1	F_earlyRG
E25_CGATCGGTCGTATCAG-1	10XE25	9142	2724	9	F_earlyRG1	F_earlyRG
E25_CGATGGCAGACTTTCG-1	10XE25	8499	2719	9	F_earlyRG1	F_earlyRG
E25_CGATGGCGTACCGAGA-1	10XE25	8659	2950	17	F_earlyRG2	F_earlyRG
E25_CGATGGCGTGCGGTAA-1	10XE25	6936	2221	11	F_Deep Layer	F_Deep Layer
E25_CGATGGCGTGTATGGG-1	10XE25	7627	2545	11	F_Deep Layer	F_Deep Layer
E25_CGATGGCTCGTGGACC-1	10XE25	8010	2731	17	F_earlyRG2	F_earlyRG
E25_CGATGGCTCTCTAGGA-1	10XE25	8950	2840	9	F_earlyRG1	F_earlyRG
E25_CGATGTACAGTGAGTG-1	10XE25	3576	1546	17	F_earlyRG2	F_earlyRG
E25_CGATGTATCCCAAGTA-1	10XE25	9383	2889	11	F_Deep Layer	F_Deep Layer
E25_CGATGTATCGCTTGTC-1	10XE25	11172	3154	11	F_Deep Layer	F_Deep Layer
E25_CGATGTATCTAACGGT-1	10XE25	11755	3444	11	F_Deep Layer	F_Deep Layer
E25_CGATTGACAATACGCT-1	10XE25	3665	1378	9	F_earlyRG1	F_earlyRG
E25_CGATTGACACACATGT-1	10XE25	12969	3744	19	F_earlyRG3	F_earlyRG
E25_CGATTGACAGGTCCAC-1	10XE25	9549	2948	17	F_earlyRG2	F_earlyRG
E25_CGATTGACATCCTTGC-1	10XE25	6339	2278	9	F_earlyRG1	F_earlyRG
E25_CGATTGAGTAAGTTCC-1	10XE25	8166	2730	19	F_earlyRG3	F_earlyRG
E25_CGATTGAGTTTGTTTC-1	10XE25	6270	2334	19	F_earlyRG3	F_earlyRG
E25_CGCCAAGAGCATCATC-1	10XE25	6765	2385	11	F_Deep Layer	F_Deep Layer
E25_CGCCAAGGTAAGTAGT-1	10XE25	6704	2408	19	F_earlyRG3	F_earlyRG
E25_CGCCAAGGTACCATCA-1	10XE25	8753	2767	11	F_Deep Layer	F_Deep Layer
E25_CGCCAAGGTCATATCG-1	10XE25	6286	2088	11	F_Deep Layer	F_Deep Layer
E25_CGCGGTAAGAGTGACC-1	10XE25	8577	2753	19	F_earlyRG3	F_earlyRG
E25_CGCGGTAAGGATTCGG-1	10XE25	2526	1049	9	F_earlyRG1	F_earlyRG
E25_CGCGGTACAACACCTA-1	10XE25	6937	2254	11	F_Deep Layer	F_Deep Layer
E25_CGCGGTAGTTAAAGAC-1	10XE25	8707	2715	9	F_earlyRG1	F_earlyRG
E25_CGCGGTAGTTTGTTGG-1	10XE25	4900	2009	11	F_Deep Layer	F_Deep Layer
E25_CGCGGTATCCTTCAAT-1	10XE25	5276	2071	9	F_earlyRG1	F_earlyRG
E25_CGCGGTATCGTCCAGG-1	10XE25	9856	2968	11	F_Deep Layer	F_Deep Layer
E25_CGCGTTTAGACAAGCC-1	10XE25	9167	2915	17	F_earlyRG2	F_earlyRG
E25_CGCGTTTAGATGCCTT-1	10XE25	4096	1672	17	F_earlyRG2	F_earlyRG
E25_CGCGTTTAGCGACGTA-1	10XE25	6543	2250	9	F_earlyRG1	F_earlyRG
E25_CGCGTTTAGCGGATCA-1	10XE25	6516	2308	9	F_earlyRG1	F_earlyRG
E25_CGCGTTTCAGGTTTCA-1	10XE25	6335	2165	17	F_earlyRG2	F_earlyRG
E25_CGCGTTTCATGCTGGC-1	10XE25	8934	2690	9	F_earlyRG1	F_earlyRG
E25_CGCGTTTGTTGAACTC-1	10XE25	8196	2602	9	F_earlyRG1	F_earlyRG
E25_CGCGTTTTCCCATTTA-1	10XE25	11749	3294	11	F_Deep Layer	F_Deep Layer
E25_CGCGTTTTCTCTGAGA-1	10XE25	4654	1849	11	F_Deep Layer	F_Deep Layer
E25_CGCTATCAGTGTTGAA-1	10XE25	10469	2995	17	F_earlyRG2	F_earlyRG
E25_CGCTATCGTGAAGGCT-1	10XE25	2629	1199	9	F_earlyRG1	F_earlyRG
E25_CGCTATCTCCTTGCCA-1	10XE25	6322	2487	17	F_earlyRG2	F_earlyRG
E25_CGCTGGACAAGCGTAG-1	10XE25	11387	3185	17	F_earlyRG2	F_earlyRG
E25_CGCTGGAGTCCAGTTA-1	10XE25	7784	2307	11	F_Deep Layer	F_Deep Layer
E25_CGCTGGAGTGCACTTA-1	10XE25	4571	1812	11	F_Deep Layer	F_Deep Layer
E25_CGCTGGATCCACGACG-1	10XE25	4412	1692	9	F_earlyRG1	F_earlyRG
E25_CGCTTCAAGGTAGCCA-1	10XE25	7503	2286	9	F_earlyRG1	F_earlyRG
E25_CGCTTCATCCACGAAT-1	10XE25	11574	3309	11	F_Deep Layer	F_Deep Layer
E25_CGCTTCATCCCTCTTT-1	10XE25	7199	2439	11	F_Deep Layer	F_Deep Layer
E25_CGGACACAGACAAGCC-1	10XE25	2847	1188	11	F_Deep Layer	F_Deep Layer
E25_CGGACACAGCTGGAAC-1	10XE25	9987	3023	4	F_IPC2	F_IPC
E25_CGGACACCAGTCAGAG-1	10XE25	7723	2751	19	F_earlyRG3	F_earlyRG
E25_CGGACACCATTTGCTT-1	10XE25	12355	3376	17	F_earlyRG2	F_earlyRG
E25_CGGACACGTAAACCTC-1	10XE25	8060	2607	9	F_earlyRG1	F_earlyRG
E25_CGGACACGTACTCTCC-1	10XE25	5944	2119	9	F_earlyRG1	F_earlyRG
E25_CGGACACGTCAAAGAT-1	10XE25	3744	1803	19	F_earlyRG3	F_earlyRG
E25_CGGACACGTTTGACAC-1	10XE25	3794	1582	9	F_earlyRG1	F_earlyRG
E25_CGGACACTCAGGCCCA-1	10XE25	8315	2565	9	F_earlyRG1	F_earlyRG
E25_CGGACACTCGACAGCC-1	10XE25	6509	2297	14	F_Upper Layer3	F_Upper Layer
E25_CGGACACTCGTTTAGG-1	10XE25	3692	1683	17	F_earlyRG2	F_earlyRG
E25_CGGACGTCAGTCAGAG-1	10XE25	11657	3187	17	F_earlyRG2	F_earlyRG
E25_CGGACGTGTCTAGTGT-1	10XE25	6145	2147	9	F_earlyRG1	F_earlyRG
E25_CGGACGTTCACGAAGG-1	10XE25	9138	2778	11	F_Deep Layer	F_Deep Layer
E25_CGGACGTTCACGACTA-1	10XE25	3859	1433	9	F_earlyRG1	F_earlyRG
E25_CGGACGTTCAGTACGT-1	10XE25	6540	2388	9	F_earlyRG1	F_earlyRG
E25_CGGACGTTCCTTTCTC-1	10XE25	14477	3662	19	F_earlyRG3	F_earlyRG
E25_CGGACGTTCTACTCAT-1	10XE25	10872	3368	17	F_earlyRG2	F_earlyRG
E25_CGGACTGAGACAGGCT-1	10XE25	7070	2590	11	F_Deep Layer	F_Deep Layer
E25_CGGACTGAGCGAGAAA-1	10XE25	11209	3384	11	F_Deep Layer	F_Deep Layer
E25_CGGACTGAGGCTCAGA-1	10XE25	2457	1054	11	F_Deep Layer	F_Deep Layer
E25_CGGACTGCAAATACAG-1	10XE25	8832	2583	9	F_earlyRG1	F_earlyRG
E25_CGGACTGCAGTGGGAT-1	10XE25	12545	3493	19	F_earlyRG3	F_earlyRG
E25_CGGACTGGTGCAGACA-1	10XE25	9500	2797	11	F_Deep Layer	F_Deep Layer
E25_CGGACTGGTTGCGCAC-1	10XE25	13027	3434	11	F_Deep Layer	F_Deep Layer
E25_CGGACTGTCGTAGGTT-1	10XE25	6668	2389	11	F_Deep Layer	F_Deep Layer
E25_CGGACTGTCTTGCCGT-1	10XE25	9224	2715	9	F_earlyRG1	F_earlyRG
E25_CGGAGCTGTCTAGTGT-1	10XE25	9526	2744	9	F_earlyRG1	F_earlyRG
E25_CGGAGCTTCCGGCACA-1	10XE25	7623	2706	16	F_IPC3	F_IPC
E25_CGGAGTCAGCTCTCGG-1	10XE25	10981	3134	17	F_earlyRG2	F_earlyRG
E25_CGGAGTCAGGTCATCT-1	10XE25	6063	2149	9	F_earlyRG1	F_earlyRG
E25_CGGAGTCCACCCAGTG-1	10XE25	9179	2851	9	F_earlyRG1	F_earlyRG
E25_CGGAGTCCATACTCTT-1	10XE25	10821	3106	17	F_earlyRG2	F_earlyRG
E25_CGGAGTCGTTAGAACA-1	10XE25	10816	2872	9	F_earlyRG1	F_earlyRG
E25_CGGAGTCTCCGCGCAA-1	10XE25	3472	1324	11	F_Deep Layer	F_Deep Layer
E25_CGGCTAGAGCCCGAAA-1	10XE25	12770	3473	11	F_Deep Layer	F_Deep Layer
E25_CGGCTAGCAAACTGCT-1	10XE25	10408	2973	9	F_earlyRG1	F_earlyRG
E25_CGGCTAGCAAGCCATT-1	10XE25	7566	2354	11	F_Deep Layer	F_Deep Layer
E25_CGGCTAGCACAACGCC-1	10XE25	6613	2476	9	F_earlyRG1	F_earlyRG
E25_CGGCTAGCATAGACTC-1	10XE25	6622	2396	4	F_IPC2	F_IPC
E25_CGGCTAGGTGTAACGG-1	10XE25	7759	2543	9	F_earlyRG1	F_earlyRG
E25_CGGCTAGTCATCTGTT-1	10XE25	14018	3785	19	F_earlyRG3	F_earlyRG
E25_CGGCTAGTCGTTGCCT-1	10XE25	12086	3523	19	F_earlyRG3	F_earlyRG
E25_CGGCTAGTCGTTTGCC-1	10XE25	7652	2699	14	F_Upper Layer3	F_Upper Layer
E25_CGGGTCAAGAATCTCC-1	10XE25	5802	1930	11	F_Deep Layer	F_Deep Layer
E25_CGGGTCAAGCTTCGCG-1	10XE25	4591	1860	9	F_earlyRG1	F_earlyRG
E25_CGGGTCAAGGTAAACT-1	10XE25	6644	2399	9	F_earlyRG1	F_earlyRG
E25_CGGGTCACACACAGAG-1	10XE25	8810	2859	17	F_earlyRG2	F_earlyRG
E25_CGGGTCACACGAAACG-1	10XE25	6811	2338	9	F_earlyRG1	F_earlyRG
E25_CGGGTCACAGATCCAT-1	10XE25	9434	2766	9	F_earlyRG1	F_earlyRG
E25_CGGGTCATCCACTGGG-1	10XE25	6395	2534	19	F_earlyRG3	F_earlyRG
E25_CGGTTAAAGATCCTGT-1	10XE25	5225	2127	14	F_Upper Layer3	F_Upper Layer
E25_CGGTTAACAGACAGGT-1	10XE25	9819	2975	11	F_Deep Layer	F_Deep Layer
E25_CGGTTAACAGCCTTGG-1	10XE25	11711	3196	9	F_earlyRG1	F_earlyRG
E25_CGGTTAAGTATATGAG-1	10XE25	8127	2576	11	F_Deep Layer	F_Deep Layer
E25_CGGTTAATCACATGCA-1	10XE25	1928	946	9	F_earlyRG1	F_earlyRG
E25_CGGTTAATCGCATGGC-1	10XE25	7457	2384	11	F_Deep Layer	F_Deep Layer
E25_CGTAGCGAGCCGCCTA-1	10XE25	10643	2943	17	F_earlyRG2	F_earlyRG
E25_CGTAGCGAGGAGTTTA-1	10XE25	11451	3237	17	F_earlyRG2	F_earlyRG
E25_CGTAGCGAGTACGCGA-1	10XE25	12849	3386	19	F_earlyRG3	F_earlyRG
E25_CGTAGCGCACCACCAG-1	10XE25	11891	3224	9	F_earlyRG1	F_earlyRG
E25_CGTAGCGCATCCGTGG-1	10XE25	5687	2146	9	F_earlyRG1	F_earlyRG
E25_CGTAGCGCATCCTAGA-1	10XE25	10206	2953	9	F_earlyRG1	F_earlyRG
E25_CGTAGCGGTATCTGCA-1	10XE25	2412	1166	9	F_earlyRG1	F_earlyRG
E25_CGTAGCGGTGTCCTCT-1	10XE25	9307	2918	9	F_earlyRG1	F_earlyRG
E25_CGTAGCGTCCTAGTGA-1	10XE25	9304	2736	11	F_Deep Layer	F_Deep Layer
E25_CGTAGCGTCGCATGAT-1	10XE25	9801	3081	17	F_earlyRG2	F_earlyRG
E25_CGTAGGCAGACCACGA-1	10XE25	12438	3273	17	F_earlyRG2	F_earlyRG
E25_CGTAGGCAGAGACTTA-1	10XE25	10337	3160	17	F_earlyRG2	F_earlyRG
E25_CGTAGGCCACTCAGGC-1	10XE25	7790	2571	11	F_Deep Layer	F_Deep Layer
E25_CGTAGGCCATCGGAAG-1	10XE25	6345	2200	17	F_earlyRG2	F_earlyRG
E25_CGTAGGCGTAAGTGGC-1	10XE25	7076	2219	11	F_Deep Layer	F_Deep Layer
E25_CGTAGGCTCAATCTCT-1	10XE25	6663	2503	11	F_Deep Layer	F_Deep Layer
E25_CGTAGGCTCGTCACGG-1	10XE25	7360	2350	9	F_earlyRG1	F_earlyRG
E25_CGTCACTAGAGACGAA-1	10XE25	11113	3327	19	F_earlyRG3	F_earlyRG
E25_CGTCACTAGCCGTCGT-1	10XE25	14250	3727	19	F_earlyRG3	F_earlyRG
E25_CGTCACTCAGATGGCA-1	10XE25	2919	1324	9	F_earlyRG1	F_earlyRG
E25_CGTCACTCAGGTGGAT-1	10XE25	11097	3316	11	F_Deep Layer	F_Deep Layer
E25_CGTCACTGTATATGAG-1	10XE25	5198	2088	19	F_earlyRG3	F_earlyRG
E25_CGTCACTGTCTTCAAG-1	10XE25	12951	3502	19	F_earlyRG3	F_earlyRG
E25_CGTCACTGTGTTTGGT-1	10XE25	9817	2757	9	F_earlyRG1	F_earlyRG
E25_CGTCACTTCCAAAGTC-1	10XE25	8364	2679	9	F_earlyRG1	F_earlyRG
E25_CGTCACTTCCTTGGTC-1	10XE25	3803	1438	11	F_Deep Layer	F_Deep Layer
E25_CGTCAGGAGAGCCCAA-1	10XE25	13238	3738	11	F_Deep Layer	F_Deep Layer
E25_CGTCAGGCAATGGTCT-1	10XE25	7032	2387	11	F_Deep Layer	F_Deep Layer
E25_CGTCAGGCAGCCAGAA-1	10XE25	2676	1088	9	F_earlyRG1	F_earlyRG
E25_CGTCAGGGTCTAAAGA-1	10XE25	9844	2924	9	F_earlyRG1	F_earlyRG
E25_CGTCAGGTCCCTCAGT-1	10XE25	12180	3318	17	F_earlyRG2	F_earlyRG
E25_CGTCAGGTCCTCATTA-1	10XE25	11902	3095	17	F_earlyRG2	F_earlyRG
E25_CGTCCATAGTGTACCT-1	10XE25	10743	3096	11	F_Deep Layer	F_Deep Layer
E25_CGTCCATCAGACAGGT-1	10XE25	11340	3059	17	F_earlyRG2	F_earlyRG
E25_CGTCCATCAGATGAGC-1	10XE25	10074	2988	17	F_earlyRG2	F_earlyRG
E25_CGTCTACAGTGGACGT-1	10XE25	6549	2506	9	F_earlyRG1	F_earlyRG
E25_CGTCTACCACAGTCGC-1	10XE25	8144	2557	9	F_earlyRG1	F_earlyRG
E25_CGTCTACCAGCGAACA-1	10XE25	4817	1778	9	F_earlyRG1	F_earlyRG
E25_CGTCTACGTAAACCTC-1	10XE25	8816	2590	11	F_Deep Layer	F_Deep Layer
E25_CGTGAGCAGACGACGT-1	10XE25	15970	4121	11	F_Deep Layer	F_Deep Layer
E25_CGTGAGCAGCCAGTTT-1	10XE25	8389	2766	19	F_earlyRG3	F_earlyRG
E25_CGTGAGCCATGCAACT-1	10XE25	8320	2638	11	F_Deep Layer	F_Deep Layer
E25_CGTGAGCGTCACCCAG-1	10XE25	2865	1325	9	F_earlyRG1	F_earlyRG
E25_CGTGAGCGTGACTACT-1	10XE25	3838	1441	9	F_earlyRG1	F_earlyRG
E25_CGTGAGCTCAGGTTCA-1	10XE25	9863	2821	9	F_earlyRG1	F_earlyRG
E25_CGTGAGCTCCCAGGTG-1	10XE25	10943	3036	17	F_earlyRG2	F_earlyRG
E25_CGTGAGCTCTACTCAT-1	10XE25	8000	2756	19	F_earlyRG3	F_earlyRG
E25_CGTGTAAAGGCAGGTT-1	10XE25	8507	2735	17	F_earlyRG2	F_earlyRG
E25_CGTGTAAAGTCGATAA-1	10XE25	5653	2185	9	F_earlyRG1	F_earlyRG
E25_CGTGTAAAGTGAACGC-1	10XE25	5588	2137	11	F_Deep Layer	F_Deep Layer
E25_CGTGTAACAAGACACG-1	10XE25	8872	2798	19	F_earlyRG3	F_earlyRG
E25_CGTGTAAGTATAAACG-1	10XE25	5631	2221	11	F_Deep Layer	F_Deep Layer
E25_CGTGTAAGTTGAACTC-1	10XE25	8319	2721	11	F_Deep Layer	F_Deep Layer
E25_CGTGTAATCTAAGCCA-1	10XE25	8420	2817	17	F_earlyRG2	F_earlyRG
E25_CGTGTCTCAACACCTA-1	10XE25	7918	2463	9	F_earlyRG1	F_earlyRG
E25_CGTGTCTCACATGTGT-1	10XE25	5208	2210	9	F_earlyRG1	F_earlyRG
E25_CGTGTCTCACTTCGAA-1	10XE25	7158	2309	11	F_Deep Layer	F_Deep Layer
E25_CGTGTCTGTCTAACGT-1	10XE25	6569	2231	11	F_Deep Layer	F_Deep Layer
E25_CGTGTCTGTGTGAAAT-1	10XE25	11010	3064	17	F_earlyRG2	F_earlyRG
E25_CGTGTCTTCAAAGTAG-1	10XE25	8427	2592	9	F_earlyRG1	F_earlyRG
E25_CGTGTCTTCACATGCA-1	10XE25	7914	2319	11	F_Deep Layer	F_Deep Layer
E25_CGTGTCTTCGGCGGTT-1	10XE25	5859	1851	11	F_Deep Layer	F_Deep Layer
E25_CGTTAGACAAGCTGGA-1	10XE25	8250	2808	11	F_Deep Layer	F_Deep Layer
E25_CGTTAGACATCCTAGA-1	10XE25	7976	2608	9	F_earlyRG1	F_earlyRG
E25_CGTTAGAGTGTTCTTT-1	10XE25	5439	2023	9	F_earlyRG1	F_earlyRG
E25_CGTTAGATCCGGGTGT-1	10XE25	4098	1608	9	F_earlyRG1	F_earlyRG
E25_CGTTAGATCGGATGGA-1	10XE25	8978	2728	9	F_earlyRG1	F_earlyRG
E25_CGTTAGATCGGTCTAA-1	10XE25	17041	4234	11	F_Deep Layer	F_Deep Layer
E25_CGTTAGATCTACGAGT-1	10XE25	6982	2763	14	F_Upper Layer3	F_Upper Layer
E25_CGTTCTGCAATTGCTG-1	10XE25	10324	3150	14	F_Upper Layer3	F_Upper Layer
E25_CGTTCTGCAGTATCTG-1	10XE25	10623	2972	17	F_earlyRG2	F_earlyRG
E25_CGTTCTGCATACGCCG-1	10XE25	7066	2391	9	F_earlyRG1	F_earlyRG
E25_CGTTCTGTCACCAGGC-1	10XE25	7655	2758	17	F_earlyRG2	F_earlyRG
E25_CGTTCTGTCTGAAAGA-1	10XE25	7355	2373	11	F_Deep Layer	F_Deep Layer
E25_CGTTGGGAGTTGAGTA-1	10XE25	9804	2942	11	F_Deep Layer	F_Deep Layer
E25_CGTTGGGGTAGCTTGT-1	10XE25	10699	3044	9	F_earlyRG1	F_earlyRG
E25_CGTTGGGGTTATCGGT-1	10XE25	7104	2661	14	F_Upper Layer3	F_Upper Layer
E25_CGTTGGGTCATCGGAT-1	10XE25	9025	2510	9	F_earlyRG1	F_earlyRG
E25_CGTTGGGTCCTTCAAT-1	10XE25	7583	2520	9	F_earlyRG1	F_earlyRG
E25_CGTTGGGTCGGATGTT-1	10XE25	9728	2780	9	F_earlyRG1	F_earlyRG
E25_CGTTGGGTCTTAGCCC-1	10XE25	3551	1623	11	F_Deep Layer	F_Deep Layer
E25_CTAACTTAGCCAGTTT-1	10XE25	6037	2126	11	F_Deep Layer	F_Deep Layer
E25_CTAACTTAGGTGCACA-1	10XE25	11518	2992	9	F_earlyRG1	F_earlyRG
E25_CTAACTTAGTATCTCG-1	10XE25	11827	3385	17	F_earlyRG2	F_earlyRG
E25_CTAACTTCAGATGAGC-1	10XE25	3811	1731	9	F_earlyRG1	F_earlyRG
E25_CTAACTTTCACCTCGT-1	10XE25	4286	1668	9	F_earlyRG1	F_earlyRG
E25_CTAACTTTCATCTGTT-1	10XE25	7643	2712	9	F_earlyRG1	F_earlyRG
E25_CTAACTTTCTTAGCCC-1	10XE25	5968	2353	17	F_earlyRG2	F_earlyRG
E25_CTAACTTTCTTCATGT-1	10XE25	9004	2818	9	F_earlyRG1	F_earlyRG
E25_CTAAGACAGAAAGTGG-1	10XE25	10914	3419	17	F_earlyRG2	F_earlyRG
E25_CTAAGACAGCCGCCTA-1	10XE25	11345	3173	9	F_earlyRG1	F_earlyRG
E25_CTAAGACAGCTGTCTA-1	10XE25	3294	1552	19	F_earlyRG3	F_earlyRG
E25_CTAAGACCACACCGAC-1	10XE25	11555	3251	17	F_earlyRG2	F_earlyRG
E25_CTAAGACCAGATGAGC-1	10XE25	6461	2434	14	F_Upper Layer3	F_Upper Layer
E25_CTAAGACCATATGGTC-1	10XE25	13432	3538	17	F_earlyRG2	F_earlyRG
E25_CTAAGACTCCACGAAT-1	10XE25	5597	2312	17	F_earlyRG2	F_earlyRG
E25_CTAAGACTCGTCGTTC-1	10XE25	15554	4052	19	F_earlyRG3	F_earlyRG
E25_CTAATGGAGAAGATTC-1	10XE25	8507	2742	11	F_Deep Layer	F_Deep Layer
E25_CTAATGGTCAACACCA-1	10XE25	10106	3127	11	F_Deep Layer	F_Deep Layer
E25_CTAATGGTCCAAATGC-1	10XE25	5902	2283	17	F_earlyRG2	F_earlyRG
E25_CTAATGGTCCGTACAA-1	10XE25	9948	3114	11	F_Deep Layer	F_Deep Layer
E25_CTACACCAGTGGAGAA-1	10XE25	8378	2741	9	F_earlyRG1	F_earlyRG
E25_CTACACCCAAGAGTCG-1	10XE25	7201	2366	11	F_Deep Layer	F_Deep Layer
E25_CTACACCCACCGAAAG-1	10XE25	7811	2438	9	F_earlyRG1	F_earlyRG
E25_CTACACCGTGGTTTCA-1	10XE25	3648	1495	9	F_earlyRG1	F_earlyRG
E25_CTACACCGTGTGAAAT-1	10XE25	2050	857	9	F_earlyRG1	F_earlyRG
E25_CTACACCGTTAAGATG-1	10XE25	4432	1865	11	F_Deep Layer	F_Deep Layer
E25_CTACACCGTTACGCGC-1	10XE25	10351	2971	9	F_earlyRG1	F_earlyRG
E25_CTACACCGTTCAGTAC-1	10XE25	10100	2859	17	F_earlyRG2	F_earlyRG
E25_CTACACCTCAGCATGT-1	10XE25	5037	1982	9	F_earlyRG1	F_earlyRG
E25_CTACATTAGCGTAGTG-1	10XE25	10922	3272	17	F_earlyRG2	F_earlyRG
E25_CTACATTAGGACAGAA-1	10XE25	7330	2488	9	F_earlyRG1	F_earlyRG
E25_CTACATTCACATTAGC-1	10XE25	12561	3328	11	F_Deep Layer	F_Deep Layer
E25_CTACATTGTCAATACC-1	10XE25	10438	3193	17	F_earlyRG2	F_earlyRG
E25_CTACATTTCACCTCGT-1	10XE25	3077	1456	19	F_earlyRG3	F_earlyRG
E25_CTACATTTCGTAGGTT-1	10XE25	6368	2255	9	F_earlyRG1	F_earlyRG
E25_CTACATTTCTCCCTGA-1	10XE25	7792	2413	11	F_Deep Layer	F_Deep Layer
E25_CTACATTTCTTCGGTC-1	10XE25	15347	3929	19	F_earlyRG3	F_earlyRG
E25_CTACATTTCTTTACAC-1	10XE25	8263	2548	9	F_earlyRG1	F_earlyRG
E25_CTACCCACAGATGAGC-1	10XE25	11757	3247	11	F_Deep Layer	F_Deep Layer
E25_CTACCCACAGCAGTTT-1	10XE25	10037	2971	19	F_earlyRG3	F_earlyRG
E25_CTACCCACAGTATAAG-1	10XE25	9260	2894	19	F_earlyRG3	F_earlyRG
E25_CTACCCACAGTCTTCC-1	10XE25	15252	4085	19	F_earlyRG3	F_earlyRG
E25_CTACCCAGTCTCTTAT-1	10XE25	8494	2861	11	F_Deep Layer	F_Deep Layer
E25_CTACCCATCACAACGT-1	10XE25	10156	3006	17	F_earlyRG2	F_earlyRG
E25_CTACCCATCGAGCCCA-1	10XE25	13055	3675	11	F_Deep Layer	F_Deep Layer
E25_CTACGTCAGATCCGAG-1	10XE25	5051	1890	14	F_Upper Layer3	F_Upper Layer
E25_CTACGTCAGCGCTTAT-1	10XE25	6362	2291	9	F_earlyRG1	F_earlyRG
E25_CTACGTCAGTTAGGTA-1	10XE25	3752	1643	17	F_earlyRG2	F_earlyRG
E25_CTACGTCAGTTCGCGC-1	10XE25	5527	2052	11	F_Deep Layer	F_Deep Layer
E25_CTACGTCCAACAACCT-1	10XE25	7637	2544	9	F_earlyRG1	F_earlyRG
E25_CTACGTCCACGCATCG-1	10XE25	8224	2551	9	F_earlyRG1	F_earlyRG
E25_CTACGTCCAGCTCGAC-1	10XE25	10487	3121	17	F_earlyRG2	F_earlyRG
E25_CTACGTCGTAGCGCAA-1	10XE25	13725	3592	19	F_earlyRG3	F_earlyRG
E25_CTACGTCGTGCGGTAA-1	10XE25	4686	1926	11	F_Deep Layer	F_Deep Layer
E25_CTACGTCGTTAAAGTG-1	10XE25	6662	2282	9	F_earlyRG1	F_earlyRG
E25_CTACGTCTCAACGGCC-1	10XE25	19775	4439	17	F_earlyRG2	F_earlyRG
E25_CTAGAGTAGAAACCAT-1	10XE25	10525	3268	17	F_earlyRG2	F_earlyRG
E25_CTAGAGTAGCCCAATT-1	10XE25	8063	2623	11	F_Deep Layer	F_Deep Layer
E25_CTAGAGTAGCTAGTGG-1	10XE25	6447	2156	11	F_Deep Layer	F_Deep Layer
E25_CTAGAGTCAATGGACG-1	10XE25	4204	1781	23	F_Microglia3	F_Microglia
E25_CTAGAGTCAGCTGCTG-1	10XE25	8495	2530	11	F_Deep Layer	F_Deep Layer
E25_CTAGAGTCAGCTGGCT-1	10XE25	8586	2586	11	F_Deep Layer	F_Deep Layer
E25_CTAGAGTGTACCGGCT-1	10XE25	5885	2206	17	F_earlyRG2	F_earlyRG
E25_CTAGAGTTCGGAAACG-1	10XE25	8575	2649	11	F_Deep Layer	F_Deep Layer
E25_CTAGAGTTCTCCCTGA-1	10XE25	3222	1366	9	F_earlyRG1	F_earlyRG
E25_CTAGCCTCAGGTCTCG-1	10XE25	15202	3726	19	F_earlyRG3	F_earlyRG
E25_CTAGCCTCATAGTAAG-1	10XE25	5829	2199	9	F_earlyRG1	F_earlyRG
E25_CTAGCCTGTAAGGGAA-1	10XE25	6019	2486	14	F_Upper Layer3	F_Upper Layer
E25_CTAGCCTGTGAGGGTT-1	10XE25	9758	2975	17	F_earlyRG2	F_earlyRG
E25_CTAGCCTGTGGGTATG-1	10XE25	7378	2332	11	F_Deep Layer	F_Deep Layer
E25_CTAGCCTTCAAGCCTA-1	10XE25	5063	2017	19	F_earlyRG3	F_earlyRG
E25_CTAGTGAAGACTAGAT-1	10XE25	9433	2792	9	F_earlyRG1	F_earlyRG
E25_CTAGTGACAATGAAAC-1	10XE25	7575	2297	9	F_earlyRG1	F_earlyRG
E25_CTAGTGACAATGGACG-1	10XE25	9836	2809	20	F_mural	F_mural
E25_CTAGTGAGTAAATGTG-1	10XE25	7751	2476	9	F_earlyRG1	F_earlyRG
E25_CTAGTGAGTTCGTCTC-1	10XE25	8672	2827	17	F_earlyRG2	F_earlyRG
E25_CTAGTGATCCTGTAGA-1	10XE25	9712	2988	11	F_Deep Layer	F_Deep Layer
E25_CTAGTGATCGTGACAT-1	10XE25	9865	2981	17	F_earlyRG2	F_earlyRG
E25_CTAGTGATCTGCTTGC-1	10XE25	6392	2171	9	F_earlyRG1	F_earlyRG
E25_CTCACACAGAAGATTC-1	10XE25	12500	3395	17	F_earlyRG2	F_earlyRG
E25_CTCACACAGGGAACGG-1	10XE25	5930	2079	11	F_Deep Layer	F_Deep Layer
E25_CTCACACCACATTTCT-1	10XE25	3489	1525	11	F_Deep Layer	F_Deep Layer
E25_CTCACACCACGCATCG-1	10XE25	10016	3124	4	F_IPC2	F_IPC
E25_CTCACACGTAAAGTCA-1	10XE25	8590	2653	17	F_earlyRG2	F_earlyRG
E25_CTCACACGTATCAGTC-1	10XE25	11593	3348	11	F_Deep Layer	F_Deep Layer
E25_CTCACACTCGTGACAT-1	10XE25	6626	2383	11	F_Deep Layer	F_Deep Layer
E25_CTCACACTCTTGTCAT-1	10XE25	10461	3108	17	F_earlyRG2	F_earlyRG
E25_CTCAGAAAGAGTACCG-1	10XE25	8067	2561	9	F_earlyRG1	F_earlyRG
E25_CTCAGAATCCTCATTA-1	10XE25	5724	2103	19	F_earlyRG3	F_earlyRG
E25_CTCAGAATCCTGCAGG-1	10XE25	9522	2972	17	F_earlyRG2	F_earlyRG
E25_CTCAGAATCGGAGGTA-1	10XE25	8409	2693	9	F_earlyRG1	F_earlyRG
E25_CTCATTAAGACGCTTT-1	10XE25	10675	3020	11	F_Deep Layer	F_Deep Layer
E25_CTCATTAAGCAGGTCA-1	10XE25	10478	3080	17	F_earlyRG2	F_earlyRG
E25_CTCATTAAGTTGAGAT-1	10XE25	12701	3505	17	F_earlyRG2	F_earlyRG
E25_CTCATTACACAGGCCT-1	10XE25	8759	2615	9	F_earlyRG1	F_earlyRG
E25_CTCATTACACCTGGTG-1	10XE25	13322	3526	17	F_earlyRG2	F_earlyRG
E25_CTCATTACATCGGGTC-1	10XE25	10004	2829	9	F_earlyRG1	F_earlyRG
E25_CTCATTATCCAAACAC-1	10XE25	7477	2307	9	F_earlyRG1	F_earlyRG
E25_CTCATTATCGAGGTAG-1	10XE25	18762	4496	11	F_Deep Layer	F_Deep Layer
E25_CTCATTATCGCCAAAT-1	10XE25	8468	2766	14	F_Upper Layer3	F_Upper Layer
E25_CTCATTATCTGCTGCT-1	10XE25	3090	1365	19	F_earlyRG3	F_earlyRG
E25_CTCCTAGAGGAGTACC-1	10XE25	3175	1380	9	F_earlyRG1	F_earlyRG
E25_CTCCTAGCATGAAGTA-1	10XE25	5411	2295	19	F_earlyRG3	F_earlyRG
E25_CTCGAAAAGACAAGCC-1	10XE25	13585	3638	17	F_earlyRG2	F_earlyRG
E25_CTCGAAAAGGCAGTCA-1	10XE25	2622	1227	9	F_earlyRG1	F_earlyRG
E25_CTCGAAACACCGAATT-1	10XE25	11595	3130	17	F_earlyRG2	F_earlyRG
E25_CTCGAAACACTCAGGC-1	10XE25	10186	3206	17	F_earlyRG2	F_earlyRG
E25_CTCGAAAGTAAAGGAG-1	10XE25	12096	3286	17	F_earlyRG2	F_earlyRG
E25_CTCGAAAGTTATGTGC-1	10XE25	9383	2997	11	F_Deep Layer	F_Deep Layer
E25_CTCGAAATCCGTTGCT-1	10XE25	8388	2716	9	F_earlyRG1	F_earlyRG
E25_CTCGAAATCCTGCAGG-1	10XE25	10477	2975	9	F_earlyRG1	F_earlyRG
E25_CTCGAGGAGCGTCTAT-1	10XE25	7383	2587	9	F_earlyRG1	F_earlyRG
E25_CTCGAGGAGTGAAGAG-1	10XE25	10424	2834	9	F_earlyRG1	F_earlyRG
E25_CTCGAGGCAATAGCGG-1	10XE25	8506	2572	9	F_earlyRG1	F_earlyRG
E25_CTCGAGGCAGGGTACA-1	10XE25	2946	1432	11	F_Deep Layer	F_Deep Layer
E25_CTCGAGGCAGTGGGAT-1	10XE25	6863	2076	11	F_Deep Layer	F_Deep Layer
E25_CTCGAGGCATGACGGA-1	10XE25	13553	3533	11	F_Deep Layer	F_Deep Layer
E25_CTCGAGGGTCTCACCT-1	10XE25	5143	1930	9	F_earlyRG1	F_earlyRG
E25_CTCGAGGTCGACCAGC-1	10XE25	8010	2714	9	F_earlyRG1	F_earlyRG
E25_CTCGAGGTCTACTCAT-1	10XE25	11729	3046	9	F_earlyRG1	F_earlyRG
E25_CTCGGAGAGTACGATA-1	10XE25	11384	3164	11	F_Deep Layer	F_Deep Layer
E25_CTCGGAGGTCGACTAT-1	10XE25	7137	2345	9	F_earlyRG1	F_earlyRG
E25_CTCGGAGGTCTCCACT-1	10XE25	5418	2075	11	F_Deep Layer	F_Deep Layer
E25_CTCGGAGGTGCCTGCA-1	10XE25	9761	1142	25	F_unknown	F_unknown
E25_CTCGGAGTCCCTAACC-1	10XE25	7602	2263	11	F_Deep Layer	F_Deep Layer
E25_CTCGGGAAGATCGGGT-1	10XE25	3192	1484	19	F_earlyRG3	F_earlyRG
E25_CTCGGGAGTCGCATAT-1	10XE25	2689	1099	9	F_earlyRG1	F_earlyRG
E25_CTCGGGATCAAACCGT-1	10XE25	2153	741	6	F_midRG	F_midRG
E25_CTCGGGATCCAGATCA-1	10XE25	9988	3070	17	F_earlyRG2	F_earlyRG
E25_CTCGTACAGCGCTCCA-1	10XE25	9145	2726	17	F_earlyRG2	F_earlyRG
E25_CTCGTACAGCTCCTCT-1	10XE25	10229	3048	19	F_earlyRG3	F_earlyRG
E25_CTCGTACCACCACCAG-1	10XE25	8665	2623	9	F_earlyRG1	F_earlyRG
E25_CTCGTACCAGCTGTTA-1	10XE25	11049	2961	9	F_earlyRG1	F_earlyRG
E25_CTCGTACCATTGAGCT-1	10XE25	11271	3324	17	F_earlyRG2	F_earlyRG
E25_CTCGTACGTCCGTTAA-1	10XE25	12484	3483	17	F_earlyRG2	F_earlyRG
E25_CTCGTACTCAGTGCAT-1	10XE25	8042	2604	9	F_earlyRG1	F_earlyRG
E25_CTCGTACTCCAATGGT-1	10XE25	12650	3313	17	F_earlyRG2	F_earlyRG
E25_CTCGTACTCCCTAACC-1	10XE25	6370	2190	9	F_earlyRG1	F_earlyRG
E25_CTCGTACTCGTCTGAA-1	10XE25	9647	3179	19	F_earlyRG3	F_earlyRG
E25_CTCGTACTCTAACTGG-1	10XE25	6642	2172	9	F_earlyRG1	F_earlyRG
E25_CTCGTCAAGATACACA-1	10XE25	13066	3173	20	F_mural	F_mural
E25_CTCGTCAAGATCCTGT-1	10XE25	9393	2719	9	F_earlyRG1	F_earlyRG
E25_CTCGTCAAGATCTGCT-1	10XE25	6868	2403	17	F_earlyRG2	F_earlyRG
E25_CTCGTCACATTGTGCA-1	10XE25	7098	2374	9	F_earlyRG1	F_earlyRG
E25_CTCGTCAGTCATCCCT-1	10XE25	6956	2385	9	F_earlyRG1	F_earlyRG
E25_CTCGTCATCTTGTTTG-1	10XE25	5786	2074	9	F_earlyRG1	F_earlyRG
E25_CTCTAATAGAAGGACA-1	10XE25	10340	3131	17	F_earlyRG2	F_earlyRG
E25_CTCTAATAGATGTAAC-1	10XE25	5220	1982	11	F_Deep Layer	F_Deep Layer
E25_CTCTAATAGGAACTGC-1	10XE25	9634	2945	11	F_Deep Layer	F_Deep Layer
E25_CTCTAATAGGAGTCTG-1	10XE25	8730	2735	9	F_earlyRG1	F_earlyRG
E25_CTCTAATAGGCAAAGA-1	10XE25	8699	2749	9	F_earlyRG1	F_earlyRG
E25_CTCTAATAGGCGATAC-1	10XE25	8160	2581	11	F_Deep Layer	F_Deep Layer
E25_CTCTAATCACACCGAC-1	10XE25	8947	2831	19	F_earlyRG3	F_earlyRG
E25_CTCTAATCATCCTAGA-1	10XE25	6616	2454	19	F_earlyRG3	F_earlyRG
E25_CTCTAATGTCGAAAGC-1	10XE25	2165	912	19	F_earlyRG3	F_earlyRG
E25_CTCTAATGTGAACCTT-1	10XE25	7459	2479	9	F_earlyRG1	F_earlyRG
E25_CTCTAATGTTAGAACA-1	10XE25	8002	2891	11	F_Deep Layer	F_Deep Layer
E25_CTCTAATTCTAACTTC-1	10XE25	13464	3630	11	F_Deep Layer	F_Deep Layer
E25_CTCTACGAGAAACGAG-1	10XE25	14941	3732	17	F_earlyRG2	F_earlyRG
E25_CTCTACGAGACTAAGT-1	10XE25	6789	2735	14	F_Upper Layer3	F_Upper Layer
E25_CTCTACGAGATGCCTT-1	10XE25	10802	3003	9	F_earlyRG1	F_earlyRG
E25_CTCTACGAGTGCCAGA-1	10XE25	10258	3089	19	F_earlyRG3	F_earlyRG
E25_CTCTACGCACGTCTCT-1	10XE25	10620	3459	11	F_Deep Layer	F_Deep Layer
E25_CTCTACGGTACCGAGA-1	10XE25	11372	3049	9	F_earlyRG1	F_earlyRG
E25_CTCTACGGTAGAGCTG-1	10XE25	5695	2188	9	F_earlyRG1	F_earlyRG
E25_CTCTACGGTGTGTGCC-1	10XE25	9946	2843	11	F_Deep Layer	F_Deep Layer
E25_CTCTACGGTTAGTGGG-1	10XE25	8259	2601	9	F_earlyRG1	F_earlyRG
E25_CTCTACGTCGTTACGA-1	10XE25	13124	3474	11	F_Deep Layer	F_Deep Layer
E25_CTCTGGTAGTCCAGGA-1	10XE25	10970	3059	17	F_earlyRG2	F_earlyRG
E25_CTCTGGTCATCGATTG-1	10XE25	9177	2893	17	F_earlyRG2	F_earlyRG
E25_CTCTGGTCATGTAGTC-1	10XE25	6580	2173	11	F_Deep Layer	F_Deep Layer
E25_CTCTGGTGTAGGCATG-1	10XE25	8093	2442	9	F_earlyRG1	F_earlyRG
E25_CTCTGGTGTTCCAACA-1	10XE25	7184	2236	11	F_Deep Layer	F_Deep Layer
E25_CTCTGGTTCACAAACC-1	10XE25	8528	2789	11	F_Deep Layer	F_Deep Layer
E25_CTCTGGTTCAGTACGT-1	10XE25	5606	2117	9	F_earlyRG1	F_earlyRG
E25_CTGAAACCACCATGTA-1	10XE25	7727	2533	11	F_Deep Layer	F_Deep Layer
E25_CTGAAACGTCATATGC-1	10XE25	7790	2752	19	F_earlyRG3	F_earlyRG
E25_CTGAAACGTCGCTTCT-1	10XE25	9588	2859	17	F_earlyRG2	F_earlyRG
E25_CTGAAACGTCTCAACA-1	10XE25	12305	737	25	F_unknown	F_unknown
E25_CTGAAACTCATTTGGG-1	10XE25	5741	2255	11	F_Deep Layer	F_Deep Layer
E25_CTGAAGTAGGTGACCA-1	10XE25	9385	2972	4	F_IPC2	F_IPC
E25_CTGAAGTGTGCGAAAC-1	10XE25	10091	2826	9	F_earlyRG1	F_earlyRG
E25_CTGAAGTGTTGGACCC-1	10XE25	3156	1518	19	F_earlyRG3	F_earlyRG
E25_CTGAAGTTCATTCACT-1	10XE25	6843	2383	9	F_earlyRG1	F_earlyRG
E25_CTGATAGAGAGCTGCA-1	10XE25	10777	3057	19	F_earlyRG3	F_earlyRG
E25_CTGATCCCACTGTGTA-1	10XE25	5394	2073	19	F_earlyRG3	F_earlyRG
E25_CTGATCCCAGATTGCT-1	10XE25	8338	2633	11	F_Deep Layer	F_Deep Layer
E25_CTGATCCCAGTCACTA-1	10XE25	9362	2626	9	F_earlyRG1	F_earlyRG
E25_CTGATCCGTCACTGGC-1	10XE25	9908	3001	4	F_IPC2	F_IPC
E25_CTGATCCGTCTCATCC-1	10XE25	9803	3036	17	F_earlyRG2	F_earlyRG
E25_CTGATCCGTGAGGGAG-1	10XE25	8371	2495	9	F_earlyRG1	F_earlyRG
E25_CTGCCTAAGATATACG-1	10XE25	8653	2560	9	F_earlyRG1	F_earlyRG
E25_CTGCCTAAGTGCAAGC-1	10XE25	10515	3197	17	F_earlyRG2	F_earlyRG
E25_CTGCCTACAGGAATGC-1	10XE25	8095	2537	11	F_Deep Layer	F_Deep Layer
E25_CTGCCTACATCTCGCT-1	10XE25	12049	3287	17	F_earlyRG2	F_earlyRG
E25_CTGCCTAGTAAGGATT-1	10XE25	8513	2711	9	F_earlyRG1	F_earlyRG
E25_CTGCCTAGTCCGAACC-1	10XE25	9484	3042	9	F_earlyRG1	F_earlyRG
E25_CTGCCTAGTTGCCTCT-1	10XE25	7669	2526	9	F_earlyRG1	F_earlyRG
E25_CTGCCTAGTTTGACAC-1	10XE25	9259	2692	9	F_earlyRG1	F_earlyRG
E25_CTGCGGAAGAAAGTGG-1	10XE25	10065	2995	11	F_Deep Layer	F_Deep Layer
E25_CTGCGGAAGGCTAGAC-1	10XE25	11692	3429	19	F_earlyRG3	F_earlyRG
E25_CTGCGGAAGGTGCTTT-1	10XE25	10674	3060	11	F_Deep Layer	F_Deep Layer
E25_CTGCGGACATCGTCGG-1	10XE25	3985	1654	4	F_IPC2	F_IPC
E25_CTGCGGACATCTCGCT-1	10XE25	3404	1289	9	F_earlyRG1	F_earlyRG
E25_CTGCGGAGTAAACCTC-1	10XE25	10803	2969	11	F_Deep Layer	F_Deep Layer
E25_CTGCGGAGTGGCCCTA-1	10XE25	9590	3178	17	F_earlyRG2	F_earlyRG
E25_CTGCGGAGTGTTGGGA-1	10XE25	7310	2461	11	F_Deep Layer	F_Deep Layer
E25_CTGCGGATCCGCATCT-1	10XE25	5034	1920	11	F_Deep Layer	F_Deep Layer
E25_CTGCGGATCGGCGGTT-1	10XE25	9219	2684	17	F_earlyRG2	F_earlyRG
E25_CTGCTGTAGCCACGCT-1	10XE25	11178	3320	11	F_Deep Layer	F_Deep Layer
E25_CTGCTGTAGGAACTGC-1	10XE25	8747	2566	9	F_earlyRG1	F_earlyRG
E25_CTGCTGTCAGCCTTGG-1	10XE25	6707	2188	11	F_Deep Layer	F_Deep Layer
E25_CTGCTGTGTAGGACAC-1	10XE25	3998	1608	17	F_earlyRG2	F_earlyRG
E25_CTGCTGTGTCGTCTTC-1	10XE25	9033	2657	11	F_Deep Layer	F_Deep Layer
E25_CTGCTGTGTTACTGAC-1	10XE25	6759	2349	9	F_earlyRG1	F_earlyRG
E25_CTGCTGTGTTCATGGT-1	10XE25	14343	3906	19	F_earlyRG3	F_earlyRG
E25_CTGCTGTTCTTGTACT-1	10XE25	7341	2408	9	F_earlyRG1	F_earlyRG
E25_CTGCTGTTCTTGTTTG-1	10XE25	10573	3168	19	F_earlyRG3	F_earlyRG
E25_CTGCTGTTCTTTACGT-1	10XE25	4163	1826	9	F_earlyRG1	F_earlyRG
E25_CTGGTCTAGTGGACGT-1	10XE25	11197	3047	17	F_earlyRG2	F_earlyRG
E25_CTGGTCTGTCTGGAGA-1	10XE25	8427	2440	12	F_Microglia2	F_Microglia
E25_CTGGTCTGTCTTGTCC-1	10XE25	13780	3820	17	F_earlyRG2	F_earlyRG
E25_CTGGTCTTCCATGCTC-1	10XE25	7080	2355	9	F_earlyRG1	F_earlyRG
E25_CTGGTCTTCTTTACAC-1	10XE25	14841	4070	19	F_earlyRG3	F_earlyRG
E25_CTGTGCTAGCGTAATA-1	10XE25	10140	2844	9	F_earlyRG1	F_earlyRG
E25_CTGTGCTAGCTCAACT-1	10XE25	7858	2598	17	F_earlyRG2	F_earlyRG
E25_CTGTGCTCAAACCCAT-1	10XE25	5545	2127	11	F_Deep Layer	F_Deep Layer
E25_CTGTGCTGTCCCTACT-1	10XE25	7520	2296	11	F_Deep Layer	F_Deep Layer
E25_CTGTGCTTCCAAGTAC-1	10XE25	8754	2848	11	F_Deep Layer	F_Deep Layer
E25_CTGTGCTTCGCCCTTA-1	10XE25	5327	2557	17	F_earlyRG2	F_earlyRG
E25_CTGTGCTTCGCGGATC-1	10XE25	5281	2120	9	F_earlyRG1	F_earlyRG
E25_CTGTGCTTCTCATTCA-1	10XE25	6511	2285	9	F_earlyRG1	F_earlyRG
E25_CTGTTTAAGCGACGTA-1	10XE25	3541	1381	9	F_earlyRG1	F_earlyRG
E25_CTGTTTAGTGTCTGAT-1	10XE25	7581	2622	14	F_Upper Layer3	F_Upper Layer
E25_CTGTTTATCATAAAGG-1	10XE25	9768	2703	11	F_Deep Layer	F_Deep Layer
E25_CTGTTTATCGCCTGAG-1	10XE25	2572	1286	11	F_Deep Layer	F_Deep Layer
E25_CTTAACTAGAATAGGG-1	10XE25	7216	2400	11	F_Deep Layer	F_Deep Layer
E25_CTTAACTAGGCGATAC-1	10XE25	10695	3029	17	F_earlyRG2	F_earlyRG
E25_CTTAACTAGGCTCTTA-1	10XE25	6540	2317	9	F_earlyRG1	F_earlyRG
E25_CTTAACTCAAGCCATT-1	10XE25	15596	3816	17	F_earlyRG2	F_earlyRG
E25_CTTAACTCAGTCTTCC-1	10XE25	5635	1813	9	F_earlyRG1	F_earlyRG
E25_CTTAACTCATTCTCAT-1	10XE25	10328	3140	19	F_earlyRG3	F_earlyRG
E25_CTTAACTGTAACGACG-1	10XE25	22657	2277	25	F_unknown	F_unknown
E25_CTTAACTGTCCGAACC-1	10XE25	8141	2617	9	F_earlyRG1	F_earlyRG
E25_CTTAACTGTTCGCGAC-1	10XE25	10626	2970	17	F_earlyRG2	F_earlyRG
E25_CTTAACTTCAGAGGTG-1	10XE25	6412	2180	11	F_Deep Layer	F_Deep Layer
E25_CTTAACTTCCTGCTTG-1	10XE25	10626	3185	17	F_earlyRG2	F_earlyRG
E25_CTTACCGCAAGGACAC-1	10XE25	12371	3458	17	F_earlyRG2	F_earlyRG
E25_CTTACCGGTGGTACAG-1	10XE25	11155	3226	9	F_earlyRG1	F_earlyRG
E25_CTTACCGGTTGAGGTG-1	10XE25	14115	3894	11	F_Deep Layer	F_Deep Layer
E25_CTTACCGGTTGATTGC-1	10XE25	7632	2797	11	F_Deep Layer	F_Deep Layer
E25_CTTACCGTCATGGTCA-1	10XE25	9543	2933	19	F_earlyRG3	F_earlyRG
E25_CTTACCGTCGAGGTAG-1	10XE25	6772	2251	11	F_Deep Layer	F_Deep Layer
E25_CTTAGGAAGCTACCTA-1	10XE25	10252	3131	19	F_earlyRG3	F_earlyRG
E25_CTTAGGAAGGTCGGAT-1	10XE25	7638	2340	9	F_earlyRG1	F_earlyRG
E25_CTTAGGACACACCGAC-1	10XE25	7871	2603	9	F_earlyRG1	F_earlyRG
E25_CTTAGGACAGCCAATT-1	10XE25	6959	2459	9	F_earlyRG1	F_earlyRG
E25_CTTAGGAGTAGCGTGA-1	10XE25	10873	3163	17	F_earlyRG2	F_earlyRG
E25_CTTAGGAGTCATATCG-1	10XE25	9882	2939	11	F_Deep Layer	F_Deep Layer
E25_CTTAGGATCGCAAACT-1	10XE25	4611	2130	14	F_Upper Layer3	F_Upper Layer
E25_CTTCTCTAGGACATTA-1	10XE25	14838	3724	11	F_Deep Layer	F_Deep Layer
E25_CTTCTCTAGTCAATAG-1	10XE25	8357	2717	17	F_earlyRG2	F_earlyRG
E25_CTTCTCTCACATTCGA-1	10XE25	7865	2393	11	F_Deep Layer	F_Deep Layer
E25_CTTCTCTCAGTATGCT-1	10XE25	8274	2350	11	F_Deep Layer	F_Deep Layer
E25_CTTCTCTGTCGAAAGC-1	10XE25	10445	3041	11	F_Deep Layer	F_Deep Layer
E25_CTTCTCTGTGGAAAGA-1	10XE25	6496	2364	9	F_earlyRG1	F_earlyRG
E25_CTTCTCTGTTGCGTTA-1	10XE25	7424	2545	19	F_earlyRG3	F_earlyRG
E25_CTTGGCTAGAGTACAT-1	10XE25	4469	1834	11	F_Deep Layer	F_Deep Layer
E25_CTTGGCTAGTATGACA-1	10XE25	19304	4198	19	F_earlyRG3	F_earlyRG
E25_CTTGGCTAGTTGAGTA-1	10XE25	8360	2755	11	F_Deep Layer	F_Deep Layer
E25_CTTGGCTGTCCTGCTT-1	10XE25	7570	2345	9	F_earlyRG1	F_earlyRG
E25_CTTGGCTGTCTTGTCC-1	10XE25	6852	2230	11	F_Deep Layer	F_Deep Layer
E25_CTTGGCTGTTTGCATG-1	10XE25	2890	1128	11	F_Deep Layer	F_Deep Layer
E25_CTTTGCGCAATAAGCA-1	10XE25	11421	3237	11	F_Deep Layer	F_Deep Layer
E25_CTTTGCGCACCAACCG-1	10XE25	12437	3263	19	F_earlyRG3	F_earlyRG
E25_CTTTGCGCAGCTCGAC-1	10XE25	8806	2560	11	F_Deep Layer	F_Deep Layer
E25_CTTTGCGCAGGGTACA-1	10XE25	11450	3111	16	F_IPC3	F_IPC
E25_CTTTGCGGTAAGCACG-1	10XE25	8660	2738	9	F_earlyRG1	F_earlyRG
E25_CTTTGCGGTACCGCTG-1	10XE25	5658	2075	9	F_earlyRG1	F_earlyRG
E25_CTTTGCGGTCATATGC-1	10XE25	7092	2395	11	F_Deep Layer	F_Deep Layer
E25_CTTTGCGGTCTCATCC-1	10XE25	6105	2259	9	F_earlyRG1	F_earlyRG
E25_CTTTGCGGTGTCAATC-1	10XE25	10438	2942	9	F_earlyRG1	F_earlyRG
E25_CTTTGCGTCACTGGGC-1	10XE25	9541	2778	9	F_earlyRG1	F_earlyRG
E25_CTTTGCGTCCTAGGGC-1	10XE25	7256	2596	19	F_earlyRG3	F_earlyRG
E25_CTTTGCGTCGCCTGTT-1	10XE25	2624	1368	19	F_earlyRG3	F_earlyRG
E25_CTTTGCGTCGGTGTTA-1	10XE25	8622	2668	11	F_Deep Layer	F_Deep Layer
E25_GAAACTCAGGTGGGTT-1	10XE25	8095	2517	11	F_Deep Layer	F_Deep Layer
E25_GAAACTCGTCGACTAT-1	10XE25	8523	2610	9	F_earlyRG1	F_earlyRG
E25_GAAACTCTCCTATTCA-1	10XE25	8228	2740	19	F_earlyRG3	F_earlyRG
E25_GAAACTCTCGGAGGTA-1	10XE25	8150	2651	9	F_earlyRG1	F_earlyRG
E25_GAAATGAAGACAAAGG-1	10XE25	3373	1404	9	F_earlyRG1	F_earlyRG
E25_GAAATGAAGATCGGGT-1	10XE25	9068	2710	19	F_earlyRG3	F_earlyRG
E25_GAAATGAAGGTAAACT-1	10XE25	6341	2290	19	F_earlyRG3	F_earlyRG
E25_GAAATGACAACTGCGC-1	10XE25	8780	2732	17	F_earlyRG2	F_earlyRG
E25_GAAATGACATCCGCGA-1	10XE25	10315	3253	11	F_Deep Layer	F_Deep Layer
E25_GAAATGAGTCTAACGT-1	10XE25	6658	2186	9	F_earlyRG1	F_earlyRG
E25_GAAATGATCCTAAGTG-1	10XE25	8316	2664	9	F_earlyRG1	F_earlyRG
E25_GAAATGATCGCCTGAG-1	10XE25	10238	2922	17	F_earlyRG2	F_earlyRG
E25_GAACATCAGGAGTCTG-1	10XE25	12297	3257	11	F_Deep Layer	F_Deep Layer
E25_GAACATCAGTTAGGTA-1	10XE25	4680	2000	17	F_earlyRG2	F_earlyRG
E25_GAACATCCAATCGGTT-1	10XE25	6959	2265	9	F_earlyRG1	F_earlyRG
E25_GAACATCCACAGGCCT-1	10XE25	7031	2584	11	F_Deep Layer	F_Deep Layer
E25_GAACATCGTAGGAGTC-1	10XE25	9383	2712	9	F_earlyRG1	F_earlyRG
E25_GAACATCGTCAGAGGT-1	10XE25	11484	3294	11	F_Deep Layer	F_Deep Layer
E25_GAACATCGTGTATGGG-1	10XE25	4167	1788	14	F_Upper Layer3	F_Upper Layer
E25_GAACCTAAGAAGAAGC-1	10XE25	4846	1729	9	F_earlyRG1	F_earlyRG
E25_GAACCTAAGGGTCGAT-1	10XE25	13369	3550	17	F_earlyRG2	F_earlyRG
E25_GAACCTACAAGAGGCT-1	10XE25	10164	2991	9	F_earlyRG1	F_earlyRG
E25_GAACCTACACGAGAGT-1	10XE25	4481	1832	17	F_earlyRG2	F_earlyRG
E25_GAACCTAGTCTCATCC-1	10XE25	9542	2973	11	F_Deep Layer	F_Deep Layer
E25_GAACCTAGTGGTACAG-1	10XE25	8500	2728	11	F_Deep Layer	F_Deep Layer
E25_GAACCTAGTTCCATGA-1	10XE25	9399	2978	14	F_Upper Layer3	F_Upper Layer
E25_GAACCTAGTTCGCGAC-1	10XE25	8160	2516	11	F_Deep Layer	F_Deep Layer
E25_GAACCTATCCAAAGTC-1	10XE25	13318	3485	17	F_earlyRG2	F_earlyRG
E25_GAACCTATCGTCTGCT-1	10XE25	13293	3434	17	F_earlyRG2	F_earlyRG
E25_GAACGGAAGACCTAGG-1	10XE25	7446	2287	11	F_Deep Layer	F_Deep Layer
E25_GAACGGAAGTCGTTTG-1	10XE25	11446	3208	19	F_earlyRG3	F_earlyRG
E25_GAACGGAAGTTGTCGT-1	10XE25	8391	2798	19	F_earlyRG3	F_earlyRG
E25_GAACGGAAGTTTCCTT-1	10XE25	8318	2442	11	F_Deep Layer	F_Deep Layer
E25_GAACGGACAATACGCT-1	10XE25	8689	2417	11	F_Deep Layer	F_Deep Layer
E25_GAACGGACACAGCCCA-1	10XE25	11908	3359	17	F_earlyRG2	F_earlyRG
E25_GAACGGACACATCCAA-1	10XE25	7512	2297	11	F_Deep Layer	F_Deep Layer
E25_GAACGGACACCCAGTG-1	10XE25	7537	2464	9	F_earlyRG1	F_earlyRG
E25_GAACGGAGTACGCTGC-1	10XE25	13077	3535	17	F_earlyRG2	F_earlyRG
E25_GAACGGAGTACTTGAC-1	10XE25	3229	1476	19	F_earlyRG3	F_earlyRG
E25_GAACGGAGTCTACCTC-1	10XE25	12582	3540	17	F_earlyRG2	F_earlyRG
E25_GAACGGAGTCTTGCGG-1	10XE25	4167	1483	11	F_Deep Layer	F_Deep Layer
E25_GAACGGAGTGCCTTGG-1	10XE25	7496	2538	9	F_earlyRG1	F_earlyRG
E25_GAACGGAGTTTGTGTG-1	10XE25	11756	3240	17	F_earlyRG2	F_earlyRG
E25_GAAGCAGAGAGGGATA-1	10XE25	2496	1136	9	F_earlyRG1	F_earlyRG
E25_GAAGCAGAGGTCGGAT-1	10XE25	5294	2164	11	F_Deep Layer	F_Deep Layer
E25_GAAGCAGAGTGGAGTC-1	10XE25	3333	1402	9	F_earlyRG1	F_earlyRG
E25_GAAGCAGCAATGAATG-1	10XE25	6890	2418	19	F_earlyRG3	F_earlyRG
E25_GAAGCAGCACATGACT-1	10XE25	13682	3600	11	F_Deep Layer	F_Deep Layer
E25_GAAGCAGGTCGCATAT-1	10XE25	4481	1789	9	F_earlyRG1	F_earlyRG
E25_GAAGCAGTCCACTCCA-1	10XE25	8672	2608	9	F_earlyRG1	F_earlyRG
E25_GAAGCAGTCGCTAGCG-1	10XE25	8807	2661	9	F_earlyRG1	F_earlyRG
E25_GAAGCAGTCTCGCATC-1	10XE25	8242	2534	9	F_earlyRG1	F_earlyRG
E25_GAATAAGAGCCCTAAT-1	10XE25	10572	2922	9	F_earlyRG1	F_earlyRG
E25_GAATAAGCACAGACTT-1	10XE25	7834	2483	9	F_earlyRG1	F_earlyRG
E25_GAATAAGGTTAGTGGG-1	10XE25	10922	3193	11	F_Deep Layer	F_Deep Layer
E25_GAATAAGGTTTAAGCC-1	10XE25	8386	2766	9	F_earlyRG1	F_earlyRG
E25_GAATAAGTCAACACCA-1	10XE25	7208	2478	11	F_Deep Layer	F_Deep Layer
E25_GAATAAGTCCCGGATG-1	10XE25	22472	4798	19	F_earlyRG3	F_earlyRG
E25_GAATAAGTCTTAGAGC-1	10XE25	10311	3092	11	F_Deep Layer	F_Deep Layer
E25_GAATGAAAGCACAGGT-1	10XE25	9460	2643	11	F_Deep Layer	F_Deep Layer
E25_GAATGAAAGGGTGTTG-1	10XE25	9676	2741	9	F_earlyRG1	F_earlyRG
E25_GAATGAACACAGACTT-1	10XE25	10341	3240	17	F_earlyRG2	F_earlyRG
E25_GAATGAACACCTTGTC-1	10XE25	7349	2343	11	F_Deep Layer	F_Deep Layer
E25_GAATGAACATCAGTCA-1	10XE25	5993	2037	9	F_earlyRG1	F_earlyRG
E25_GAATGAACATTCTCAT-1	10XE25	16918	599	25	F_unknown	F_unknown
E25_GAATGAAGTGAGGGAG-1	10XE25	9613	3169	19	F_earlyRG3	F_earlyRG
E25_GAATGAAGTGTATGGG-1	10XE25	8988	2750	9	F_earlyRG1	F_earlyRG
E25_GAATGAATCTTTCCTC-1	10XE25	7184	2444	9	F_earlyRG1	F_earlyRG
E25_GACACGCAGAATAGGG-1	10XE25	8630	2651	4	F_IPC2	F_IPC
E25_GACACGCAGGTGACCA-1	10XE25	9254	2913	14	F_Upper Layer3	F_Upper Layer
E25_GACACGCCATGCGCAC-1	10XE25	8601	2649	9	F_earlyRG1	F_earlyRG
E25_GACACGCGTCGGCACT-1	10XE25	5185	1955	11	F_Deep Layer	F_Deep Layer
E25_GACACGCGTCTACCTC-1	10XE25	7191	2442	9	F_earlyRG1	F_earlyRG
E25_GACACGCGTCTTCTCG-1	10XE25	3182	1443	9	F_earlyRG1	F_earlyRG
E25_GACACGCGTGGGTATG-1	10XE25	10568	2957	9	F_earlyRG1	F_earlyRG
E25_GACACGCGTGTAATGA-1	10XE25	3341	1396	9	F_earlyRG1	F_earlyRG
E25_GACACGCGTTCGTGAT-1	10XE25	9989	2972	17	F_earlyRG2	F_earlyRG
E25_GACAGAGAGCGTCAAG-1	10XE25	10970	3115	11	F_Deep Layer	F_Deep Layer
E25_GACAGAGAGGATGGAA-1	10XE25	11173	3336	11	F_Deep Layer	F_Deep Layer
E25_GACAGAGAGTGTCCCG-1	10XE25	10427	3225	11	F_Deep Layer	F_Deep Layer
E25_GACAGAGCAGTCAGAG-1	10XE25	8367	2827	17	F_earlyRG2	F_earlyRG
E25_GACAGAGTCAACGAAA-1	10XE25	4180	1736	9	F_earlyRG1	F_earlyRG
E25_GACAGAGTCACATAGC-1	10XE25	8531	2602	11	F_Deep Layer	F_Deep Layer
E25_GACAGAGTCGGAGGTA-1	10XE25	7018	2330	17	F_earlyRG2	F_earlyRG
E25_GACAGAGTCTGCTGCT-1	10XE25	9253	2723	9	F_earlyRG1	F_earlyRG
E25_GACCAATAGCGGCTTC-1	10XE25	8002	2732	19	F_earlyRG3	F_earlyRG
E25_GACCAATCAATGACCT-1	10XE25	4536	1873	18	F_Upper Layer4	F_Upper Layer
E25_GACCAATCACTTCTGC-1	10XE25	16507	4059	19	F_earlyRG3	F_earlyRG
E25_GACCAATGTAGCACGA-1	10XE25	10018	2801	9	F_earlyRG1	F_earlyRG
E25_GACCTGGCAGACGCTC-1	10XE25	9340	2836	17	F_earlyRG2	F_earlyRG
E25_GACCTGGCAGTTTACG-1	10XE25	2841	1265	9	F_earlyRG1	F_earlyRG
E25_GACCTGGCATGGTCAT-1	10XE25	7322	2308	9	F_earlyRG1	F_earlyRG
E25_GACCTGGGTATATCCG-1	10XE25	9518	2736	11	F_Deep Layer	F_Deep Layer
E25_GACGCGTCACGGACAA-1	10XE25	8609	2713	9	F_earlyRG1	F_earlyRG
E25_GACGCGTCAGACAAAT-1	10XE25	20007	4364	17	F_earlyRG2	F_earlyRG
E25_GACGCGTCAGATGAGC-1	10XE25	9787	2654	11	F_Deep Layer	F_Deep Layer
E25_GACGCGTCATTCACTT-1	10XE25	8104	2505	9	F_earlyRG1	F_earlyRG
E25_GACGCGTTCCCTGACT-1	10XE25	6802	2158	11	F_Deep Layer	F_Deep Layer
E25_GACGCGTTCTGGTATG-1	10XE25	3619	1371	9	F_earlyRG1	F_earlyRG
E25_GACGCGTTCTTAACCT-1	10XE25	2439	1033	9	F_earlyRG1	F_earlyRG
E25_GACGGCTAGTGAACAT-1	10XE25	3124	1344	11	F_Deep Layer	F_Deep Layer
E25_GACGGCTCAATAGAGT-1	10XE25	13695	3373	9	F_earlyRG1	F_earlyRG
E25_GACGGCTCATCGTCGG-1	10XE25	10455	3218	19	F_earlyRG3	F_earlyRG
E25_GACGGCTCATCTCGCT-1	10XE25	13329	3507	17	F_earlyRG2	F_earlyRG
E25_GACGGCTGTCAAAGAT-1	10XE25	10056	2970	9	F_earlyRG1	F_earlyRG
E25_GACGGCTTCATCATTC-1	10XE25	7927	2562	9	F_earlyRG1	F_earlyRG
E25_GACGGCTTCGCGCCAA-1	10XE25	7118	2518	19	F_earlyRG3	F_earlyRG
E25_GACGGCTTCGTGGTCG-1	10XE25	8247	2709	4	F_IPC2	F_IPC
E25_GACGGCTTCTATGTGG-1	10XE25	7161	2236	9	F_earlyRG1	F_earlyRG
E25_GACGTGCAGGCCGAAT-1	10XE25	9075	2756	9	F_earlyRG1	F_earlyRG
E25_GACGTGCCAAACTGTC-1	10XE25	11044	2882	17	F_earlyRG2	F_earlyRG
E25_GACGTGCCATATACGC-1	10XE25	9342	2892	11	F_Deep Layer	F_Deep Layer
E25_GACGTGCCATTTCAGG-1	10XE25	11188	3202	11	F_Deep Layer	F_Deep Layer
E25_GACGTGCGTAAGTTCC-1	10XE25	7297	2283	9	F_earlyRG1	F_earlyRG
E25_GACGTGCGTGCAGACA-1	10XE25	6171	2384	14	F_Upper Layer3	F_Upper Layer
E25_GACGTGCTCAACACAC-1	10XE25	13692	3655	19	F_earlyRG3	F_earlyRG
E25_GACGTGCTCGTTACAG-1	10XE25	11200	3379	19	F_earlyRG3	F_earlyRG
E25_GACGTTAAGAAGGACA-1	10XE25	7442	2309	11	F_Deep Layer	F_Deep Layer
E25_GACGTTAAGAGCTTCT-1	10XE25	8662	2523	9	F_earlyRG1	F_earlyRG
E25_GACGTTAAGTTCGATC-1	10XE25	2579	1181	14	F_Upper Layer3	F_Upper Layer
E25_GACGTTAAGTTCGCAT-1	10XE25	11551	3242	17	F_earlyRG2	F_earlyRG
E25_GACGTTACACAGGAGT-1	10XE25	7309	2428	9	F_earlyRG1	F_earlyRG
E25_GACGTTAGTCGAGTTT-1	10XE25	9590	2703	9	F_earlyRG1	F_earlyRG
E25_GACGTTAGTCTCTCGT-1	10XE25	12042	3367	11	F_Deep Layer	F_Deep Layer
E25_GACGTTATCCAGTATG-1	10XE25	12951	3419	17	F_earlyRG2	F_earlyRG
E25_GACGTTATCCCATTTA-1	10XE25	11272	3047	17	F_earlyRG2	F_earlyRG
E25_GACTAACAGGATGGTC-1	10XE25	6953	2296	11	F_Deep Layer	F_Deep Layer
E25_GACTAACAGGCTACGA-1	10XE25	6232	2136	11	F_Deep Layer	F_Deep Layer
E25_GACTAACCAATGGAAT-1	10XE25	8526	2587	9	F_earlyRG1	F_earlyRG
E25_GACTAACTCATCATTC-1	10XE25	7195	2250	11	F_Deep Layer	F_Deep Layer
E25_GACTAACTCGGCTTGG-1	10XE25	9883	2815	9	F_earlyRG1	F_earlyRG
E25_GACTACACAGGGTATG-1	10XE25	4319	1754	17	F_earlyRG2	F_earlyRG
E25_GACTACACATCGACGC-1	10XE25	3998	1688	9	F_earlyRG1	F_earlyRG
E25_GACTGCGAGTGTCTCA-1	10XE25	10735	3203	19	F_earlyRG3	F_earlyRG
E25_GACTGCGAGTTCGATC-1	10XE25	5714	2160	9	F_earlyRG1	F_earlyRG
E25_GACTGCGCACCTGGTG-1	10XE25	6610	2536	19	F_earlyRG3	F_earlyRG
E25_GACTGCGCAGAGCCAA-1	10XE25	7342	2303	9	F_earlyRG1	F_earlyRG
E25_GACTGCGTCATGTCTT-1	10XE25	1899	1111	19	F_earlyRG3	F_earlyRG
E25_GACTGCGTCGCGATCG-1	10XE25	8641	2857	9	F_earlyRG1	F_earlyRG
E25_GACTGCGTCTGCGGCA-1	10XE25	5221	1964	11	F_Deep Layer	F_Deep Layer
E25_GACTGCGTCTGGTGTA-1	10XE25	9719	2859	11	F_Deep Layer	F_Deep Layer
E25_GACTGCGTCTTGCCGT-1	10XE25	5993	2304	14	F_Upper Layer3	F_Upper Layer
E25_GAGCAGAAGAAGATTC-1	10XE25	2581	1334	14	F_Upper Layer3	F_Upper Layer
E25_GAGCAGAAGGCTAGAC-1	10XE25	4754	1782	17	F_earlyRG2	F_earlyRG
E25_GAGCAGAAGGGAAACA-1	10XE25	15487	3884	19	F_earlyRG3	F_earlyRG
E25_GAGCAGAAGTGGAGAA-1	10XE25	7853	2433	9	F_earlyRG1	F_earlyRG
E25_GAGCAGAGTTAAGATG-1	10XE25	7001	2309	11	F_Deep Layer	F_Deep Layer
E25_GAGCAGAGTTCCCTTG-1	10XE25	17835	982	25	F_unknown	F_unknown
E25_GAGGTGAAGTCATCCA-1	10XE25	11493	3270	11	F_Deep Layer	F_Deep Layer
E25_GAGGTGACAAGTTGTC-1	10XE25	8050	2527	17	F_earlyRG2	F_earlyRG
E25_GAGGTGACATGGGAAC-1	10XE25	3134	1325	9	F_earlyRG1	F_earlyRG
E25_GAGGTGAGTACCATCA-1	10XE25	12088	3343	17	F_earlyRG2	F_earlyRG
E25_GAGGTGAGTATAAACG-1	10XE25	8871	2801	9	F_earlyRG1	F_earlyRG
[truncated: 28,235 more rows]

## Sheet: D. Cluster_markers
gene	p_val	avg_logFC	pct.1	pct.2	p_val_adj	cluster
HMGA2	0	1.36801	0.892	0.094	0	F_earlyRG1
LDHA	0	1.29115	0.983	0.519	0	F_earlyRG1
ENO1	0	1.22628	0.996	0.705	0	F_earlyRG1
BNIP3	0	1.15208	0.924	0.39	0	F_earlyRG1
LIX1	0	1.14765	0.787	0.062	0	F_earlyRG1
TPI1	0	1.09375	0.986	0.577	0	F_earlyRG1
GAPDH	0	1.05045	1	0.85	0	F_earlyRG1
RPL22L1	0	1.04516	0.988	0.539	0	F_earlyRG1
FAM162A	0	1.00916	0.905	0.394	0	F_earlyRG1
HMGA1	0	0.9602	0.908	0.279	0	F_earlyRG1
CCND1	0	0.955921	0.774	0.105	0	F_earlyRG1
HES5	0	0.945999	0.9	0.23	0	F_earlyRG1
VIM	0	0.931154	0.999	0.457	0	F_earlyRG1
RPL5	0	0.928954	1	0.86	0	F_earlyRG1
LHX2	0	0.916315	0.928	0.393	0	F_earlyRG1
FOXG1	0	0.907467	1	0.749	0	F_earlyRG1
RPL8	0	0.875028	1	0.872	0	F_earlyRG1
PGAM1	0	0.858017	0.967	0.533	0	F_earlyRG1
RPS7	0	0.853081	1	0.963	0	F_earlyRG1
MIF	0	0.852099	1	0.853	0	F_earlyRG1
TYMS	0	0.845197	0.867	0.25	0	F_earlyRG1
NAP1L1	0	0.818535	0.999	0.735	0	F_earlyRG1
RPL4	0	0.813071	1	0.855	0	F_earlyRG1
RPL3	0	0.812464	1	0.926	0	F_earlyRG1
PPIC	0	0.805311	0.844	0.229	0	F_earlyRG1
RPL10A	0	0.801382	1	0.931	0	F_earlyRG1
EMX2	0	0.801206	0.893	0.311	0	F_earlyRG1
NPM1	0	0.800386	0.994	0.714	0	F_earlyRG1
RPS3	0	0.795994	1	0.9	0	F_earlyRG1
RAN	0	0.791325	0.999	0.7	0	F_earlyRG1
RPL12	0	0.786303	1	0.881	0	F_earlyRG1
RPSA	0	0.784452	0.999	0.785	0	F_earlyRG1
EEF1A1	0	0.784167	1	0.979	0	F_earlyRG1
FABP3	0	0.78304	0.838	0.269	0	F_earlyRG1
PGK1	0	0.77333	0.818	0.313	0	F_earlyRG1
GLI3	0	0.770512	0.807	0.192	0	F_earlyRG1
RPS8	0	0.752127	1	0.956	0	F_earlyRG1
EEF1G	0	0.749827	1	0.926	0	F_earlyRG1
HSP90AB1	0	0.743687	0.998	0.823	0	F_earlyRG1
RPL13	0	0.739751	1	0.966	0	F_earlyRG1
PRDX4	0	0.718626	0.874	0.314	0	F_earlyRG1
HSPD1	0	0.71617	0.936	0.422	0	F_earlyRG1
CRABP2	0	0.7156	0.509	0.031	0	F_earlyRG1
GLO1	0	0.710122	0.91	0.383	0	F_earlyRG1
RPL6	0	0.70873	1	0.948	0	F_earlyRG1
NACA	0	0.703812	1	0.933	0	F_earlyRG1
RPS10	0	0.689578	1	0.933	0	F_earlyRG1
HMGN1	0	0.685618	0.998	0.818	0	F_earlyRG1
RPL9	0	0.68341	1	0.978	0	F_earlyRG1
RPS6	0	0.679175	1	0.967	0	F_earlyRG1
PCNA	0	0.678948	0.808	0.286	0	F_earlyRG1
UNG	0	0.671293	0.58	0.091	0	F_earlyRG1
RPL24	0	0.669645	1	0.874	0	F_earlyRG1
RPL10	0	0.667171	1	0.979	0	F_earlyRG1
RPL26	0	0.66559	1	0.968	0	F_earlyRG1
RPS18	0	0.663409	1	0.977	0	F_earlyRG1
RPS17	0	0.659039	1	0.964	0	F_earlyRG1
RPS3A	0	0.656143	1	0.978	0	F_earlyRG1
RPS5	0	0.655099	1	0.932	0	F_earlyRG1
RPS12	0	0.653769	1	0.971	0	F_earlyRG1
RPL18A	0	0.650744	1	0.951	0	F_earlyRG1
HEY1	0	0.649135	0.626	0.149	0	F_earlyRG1
RPS11	0	0.645063	1	0.968	0	F_earlyRG1
RPL7	0	0.639655	1	0.979	0	F_earlyRG1
GNB2L1	0	0.637369	0.999	0.869	0	F_earlyRG1
RPL14	0	0.634113	0.998	0.826	0	F_earlyRG1
MSRB3	0	0.622921	0.509	0.057	0	F_earlyRG1
CREB5	0	0.619418	0.626	0.128	0	F_earlyRG1
NME4	0	0.615228	0.812	0.284	0	F_earlyRG1
RPS15A	0	0.607328	1	0.977	0	F_earlyRG1
DACH1	0	0.602582	0.676	0.182	0	F_earlyRG1
RPLP2	0	0.598439	1	0.931	0	F_earlyRG1
RPL23	0	0.593337	1	0.946	0	F_earlyRG1
RPS4X	0	0.593152	1	0.976	0	F_earlyRG1
RPS20	0	0.592702	1	0.984	0	F_earlyRG1
RPS27A	0	0.591943	1	0.985	0	F_earlyRG1
RPL13A	0	0.579191	1	0.979	0	F_earlyRG1
PAICS	0	0.57687	0.741	0.226	0	F_earlyRG1
RPL7A	0	0.573903	1	0.983	0	F_earlyRG1
FLRT3	0	0.566219	0.482	0.086	0	F_earlyRG1
EMX1	0	0.565149	0.724	0.207	0	F_earlyRG1
PSAT1	0	0.564349	0.644	0.162	0	F_earlyRG1
RPS24	0	0.560858	1	0.974	0	F_earlyRG1
MPF26.11189.gene	0	0.560661	0.681	0.172	0	F_earlyRG1
RPL27A	0	0.55706	1	0.967	0	F_earlyRG1
NMRAL1	0	0.555941	0.655	0.181	0	F_earlyRG1
FAM60A	0	0.547676	0.647	0.171	0	F_earlyRG1
RPL29	0	0.545991	1	0.935	0	F_earlyRG1
FEZF2	0	0.543094	0.613	0.154	0	F_earlyRG1
RPLP0	0	0.538908	1	0.98	0	F_earlyRG1
MCM6	0	0.532928	0.612	0.151	0	F_earlyRG1
RPL11	0	0.532793	1	0.951	0	F_earlyRG1
RPLP1.BLAST.MPF26.7485	0	0.531483	1	0.981	0	F_earlyRG1
RPL19	0	0.528828	1	0.962	0	F_earlyRG1
SDR16C5	0	0.524612	0.434	0.04	0	F_earlyRG1
THBS3	0	0.524223	0.709	0.209	0	F_earlyRG1
RPS26	0	0.523304	1	0.919	0	F_earlyRG1
TEAD2	0	0.523072	0.704	0.199	0	F_earlyRG1
MCM4	0	0.518299	0.481	0.073	0	F_earlyRG1
RPS16	0	0.517702	1	0.938	0	F_earlyRG1
MPF26.19411.gene	0	0.503713	0.699	0.196	0	F_earlyRG1
RPS13	0	0.503669	1	0.928	0	F_earlyRG1
NES	0	0.501167	0.518	0.103	0	F_earlyRG1
RPL17.BLAST.MPF26.370	0	0.494766	1	0.972	0	F_earlyRG1
RPS15.BLAST.MPF26.26393	0	0.494046	1	0.996	0	F_earlyRG1
RPL28	0	0.492554	1	0.963	0	F_earlyRG1
PDK1	0	0.481037	0.508	0.112	0	F_earlyRG1
RPL32	0	0.480715	1	0.963	0	F_earlyRG1
NDUFA4L2	0	0.480264	0.278	0.033	0	F_earlyRG1
RPS23	0	0.475129	1	0.956	0	F_earlyRG1
TNFRSF19	0	0.457341	0.501	0.105	0	F_earlyRG1
RPL27	0	0.44613	1	0.951	0	F_earlyRG1
RPL35	0	0.443922	1	0.982	0	F_earlyRG1
MPF26.11376.gene	0	0.441413	0.469	0.1	0	F_earlyRG1
RPL21	0	0.436156	1	0.987	0	F_earlyRG1
CDCA7L	0	0.417501	0.463	0.099	0	F_earlyRG1
PDLIM1	0	0.406126	0.415	0.076	0	F_earlyRG1
SLC16A3.2nd-hit	0	0.404851	0.288	0.015	0	F_earlyRG1
PLAG1	0	0.390303	0.373	0.053	0	F_earlyRG1
RPS19	0	0.385216	1	0.99	0	F_earlyRG1
MPF26.15827.gene	0	0.372812	0.381	0.069	0	F_earlyRG1
B3GNT4	0	0.353911	0.281	0.034	0	F_earlyRG1
MPF26.3472.gene	0	0.335935	0.365	0.062	0	F_earlyRG1
MYCN	0	0.335659	0.337	0.054	0	F_earlyRG1
MPF26.12123.gene	0	0.311492	0.266	0.025	0	F_earlyRG1
LTBP4	0	0.304618	0.289	0.038	0	F_earlyRG1
COL2A1	0	0.299237	0.251	0.025	0	F_earlyRG1
KIAA0101	0	1.33692	0.997	0.225	0	F_earlyRG2
HMGA2	0	1.25839	0.937	0.108	0	F_earlyRG2
PCNA	0	1.16642	0.964	0.293	0	F_earlyRG2
DUT	0	1.14707	0.995	0.386	0	F_earlyRG2
HMGA1	0	1.12279	0.975	0.289	0	F_earlyRG2
GAPDH	0	1.05866	1	0.853	0	F_earlyRG2
LIX1	0	1.04421	0.876	0.074	0	F_earlyRG2
SIVA1	0	1.01559	0.973	0.296	0	F_earlyRG2
TYMS	0	0.999448	0.964	0.26	0	F_earlyRG2
RRM2	0	0.919915	0.939	0.256	0	F_earlyRG2
CCND1	0	0.867037	0.831	0.116	0	F_earlyRG2
NMRAL1	0	0.847916	0.92	0.184	0	F_earlyRG2
SPC24	0	0.781514	0.908	0.178	0	F_earlyRG2
HIST1H2BB.BLAST.MPF26.14357	0	0.77034	0.798	0.154	0	F_earlyRG2
PSAT1	0	0.747082	0.839	0.167	0	F_earlyRG2
GINS1	0	0.746846	0.817	0.126	0	F_earlyRG2
AURKB	0	0.734864	0.759	0.116	0	F_earlyRG2
PPIC	0	0.727426	0.918	0.239	0	F_earlyRG2
ORC6	0	0.719054	0.795	0.129	0	F_earlyRG2
SMC2	0	0.711653	0.882	0.19	0	F_earlyRG2
GLI3	0	0.709008	0.879	0.202	0	F_earlyRG2
DCK	0	0.70387	0.861	0.153	0	F_earlyRG2
FEN1	0	0.665366	0.785	0.143	0	F_earlyRG2
RRM1	0	0.663979	0.821	0.171	0	F_earlyRG2
CREB5	0	0.657939	0.763	0.134	0	F_earlyRG2
TUBA1C.BLAST.MPF26.18623	0	0.644511	0.776	0.129	0	F_earlyRG2
MSRB3	0	0.644276	0.657	0.063	0	F_earlyRG2
UHRF1	0	0.643026	0.854	0.198	0	F_earlyRG2
GINS2	0	0.637476	0.74	0.125	0	F_earlyRG2
TNFRSF19	0	0.612669	0.682	0.109	0	F_earlyRG2
RHNO1	0	0.597049	0.801	0.161	0	F_earlyRG2
MAD2L1	0	0.584604	0.757	0.13	0	F_earlyRG2
CCNA2	0	0.570362	0.79	0.122	0	F_earlyRG2
GMNN	0	0.56419	0.737	0.139	0	F_earlyRG2
NES	0	0.558138	0.687	0.107	0	F_earlyRG2
CLSPN	0	0.544401	0.636	0.082	0	F_earlyRG2
RAD51AP1	0	0.544075	0.68	0.107	0	F_earlyRG2
CENPH	0	0.53201	0.76	0.149	0	F_earlyRG2
MCM3	0	0.524299	0.605	0.091	0	F_earlyRG2
CRABP2	0	0.520192	0.497	0.04	0	F_earlyRG2
SDR16C5	0	0.514629	0.533	0.046	0	F_earlyRG2
MIS18A	0	0.514168	0.625	0.087	0	F_earlyRG2
MKI67	0	0.513817	0.647	0.108	0	F_earlyRG2
HELLS	0	0.510731	0.625	0.093	0	F_earlyRG2
CDCA7L	0	0.486536	0.619	0.103	0	F_earlyRG2
CHAF1A	0	0.478435	0.567	0.081	0	F_earlyRG2
DSN1	0	0.477441	0.65	0.102	0	F_earlyRG2
OIP5	0	0.469799	0.539	0.069	0	F_earlyRG2
PLAG1	0	0.456053	0.517	0.056	0	F_earlyRG2
ASF1B	0	0.43916	0.553	0.082	0	F_earlyRG2
MYBL2	0	0.438704	0.52	0.063	0	F_earlyRG2
EXO1	0	0.431505	0.486	0.052	0	F_earlyRG2
PDLIM1	0	0.422915	0.531	0.08	0	F_earlyRG2
POLQ	0	0.421769	0.502	0.058	0	F_earlyRG2
CENPW	0	0.419311	0.613	0.101	0	F_earlyRG2
TOP2A	0	0.410398	0.697	0.114	0	F_earlyRG2
RAD51	0	0.409447	0.464	0.049	0	F_earlyRG2
DTL	0	0.388975	0.451	0.051	0	F_earlyRG2
DSCC1	0	0.385592	0.489	0.063	0	F_earlyRG2
CDC6	0	0.384742	0.425	0.039	0	F_earlyRG2
CNTNAP2	0	0.35357	0.445	0.053	0	F_earlyRG2
COL2A1	0	0.348514	0.37	0.026	0	F_earlyRG2
E2F8	0	0.337524	0.373	0.028	0	F_earlyRG2
LTBP4	0	0.319296	0.379	0.041	0	F_earlyRG2
UBE2C	0	0.275175	0.806	0.162	0	F_earlyRG2
CDC45	0	0.25286	0.287	0.023	0	F_earlyRG2
CKS2.BLAST.MPF26.793	0	1.86825	0.991	0.322	0	F_earlyRG3
UBE2C	0	1.74095	0.945	0.164	0	F_earlyRG3
CDCA3	0	1.54513	0.998	0.172	0	F_earlyRG3
CENPF	0	1.5271	0.884	0.154	0	F_earlyRG3
CCNB1	0	1.52411	0.937	0.112	0	F_earlyRG3
CDC20	0	1.51188	0.954	0.092	0	F_earlyRG3
PTTG1	0	1.43525	0.978	0.139	0	F_earlyRG3
CCNB2	0	1.38522	0.904	0.086	0	F_earlyRG3
HMGA2	0	1.36805	0.932	0.113	0	F_earlyRG3
CCNA2	0	1.32299	0.888	0.124	0	F_earlyRG3
AURKB	0	1.19373	0.895	0.118	0	F_earlyRG3
NUSAP1	0	1.14063	0.748	0.104	0	F_earlyRG3
NDE1	0	1.09606	0.875	0.142	0	F_earlyRG3
TPX2	0	1.09447	0.867	0.121	0	F_earlyRG3
CENPE	0	1.0668	0.803	0.089	0	F_earlyRG3
KNSTRN	0	1.06367	0.849	0.094	0	F_earlyRG3
MKI67	0	1.01078	0.834	0.109	0	F_earlyRG3
KIF22	0	1.00636	0.91	0.163	0	F_earlyRG3
ASPM	0	0.988878	0.849	0.131	0	F_earlyRG3
KPNA2	0	0.964661	0.689	0.067	0	F_earlyRG3
RHNO1	0	0.953644	0.886	0.164	0	F_earlyRG3
DEPDC1B	0	0.944978	0.792	0.077	0	F_earlyRG3
H2AC4.BLAST.MPF26.11147	0	0.933539	0.88	0.187	0	F_earlyRG3
SGOL1	0	0.901893	0.722	0.09	0	F_earlyRG3
SPC24	0	0.900749	0.899	0.182	0	F_earlyRG3
DLGAP5	0	0.898778	0.751	0.064	0	F_earlyRG3
LIX1	0	0.885179	0.772	0.08	0	F_earlyRG3
FAM64A	0	0.859872	0.786	0.094	0	F_earlyRG3
NEK2	0	0.858501	0.652	0.049	0	F_earlyRG3
KIF23.BLAST.MPF26.24921	0	0.849011	0.7	0.073	0	F_earlyRG3
SGOL2	0	0.839089	0.713	0.085	0	F_earlyRG3
CENPA	0	0.837858	0.818	0.129	0	F_earlyRG3
PLK1	0	0.817057	0.659	0.072	0	F_earlyRG3
PRC1	0	0.81	0.753	0.092	0	F_earlyRG3
TUBA1C.BLAST.MPF26.5522	0	0.799882	0.711	0.11	0	F_earlyRG3
KIF11	0	0.799106	0.722	0.082	0	F_earlyRG3
KIF20B	0	0.794686	0.737	0.11	0	F_earlyRG3
PRR11	0	0.765197	0.698	0.059	0	F_earlyRG3
NDC80	0	0.753956	0.702	0.077	0	F_earlyRG3
NCAPG	0	0.708633	0.687	0.088	0	F_earlyRG3
GTSE1	0	0.703324	0.722	0.113	0	F_earlyRG3
TACC3	0	0.695919	0.687	0.082	0	F_earlyRG3
NUF2	0	0.673921	0.744	0.1	0	F_earlyRG3
INCENP	0	0.661738	0.619	0.076	0	F_earlyRG3
LBR	0	0.653698	0.694	0.106	0	F_earlyRG3
FAM83D	0	0.643049	0.519	0.034	0	F_earlyRG3
ECT2	0	0.640863	0.621	0.048	0	F_earlyRG3
ARHGAP11A	0	0.616002	0.584	0.056	0	F_earlyRG3
CASC5	0	0.607244	0.619	0.066	0	F_earlyRG3
KIF15	0	0.602213	0.611	0.079	0	F_earlyRG3
HMMR	0	0.589966	0.562	0.051	0	F_earlyRG3
BUB1B	0	0.58674	0.575	0.051	0	F_earlyRG3
CDCA8	0	0.576089	0.54	0.047	0	F_earlyRG3
PSRC1	0	0.556631	0.593	0.067	0	F_earlyRG3
BORA	0	0.536534	0.521	0.035	0	F_earlyRG3
BIRC5	0	0.535133	0.586	0.066	0	F_earlyRG3
MSRB3	0	0.534416	0.547	0.068	0	F_earlyRG3
CEP70	0	0.526782	0.571	0.074	0	F_earlyRG3
TROAP	0	0.517716	0.497	0.045	0	F_earlyRG3
KIF2C	0	0.506589	0.51	0.04	0	F_earlyRG3
HJURP	0	0.504861	0.492	0.042	0	F_earlyRG3
CDKN3	0	0.491627	0.499	0.053	0	F_earlyRG3
BUB1	0	0.487979	0.508	0.045	0	F_earlyRG3
KIF20A	0	0.486738	0.495	0.041	0	F_earlyRG3
KIFC1	0	0.477122	0.514	0.056	0	F_earlyRG3
NCAPD2	0	0.469895	0.536	0.064	0	F_earlyRG3
KIF18A	0	0.463602	0.477	0.034	0	F_earlyRG3
AURKA	0	0.457716	0.468	0.042	0	F_earlyRG3
FOXM1	0	0.446271	0.51	0.059	0	F_earlyRG3
CDCA2	0	0.437032	0.435	0.033	0	F_earlyRG3
SKA3	0	0.436682	0.481	0.052	0	F_earlyRG3
TTK	0	0.416184	0.44	0.042	0	F_earlyRG3
COL2A1	0	0.406424	0.392	0.028	0	F_earlyRG3
CEP55	0	0.371274	0.4	0.036	0	F_earlyRG3
REEP4	0	0.340831	0.387	0.033	0	F_earlyRG3
CCNB3	0	0.301599	0.309	0.02	0	F_earlyRG3
PIF1	0	0.28943	0.311	0.021	0	F_earlyRG3
VIM	0	1.61153	0.98	0.451	0	F_midRG
HES5	0	1.48033	0.782	0.229	0	F_midRG
LYPD1	0	1.36275	0.935	0.281	0	F_midRG
SFRP1	0	1.11741	0.83	0.264	0	F_midRG
HOPX	0	1.01178	0.704	0.211	0	F_midRG
EFNB1	0	0.919947	0.82	0.321	0	F_midRG
HMGN3	0	0.862174	0.988	0.648	0	F_midRG
FABP7	0	0.860675	1	0.89	0	F_midRG
PON2	0	0.852117	0.823	0.378	0	F_midRG
FGFBP3	0	0.845627	0.449	0.095	0	F_midRG
GAPDH	0	0.818275	0.998	0.849	0	F_midRG
GLI3	0	0.804746	0.635	0.193	0	F_midRG
SLC1A3	0	0.777063	0.802	0.228	0	F_midRG
RPS24.BLAST.MPF26.3521	0	0.744944	0.944	0.613	0	F_midRG
MPF26.21780.gene	0	0.720324	0.504	0.136	0	F_midRG
SOX2	0	0.715675	0.938	0.442	0	F_midRG
NAP1L1	0	0.681906	0.978	0.733	0	F_midRG
TMEM132B.BLAST.MPF26.23066	0	0.67615	0.609	0.199	0	F_midRG
PTN	0	0.627032	0.941	0.495	0	F_midRG
RPL8	0	0.621096	0.996	0.871	0	F_midRG
RPS7	0	0.451918	0.999	0.962	0	F_midRG
RPL13	0	0.443914	1	0.966	0	F_midRG
PPIA	0	0.410459	0.999	0.991	0	F_midRG
GDPD2	0	2.30348	0.919	0.15	0	F_lateRG1
PPAP2B	0	1.80057	0.872	0.207	0	F_lateRG1
ACBD7	0	1.764	0.891	0.348	0	F_lateRG1
SLC1A3	0	1.73883	0.899	0.191	0	F_lateRG1
PTN	0	1.70871	0.977	0.47	0	F_lateRG1
DBI	0	1.67577	0.983	0.743	0	F_lateRG1
ALDOC	0	1.58877	0.85	0.276	0	F_lateRG1
NDRG2	0	1.53126	0.861	0.288	0	F_lateRG1
FABP7	0	1.44947	0.998	0.886	0	F_lateRG1
MPF26.13406.gene	0	1.42327	0.746	0.198	0	F_lateRG1
TSPAN7	0	1.40431	0.91	0.39	0	F_lateRG1
MMD	0	1.3968	0.821	0.354	0	F_lateRG1
MPF26.21932.gene	0	1.38412	0.603	0.11	0	F_lateRG1
TTYH1	0	1.33688	0.667	0.167	0	F_lateRG1
CLU	0	1.3334	0.571	0.082	0	F_lateRG1
NCAN	0	1.29599	0.752	0.284	0	F_lateRG1
S100A1	0	1.29448	0.606	0.11	0	F_lateRG1
PTPRZ1	0	1.25092	0.76	0.247	0	F_lateRG1
ATP1B2	0	1.24918	0.657	0.134	0	F_lateRG1
RGS20	0	1.22119	0.695	0.192	0	F_lateRG1
NFE2L2	0	1.21533	0.722	0.185	0	F_lateRG1
SOX2	0	1.20382	0.949	0.418	0	F_lateRG1
ENHO	0	1.19425	0.685	0.178	0	F_lateRG1
SPARCL1	0	1.14774	0.667	0.139	0	F_lateRG1
TNC	0	1.14084	0.482	0.087	0	F_lateRG1
SCRG1	0	1.12451	0.636	0.108	0	F_lateRG1
GJA1	0	1.10785	0.514	0.092	0	F_lateRG1
MFGE8	0	1.08632	0.432	0.057	0	F_lateRG1
ATP1A2	0	1.07974	0.522	0.095	0	F_lateRG1
AQP4	0	1.07225	0.486	0.048	0	F_lateRG1
CSDC2	0	1.0614	0.577	0.151	0	F_lateRG1
GPM6B	0	1.06138	0.865	0.498	0	F_lateRG1
GCA	0	1.04562	0.62	0.176	0	F_lateRG1
TMEM132B.BLAST.MPF26.23066	0	1.04068	0.597	0.181	0	F_lateRG1
PEG3	0	1.01223	0.888	0.492	0	F_lateRG1
RFTN2	0	1.01185	0.497	0.071	0	F_lateRG1
HTRA1	0	1.0106	0.443	0.134	0	F_lateRG1
SLITRK2	0	1.01022	0.58	0.153	0	F_lateRG1
ADORA2B	0	1.00296	0.453	0.064	0	F_lateRG1
BCAN	0	0.995199	0.527	0.085	0	F_lateRG1
QKI	0	0.989341	0.812	0.4	0	F_lateRG1
SPRY2	0	0.988373	0.395	0.073	0	F_lateRG1
GLUD1	0	0.987134	0.558	0.163	0	F_lateRG1
SFXN5	0	0.983564	0.507	0.128	0	F_lateRG1
PON2	0	0.979815	0.791	0.36	0	F_lateRG1
RASGRP2	0	0.979178	0.548	0.145	0	F_lateRG1
MPF26.7625.gene	0	0.975647	0.978	0.757	0	F_lateRG1
GLUL	0	0.972195	0.761	0.464	0	F_lateRG1
TRIM9	0	0.966459	0.463	0.067	0	F_lateRG1
MLC1	0	0.964031	0.479	0.1	0	F_lateRG1
ZFHX4	0	0.963622	0.668	0.259	0	F_lateRG1
HMGN3	0	0.949467	0.957	0.635	0	F_lateRG1
ID4.BLAST.MPF26.20004	0	0.946469	0.714	0.297	0	F_lateRG1
CSPG5	0	0.946212	0.416	0.071	0	F_lateRG1
RARRES2	0	0.944124	0.679	0.183	0	F_lateRG1
SLC7A11	0	0.934036	0.412	0.04	0	F_lateRG1
GPR75	0	0.931705	0.435	0.064	0	F_lateRG1
NOTCH2	0	0.923247	0.465	0.104	0	F_lateRG1
FOS	0	0.923129	0.425	0.121	0	F_lateRG1
SCD	0	0.921602	0.548	0.216	0	F_lateRG1
LUZP2.BLAST.MPF26.17681	0	0.919311	0.435	0.09	0	F_lateRG1
TSC22D4	0	0.917613	0.52	0.137	0	F_lateRG1
ARHGAP5	0	0.911786	0.609	0.236	0	F_lateRG1
ACYP2	0	0.900632	0.486	0.128	0	F_lateRG1
SOX9	0	0.896116	0.608	0.216	0	F_lateRG1
LHX2	0	0.881892	0.77	0.377	0	F_lateRG1
HMGCS1	0	0.874645	0.674	0.33	0	F_lateRG1
MFAP2	0	0.873368	0.728	0.346	0	F_lateRG1
HS3ST1	0	0.870243	0.527	0.145	0	F_lateRG1
HRSP12	0	0.869294	0.586	0.24	0	F_lateRG1
JAM2	0	0.868911	0.717	0.337	0	F_lateRG1
MGST1	0	0.858765	0.447	0.099	0	F_lateRG1
KITLG	0	0.857826	0.393	0.055	0	F_lateRG1
NMNAT2	0	0.85739	0.593	0.229	0	F_lateRG1
CNN3	0	0.854763	0.784	0.483	0	F_lateRG1
SERPINE2	0	0.849434	0.547	0.186	0	F_lateRG1
LRIG1	0	0.848077	0.443	0.101	0	F_lateRG1
GSN	0	0.847392	0.424	0.081	0	F_lateRG1
MPF26.15492.gene	0	0.844346	0.491	0.173	0	F_lateRG1
NRXN1	0	0.843978	0.518	0.148	0	F_lateRG1
PTGFRN	0	0.84328	0.521	0.176	0	F_lateRG1
AKAP7	0	0.842362	0.539	0.198	0	F_lateRG1
GNG5	0	0.841124	0.8	0.445	0	F_lateRG1
ETV1	0	0.839502	0.486	0.112	0	F_lateRG1
ZBTB20	0	0.831465	0.841	0.467	0	F_lateRG1
PGRMC1	0	0.830519	0.875	0.596	0	F_lateRG1
LYPD1	0	0.814481	0.743	0.271	0	F_lateRG1
CPE	0	0.814153	0.775	0.519	0	F_lateRG1
MPF26.13076.gene	0	0.809993	0.522	0.163	0	F_lateRG1
DKK3	0	0.800792	0.453	0.136	0	F_lateRG1
TST	0	0.798411	0.435	0.12	0	F_lateRG1
TRIL	0	0.798084	0.335	0.035	0	F_lateRG1
MPF26.21619.gene	0	0.794861	0.379	0.089	0	F_lateRG1
NPAS3	0	0.794781	0.487	0.137	0	F_lateRG1
MSMO1	0	0.791577	0.582	0.29	0	F_lateRG1
EMID1	0	0.790236	0.41	0.093	0	F_lateRG1
ANXA5	0	0.784632	0.496	0.181	0	F_lateRG1
SMPDL3A	0	0.78096	0.363	0.068	0	F_lateRG1
GPAM	0	0.777459	0.42	0.111	0	F_lateRG1
CMTM5	0	0.773564	0.396	0.073	0	F_lateRG1
ADD3	0	0.771686	0.444	0.124	0	F_lateRG1
SOX6	0	0.768377	0.59	0.236	0	F_lateRG1
IQCJ-SCHIP1.BLAST.MPF26.5741	0	0.762037	0.731	0.389	0	F_lateRG1
ZFP36L1	0	0.757287	0.724	0.343	0	F_lateRG1
APC	0	0.756582	0.651	0.348	0	F_lateRG1
SCRN1	0	0.752837	0.466	0.165	0	F_lateRG1
MGLL	0	0.749202	0.38	0.08	0	F_lateRG1
BBOX1.2nd-hit	0	0.739281	0.324	0.038	0	F_lateRG1
AZIN1	0	0.738291	0.667	0.379	0	F_lateRG1
KLF3	0	0.737938	0.551	0.25	0	F_lateRG1
PXDC1	0	0.737856	0.368	0.07	0	F_lateRG1
FGFR2	0	0.736476	0.39	0.097	0	F_lateRG1
NRARP.BLAST.MPF26.23647	0	0.733913	0.369	0.123	0	F_lateRG1
MMD2	0	0.730056	0.324	0.051	0	F_lateRG1
DDAH1	0	0.7242	0.352	0.064	0	F_lateRG1
AIF1L	0	0.722462	0.651	0.305	0	F_lateRG1
FADS2	0	0.720683	0.464	0.192	0	F_lateRG1
PAX6	0	0.720321	0.657	0.31	0	F_lateRG1
ROBO1	0	0.720164	0.454	0.157	0	F_lateRG1
HEPACAM	0	0.716772	0.356	0.064	0	F_lateRG1
MPF26.19411.gene	0	0.713402	0.493	0.187	0	F_lateRG1
LITAF	0	0.708523	0.523	0.219	0	F_lateRG1
WISP1	0	0.704205	0.309	0.03	0	F_lateRG1
LSAMP	0	0.699687	0.438	0.142	0	F_lateRG1
COL9A3	0	0.697026	0.427	0.16	0	F_lateRG1
MDK	0	0.692521	0.832	0.481	0	F_lateRG1
MPF26.25345.gene	0	0.689556	0.391	0.08	0	F_lateRG1
SDC2	0	0.682367	0.381	0.122	0	F_lateRG1
S1PR1	0	0.681632	0.306	0.056	0	F_lateRG1
SLC38A3	0	0.681174	0.325	0.059	0	F_lateRG1
CTNND2	0	0.680723	0.456	0.174	0	F_lateRG1
TIMP3	0	0.679095	0.312	0.051	0	F_lateRG1
GOLGA7	0	0.677337	0.756	0.492	0	F_lateRG1
CTHRC1	0	0.675265	0.557	0.251	0	F_lateRG1
NTRK2	0	0.673097	0.335	0.092	0	F_lateRG1
NFIA	0	0.670903	0.885	0.592	0	F_lateRG1
RHOC	0	0.66883	0.447	0.152	0	F_lateRG1
SLC9A3R1	0	0.663506	0.403	0.138	0	F_lateRG1
RALYL	0	0.662721	0.315	0.075	0	F_lateRG1
CHCHD2	0	0.662038	0.931	0.797	0	F_lateRG1
SLMO1	0	0.655308	0.409	0.149	0	F_lateRG1
MACIR.BLAST.MPF26.15255	0	0.651222	0.496	0.212	0	F_lateRG1
B3GALNT1	0	0.648148	0.53	0.239	0	F_lateRG1
NR2E1	0	0.623243	0.371	0.125	0	F_lateRG1
PDLIM3	0	0.61288	0.329	0.087	0	F_lateRG1
PARM1	0	0.5968	0.263	0.052	0	F_lateRG1
IQGAP2	0	0.592824	0.314	0.091	0	F_lateRG1
MPF26.23416.gene	0	0.591994	0.933	0.684	0	F_lateRG1
APBB1IP	0	0.585288	0.334	0.087	0	F_lateRG1
VCAM1	0	0.582622	0.254	0.043	0	F_lateRG1
SNTA1	0	0.581315	0.275	0.044	0	F_lateRG1
MPF26.18532.gene	0	0.581068	0.3	0.059	0	F_lateRG1
TMEM47	0	0.579495	0.295	0.076	0	F_lateRG1
SWAP70	0	0.570349	0.266	0.054	0	F_lateRG1
MPF26.24767.gene	0	0.565285	0.309	0.084	0	F_lateRG1
HSPB6	0	0.555146	0.304	0.085	0	F_lateRG1
NRG1	0	0.553539	0.306	0.083	0	F_lateRG1
PLP1	0	0.50075	0.265	0.056	0	F_lateRG1
VIM	0	0.481828	0.879	0.437	0	F_lateRG1
MPF26.13397.gene	0	0.465535	0.407	0.136	0	F_lateRG1
PTTG1	0	1.97074	0.932	0.122	0	F_lateRG2
CDCA3	0	1.96983	0.969	0.155	0	F_lateRG2
CENPF	0	1.82919	0.839	0.139	0	F_lateRG2
UBE2C	0	1.82718	0.798	0.152	0	F_lateRG2
CCNB1	0	1.75123	0.809	0.099	0	F_lateRG2
HMGB2	0	1.74549	0.994	0.435	0	F_lateRG2
CKS2.BLAST.MPF26.793	0	1.7156	0.864	0.312	0	F_lateRG2
CKS2.BLAST.MPF26.13062	0	1.54762	0.63	0.108	0	F_lateRG2
CDC20	0	1.51149	0.772	0.08	0	F_lateRG2
ARL6IP1	0	1.50302	0.958	0.691	0	F_lateRG2
CCNA2	0	1.43085	0.739	0.113	0	F_lateRG2
ASPM	0	1.42784	0.777	0.117	0	F_lateRG2
NUSAP1	0	1.38488	0.649	0.093	0	F_lateRG2
CCNB2	0	1.38256	0.697	0.075	0	F_lateRG2
TPX2	0	1.35934	0.746	0.109	0	F_lateRG2
KNSTRN	0	1.34055	0.748	0.081	0	F_lateRG2
SGOL2	0	1.31691	0.657	0.073	0	F_lateRG2
TOP2A	0	1.30974	0.532	0.111	0	F_lateRG2
GTSE1	0	1.30489	0.678	0.101	0	F_lateRG2
CENPE	0	1.2982	0.715	0.077	0	F_lateRG2
SMC4	0	1.28526	0.817	0.246	0	F_lateRG2
NUCKS1	0	1.28442	0.995	0.731	0	F_lateRG2
LYPD1	0	1.22266	0.904	0.293	0	F_lateRG2
PRC1	0	1.19323	0.648	0.081	0	F_lateRG2
MKI67	0	1.18956	0.696	0.098	0	F_lateRG2
CKAP2	0	1.17847	0.656	0.119	0	F_lateRG2
UBE2S	0	1.17078	0.748	0.196	0	F_lateRG2
KIF22	0	1.14541	0.775	0.152	0	F_lateRG2
H2AFV.BLAST.MPF26.10606	0	1.13025	0.993	0.771	0	F_lateRG2
AURKB	0	1.10045	0.633	0.111	0	F_lateRG2
FAM64A	0	1.08835	0.649	0.084	0	F_lateRG2
NDE1	0	1.08384	0.68	0.133	0	F_lateRG2
VIM	0	1.0832	0.959	0.46	0	F_lateRG2
RHNO1	0	1.07675	0.697	0.155	0	F_lateRG2
SGOL1	0	1.07468	0.56	0.082	0	F_lateRG2
CENPA	0	1.04318	0.684	0.119	0	F_lateRG2
SPC24	0	1.03271	0.762	0.172	0	F_lateRG2
PBK	0	1.02121	0.672	0.115	0	F_lateRG2
NUF2	0	1.00979	0.643	0.089	0	F_lateRG2
KIAA0101	0	1.00472	0.86	0.218	0	F_lateRG2
DLGAP5	0	1.00111	0.562	0.056	0	F_lateRG2
CKS1B.2nd-hit	0	1.00021	0.758	0.242	0	F_lateRG2
CKB	0	0.984578	0.947	0.592	0	F_lateRG2
H2AZ1.BLAST.MPF26.10367	0	0.983221	0.995	0.828	0	F_lateRG2
HOPX	0	0.982358	0.752	0.217	0	F_lateRG2
CDKN2C	0	0.980006	0.613	0.139	0	F_lateRG2
MPF26.21614.gene	0	0.978761	0.971	0.631	0	F_lateRG2
SOX2	0	0.973581	0.984	0.448	0	F_lateRG2
PRADC1	0	0.948579	0.733	0.211	0	F_lateRG2
TRIM59	0	0.939346	0.56	0.107	0	F_lateRG2
HMGN3	0	0.93212	0.975	0.654	0	F_lateRG2
CDK1	0	0.929383	0.52	0.096	0	F_lateRG2
NDC80	0	0.921193	0.551	0.069	0	F_lateRG2
RAD21	0	0.89682	0.88	0.417	0	F_lateRG2
SFRP1	0	0.88086	0.775	0.275	0	F_lateRG2
KIF11	0	0.879846	0.539	0.075	0	F_lateRG2
CDKN3	0	0.866583	0.497	0.044	0	F_lateRG2
KIF23.BLAST.MPF26.24921	0	0.865633	0.502	0.067	0	F_lateRG2
CCDC34	0	0.852386	0.668	0.207	0	F_lateRG2
ACBD7	0	0.850123	0.896	0.38	0	F_lateRG2
MPF26.7625.gene	0	0.840675	0.991	0.77	0	F_lateRG2
TROAP	0	0.838388	0.467	0.036	0	F_lateRG2
PRR11	0	0.835098	0.501	0.053	0	F_lateRG2
TACC3	0	0.81876	0.52	0.075	0	F_lateRG2
HMGB1	0	0.814127	0.992	0.902	0	F_lateRG2
BIRC5	0	0.811669	0.53	0.057	0	F_lateRG2
PTTG1.BLAST.MPF26.25670	0	0.803635	0.479	0.031	0	F_lateRG2
KIF20B	0	0.78784	0.514	0.105	0	F_lateRG2
CENPN	0	0.781154	0.522	0.083	0	F_lateRG2
PSRC1	0	0.775718	0.476	0.06	0	F_lateRG2
RACGAP1	0	0.75192	0.547	0.112	0	F_lateRG2
CKAP5	0	0.750636	0.537	0.105	0	F_lateRG2
SLC1A3	0	0.748391	0.829	0.236	0	F_lateRG2
SCRN1	0	0.737704	0.636	0.177	0	F_lateRG2
CENPW	0	0.704004	0.503	0.097	0	F_lateRG2
ECT2	0	0.703944	0.421	0.043	0	F_lateRG2
DEPDC1B	0	0.702909	0.453	0.074	0	F_lateRG2
KPNA2	0	0.697341	0.391	0.065	0	F_lateRG2
MIS18BP1	0	0.6925	0.395	0.061	0	F_lateRG2
HMMR	0	0.690532	0.413	0.046	0	F_lateRG2
CASC5	0	0.683676	0.426	0.061	0	F_lateRG2
NCAPG	0	0.682165	0.451	0.083	0	F_lateRG2
PLK1	0	0.676332	0.408	0.069	0	F_lateRG2
TRIOBP	0	0.673697	0.451	0.06	0	F_lateRG2
GPSM2	0	0.656083	0.472	0.094	0	F_lateRG2
BUB1B	0	0.650553	0.424	0.045	0	F_lateRG2
DEPDC1	0	0.64209	0.381	0.043	0	F_lateRG2
ARHGAP11A	0	0.639432	0.381	0.052	0	F_lateRG2
KIF15	0	0.629964	0.435	0.074	0	F_lateRG2
INCENP	0	0.627959	0.409	0.071	0	F_lateRG2
CEP55	0	0.623776	0.354	0.029	0	F_lateRG2
FOXM1	0	0.619244	0.387	0.054	0	F_lateRG2
TOP2A.2nd-hit	0	0.604996	0.346	0.053	0	F_lateRG2
CKAP2L	0	0.595622	0.37	0.047	0	F_lateRG2
GAS2L3	0	0.594557	0.369	0.042	0	F_lateRG2
ZWINT	0	0.59112	0.417	0.07	0	F_lateRG2
BUB1	0	0.574925	0.355	0.041	0	F_lateRG2
NEK2	0	0.568968	0.353	0.047	0	F_lateRG2
MXD3	0	0.559575	0.34	0.05	0	F_lateRG2
CDCA8	0	0.558202	0.337	0.044	0	F_lateRG2
KIF2C	0	0.551953	0.343	0.036	0	F_lateRG2
NCAPD2	0	0.548006	0.354	0.06	0	F_lateRG2
ODF2	0	0.537877	0.389	0.059	0	F_lateRG2
MPF26.19448.gene	0	0.535595	0.372	0.046	0	F_lateRG2
AURKA	0	0.524112	0.338	0.037	0	F_lateRG2
KIF18A	0	0.519709	0.297	0.031	0	F_lateRG2
CENPT	0	0.518184	0.361	0.06	0	F_lateRG2
SAPCD2	0	0.515838	0.291	0.027	0	F_lateRG2
MPF26.12738.gene	0	0.509663	0.338	0.055	0	F_lateRG2
KIF20A	0	0.487915	0.312	0.038	0	F_lateRG2
IQGAP3	0	0.485755	0.282	0.039	0	F_lateRG2
BORA	0	0.446937	0.266	0.034	0	F_lateRG2
HJURP	0	0.430873	0.288	0.04	0	F_lateRG2
CDCA2	0	0.421826	0.27	0.031	0	F_lateRG2
REEP4	0	0.416028	0.251	0.03	0	F_lateRG2
KIAA0101	0	1.89017	0.988	0.224	0	F_lateRG3
HOPX	0	1.29811	0.865	0.222	0	F_lateRG3
HMGB2	0	1.25501	0.997	0.443	0	F_lateRG3
DUT	0	1.24396	0.968	0.386	0	F_lateRG3
CKS2.BLAST.MPF26.793	0	1.23648	0.943	0.318	0	F_lateRG3
H2AC4.BLAST.MPF26.11094	0	1.13187	0.592	0.071	0	F_lateRG3
AURKB	0	1.1318	0.758	0.115	0	F_lateRG3
CKS2.BLAST.MPF26.13062	0	1.13065	0.652	0.115	0	F_lateRG3
DCK	0	1.07083	0.785	0.154	0	F_lateRG3
CENPF	0	1.04735	0.816	0.15	0	F_lateRG3
TOP2A	0	1.02998	0.758	0.112	0	F_lateRG3
SMC4	0	1.02173	0.865	0.253	0	F_lateRG3
RHNO1	0	1.00265	0.757	0.161	0	F_lateRG3
SPC24	0	0.975733	0.791	0.179	0	F_lateRG3
H1-2.BLAST.MPF26.11148	0	0.965147	0.575	0.085	0	F_lateRG3
MKI67	0	0.905782	0.641	0.108	0	F_lateRG3
SMC2	0	0.898298	0.772	0.192	0	F_lateRG3
FAM64A	0	0.874608	0.616	0.093	0	F_lateRG3
TUBA1C.BLAST.MPF26.18623	0	0.862474	0.662	0.131	0	F_lateRG3
CCNA2	0	0.855211	0.707	0.122	0	F_lateRG3
TPX2	0	0.853453	0.697	0.119	0	F_lateRG3
CDK2	0	0.841366	0.671	0.133	0	F_lateRG3
GTSE1	0	0.832079	0.663	0.11	0	F_lateRG3
NUSAP1	0	0.827982	0.606	0.102	0	F_lateRG3
GINS1	0	0.827697	0.66	0.129	0	F_lateRG3
SPC25	0	0.825234	0.592	0.086	0	F_lateRG3
UBE2C	0	0.772124	0.807	0.161	0	F_lateRG3
ASF1B	0	0.735635	0.537	0.081	0	F_lateRG3
UBE2T	0	0.735281	0.606	0.118	0	F_lateRG3
CLSPN	0	0.722173	0.523	0.084	0	F_lateRG3
DSN1	0	0.717553	0.564	0.103	0	F_lateRG3
CENPN	0	0.684522	0.521	0.089	0	F_lateRG3
NCAPG2	0	0.684494	0.485	0.068	0	F_lateRG3
MYBL2	0	0.651814	0.471	0.064	0	F_lateRG3
POLQ	0	0.651228	0.458	0.059	0	F_lateRG3
ESCO2	0	0.628074	0.43	0.05	0	F_lateRG3
DIAPH3	0	0.612603	0.42	0.052	0	F_lateRG3
GFAP	0	2.40081	0.68	0.03	0	F_tRG
CRYAB	0	2.20718	0.685	0.02	0	F_tRG
AQP4	0	1.80481	0.736	0.08	0	F_tRG
PCP4.BLAST.MPF26.25785	0	1.67007	0.582	0.05	0	F_tRG
NTRK2	0	1.647	0.714	0.106	0	F_tRG
OGN	0	1.42701	0.533	0.027	0	F_tRG
PLP1	0	1.10951	0.609	0.069	0	F_tRG
CAPS	0	1.07628	0.457	0.037	0	F_tRG
BBOX1.2nd-hit	0	1.02678	0.582	0.057	0	F_tRG
COL9A2	0	0.9661	0.411	0.022	0	F_tRG
ADAMTS8	0	0.859377	0.32	0.015	0	F_tRG
FAM216B	0	0.755565	0.328	0.018	0	F_tRG
FIBIN	0	0.703339	0.335	0.022	0	F_tRG
FOXJ1	0	0.653162	0.298	0.017	0	F_tRG
CLEC18C	0	0.632588	0.271	0.007	0	F_tRG
CAPSL	0	0.571138	0.281	0.016	0	F_tRG
NRN1	0	1.34074	0.736	0.135	0	F_IPC1
EOMES	0	1.28376	0.609	0.108	0	F_IPC1
DDAH2	0	1.26968	0.976	0.595	0	F_IPC1
ELAVL4	0	1.21868	0.865	0.313	0	F_IPC1
CLIC1	0	1.06768	0.805	0.392	0	F_IPC1
SSTR2	0	1.06003	0.471	0.055	0	F_IPC1
TNFAIP8	0	1.04063	0.633	0.115	0	F_IPC1
DCX	0	1.0356	0.93	0.407	0	F_IPC1
NEUROD4	0	0.93516	0.362	0.048	0	F_IPC1
RND3	0	0.910671	0.627	0.271	0	F_IPC1
MLLT3	0	0.870671	0.687	0.215	0	F_IPC1
FBXW7	0	0.851627	0.755	0.318	0	F_IPC1
PRKX	0	0.851289	0.697	0.276	0	F_IPC1
ENC1	0	0.814633	0.731	0.299	0	F_IPC1
RASGEF1B	0	0.813888	0.364	0.053	0	F_IPC1
MPF26.2418.gene	0	0.807717	0.994	0.927	0	F_IPC1
SEZ6	0	0.802765	0.53	0.115	0	F_IPC1
NEUROD1	0	0.788107	0.427	0.086	0	F_IPC1
SOX11	0	0.775726	0.931	0.532	0	F_IPC1
IGFBPL1	0	0.768782	0.601	0.19	0	F_IPC1
MPF26.19010.gene	0	0.746816	0.799	0.369	0	F_IPC1
TAGLN3	0	0.704727	0.757	0.318	0	F_IPC1
NFIB	0	0.687177	0.981	0.781	0	F_IPC1
MPF26.25542.gene	0	0.686696	0.765	0.391	0	F_IPC1
ROBO2	0	0.681505	0.686	0.319	0	F_IPC1
PCBP4	0	0.668237	0.605	0.289	0	F_IPC1
NELL2	0	0.666101	0.592	0.229	0	F_IPC1
TUBB4B.2nd-hit	0	0.663944	0.96	0.62	0	F_IPC1
SMARCD3	0	0.661864	0.578	0.261	0	F_IPC1
MPF26.22413.gene	0	0.652189	0.904	0.607	0	F_IPC1
PTPDC1	0	0.650446	0.379	0.065	0	F_IPC1
NSG2.BLAST.MPF26.4839	0	0.647202	0.798	0.322	0	F_IPC1
BCL11A	0	0.633946	0.695	0.335	0	F_IPC1
EIF3F.BLAST.MPF26.21392	0	0.601734	0.945	0.729	0	F_IPC1
NXPH4	0	0.601042	0.278	0.036	0	F_IPC1
CYTH2	0	0.599662	0.589	0.27	0	F_IPC1
HSP90AB1	0	0.59294	0.98	0.815	0	F_IPC1
MPF26.21979.gene	0	0.590686	0.992	0.906	0	F_IPC1
PLXNA2	0	0.587837	0.446	0.134	0	F_IPC1
TUBB	0	0.572437	0.978	0.797	0	F_IPC1
KCNMB2	0	0.571633	0.381	0.097	0	F_IPC1
RBFOX2	0	0.569128	0.643	0.285	0	F_IPC1
HNRNPDL.2nd-hit	0	0.555461	0.962	0.784	0	F_IPC1
ELAVL3	0	0.550255	0.829	0.471	0	F_IPC1
SLCO5A1	0	0.54796	0.328	0.07	0	F_IPC1
KIAA1644	0	0.535273	0.291	0.055	0	F_IPC1
GNG2.BLAST.MPF26.2574	0	0.534461	0.874	0.538	0	F_IPC1
EEF2	0	0.531242	0.99	0.887	0	F_IPC1
SCRT2	0	0.530752	0.336	0.074	0	F_IPC1
NEUROD2	0	0.524147	0.71	0.266	0	F_IPC1
L1CAM	0	0.517344	0.37	0.106	0	F_IPC1
GPC2	0	0.513032	0.351	0.093	0	F_IPC1
STMN2	0	0.511507	0.86	0.423	0	F_IPC1
EEF1A1	0	0.508529	1	0.978	0	F_IPC1
GABPB2	0	0.483702	0.971	0.559	0	F_IPC1
H3F3A	0	0.423375	0.998	0.955	0	F_IPC1
H3F3B	0	0.411975	0.998	0.972	0	F_IPC1
SLC25A6	0	0.387594	0.996	0.95	0	F_IPC1
RPL10	0	0.36577	0.999	0.978	0	F_IPC1
KIAA0101	0	1.51131	0.775	0.206	0	F_IPC2
PCNA	0	1.44904	0.844	0.271	0	F_IPC2
TYMS	0	1.26114	0.812	0.239	0	F_IPC2
MPF26.21614.gene	0	1.13758	0.943	0.624	0	F_IPC2
RRM2	0	1.12614	0.745	0.239	0	F_IPC2
HMGB2	0	1.10685	0.917	0.425	0	F_IPC2
DUT	0	1.10486	0.792	0.373	0	F_IPC2
UHRF1	0	1.02813	0.67	0.181	0	F_IPC2
EOMES	0	1.02036	0.604	0.122	0	F_IPC2
CTHRC1	0	1.01107	0.746	0.248	0	F_IPC2
H2AZ1.BLAST.MPF26.10367	0	1.0067	0.988	0.824	0	F_IPC2
HES6	0	0.966918	0.846	0.429	0	F_IPC2
NEUROG1	0	0.945841	0.275	0.017	0	F_IPC2
DCK	0	0.937657	0.574	0.141	0	F_IPC2
ASCL1.BLAST.MPF26.27130	0	0.931032	0.622	0.208	0	F_IPC2
CDK6	0	0.928494	0.69	0.244	0	F_IPC2
NEUROG2	0	0.927354	0.48	0.139	0	F_IPC2
CLSPN	0	0.870554	0.473	0.068	0	F_IPC2
ORC6	0	0.866914	0.531	0.117	0	F_IPC2
H2AC4.BLAST.MPF26.11094	0	0.863139	0.332	0.066	0	F_IPC2
SMC2	0	0.853018	0.587	0.179	0	F_IPC2
CENPH	0	0.852589	0.551	0.136	0	F_IPC2
SIVA1	0	0.816041	0.718	0.283	0	F_IPC2
CDCA7	0	0.809275	0.514	0.122	0	F_IPC2
DEK	0	0.803391	0.904	0.574	0	F_IPC2
MCM6	0	0.796749	0.53	0.145	0	F_IPC2
CDK2	0	0.792857	0.534	0.119	0	F_IPC2
TUBA1C.BLAST.MPF26.18623	0	0.779149	0.486	0.12	0	F_IPC2
ANP32B	0	0.776915	0.843	0.462	0	F_IPC2
TMPO	0	0.776514	0.831	0.43	0	F_IPC2
RANBP1	0	0.776386	0.852	0.463	0	F_IPC2
GINS1	0	0.757918	0.501	0.117	0	F_IPC2
DHFR	0	0.75465	0.588	0.188	0	F_IPC2
RNASEH2B	0	0.75451	0.723	0.337	0	F_IPC2
DNMT1	0	0.753024	0.668	0.265	0	F_IPC2
SLBP	0	0.744274	0.567	0.201	0	F_IPC2
SPC24	0	0.742376	0.525	0.171	0	F_IPC2
MCM7	0	0.739135	0.575	0.189	0	F_IPC2
CDK4	0	0.731791	0.878	0.535	0	F_IPC2
GINS2	0	0.730854	0.5	0.114	0	F_IPC2
MAD2L1	0	0.730755	0.479	0.121	0	F_IPC2
RAD51AP1	0	0.705228	0.456	0.096	0	F_IPC2
HMGB1	0	0.703629	0.993	0.9	0	F_IPC2
NMRAL1	0	0.70161	0.558	0.176	0	F_IPC2
GAPDH	0	0.698616	0.984	0.848	0	F_IPC2
TOP2A	0	0.689864	0.444	0.105	0	F_IPC2
PBK	0	0.678127	0.445	0.115	0	F_IPC2
NEUROD4	0	0.667283	0.353	0.057	0	F_IPC2
RRM1	0	0.665849	0.495	0.164	0	F_IPC2
ASF1B	0	0.653464	0.392	0.071	0	F_IPC2
DSN1	0	0.651272	0.416	0.093	0	F_IPC2
TIFA	0	0.646703	0.581	0.215	0	F_IPC2
SPC25	0	0.64582	0.345	0.08	0	F_IPC2
MCM3	0	0.635316	0.396	0.082	0	F_IPC2
MCM5	0	0.633435	0.411	0.095	0	F_IPC2
CKS2.BLAST.MPF26.793	0	0.630164	0.717	0.307	0	F_IPC2
BARD1	0	0.623	0.395	0.076	0	F_IPC2
H2AFV.BLAST.MPF26.10606	0	0.610485	0.973	0.766	0	F_IPC2
RAN	0	0.609038	0.943	0.696	0	F_IPC2
FEN1	0	0.60518	0.464	0.136	0	F_IPC2
ZNF367	0	0.593471	0.277	0.048	0	F_IPC2
HMGN1	0	0.587679	0.981	0.814	0	F_IPC2
UNG	0	0.567599	0.375	0.093	0	F_IPC2
MFNG	0	0.554455	0.333	0.074	0	F_IPC2
POLQ	0	0.549568	0.309	0.052	0	F_IPC2
CHAF1A	0	0.543987	0.349	0.074	0	F_IPC2
ESCO2	0	0.502723	0.28	0.044	0	F_IPC2
MYBL2	0	0.489801	0.3	0.058	0	F_IPC2
DSCC1	0	0.458636	0.288	0.057	0	F_IPC2
EXO1	0	0.448911	0.274	0.047	0	F_IPC2
PPIA	0	0.441289	0.999	0.991	0	F_IPC2
UBE2C	0	2.45627	0.938	0.159	0	F_IPC3
HMGB2	0	2.09104	0.997	0.444	0	F_IPC3
CCNB1	0	1.98785	0.861	0.108	0	F_IPC3
CENPF	0	1.98126	0.837	0.15	0	F_IPC3
PTTG1	0	1.94893	0.945	0.134	0	F_IPC3
CDCA3	0	1.8978	0.957	0.167	0	F_IPC3
UBE2S	0	1.83091	0.86	0.202	0	F_IPC3
NUSAP1	0	1.67338	0.715	0.1	0	F_IPC3
CDC20	0	1.67261	0.837	0.089	0	F_IPC3
TOP2A	0	1.65359	0.658	0.114	0	F_IPC3
CKS2.BLAST.MPF26.793	0	1.62749	0.91	0.32	0	F_IPC3
CENPE	0	1.5913	0.807	0.084	0	F_IPC3
CCNB2	0	1.56862	0.767	0.083	0	F_IPC3
CCNA2	0	1.41252	0.725	0.123	0	F_IPC3
TPX2	0	1.39905	0.79	0.117	0	F_IPC3
EOMES	0	1.3899	0.784	0.138	0	F_IPC3
ASPM	0	1.36603	0.756	0.128	0	F_IPC3
SPC24	0	1.35597	0.831	0.179	0	F_IPC3
AURKB	0	1.34031	0.709	0.117	0	F_IPC3
PRC1	0	1.31286	0.734	0.088	0	F_IPC3
KNSTRN	0	1.31128	0.737	0.091	0	F_IPC3
ASCL1.BLAST.MPF26.27130	0	1.26904	0.808	0.221	0	F_IPC3
KIF22	0	1.26352	0.807	0.161	0	F_IPC3
PBK	0	1.25781	0.731	0.122	0	F_IPC3
CKAP2	0	1.21561	0.676	0.127	0	F_IPC3
CENPA	0	1.19963	0.72	0.126	0	F_IPC3
H2AFV.BLAST.MPF26.10606	0	1.16858	0.994	0.775	0	F_IPC3
MKI67	0	1.1644	0.688	0.107	0	F_IPC3
CDK1	0	1.15309	0.621	0.101	0	F_IPC3
SGOL2	0	1.13279	0.613	0.083	0	F_IPC3
SGOL1	0	1.12496	0.606	0.088	0	F_IPC3
UBE2T	0	1.11158	0.635	0.118	0	F_IPC3
DLGAP5	0	1.09471	0.623	0.062	0	F_IPC3
GTSE1	0	1.09144	0.651	0.11	0	F_IPC3
CDKN2C	0	1.08868	0.651	0.145	0	F_IPC3
NUF2	0	1.08839	0.658	0.097	0	F_IPC3
FAM64A	0	1.05508	0.647	0.093	0	F_IPC3
TROAP	0	1.04916	0.548	0.041	0	F_IPC3
SPC25	0	1.04637	0.516	0.088	0	F_IPC3
DEPDC1B	0	1.01236	0.612	0.076	0	F_IPC3
NDE1	0	1.00684	0.694	0.141	0	F_IPC3
KPNA2	0	0.995543	0.511	0.067	0	F_IPC3
ARHGAP11A	0	0.98043	0.546	0.053	0	F_IPC3
TOP2A.2nd-hit	0	0.959299	0.49	0.054	0	F_IPC3
MAD2L1	0	0.95376	0.635	0.132	0	F_IPC3
NDC80	0	0.948333	0.572	0.076	0	F_IPC3
CDKN3	0	0.946046	0.533	0.05	0	F_IPC3
PLK1	0	0.943003	0.525	0.071	0	F_IPC3
TACC3	0	0.93269	0.591	0.08	0	F_IPC3
KIF20B	0	0.915082	0.607	0.109	0	F_IPC3
NEUROD4	0	0.905441	0.521	0.066	0	F_IPC3
KIF11	0	0.90338	0.556	0.082	0	F_IPC3
HMMR	0	0.894897	0.519	0.049	0	F_IPC3
KIF23.BLAST.MPF26.24921	0	0.892522	0.539	0.072	0	F_IPC3
PTTG1.BLAST.MPF26.25670	0	0.857107	0.499	0.037	0	F_IPC3
MIS18BP1	0	0.857001	0.486	0.064	0	F_IPC3
NCAPG	0	0.856082	0.543	0.087	0	F_IPC3
RACGAP1	0	0.85114	0.6	0.118	0	F_IPC3
BIRC5	0	0.847968	0.549	0.064	0	F_IPC3
KIF15	0	0.825501	0.516	0.078	0	F_IPC3
INCENP	0	0.807586	0.502	0.074	0	F_IPC3
PSRC1	0	0.795911	0.504	0.066	0	F_IPC3
ECT2	0	0.793917	0.458	0.048	0	F_IPC3
PRR11	0	0.783757	0.499	0.059	0	F_IPC3
NEK2	0	0.773688	0.461	0.049	0	F_IPC3
MXD3	0	0.767232	0.414	0.052	0	F_IPC3
DEPDC1	0	0.765196	0.466	0.046	0	F_IPC3
CEP55	0	0.744551	0.428	0.033	0	F_IPC3
BUB1B	0	0.728449	0.46	0.05	0	F_IPC3
KIF20A	0	0.723896	0.425	0.04	0	F_IPC3
AURKA	0	0.715482	0.405	0.04	0	F_IPC3
KIAA1524	0	0.665658	0.452	0.061	0	F_IPC3
CDCA8	0	0.637964	0.408	0.047	0	F_IPC3
UBE2C.BLAST.MPF26.6997	0	0.617134	0.333	0.019	0	F_IPC3
KIF2C	0	0.606313	0.391	0.04	0	F_IPC3
KIF18A	0	0.584227	0.35	0.034	0	F_IPC3
GAS2L3	0	0.581458	0.391	0.046	0	F_IPC3
HJURP	0	0.563718	0.37	0.042	0	F_IPC3
FAM83D	0	0.5522	0.333	0.035	0	F_IPC3
CCNB3	0	0.5431	0.323	0.018	0	F_IPC3
ARHGEF39	0	0.530704	0.371	0.036	0	F_IPC3
STK17B	0	0.460397	0.303	0.029	0	F_IPC3
TTR	0	4.09812	0.549	0.016	0	F_Ependymal
MPF26.13397.gene	0	3.85858	1	0.15	0	F_Ependymal
MPF26.13406.gene	0	3.2481	0.997	0.239	0	F_Ependymal
FAM216B	0	3.19595	0.995	0.009	0	F_Ependymal
CRIP1.2nd-hit	0	2.85758	0.927	0.019	0	F_Ependymal
FAM183A	0	2.72223	0.99	0.006	0	F_Ependymal
MPF26.25429.gene	0	2.65534	0.964	0.008	0	F_Ependymal
TPPP3	0	2.6067	0.959	0.037	0	F_Ependymal
CAPS	0	2.54721	0.933	0.031	0	F_Ependymal
FAM240C.BLAST.MPF26.29473	0	2.5295	0.896	0.008	0	F_Ependymal
CFAP126	0	2.42869	0.938	0.004	0	F_Ependymal
EFCAB10.BLAST.MPF26.8256	0	2.3761	0.961	0.064	0	F_Ependymal
ODF3B	0	2.34993	0.917	0.004	0	F_Ependymal
DYNLRB2	0	2.3402	0.922	0.042	0	F_Ependymal
PPP1R32	0	2.33466	0.94	0.005	0	F_Ependymal
S100B	0	2.30007	0.912	0.039	0	F_Ependymal
WDR38	0	2.27343	0.915	0.002	0	F_Ependymal
RSPH1	0	2.27207	0.953	0.005	0	F_Ependymal
LIAT1.BLAST.MPF26.26896	0	2.25569	0.959	0.007	0	F_Ependymal
PDE6H	0	2.19888	0.925	0.003	0	F_Ependymal
CCDC74B	0	2.19361	0.922	0.007	0	F_Ependymal
TMEM89	0	2.15447	0.899	0.005	0	F_Ependymal
FAM166B	0	2.14946	0.896	0.005	0	F_Ependymal
CLU	0	2.13365	0.984	0.116	0	F_Ependymal
MAD2L1BP	0	2.09131	0.909	0.046	0	F_Ependymal
FZR1	0	2.06393	0.953	0.15	0	F_Ependymal
FAM166C.BLAST.MPF26.26672	0	2.06354	0.728	0.001	0	F_Ependymal
FOXJ1	0	1.98561	0.912	0.01	0	F_Ependymal
DYDC2	0	1.97878	0.917	0.019	0	F_Ependymal
RAMP1	0	1.97642	0.917	0.068	0	F_Ependymal
CLEC3B	0	1.95799	0.72	0.006	0	F_Ependymal
MORN5	0	1.92656	0.886	0.003	0	F_Ependymal
ERICH2	0	1.90447	0.878	0.004	0	F_Ependymal
C22ORF23.BLAST.MPF26.3315	0	1.89782	0.899	0.023	0	F_Ependymal
ROPN1L	0	1.84454	0.811	0.019	0	F_Ependymal
SCGB2A2.BLAST.MPF26.12041	0	1.8169	0.764	0.001	0	F_Ependymal
RGS22	0	1.76923	0.868	0.013	0	F_Ependymal
DPCD	0	1.74061	0.946	0.263	0	F_Ependymal
MLF1	0	1.71473	0.85	0.025	0	F_Ependymal
SPATA18	0	1.69641	0.85	0.003	0	F_Ependymal
ENKUR	0	1.69567	0.837	0.017	0	F_Ependymal
SPA17	0	1.63373	0.736	0.003	0	F_Ependymal
FAM229B	0	1.60177	0.801	0.067	0	F_Ependymal
SPINK2	0	1.59556	0.785	0.133	0	F_Ependymal
LRRIQ1	0	1.57899	0.845	0.039	0	F_Ependymal
NUDT14.2nd-hit	0	1.53129	0.894	0.166	0	F_Ependymal
TMEM47	0	1.51647	0.85	0.087	0	F_Ependymal
MAPK15	0	1.5135	0.772	0.006	0	F_Ependymal
PKIG	0	1.49045	0.842	0.082	0	F_Ependymal
AQP4	0	1.48637	0.855	0.079	0	F_Ependymal
SPACA9.BLAST.MPF26.23528	0	1.48632	0.798	0.062	0	F_Ependymal
MPF26.25345.gene	0	1.48062	0.847	0.099	0	F_Ependymal
CCDC176	0	1.47866	0.829	0.082	0	F_Ependymal
MPF26.4573.gene	0	1.4758	0.86	0.178	0	F_Ependymal
MPF26.13394.gene	0	1.45867	0.749	0.051	0	F_Ependymal
CFAP299.BLAST.MPF26.41	0	1.42159	0.731	0.01	0	F_Ependymal
LRTOMT	0	1.41791	0.744	0.038	0	F_Ependymal
C11ORF16.BLAST.MPF26.21383	0	1.40626	0.699	0.005	0	F_Ependymal
ANKUB1	0	1.39406	0.694	0.001	0	F_Ependymal
AK9	0	1.36027	0.754	0.012	0	F_Ependymal
PLTP	0	1.34596	0.847	0.122	0	F_Ependymal
DAW1	0	1.3457	0.759	0.004	0	F_Ependymal
C2ORF50.BLAST.MPF26.28163	0	1.33751	0.705	0.001	0	F_Ependymal
LRRC46	0	1.33675	0.712	0.007	0	F_Ependymal
CCK	0	1.32623	0.562	0.032	0	F_Ependymal
PPP1R1B	0	1.32029	0.661	0.081	0	F_Ependymal
CAPSL	0	1.31557	0.736	0.01	0	F_Ependymal
C5ORF49.BLAST.MPF26.8839	0	1.30813	0.746	0.024	0	F_Ependymal
CFAP53	0	1.29978	0.728	0.04	0	F_Ependymal
PLEK2	0	1.29836	0.723	0.024	0	F_Ependymal
CFAP161.BLAST.MPF26.9993	0	1.29049	0.661	0.003	0	F_Ependymal
ROPN1	0	1.2798	0.544	0.001	0	F_Ependymal
SPAG6	0	1.27866	0.712	0.001	0	F_Ependymal
ANXA1	0	1.27731	0.744	0.081	0	F_Ependymal
DNAH12	0	1.27201	0.684	0.002	0	F_Ependymal
DNAH7	0	1.26854	0.712	0.008	0	F_Ependymal
PIFO.2nd-hit	0	1.26554	0.653	0.002	0	F_Ependymal
AK7.2nd-hit	0	1.26534	0.692	0.002	0	F_Ependymal
CALML4	0	1.2597	0.679	0.017	0	F_Ependymal
CCDC146	0	1.25665	0.676	0.002	0	F_Ependymal
EFHC1	0	1.2464	0.655	0.019	0	F_Ependymal
FHL1	0	1.24531	0.801	0.133	0	F_Ependymal
WDR63	0	1.23358	0.71	0.006	0	F_Ependymal
GJB6	0	1.23259	0.723	0.035	0	F_Ependymal
RIIAD1	0	1.20843	0.707	0.029	0	F_Ependymal
CFAP206.BLAST.MPF26.23837	0	1.20189	0.697	0.003	0	F_Ependymal
SAXO2	0	1.18431	0.679	0.009	0	F_Ependymal
DNAJB13	0	1.1815	0.681	0.004	0	F_Ependymal
ECM2	0	1.17208	0.65	0.009	0	F_Ependymal
HYDIN	0	1.16549	0.637	0.002	0	F_Ependymal
PCP4L1	0	1.16173	0.619	0.034	0	F_Ependymal
UBXN11	0	1.14943	0.687	0.015	0	F_Ependymal
RIBC1	0	1.14892	0.674	0.037	0	F_Ependymal
ARMC3	0	1.1481	0.648	0.002	0	F_Ependymal
ARVCF	0	1.14303	0.733	0.102	0	F_Ependymal
RTN4IP1	0	1.14254	0.687	0.063	0	F_Ependymal
CASC1	0	1.14158	0.699	0.04	0	F_Ependymal
MACROD2.BLAST.MPF26.16635	0	1.13633	0.541	0.041	0	F_Ependymal
CCDC81	0	1.136	0.614	0.003	0	F_Ependymal
CCDC153	0	1.13462	0.609	0	0	F_Ependymal
MPF26.1697.gene	0	1.13027	0.632	0.031	0	F_Ependymal
MEIG1	0	1.12653	0.539	0.002	0	F_Ependymal
MMP2	0	1.12036	0.617	0.025	0	F_Ependymal
MPF26.8134.gene	0	1.11993	0.598	0.016	0	F_Ependymal
LRRC71	0	1.10622	0.598	0.005	0	F_Ependymal
CETN4.BLAST.MPF26.21219	0	1.10163	0.547	0.012	0	F_Ependymal
SYNE1	0	1.10101	0.648	0.028	0	F_Ependymal
WDR78	0	1.09803	0.632	0.01	0	F_Ependymal
KHDRBS3	0	1.09617	0.764	0.12	0	F_Ependymal
ADGB	0	1.09525	0.624	0.001	0	F_Ependymal
ATXN1	0	1.09463	0.736	0.081	0	F_Ependymal
FBXO15	0	1.09125	0.692	0.052	0	F_Ependymal
NWD1	0	1.08489	0.591	0.012	0	F_Ependymal
DTHD1	0	1.07287	0.516	0.005	0	F_Ependymal
DCDC2	0	1.06253	0.635	0.003	0	F_Ependymal
GFAP	0	1.06179	0.557	0.032	0	F_Ependymal
CP	0	1.05691	0.63	0.005	0	F_Ependymal
PIH1D3	0	1.04592	0.598	0.002	0	F_Ependymal
MYCBP	0	1.0451	0.681	0.104	0	F_Ependymal
DNAH9	0	1.04443	0.57	0.006	0	F_Ependymal
AVPI1	0	1.0425	0.619	0.062	0	F_Ependymal
ARHGEF33	0	1.03695	0.655	0.062	0	F_Ependymal
NBL1.BLAST.MPF26.24211	0	1.03476	0.655	0.045	0	F_Ependymal
MPF26.26267.gene	0	1.03411	0.358	0.001	0	F_Ependymal
SERPINB6	0	1.03231	0.624	0.071	0	F_Ependymal
KIAA1161	0	1.0276	0.412	0.008	0	F_Ependymal
EFCAB11	0	1.02613	0.513	0.027	0	F_Ependymal
FAM81B	0	1.02383	0.58	0.001	0	F_Ependymal
CFAP97D2.BLAST.MPF26.17484	0	1.02358	0.598	0.003	0	F_Ependymal
ATRIP	0	1.02285	0.606	0.059	0	F_Ependymal
CEP126	0	1.01843	0.705	0.079	0	F_Ependymal
MPF26.7888.gene	0	1.01354	0.591	0.022	0	F_Ependymal
FBXO36	0	1.01146	0.593	0.014	0	F_Ependymal
NEBL	0	1.00622	0.64	0.047	0	F_Ependymal
PLP1	0	0.997535	0.692	0.068	0	F_Ependymal
EFCAB1	0	0.993052	0.521	0.004	0	F_Ependymal
MPF26.12871.gene	0	0.992837	0.552	0.001	0	F_Ependymal
FXYD1	0	0.990823	0.544	0.022	0	F_Ependymal
LRRC23	0	0.987312	0.583	0.002	0	F_Ependymal
MPF26.24431.gene	0	0.986875	0.523	0	0	F_Ependymal
SPEF1	0	0.983092	0.578	0.005	0	F_Ependymal
RAD54B	0	0.977706	0.497	0.017	0	F_Ependymal
ANXA2	0	0.976438	0.557	0.063	0	F_Ependymal
SLC25A12	0	0.971399	0.679	0.08	0	F_Ependymal
CFAP44	0	0.969483	0.557	0.004	0	F_Ependymal
SCN7A	0	0.959322	0.461	0.001	0	F_Ependymal
TEKT1	0	0.956886	0.505	0.003	0	F_Ependymal
ZCCHC12	0	0.956462	0.606	0.057	0	F_Ependymal
DNAJA4	0	0.953758	0.598	0.043	0	F_Ependymal
NME9	0	0.952916	0.528	0.001	0	F_Ependymal
CFAP45	0	0.951463	0.554	0.002	0	F_Ependymal
LRRC6	0	0.945929	0.562	0.013	0	F_Ependymal
PYY	0	0.937115	0.376	0.006	0	F_Ependymal
CFAP77.BLAST.MPF26.23511	0	0.931033	0.516	0	0	F_Ependymal
C6ORF118.BLAST.MPF26.16158	0	0.930378	0.516	0.001	0	F_Ependymal
CRIP1	0	0.915797	0.43	0.003	0	F_Ependymal
MPF26.20255.gene	0	0.912666	0.49	0.013	0	F_Ependymal
WLS	0	0.904748	0.472	0.04	0	F_Ependymal
LRRC56	0	0.904232	0.58	0.056	0	F_Ependymal
PIH1D2	0	0.902951	0.541	0.02	0	F_Ependymal
UBXN10	0	0.902025	0.541	0.001	0	F_Ependymal
DNAAF1	0	0.8898	0.51	0.001	0	F_Ependymal
SPATA17	0	0.885207	0.534	0.009	0	F_Ependymal
CCDC24	0	0.884519	0.554	0.028	0	F_Ependymal
WFDC3	0	0.88279	0.534	0.013	0	F_Ependymal
DNAH6	0	0.86482	0.5	0.012	0	F_Ependymal
TTC34	0	0.859591	0.482	0.008	0	F_Ependymal
FSIP2.BLAST.MPF26.7967	0	0.858031	0.521	0.021	0	F_Ependymal
FANK1	0	0.856511	0.497	0.004	0	F_Ependymal
SHANK2	0	0.851111	0.614	0.078	0	F_Ependymal
GSG1	0	0.848089	0.459	0.003	0	F_Ependymal
CCDC65	0	0.832519	0.464	0.008	0	F_Ependymal
ALS2CR12	0	0.8323	0.477	0	0	F_Ependymal
SPATA6	0	0.829666	0.531	0.04	0	F_Ependymal
PCNXL4	0	0.829209	0.56	0.039	0	F_Ependymal
KIAA2012	0	0.826676	0.49	0.01	0	F_Ependymal
CFAP46	0	0.824361	0.482	0.003	0	F_Ependymal
CRYAB	0	0.817023	0.404	0.024	0	F_Ependymal
BGN	0	0.815125	0.534	0.025	0	F_Ependymal
RPGRIP1L	0	0.814287	0.521	0.046	0	F_Ependymal
ENPP5	0	0.806649	0.503	0.052	0	F_Ependymal
NRSN2	0	0.805134	0.51	0.037	0	F_Ependymal
CDKN1A	0	0.800713	0.446	0.014	0	F_Ependymal
PBXIP1	0	0.793485	0.495	0.018	0	F_Ependymal
DNAH10	0	0.790026	0.448	0.001	0	F_Ependymal
TTC21A	0	0.788654	0.422	0.002	0	F_Ependymal
MAB21L4.BLAST.MPF26.22819	0	0.786636	0.435	0.001	0	F_Ependymal
SLC16A12	0	0.781584	0.446	0.004	0	F_Ependymal
ANKAR	0	0.778934	0.383	0.024	0	F_Ependymal
NQO1	0	0.776247	0.44	0.004	0	F_Ependymal
TNFSF9	0	0.768303	0.402	0.007	0	F_Ependymal
ADAM22	0	0.76728	0.541	0.051	0	F_Ependymal
CDKL4	0	0.765791	0.477	0.008	0	F_Ependymal
TSGA10	0	0.764611	0.456	0.017	0	F_Ependymal
RFX2	0	0.764471	0.456	0.016	0	F_Ependymal
LRRC9.BLAST.MPF26.7147	0	0.753826	0.448	0.014	0	F_Ependymal
MPF26.3235.gene	0	0.753171	0.373	0.009	0	F_Ependymal
DNAH5	0	0.752961	0.446	0.009	0	F_Ependymal
DRC1	0	0.750566	0.474	0.004	0	F_Ependymal
LRRC10B	0	0.750272	0.399	0.001	0	F_Ependymal
MORN3	0	0.744403	0.477	0.026	0	F_Ependymal
CAPS2	0	0.743578	0.459	0.009	0	F_Ependymal
CFAP70	0	0.739936	0.433	0.011	0	F_Ependymal
MPF26.13047.gene	0	0.735911	0.427	0.002	0	F_Ependymal
CFAP221	0	0.735489	0.482	0.012	0	F_Ependymal
MPF26.19212.gene	0	0.735151	0.37	0.021	0	F_Ependymal
ANKRD45	0	0.734902	0.474	0.022	0	F_Ependymal
CFAP54	0	0.734064	0.44	0.013	0	F_Ependymal
CCDC39	0	0.733658	0.446	0.007	0	F_Ependymal
CYB5D1.BLAST.MPF26.18831	0	0.731169	0.477	0.022	0	F_Ependymal
MAK	0	0.729551	0.42	0.001	0	F_Ependymal
CFAP52	0	0.727268	0.44	0.004	0	F_Ependymal
SMIM5	0	0.723464	0.407	0.002	0	F_Ependymal
ECT2L	0	0.722257	0.391	0.001	0	F_Ependymal
GAS2L2	0	0.722004	0.427	0.001	0	F_Ependymal
CFAP43	0	0.719749	0.44	0	0	F_Ependymal
MISP3.BLAST.MPF26.9362	0	0.718219	0.391	0.004	0	F_Ependymal
IQCG	0	0.711213	0.409	0.005	0	F_Ependymal
DRC7	0	0.709686	0.415	0	0	F_Ependymal
PPIL6	0	0.708254	0.448	0.007	0	F_Ependymal
B3GNT4	0	0.706055	0.44	0.038	0	F_Ependymal
IQCA1	0	0.706004	0.407	0.001	0	F_Ependymal
PLEKHB1	0	0.705783	0.378	0.006	0	F_Ependymal
AADACL3	0	0.705391	0.412	0	0	F_Ependymal
PTRF	0	0.703496	0.43	0.037	0	F_Ependymal
LKAAEAR1	0	0.702138	0.391	0.017	0	F_Ependymal
FPGT	0	0.701545	0.516	0.056	0	F_Ependymal
ANKRD26.BLAST.MPF26.21941	0	0.699023	0.415	0.007	0	F_Ependymal
DNAH2	0	0.695015	0.378	0.004	0	F_Ependymal
ELMOD2	0	0.692822	0.43	0.037	0	F_Ependymal
WWOX.BLAST.MPF26.13147	0	0.691118	0.368	0.016	0	F_Ependymal
SPAG17	0	0.68926	0.415	0.001	0	F_Ependymal
RASSF9	0	0.685841	0.321	0.013	0	F_Ependymal
PWWP3B.BLAST.MPF26.14761	0	0.684331	0.404	0.001	0	F_Ependymal
RASD1	0	0.683763	0.37	0.015	0	F_Ependymal
SPP2	0	0.680612	0.435	0.037	0	F_Ependymal
HHATL	0	0.676647	0.368	0.003	0	F_Ependymal
EFHC2	0	0.676359	0.396	0.011	0	F_Ependymal
LRRC48	0	0.675714	0.389	0.001	0	F_Ependymal
TSPAN1	0	0.675592	0.303	0.001	0	F_Ependymal
ADAMTS8	0	0.673514	0.381	0.014	0	F_Ependymal
SPEF2	0	0.673116	0.402	0.005	0	F_Ependymal
KIF9	0	0.671719	0.389	0.006	0	F_Ependymal
CLBA1.BLAST.MPF26.2103	0	0.670809	0.409	0.003	0	F_Ependymal
AGR2	0	0.66885	0.329	0	0	F_Ependymal
SPAG1	0	0.663238	0.44	0.026	0	F_Ependymal
C20ORF85.BLAST.MPF26.29073	0	0.66173	0.368	0	0	F_Ependymal
TP73	0	0.658394	0.402	0.014	0	F_Ependymal
PPP1R36	0	0.656136	0.381	0.006	0	F_Ependymal
ANKRD66	0	0.655809	0.378	0	0	F_Ependymal
ZC2HC1C	0	0.65136	0.415	0.006	0	F_Ependymal
FAM149A	0	0.650686	0.425	0.031	0	F_Ependymal
AKAP14	0	0.649406	0.363	0	0	F_Ependymal
DNAH11	0	0.647112	0.402	0.002	0	F_Ependymal
SLIT2	0	0.642668	0.36	0.02	0	F_Ependymal
UBE2U	0	0.642132	0.383	0.004	0	F_Ependymal
CDCP1	0	0.63694	0.324	0.007	0	F_Ependymal
MORN1	0	0.631764	0.383	0.014	0	F_Ependymal
RNF32	0	0.628792	0.407	0.018	0	F_Ependymal
TTLL9	0	0.626189	0.389	0.001	0	F_Ependymal
OGFR	0	0.622792	0.383	0.023	0	F_Ependymal
EML6	0	0.619274	0.383	0.007	0	F_Ependymal
EFHB	0	0.618597	0.381	0.01	0	F_Ependymal
CCDC114	0	0.617055	0.383	0.001	0	F_Ependymal
C21ORF62.BLAST.MPF26.25854	0	0.616428	0.37	0.003	0	F_Ependymal
TTI1	0	0.610194	0.342	0.022	0	F_Ependymal
PITPNM1	0	0.607439	0.425	0.037	0	F_Ependymal
AGBL3	0	0.607405	0.383	0.019	0	F_Ependymal
PRR18.BLAST.MPF26.16142	0	0.606737	0.306	0.003	0	F_Ependymal
RABL2B	0	0.605107	0.365	0.014	0	F_Ependymal
GLIS3	0	0.603017	0.332	0.008	0	F_Ependymal
IFT122	0	0.601062	0.355	0.016	0	F_Ependymal
MPF26.24747.gene	0	0.600228	0.363	0.006	0	F_Ependymal
MPF26.11005.gene	0	0.594739	0.326	0.007	0	F_Ependymal
ZCCHC16.2nd-hit	0	0.589979	0.345	0.003	0	F_Ependymal
LRRC34	0	0.588716	0.376	0.019	0	F_Ependymal
HRCT1	0	0.587904	0.293	0.001	0	F_Ependymal
CCDC151	0	0.586426	0.352	0.008	0	F_Ependymal
LHB	0	0.583878	0.295	0	0	F_Ependymal
TTC25	0	0.579568	0.35	0.004	0	F_Ependymal
TCTEX1D1	0	0.578357	0.347	0.001	0	F_Ependymal
MAL2	0	0.574647	0.313	0.006	0	F_Ependymal
SLC14A1	0	0.573673	0.306	0.008	0	F_Ependymal
KLHDC9	0	0.571648	0.324	0.006	0	F_Ependymal
CCDC67	0	0.570471	0.355	0.025	0	F_Ependymal
GSG1L.2nd-hit	0	0.570434	0.324	0.002	0	F_Ependymal
TEKT2	0	0.567558	0.391	0.023	0	F_Ependymal
HPD.BLAST.MPF26.23125	0	0.56675	0.36	0.005	0	F_Ependymal
SYNM	0	0.566634	0.298	0.008	0	F_Ependymal
KIF19	0	0.565099	0.339	0.006	0	F_Ependymal
C3ORF62.BLAST.MPF26.9126	0	0.561001	0.378	0.013	0	F_Ependymal
MPF26.20965.gene	0	0.560618	0.358	0.025	0	F_Ependymal
CCDC108	0	0.559986	0.324	0	0	F_Ependymal
RHPN1	0	0.559842	0.373	0.023	0	F_Ependymal
WDR66	0	0.557605	0.306	0.005	0	F_Ependymal
NEK10	0	0.557008	0.345	0.008	0	F_Ependymal
ST6GALNAC2	0	0.555324	0.319	0.011	0	F_Ependymal
SLC4A5	0	0.552748	0.293	0.001	0	F_Ependymal
ZBBX	0	0.552248	0.321	0.007	0	F_Ependymal
CFAP61	0	0.551616	0.321	0.007	0	F_Ependymal
MAP3K19	0	0.54964	0.324	0.001	0	F_Ependymal
VWA3A	0	0.54804	0.342	0.001	0	F_Ependymal
CCDC83	0	0.544211	0.324	0	0	F_Ependymal
DLEC1	0	0.543375	0.324	0.002	0	F_Ependymal
ERICH3	0	0.540675	0.316	0.008	0	F_Ependymal
RIBC2	0	0.533511	0.324	0.021	0	F_Ependymal
XRRA1	0	0.530405	0.332	0.008	0	F_Ependymal
TMEM52	0	0.524745	0.365	0.027	0	F_Ependymal
DNAI2	0	0.518571	0.306	0.001	0	F_Ependymal
ENKD1	0	0.51788	0.339	0.016	0	F_Ependymal
MPF26.11670.gene	0	0.517834	0.277	0	0	F_Ependymal
LRMDA.BLAST.MPF26.3004	0	0.517381	0.306	0.017	0	F_Ependymal
LCA5L	0	0.515412	0.298	0.002	0	F_Ependymal
CFAP74	0	0.514745	0.329	0.014	0	F_Ependymal
TMEM156	0	0.513331	0.288	0.011	0	F_Ependymal
RRAD	0	0.510763	0.285	0.007	0	F_Ependymal
TMEM232	0	0.510537	0.282	0.001	0	F_Ependymal
PLSCR4	0	0.50391	0.285	0.014	0	F_Ependymal
NSUN7	0	0.501198	0.313	0.006	0	F_Ependymal
AGBL2.2nd-hit	0	0.501154	0.321	0.005	0	F_Ependymal
SLC24A4	0	0.499847	0.313	0.007	0	F_Ependymal
MPF26.5060.gene	0	0.494699	0.28	0	0	F_Ependymal
MPF26.12233.gene	0	0.494256	0.298	0.017	0	F_Ependymal
ETV2	0	0.493992	0.345	0.02	0	F_Ependymal
DNAH1	0	0.493073	0.267	0	0	F_Ependymal
MPF26.12253.gene	0	0.489602	0.332	0.014	0	F_Ependymal
MPF26.23574.gene	0	0.488764	0.316	0.01	0	F_Ependymal
FGF1	0	0.488754	0.262	0.009	0	F_Ependymal
CCDC175	0	0.488604	0.285	0.012	0	F_Ependymal
TPPP	0	0.48842	0.282	0.01	0	F_Ependymal
ZMYND10	0	0.487947	0.285	0.002	0	F_Ependymal
TEX9	0	0.486468	0.321	0.017	0	F_Ependymal
BAAT	0	0.484493	0.288	0.007	0	F_Ependymal
MDH1B	0	0.483127	0.298	0.002	0	F_Ependymal
ENO4	0	0.481752	0.29	0.003	0	F_Ependymal
C8ORF89.BLAST.MPF26.19435	0	0.481464	0.303	0.001	0	F_Ependymal
RSPH4A	0	0.481363	0.28	0.001	0	F_Ependymal
IQCD	0	0.473836	0.301	0.008	0	F_Ependymal
MPF26.23739.gene	0	0.467523	0.272	0.004	0	F_Ependymal
FHAD1	0	0.467464	0.28	0.002	0	F_Ependymal
MPF26.21311.gene	0	0.466877	0.275	0.012	0	F_Ependymal
STMND1	0	0.463279	0.303	0	0	F_Ependymal
2022-03-10	0	0.461322	0.293	0.004	0	F_Ependymal
TCP11L2	0	0.461142	0.332	0.021	0	F_Ependymal
PPP1R42	0	0.458869	0.285	0.002	0	F_Ependymal
MPF26.17978.gene	0	0.456187	0.285	0.009	0	F_Ependymal
CCNA1	0	0.455403	0.277	0.013	0	F_Ependymal
MPF26.19999.gene	0	0.45482	0.251	0.001	0	F_Ependymal
STPG1	0	0.453874	0.267	0.001	0	F_Ependymal
C16ORF71.BLAST.MPF26.28335	0	0.451809	0.303	0.015	0	F_Ependymal
RAB36	0	0.449689	0.316	0.016	0	F_Ependymal
MOK	0	0.448462	0.295	0.016	0	F_Ependymal
CFAP57	0	0.445066	0.293	0.001	0	F_Ependymal
DNALI1	0	0.440927	0.264	0.001	0	F_Ependymal
WDR93	0	0.44005	0.254	0.003	0	F_Ependymal
TIGD1.BLAST.MPF26.26007	0	0.436112	0.259	0.002	0	F_Ependymal
GLB1L	0	0.433962	0.285	0.015	0	F_Ependymal
MPF26.2347.gene	0	0.432662	0.269	0.012	0	F_Ependymal
SPAG8	0	0.431553	0.282	0.006	0	F_Ependymal
TEKT3	0	0.431128	0.269	0.002	0	F_Ependymal
MPF26.1294.gene	0	0.429336	0.256	0.002	0	F_Ependymal
COLQ	0	0.421531	0.262	0.004	0	F_Ependymal
DNAI1	0	0.414903	0.259	0.004	0	F_Ependymal
S100A10.BLAST.MPF26.3703	0	0.411722	0.262	0.003	0	F_Ependymal
CCDC103	0	0.401195	0.264	0.013	0	F_Ependymal
WDPCP	0	0.400268	0.254	0.011	0	F_Ependymal
OLIG1.BLAST.MPF26.25856	0	1.67684	0.479	0.01	0	F_OPC
SCRG1	0	1.66842	0.604	0.138	0	F_OPC
APOD	0	1.60942	0.402	0.01	0	F_OPC
KCNE5.BLAST.MPF26.5291	0	1.55233	0.298	0.039	0	F_OPC
CD9	0	1.42915	0.272	0.015	0	F_OPC
OLIG2	0	1.28473	0.379	0.01	0	F_OPC
PDGFRA	0	1.26233	0.265	0.007	0	F_OPC
RTP5	0	1.18769	0.326	0.039	0	F_OPC
LHFPL3	0	1.02334	0.285	0.029	0	F_OPC
DBI	0	1.00246	0.963	0.757	0	F_OPC
TAGLN3	0	1.25837	0.974	0.336	0	F_Deep Layer
NRN1	0	1.24404	0.856	0.166	0	F_Deep Layer
DIRAS3	0	1.13051	0.515	0.028	0	F_Deep Layer
ELAVL4	0	1.08813	0.963	0.342	0	F_Deep Layer
NOL4	0	1.06697	0.407	0.063	0	F_Deep Layer
GADD45GIP1	0	1.01803	0.912	0.342	0	F_Deep Layer
CFL2	0	1.01201	0.939	0.39	0	F_Deep Layer
EMX1	0	0.968624	0.834	0.208	0	F_Deep Layer
INA	0	0.962977	0.672	0.129	0	F_Deep Layer
NSG1.BLAST.MPF26.15697	0	0.953636	0.9	0.259	0	F_Deep Layer
GADD45A	0	0.94425	0.651	0.073	0	F_Deep Layer
MPF26.1143.gene	0	0.938268	0.676	0.065	0	F_Deep Layer
LHX9	0	0.928441	0.477	0.007	0	F_Deep Layer
NEUROD1	0	0.88117	0.606	0.1	0	F_Deep Layer
FAM110A	0	0.873375	0.536	0.075	0	F_Deep Layer
IGFBPL1	0	0.87214	0.879	0.205	0	F_Deep Layer
NECAB1	0	0.862818	0.593	0.062	0	F_Deep Layer
TBR1	0	0.828956	0.692	0.138	0	F_Deep Layer
SSTR2	0	0.82198	0.571	0.075	0	F_Deep Layer
TNNT1	0	0.807919	0.336	0.008	0	F_Deep Layer
NEUROG2	0	0.807755	0.61	0.146	0	F_Deep Layer
MPF26.11629.gene	0	0.768309	0.569	0.1	0	F_Deep Layer
DUSP4	0	0.76465	0.703	0.139	0	F_Deep Layer
SLC17A6	0	0.705659	0.614	0.075	0	F_Deep Layer
CHST8	0	0.702003	0.528	0.026	0	F_Deep Layer
AUTS2.BLAST.MPF26.20200	0	0.69679	0.798	0.245	0	F_Deep Layer
ADRA2A	0	0.694236	0.408	0.037	0	F_Deep Layer
NHLH2	0	0.688558	0.421	0.005	0	F_Deep Layer
PPFIA2	0	0.678049	0.576	0.097	0	F_Deep Layer
EPHA7	0	0.669524	0.554	0.082	0	F_Deep Layer
ST18	0	0.663296	0.452	0.008	0	F_Deep Layer
ACTB.2nd-hit	0	0.649816	0.686	0.144	0	F_Deep Layer
CNR1	0	0.64949	0.562	0.081	0	F_Deep Layer
MASP1	0	0.628901	0.451	0.081	0	F_Deep Layer
PCDH9	0	0.622596	0.626	0.132	0	F_Deep Layer
NEFL	0	0.58613	0.389	0.017	0	F_Deep Layer
NXPH4	0	0.584206	0.436	0.045	0	F_Deep Layer
FXYD7	0	0.571285	0.398	0.035	0	F_Deep Layer
BCL11B	0	0.552592	0.432	0.03	0	F_Deep Layer
NEFM	0	0.543539	0.401	0.025	0	F_Deep Layer
KIT	0	0.518587	0.348	0.048	0	F_Deep Layer
CADPS	0	0.478003	0.44	0.046	0	F_Deep Layer
SYNPR	0	0.476332	0.313	0.023	0	F_Deep Layer
DNAJC12	0	0.476129	0.561	0.104	0	F_Deep Layer
FRZB	0	0.471822	0.379	0.022	0	F_Deep Layer
ADCYAP1	0	0.470204	0.304	0.026	0	F_Deep Layer
PAPPA2	0	0.452262	0.311	0.01	0	F_Deep Layer
MYT1	0	0.398701	0.434	0.058	0	F_Deep Layer
EYA2	0	0.390916	0.287	0.003	0	F_Deep Layer
DCC	0	0.387572	0.354	0.033	0	F_Deep Layer
CELF3	0	0.377063	0.543	0.102	0	F_Deep Layer
NPTXR	0	0.356862	0.318	0.026	0	F_Deep Layer
TMEM74B	0	0.291141	0.259	0.017	0	F_Deep Layer
MPF26.926.gene	0	1.87833	0.81	0.107	0	F_Upper Layer3
SYT4	0	1.552	0.729	0.096	0	F_Upper Layer3
ARPP21	0	1.41246	0.708	0.086	0	F_Upper Layer3
STMN2	0	1.39532	0.955	0.45	0	F_Upper Layer3
DYNC1I1	0	1.29934	0.601	0.058	0	F_Upper Layer3
ATP1B1	0	1.26719	0.656	0.138	0	F_Upper Layer3
GRIN2B	0	1.1336	0.67	0.12	0	F_Upper Layer3
SNCB	0	1.02888	0.566	0.055	0	F_Upper Layer3
ELMOD1	0	1.02177	0.563	0.054	0	F_Upper Layer3
STMN3.2nd-hit	0	0.950333	0.721	0.159	0	F_Upper Layer3
CHL1	0	0.947716	0.576	0.101	0	F_Upper Layer3
MPF26.19026.gene	0	0.941559	0.442	0.04	0	F_Upper Layer3
MAPT	0	0.926057	0.664	0.122	0	F_Upper Layer3
CNRIP1	0	0.911391	0.475	0.051	0	F_Upper Layer3
SCG2	0	0.90718	0.333	0.019	0	F_Upper Layer3
CELF4	0	0.905311	0.699	0.155	0	F_Upper Layer3
FXYD7	0	0.888077	0.472	0.036	0	F_Upper Layer3
LMO7	0	0.882413	0.413	0.034	0	F_Upper Layer3
SCN2A	0	0.874642	0.444	0.029	0	F_Upper Layer3
INA	0	0.860721	0.671	0.133	0	F_Upper Layer3
KHDRBS2	0	0.842897	0.354	0.014	0	F_Upper Layer3
OPCML	0	0.839459	0.434	0.023	0	F_Upper Layer3
GUCY1A3	0	0.821743	0.316	0.017	0	F_Upper Layer3
KCNG1	0	0.818965	0.32	0.009	0	F_Upper Layer3
CCK	0	0.816433	0.336	0.032	0	F_Upper Layer3
NEFM	0	0.811838	0.324	0.03	0	F_Upper Layer3
CAMK4	0	0.778386	0.406	0.047	0	F_Upper Layer3
XKR4	0	0.769358	0.424	0.039	0	F_Upper Layer3
PLPPR1.BLAST.MPF26.28045	0	0.759205	0.503	0.073	0	F_Upper Layer3
NEFL	0	0.754851	0.299	0.022	0	F_Upper Layer3
VSNL1	0	0.750643	0.343	0.031	0	F_Upper Layer3
ADCY1	0	0.747576	0.378	0.049	0	F_Upper Layer3
PPP1R1A	0	0.746127	0.448	0.056	0	F_Upper Layer3
GUCY1B3	0	0.736516	0.346	0.03	0	F_Upper Layer3
TMEM150C	0	0.717059	0.437	0.061	0	F_Upper Layer3
FAM49A	0	0.701178	0.438	0.058	0	F_Upper Layer3
LRRC4C	0	0.688635	0.317	0.028	0	F_Upper Layer3
LINGO1	0	0.615418	0.35	0.03	0	F_Upper Layer3
SNAP91	0	0.607939	0.414	0.052	0	F_Upper Layer3
PHF24	0	0.586248	0.308	0.02	0	F_Upper Layer3
CACNA1E	0	0.585675	0.258	0.016	0	F_Upper Layer3
KIFC2.2nd-hit	0	0.526471	0.257	0.022	0	F_Upper Layer3
DLG2	0	0.52394	0.291	0.022	0	F_Upper Layer3
SCN3B	0	0.517084	0.299	0.026	0	F_Upper Layer3
STUM.BLAST.MPF26.9874	0	0.507968	0.256	0.021	0	F_Upper Layer3
PPP1R14C	0	0.473514	0.258	0.014	0	F_Upper Layer3
JAKMIP1.BLAST.MPF26.15718	0	0.469835	0.292	0.023	0	F_Upper Layer3
GPR26	0	0.454631	0.264	0.023	0	F_Upper Layer3
NEUROD6	0	1.25332	0.744	0.222	0	F_Upper Layer1
FBXW7	0	1.20616	0.581	0.319	0	F_Upper Layer1
NEUROD2	0	1.16982	0.711	0.237	0	F_Upper Layer1
EPHA3	0	1.03539	0.371	0.151	0	F_Upper Layer1
SEMA3C	0	1.00591	0.326	0.071	0	F_Upper Layer1
PPP2R2B	0	0.985653	0.474	0.204	0	F_Upper Layer1
TUBB5.BLAST.MPF26.20811	0	0.978237	0.592	0.366	0	F_Upper Layer1
NSG2.BLAST.MPF26.4839	0	0.966046	0.728	0.303	0	F_Upper Layer1
GABPB2	0	0.881253	0.914	0.541	0	F_Upper Layer1
DDAH2	0	0.837688	0.798	0.6	0	F_Upper Layer1
SATB2	0	0.793126	0.344	0.118	0	F_Upper Layer1
TUBB4B.2nd-hit	0	0.77165	0.917	0.605	0	F_Upper Layer1
RTN1	0	0.733653	0.818	0.544	0	F_Upper Layer1
STMN1	0	0.71386	0.998	0.929	0	F_Upper Layer1
GPM6A	0	0.666013	0.74	0.601	0	F_Upper Layer1
STMN2	0	0.641632	0.808	0.403	0	F_Upper Layer1
CD24	0	0.583175	0.788	0.71	0	F_Upper Layer1
HN1	0	0.532252	0.831	0.759	0	F_Upper Layer1
TMSB10	0	0.504202	1	0.981	0	F_Upper Layer1
H3F3B	0	0.408563	0.964	0.977	0	F_Upper Layer1
MARCKSL1	0	0.408147	0.95	0.866	0	F_Upper Layer1
RPL23A	0	0.385131	0.989	0.986	0	F_Upper Layer1
SATB2	0	1.75246	0.88	0.109	0	F_Upper Layer2
MEF2C	0	1.63176	0.809	0.298	0	F_Upper Layer2
NEUROD6	0	1.62515	0.966	0.259	0	F_Upper Layer2
FAM19A1	0	1.40678	0.738	0.104	0	F_Upper Layer2
SYT4	0	1.32603	0.572	0.084	0	F_Upper Layer2
ADGRL3	0	1.27037	0.739	0.205	0	F_Upper Layer2
NEUROD2	0	1.2533	0.944	0.269	0	F_Upper Layer2
FGF12	0	1.22384	0.635	0.098	0	F_Upper Layer2
YWHAH	0	1.20772	0.927	0.568	0	F_Upper Layer2
BHLHE22	0	1.18477	0.53	0.066	0	F_Upper Layer2
CALM1	0	1.15956	0.995	0.887	0	F_Upper Layer2
RBFOX1	0	1.11457	0.711	0.151	0	F_Upper Layer2
NSG2.BLAST.MPF26.4839	0	1.10895	0.936	0.331	0	F_Upper Layer2
HS6ST2	0	1.0947	0.596	0.145	0	F_Upper Layer2
ARPP21	0	1.08544	0.519	0.077	0	F_Upper Layer2
RUNX1T1	0	1.08061	0.599	0.14	0	F_Upper Layer2
PLK2	0	1.05958	0.569	0.106	0	F_Upper Layer2
THSD7A	0	1.03256	0.525	0.095	0	F_Upper Layer2
MPF26.13586.gene	0	1.0237	0.485	0.052	0	F_Upper Layer2
STMN2	0	1.00344	0.974	0.432	0	F_Upper Layer2
GAP43	0	0.998675	0.913	0.499	0	F_Upper Layer2
SHTN1	0	0.993021	0.664	0.156	0	F_Upper Layer2
CELF2	0	0.948378	0.943	0.726	0	F_Upper Layer2
GRIN2B	0	0.941937	0.594	0.106	0	F_Upper Layer2
ID2	0	0.941885	0.658	0.268	0	F_Upper Layer2
GABPB2	0	0.938638	0.983	0.573	0	F_Upper Layer2
CD24	0	0.880734	0.974	0.707	0	F_Upper Layer2
STMN4	0	0.870901	0.74	0.322	0	F_Upper Layer2
RTN1	0	0.867273	0.977	0.561	0	F_Upper Layer2
DAB1	0	0.865272	0.481	0.132	0	F_Upper Layer2
TUBB4B.2nd-hit	0	0.850908	0.985	0.631	0	F_Upper Layer2
BCL11A	0	0.846318	0.746	0.345	0	F_Upper Layer2
RAC3	0	0.828419	0.665	0.262	0	F_Upper Layer2
MPPED1	0	0.818283	0.449	0.111	0	F_Upper Layer2
MPF26.10764.gene	0	0.815091	0.655	0.202	0	F_Upper Layer2
SOBP	0	0.804758	0.433	0.083	0	F_Upper Layer2
TUBB4A	0	0.800867	0.619	0.234	0	F_Upper Layer2
MPF26.19026.gene	0	0.7739	0.343	0.033	0	F_Upper Layer2
ACOT7	0	0.766277	0.469	0.121	0	F_Upper Layer2
NSG1.BLAST.MPF26.15697	0	0.754373	0.672	0.257	0	F_Upper Layer2
FLRT2	0	0.74869	0.364	0.077	0	F_Upper Layer2
CRABP1	0	0.745499	0.319	0.061	0	F_Upper Layer2
CHL1	0	0.694702	0.41	0.095	0	F_Upper Layer2
STMN1	0	0.682146	1	0.936	0	F_Upper Layer2
TMSB10	0	0.625965	1	0.983	0	F_Upper Layer2
TMSB4X	0	0.588902	0.999	0.995	0	F_Upper Layer2
CSRP2	0	1.98198	0.887	0.333	0	F_Upper Layer4
NEUROD2	0	1.41914	0.997	0.29	0	F_Upper Layer4
NEUROD6	0	1.27349	0.992	0.282	0	F_Upper Layer4
MPF26.2418.gene	0	1.17943	1	0.932	0	F_Upper Layer4
PPP2R2B	0	1.1579	0.921	0.228	0	F_Upper Layer4
NSG2.BLAST.MPF26.4839	0	1.15627	0.992	0.351	0	F_Upper Layer4
SYT4	0	0.929759	0.594	0.1	0	F_Upper Layer4
SCG3	0	0.892125	0.723	0.142	0	F_Upper Layer4
ACKR3	0	0.887673	0.497	0.046	0	F_Upper Layer4
MPF26.13237.gene	0	0.826609	0.564	0.074	0	F_Upper Layer4
ACTL6B	0	0.802795	0.759	0.16	0	F_Upper Layer4
SSTR2	0	0.799085	0.524	0.082	0	F_Upper Layer4
GPC2	0	0.792943	0.623	0.105	0	F_Upper Layer4
UNC5D	0	0.64443	0.549	0.081	0	F_Upper Layer4
MPF26.13475.gene	0	3.0959	0.887	0.019	0	F_ITN
DLX1	0	2.49575	0.749	0.022	0	F_ITN
DLX2	0	2.1236	0.675	0.016	0	F_ITN
CXCR4	0	1.77727	0.507	0.065	0	F_ITN
ARL4D	0	1.57783	0.486	0.051	0	F_ITN
NXPH1	0	1.45043	0.309	0.007	0	F_ITN
GAD1	0	1.41717	0.395	0.006	0	F_ITN
RUNX1T1	0	1.29719	0.469	0.138	0	F_ITN
INA	0	1.21006	0.456	0.119	0	F_ITN
DLX5	0	1.19602	0.313	0.008	0	F_ITN
SYT1	0	1.18471	0.427	0.126	0	F_ITN
MPF26.24961.gene	0	1.16544	0.586	0.29	0	F_ITN
MPF26.16504.gene	0	1.14696	0.287	0.004	0	F_ITN
ERBB4	0	1.09293	0.28	0.006	0	F_ITN
NREP	0	1.08561	0.795	0.635	0	F_ITN
MPF26.926.gene	0	1.03058	0.37	0.102	0	F_ITN
MPF26.10764.gene	0	1.02841	0.492	0.203	0	F_ITN
GRIA1	0	0.932443	0.269	0.051	0	F_ITN
RTN1	0	0.874128	0.875	0.558	0	F_ITN
STMN2	0	0.872912	0.849	0.428	0	F_ITN
GABPB2	0	0.802816	0.912	0.567	0	F_ITN
TMSB10	0	0.800431	1	0.982	0	F_ITN
TCF4	0	0.747198	0.93	0.848	0	F_ITN
CALM2	0	0.621033	0.93	0.867	0	F_ITN
STMN1	0	0.581813	0.996	0.934	0	F_ITN
H3F3B	0	0.526096	0.986	0.974	0	F_ITN
CST3.BLAST.MPF26.16562	0	3.40037	0.996	0.569	0	F_Microglia1
APOE	0	3.12649	0.909	0.182	0	F_Microglia1
C1QA	0	2.97947	0.972	0.048	0	F_Microglia1
C1QC	0	2.92834	0.973	0.045	0	F_Microglia1
C3	0	2.84187	0.924	0.039	0	F_Microglia1
TYROBP	0	2.74836	0.968	0.06	0	F_Microglia1
P2RY12	0	2.71743	0.923	0.034	0	F_Microglia1
FCER1G	0	2.50065	0.951	0.048	0	F_Microglia1
TREM2.2nd-hit	0	2.46889	0.904	0.038	0	F_Microglia1
RGS10	0	2.37042	0.927	0.086	0	F_Microglia1
NPC2	0	2.28325	0.964	0.374	0	F_Microglia1
APOC1	0	2.25535	0.783	0.075	0	F_Microglia1
GPR34	0	2.22932	0.878	0.037	0	F_Microglia1
RNASET2	0	2.18931	0.914	0.159	0	F_Microglia1
AIF1	0	2.18705	0.871	0.041	0	F_Microglia1
CYBA.BLAST.MPF26.17034	0	2.16972	0.941	0.277	0	F_Microglia1
VSIG4	0	2.16798	0.866	0.038	0	F_Microglia1
CD14	0	2.13737	0.836	0.041	0	F_Microglia1
SAT1	0	2.07524	0.968	0.392	0	F_Microglia1
GYPC	0	2.03593	0.839	0.079	0	F_Microglia1
CTSS	0	1.97466	0.824	0.039	0	F_Microglia1
CSF1R	0	1.94515	0.784	0.031	0	F_Microglia1
B2M	0	1.92322	0.949	0.341	0	F_Microglia1
IFI30	0	1.8901	0.809	0.045	0	F_Microglia1
LGALS3	0	1.87853	0.719	0.033	0	F_Microglia1
CLEC7A	0	1.87722	0.79	0.033	0	F_Microglia1
CTSZ	0	1.80885	0.723	0.048	0	F_Microglia1
PSAP	0	1.79434	0.938	0.461	0	F_Microglia1
LY86	0	1.79366	0.763	0.035	0	F_Microglia1
IL7R	0	1.78105	0.649	0.019	0	F_Microglia1
LTC4S	0	1.73167	0.721	0.061	0	F_Microglia1
PILRA	0	1.68426	0.695	0.03	0	F_Microglia1
MPF26.4961.gene	0	1.66523	0.674	0.035	0	F_Microglia1
FCGR1A.BLAST.MPF26.14359	0	1.63368	0.672	0.032	0	F_Microglia1
PNLIP	0	1.62772	0.667	0.034	0	F_Microglia1
RETN	0	1.61744	0.606	0.026	0	F_Microglia1
IL18	0	1.58741	0.674	0.033	0	F_Microglia1
FCGRT	0	1.56858	0.74	0.084	0	F_Microglia1
VAMP8	0	1.5611	0.792	0.114	0	F_Microglia1
CEP164	0	1.55023	0.738	0.14	0	F_Microglia1
CCL8	0	1.54955	0.353	0.019	0	F_Microglia1
ALOX5AP	0	1.53659	0.683	0.05	0	F_Microglia1
MPF26.13151.gene	0	1.51832	0.729	0.074	0	F_Microglia1
MPF26.25284.gene	0	1.49138	0.618	0.031	0	F_Microglia1
CX3CR1	0	1.482	0.569	0.016	0	F_Microglia1
MPF26.13494.gene	0	1.43381	0.531	0.037	0	F_Microglia1
CD53	0	1.43343	0.592	0.027	0	F_Microglia1
CTSC	0	1.43026	0.633	0.039	0	F_Microglia1
CPVL	0	1.41747	0.577	0.027	0	F_Microglia1
GAL3ST4	0	1.40713	0.616	0.068	0	F_Microglia1
HLA-DMB.BLAST.MPF26.20445	0	1.39898	0.567	0.027	0	F_Microglia1
CD81	0	1.3984	0.736	0.197	0	F_Microglia1
MAN2B1	0	1.3811	0.637	0.075	0	F_Microglia1
LST1	0	1.37845	0.557	0.03	0	F_Microglia1
SFT2D1	0	1.36227	0.732	0.21	0	F_Microglia1
CSTB.BLAST.MPF26.25737	0	1.36066	0.852	0.477	0	F_Microglia1
LILRA6.BLAST.MPF26.26582	0	1.3522	0.569	0.025	0	F_Microglia1
GMFG	0	1.33458	0.625	0.095	0	F_Microglia1
BIN1	0	1.31834	0.599	0.109	0	F_Microglia1
HSPB1	0	1.30813	0.641	0.116	0	F_Microglia1
EGFL7	0	1.29443	0.699	0.14	0	F_Microglia1
SEPP1	0	1.28408	0.581	0.057	0	F_Microglia1
SPP1	0	1.28009	0.59	0.058	0	F_Microglia1
LAPTM5	0	1.27975	0.548	0.024	0	F_Microglia1
ARHGDIB	0	1.27898	0.601	0.065	0	F_Microglia1
CCL14	0	1.27622	0.459	0.038	0	F_Microglia1
GPX1	0	1.27298	0.904	0.536	0	F_Microglia1
ADGRF5	0	1.26855	0.591	0.051	0	F_Microglia1
CTSD	0	1.26463	0.707	0.275	0	F_Microglia1
CD37	0	1.25835	0.519	0.023	0	F_Microglia1
SERPINF1	0	1.25774	0.517	0.031	0	F_Microglia1
GPR157	0	1.24201	0.581	0.119	0	F_Microglia1
ASAH1	0	1.21844	0.587	0.101	0	F_Microglia1
ITM2B	0	1.21649	0.95	0.729	0	F_Microglia1
SAMSN1	0	1.20349	0.485	0.022	0	F_Microglia1
SPI1	0	1.20127	0.509	0.025	0	F_Microglia1
IGSF6	0	1.19664	0.472	0.028	0	F_Microglia1
RAPGEF6	0	1.19253	0.546	0.093	0	F_Microglia1
FXYD5	0	1.18501	0.55	0.051	0	F_Microglia1
LAMP1	0	1.16204	0.717	0.266	0	F_Microglia1
MPF26.6886.gene	0	1.14966	0.473	0.026	0	F_Microglia1
DRAM2	0	1.14132	0.708	0.27	0	F_Microglia1
GRN	0	1.14031	0.593	0.159	0	F_Microglia1
MT-CO1.BLAST.MPF26.3629	0	1.14019	0.997	0.995	0	F_Microglia1
FTL	0	1.13559	0.997	0.983	0	F_Microglia1
HMOX1	0	1.13031	0.472	0.037	0	F_Microglia1
C1ORF162.BLAST.MPF26.16428	0	1.12298	0.438	0.022	0	F_Microglia1
CD59	0	1.11656	0.724	0.298	0	F_Microglia1
HTRA1	0	1.11075	0.65	0.137	0	F_Microglia1
SLC9A8	0	1.11011	0.471	0.046	0	F_Microglia1
ARPC1B	0	1.10715	0.49	0.043	0	F_Microglia1
IFNGR1	0	1.102	0.461	0.042	0	F_Microglia1
KIAA0319	0	1.09818	0.461	0.053	0	F_Microglia1
WASF2	0	1.0706	0.616	0.19	0	F_Microglia1
MPF26.9486.gene	0	1.07014	0.397	0.019	0	F_Microglia1
ANKRD37	0	1.06257	0.505	0.132	0	F_Microglia1
SELPLG	0	1.06133	0.413	0.015	0	F_Microglia1
RAP1A	0	1.05402	0.75	0.392	0	F_Microglia1
PPT1	0	1.05166	0.51	0.103	0	F_Microglia1
ABCA1	0	1.05103	0.405	0.09	0	F_Microglia1
MPF26.21825.gene	0	1.04694	0.434	0.024	0	F_Microglia1
CTSH	0	1.03997	0.472	0.09	0	F_Microglia1
OGFRL1	0	1.0356	0.498	0.086	0	F_Microglia1
SLC31A2	0	1.01284	0.404	0.027	0	F_Microglia1
UCP2	0	1.01282	0.543	0.161	0	F_Microglia1
SIRPA	0	1.01026	0.505	0.105	0	F_Microglia1
ATP6V0E1	0	1.00253	0.674	0.266	0	F_Microglia1
MNDA	0	1.00241	0.443	0.036	0	F_Microglia1
FOLR2	0	0.982644	0.405	0.025	0	F_Microglia1
PLD3	0	0.977781	0.648	0.268	0	F_Microglia1
MPF26.27544.gene	0	0.977668	0.662	0.214	0	F_Microglia1
RPS29	0	0.975973	0.994	0.985	0	F_Microglia1
CASP1.BLAST.MPF26.12818	0	0.956354	0.384	0.022	0	F_Microglia1
TPT1	0	0.949894	0.952	0.846	0	F_Microglia1
PTPN18	0	0.949835	0.387	0.023	0	F_Microglia1
COTL1	0	0.946122	0.514	0.15	0	F_Microglia1
MPF26.2594.gene	0	0.945438	0.363	0.015	0	F_Microglia1
CMTM7	0	0.945265	0.382	0.032	0	F_Microglia1
BLVRB	0	0.937115	0.517	0.143	0	F_Microglia1
SCPEP1	0	0.911536	0.425	0.074	0	F_Microglia1
ABHD12	0	0.906767	0.454	0.101	0	F_Microglia1
ABI3	0	0.901206	0.351	0.017	0	F_Microglia1
SLC4A7	0	0.894095	0.439	0.112	0	F_Microglia1
CLEC2D	0	0.890302	0.346	0.017	0	F_Microglia1
CFP	0	0.889407	0.318	0.013	0	F_Microglia1
ARPC2	0	0.888761	0.867	0.636	0	F_Microglia1
SLC7A7	0	0.887139	0.359	0.026	0	F_Microglia1
LYN	0	0.88443	0.417	0.062	0	F_Microglia1
MPEG1	0	0.881506	0.332	0.016	0	F_Microglia1
HNMT	0	0.874152	0.378	0.034	0	F_Microglia1
UNC93B1	0	0.872334	0.343	0.02	0	F_Microglia1
MPF26.6882.gene	0	0.870711	0.36	0.036	0	F_Microglia1
IGF1.2nd-hit	0	0.869823	0.365	0.037	0	F_Microglia1
WDR49	0	0.867739	0.352	0.028	0	F_Microglia1
DAB2.2nd-hit	0	0.866806	0.367	0.054	0	F_Microglia1
RENBP	0	0.865708	0.345	0.03	0	F_Microglia1
FCRLA	0	0.865487	0.303	0.02	0	F_Microglia1
RPS12.BLAST.MPF26.25090	0	0.864674	0.935	0.83	0	F_Microglia1
CD7	0	0.861669	0.316	0.014	0	F_Microglia1
KCTD12	0	0.851578	0.382	0.052	0	F_Microglia1
OSTF1	0	0.846389	0.438	0.113	0	F_Microglia1
VSIR.BLAST.MPF26.21001	0	0.84466	0.334	0.027	0	F_Microglia1
QPCT	0	0.844613	0.36	0.032	0	F_Microglia1
EPB41L2	0	0.838149	0.38	0.066	0	F_Microglia1
SMAP2	0	0.833498	0.401	0.099	0	F_Microglia1
CH25H	0	0.832651	0.298	0.014	0	F_Microglia1
HSD17B11	0	0.824143	0.337	0.033	0	F_Microglia1
CPM	0	0.818912	0.32	0.02	0	F_Microglia1
STAB1	0	0.814017	0.319	0.026	0	F_Microglia1
LCP1	0	0.812359	0.315	0.02	0	F_Microglia1
MGAT4A	0	0.80242	0.337	0.041	0	F_Microglia1
SLCO2B1	0	0.791047	0.344	0.031	0	F_Microglia1
GAS6	0	0.770251	0.324	0.033	0	F_Microglia1
CNTN1	0	0.763037	0.376	0.059	0	F_Microglia1
RPS12	0	0.762955	0.99	0.971	0	F_Microglia1
ST6GAL1.2nd-hit	0	0.76152	0.334	0.044	0	F_Microglia1
LGALS9	0	0.761432	0.308	0.02	0	F_Microglia1
MT-CO1.BLAST.MPF26.6419	0	0.761031	0.992	0.981	0	F_Microglia1
SLC15A3	0	0.76066	0.291	0.017	0	F_Microglia1
HCLS1	0	0.756398	0.316	0.017	0	F_Microglia1
SLC40A1	0	0.752224	0.31	0.055	0	F_Microglia1
CD300H.BLAST.MPF26.2266	0	0.751933	0.309	0.025	0	F_Microglia1
TREH	0	0.751078	0.291	0.027	0	F_Microglia1
TLR1	0	0.738324	0.284	0.015	0	F_Microglia1
MPF26.18380.gene	0	0.737293	0.572	0.074	0	F_Microglia1
CD68	0	0.731029	0.287	0.019	0	F_Microglia1
NCKAP1L	0	0.730087	0.279	0.012	0	F_Microglia1
MPF26.13150.gene	0	0.720964	0.314	0.031	0	F_Microglia1
DNASE2	0	0.71975	0.314	0.042	0	F_Microglia1
NPL	0	0.71821	0.305	0.03	0	F_Microglia1
SLAMF9	0	0.717935	0.26	0.008	0	F_Microglia1
ATP13A2	0	0.717901	0.342	0.073	0	F_Microglia1
ITGAD	0	0.715693	0.266	0.011	0	F_Microglia1
RPS27	0	0.714752	0.961	0.897	0	F_Microglia1
SSH2	0	0.711685	0.303	0.047	0	F_Microglia1
CCR5	0	0.705234	0.27	0.013	0	F_Microglia1
TMEM173	0	0.702605	0.278	0.018	0	F_Microglia1
HAVCR1	0	0.700248	0.268	0.014	0	F_Microglia1
TPD52	0	0.690332	0.329	0.061	0	F_Microglia1
ITGB2	0	0.689561	0.266	0.013	0	F_Microglia1
LSP1	0	0.67869	0.261	0.017	0	F_Microglia1
HLA-DMA.BLAST.MPF26.20442	0	0.677759	0.261	0.02	0	F_Microglia1
NCF4	0	0.668988	0.255	0.015	0	F_Microglia1
GNS	0	0.658592	0.3	0.055	0	F_Microglia1
HHEX	0	0.650645	0.267	0.029	0	F_Microglia1
PDE5A	0	0.648122	0.278	0.044	0	F_Microglia1
LMO2	0	0.581694	0.268	0.041	0	F_Microglia1
SPP1	0	4.56179	0.962	0.063	0	F_Microglia2
TYROBP	0	2.69024	0.997	0.083	0	F_Microglia2
APOE	0	2.46806	0.963	0.2	0	F_Microglia2
CTSZ	0	2.38572	0.974	0.06	0	F_Microglia2
CST3.BLAST.MPF26.16562	0	2.374	1	0.581	0	F_Microglia2
FCER1G	0	2.34204	1	0.071	0	F_Microglia2
CTSS	0	2.33708	0.989	0.056	0	F_Microglia2
CCL14	0	2.31275	0.929	0.038	0	F_Microglia2
NPC2	0	2.21422	0.999	0.389	0	F_Microglia2
DAB2.2nd-hit	0	2.20696	0.913	0.049	0	F_Microglia2
C1QC	0	2.2056	0.997	0.069	0	F_Microglia2
TREM2.2nd-hit	0	2.15345	0.97	0.06	0	F_Microglia2
TMSB4X.BLAST.MPF26.23293	0	2.05674	0.813	0.242	0	F_Microglia2
C1QA	0	2.05213	0.985	0.073	0	F_Microglia2
SAT1	0	2.04916	0.996	0.407	0	F_Microglia2
RGS10	0	2.03129	0.962	0.107	0	F_Microglia2
VSIG4	0	2.02677	0.962	0.057	0	F_Microglia2
APOC1	0	2.01885	0.906	0.09	0	F_Microglia2
CTSB	0	2.00039	0.896	0.19	0	F_Microglia2
GPR34	0	1.99598	0.965	0.057	0	F_Microglia2
CYBA.BLAST.MPF26.17034	0	1.97244	0.996	0.293	0	F_Microglia2
CD36	0	1.96894	0.802	0.017	0	F_Microglia2
AIF1	0	1.959	0.975	0.06	0	F_Microglia2
B2M	0	1.94539	0.999	0.356	0	F_Microglia2
LY86	0	1.93486	0.967	0.049	0	F_Microglia2
RNASET2	0	1.92204	0.985	0.178	0	F_Microglia2
IFI30	0	1.89602	0.944	0.062	0	F_Microglia2
CD14	0	1.87665	0.922	0.06	0	F_Microglia2
MPF26.4961.gene	0	1.84549	0.899	0.047	0	F_Microglia2
CSTB.BLAST.MPF26.25737	0	1.83302	0.986	0.484	0	F_Microglia2
FCGR1A.BLAST.MPF26.14359	0	1.79669	0.913	0.043	0	F_Microglia2
PNLIP	0	1.77333	0.892	0.045	0	F_Microglia2
VAMP8	0	1.75007	0.962	0.127	0	F_Microglia2
LGALS3	0	1.72894	0.817	0.049	0	F_Microglia2
MPF26.25284.gene	0	1.72621	0.866	0.04	0	F_Microglia2
CCL3.BLAST.MPF26.18344	0	1.71766	0.576	0.018	0	F_Microglia2
CTSD	0	1.71083	0.962	0.28	0	F_Microglia2
GYPC	0	1.67701	0.843	0.099	0	F_Microglia2
SEPP1	0	1.6698	0.781	0.066	0	F_Microglia2
IGF1.2nd-hit	0	1.65286	0.86	0.033	0	F_Microglia2
CTSC	0	1.65073	0.914	0.048	0	F_Microglia2
WFDC18.BLAST.MPF26.18326	0	1.64406	0.617	0.005	0	F_Microglia2
MPF26.13151.gene	0	1.64237	0.936	0.087	0	F_Microglia2
FCGRT	0	1.61875	0.939	0.097	0	F_Microglia2
CCL8	0	1.60778	0.501	0.024	0	F_Microglia2
FOLR2	0	1.59145	0.775	0.026	0	F_Microglia2
CD63	0	1.56684	0.985	0.531	0	F_Microglia2
IL18	0	1.56042	0.857	0.046	0	F_Microglia2
CD300H.BLAST.MPF26.2266	0	1.55705	0.787	0.02	0	F_Microglia2
CLEC7A	0	1.55015	0.894	0.05	0	F_Microglia2
LYVE1	0	1.53543	0.564	0.01	0	F_Microglia2
LST1	0	1.53057	0.817	0.037	0	F_Microglia2
C3	0	1.5201	0.871	0.064	0	F_Microglia2
GPX1	0	1.4959	0.993	0.544	0	F_Microglia2
PSAP	0	1.49536	0.99	0.472	0	F_Microglia2
MPF26.13494.gene	0	1.49103	0.766	0.044	0	F_Microglia2
HLA-DMB.BLAST.MPF26.20445	0	1.44177	0.777	0.036	0	F_Microglia2
LTC4S	0	1.42072	0.864	0.075	0	F_Microglia2
SLC40A1	0	1.41627	0.771	0.05	0	F_Microglia2
PLD3	0	1.40606	0.933	0.271	0	F_Microglia2
ARPC1B	0	1.3985	0.805	0.047	0	F_Microglia2
P2RY12	0	1.38413	0.834	0.06	0	F_Microglia2
PILRA	0	1.3704	0.824	0.044	0	F_Microglia2
MPF26.27544.gene	0	1.36912	0.941	0.219	0	F_Microglia2
GMFG	0	1.35802	0.849	0.103	0	F_Microglia2
CSF1R	0	1.35526	0.846	0.05	0	F_Microglia2
CD53	0	1.35442	0.792	0.037	0	F_Microglia2
SERPINF1	0	1.35042	0.755	0.038	0	F_Microglia2
LGMN	0	1.33899	0.733	0.043	0	F_Microglia2
BLVRB	0	1.33686	0.834	0.145	0	F_Microglia2
UCP2	0	1.3345	0.832	0.164	0	F_Microglia2
MPF26.21825.gene	0	1.32027	0.696	0.028	0	F_Microglia2
CPVL	0	1.3102	0.756	0.037	0	F_Microglia2
MRC1	0	1.30917	0.287	0.003	0	F_Microglia2
SCPEP1	0	1.30492	0.793	0.074	0	F_Microglia2
ARHGDIB	0	1.29461	0.819	0.073	0	F_Microglia2
HSD17B11	0	1.29039	0.702	0.032	0	F_Microglia2
GRN	0	1.29024	0.866	0.163	0	F_Microglia2
FXYD5	0	1.27787	0.781	0.058	0	F_Microglia2
SLC9A8	0	1.23826	0.73	0.051	0	F_Microglia2
NPL	0	1.22096	0.691	0.028	0	F_Microglia2
LAMP1	0	1.2146	0.931	0.273	0	F_Microglia2
HSPB1	0	1.21309	0.857	0.124	0	F_Microglia2
LILRA6.BLAST.MPF26.26582	0	1.21249	0.748	0.035	0	F_Microglia2
MAN2B1	0	1.21169	0.8	0.085	0	F_Microglia2
ATP6V0E1	0	1.20333	0.906	0.271	0	F_Microglia2
GUSB	0	1.19585	0.831	0.158	0	F_Microglia2
DRAM2	0	1.1864	0.916	0.276	0	F_Microglia2
ARPC3	0	1.17608	0.973	0.543	0	F_Microglia2
ALOX5AP	0	1.1741	0.789	0.064	0	F_Microglia2
GAL3ST4	0	1.17367	0.734	0.079	0	F_Microglia2
ANKRD37	0	1.16939	0.752	0.135	0	F_Microglia2
MPF26.18380.gene	0	1.16532	0.871	0.08	0	F_Microglia2
CD86	0	1.15874	0.511	0.002	0	F_Microglia2
FTL	0	1.15857	1	0.984	0	F_Microglia2
RETN	0	1.15096	0.621	0.041	0	F_Microglia2
ITM2B	0	1.13788	1	0.734	0	F_Microglia2
SFT2D1	0	1.13494	0.883	0.22	0	F_Microglia2
SPI1	0	1.13347	0.719	0.032	0	F_Microglia2
ASAH1	0	1.1295	0.763	0.11	0	F_Microglia2
CEP164	0	1.12727	0.82	0.154	0	F_Microglia2
LAPTM5	0	1.12686	0.734	0.034	0	F_Microglia2
KIAA0319	0	1.12578	0.708	0.057	0	F_Microglia2
S100P	0	1.12496	0.477	0.013	0	F_Microglia2
FCRLA	0	1.11672	0.602	0.02	0	F_Microglia2
MT-CO1.BLAST.MPF26.3629	0	1.10093	1	0.995	0	F_Microglia2
CTSH	0	1.09253	0.725	0.094	0	F_Microglia2
CD59	0	1.07692	0.903	0.305	0	F_Microglia2
SLC7A7	0	1.06341	0.654	0.027	0	F_Microglia2
HMOX1	0	1.05975	0.654	0.044	0	F_Microglia2
TMBIM4	0	1.05736	0.822	0.181	0	F_Microglia2
CD37	0	1.04791	0.681	0.032	0	F_Microglia2
PMP22	0	1.04677	0.703	0.084	0	F_Microglia2
GNS	0	1.04112	0.672	0.052	0	F_Microglia2
ADGRF5	0	1.03046	0.743	0.062	0	F_Microglia2
EGFL7	0	1.01276	0.789	0.152	0	F_Microglia2
HTRA1	0	0.997462	0.802	0.147	0	F_Microglia2
MNDA	0	0.988138	0.644	0.042	0	F_Microglia2
TPD52	0	0.982753	0.669	0.059	0	F_Microglia2
S100A11	0	0.982684	0.771	0.183	0	F_Microglia2
CD68	0	0.982322	0.576	0.019	0	F_Microglia2
HEXB	0	0.980071	0.738	0.143	0	F_Microglia2
STAB1	0	0.972625	0.564	0.028	0	F_Microglia2
C1ORF162.BLAST.MPF26.16428	0	0.966259	0.587	0.029	0	F_Microglia2
TSPAN4	0	0.955508	0.617	0.075	0	F_Microglia2
QPCT	0	0.949491	0.569	0.036	0	F_Microglia2
PPT1	0	0.948551	0.702	0.109	0	F_Microglia2
OGFRL1	0	0.944452	0.666	0.093	0	F_Microglia2
FUOM.BLAST.MPF26.1719	0	0.940583	0.649	0.087	0	F_Microglia2
MPF26.6886.gene	0	0.935912	0.609	0.034	0	F_Microglia2
LIPA	0	0.92513	0.559	0.034	0	F_Microglia2
RNF144B	0	0.923131	0.564	0.017	0	F_Microglia2
ANXA1	0	0.918995	0.65	0.075	0	F_Microglia2
MPF26.6882.gene	0	0.911398	0.609	0.039	0	F_Microglia2
MPF26.9486.gene	0	0.904367	0.545	0.025	0	F_Microglia2
CTSA	0	0.887971	0.726	0.141	0	F_Microglia2
RENBP	0	0.880313	0.563	0.033	0	F_Microglia2
CD99.BLAST.MPF26.16973	0	0.877666	0.65	0.149	0	F_Microglia2
MGAT4A	0	0.876705	0.591	0.042	0	F_Microglia2
CD81	0	0.876027	0.777	0.21	0	F_Microglia2
FBP1	0	0.873372	0.533	0.014	0	F_Microglia2
NINJ1	0	0.871095	0.689	0.146	0	F_Microglia2
PTPN18	0	0.866719	0.556	0.029	0	F_Microglia2
CPM	0	0.866101	0.512	0.023	0	F_Microglia2
HNMT	0	0.855907	0.564	0.039	0	F_Microglia2
ABHD12	0	0.849345	0.65	0.105	0	F_Microglia2
IL7R	0	0.84864	0.5	0.04	0	F_Microglia2
M6PR	0	0.841844	0.678	0.125	0	F_Microglia2
RAMP1	0	0.838926	0.56	0.067	0	F_Microglia2
SAMSN1	0	0.836739	0.546	0.033	0	F_Microglia2
LGALS9	0	0.834148	0.519	0.022	0	F_Microglia2
MPF26.17268.gene	0	0.832124	0.444	0.015	0	F_Microglia2
KIAA1551	0	0.830566	0.568	0.091	0	F_Microglia2
ABCA1	0	0.821449	0.548	0.094	0	F_Microglia2
MPEG1	0	0.820547	0.49	0.02	0	F_Microglia2
WDR49	0	0.817147	0.561	0.031	0	F_Microglia2
SIRPA	0	0.814687	0.654	0.112	0	F_Microglia2
IGSF6	0	0.803977	0.531	0.038	0	F_Microglia2
HLA-DMA.BLAST.MPF26.20442	0	0.803368	0.497	0.02	0	F_Microglia2
WNK1	0	0.797389	0.655	0.129	0	F_Microglia2
TMEM60	0	0.794275	0.672	0.158	0	F_Microglia2
ITGA6	0	0.791117	0.606	0.106	0	F_Microglia2
TMEM86A	0	0.789751	0.549	0.054	0	F_Microglia2
LCP1	0	0.786873	0.52	0.023	0	F_Microglia2
UNC93B1	0	0.775412	0.515	0.025	0	F_Microglia2
LYN	0	0.766212	0.589	0.067	0	F_Microglia2
RAPGEF6	0	0.763447	0.595	0.104	0	F_Microglia2
LAMP2	0	0.74729	0.595	0.097	0	F_Microglia2
LMO2	0	0.738115	0.526	0.04	0	F_Microglia2
CLEC2D	0	0.737653	0.459	0.023	0	F_Microglia2
IFNGR1	0	0.720692	0.48	0.053	0	F_Microglia2
OSTF1	0	0.715712	0.647	0.117	0	F_Microglia2
CD44	0	0.714651	0.452	0.025	0	F_Microglia2
ST6GAL1.2nd-hit	0	0.712658	0.486	0.048	0	F_Microglia2
SLC15A3	0	0.704288	0.47	0.02	0	F_Microglia2
CASP1.BLAST.MPF26.12818	0	0.701451	0.495	0.029	0	F_Microglia2
CH25H	0	0.700628	0.418	0.019	0	F_Microglia2
DNASE2	0	0.699052	0.523	0.044	0	F_Microglia2
TREH	0	0.695363	0.42	0.03	0	F_Microglia2
HCLS1	0	0.690976	0.474	0.021	0	F_Microglia2
MPF26.16332.gene	0	0.690533	0.407	0.017	0	F_Microglia2
PDE5A	0	0.688725	0.467	0.046	0	F_Microglia2
SLC31A2	0	0.688295	0.471	0.035	0	F_Microglia2
MPF26.2594.gene	0	0.686802	0.447	0.022	0	F_Microglia2
PYCARD.BLAST.MPF26.27735	0	0.682853	0.372	0.011	0	F_Microglia2
MPF26.13150.gene	0	0.676395	0.475	0.034	0	F_Microglia2
CCDC109B	0	0.671613	0.477	0.049	0	F_Microglia2
NCF4	0	0.670682	0.443	0.016	0	F_Microglia2
ARSA	0	0.670516	0.612	0.125	0	F_Microglia2
CMTM7	0	0.668415	0.477	0.039	0	F_Microglia2
CEBPA	0	0.663695	0.409	0.015	0	F_Microglia2
ARHGAP17	0	0.662766	0.54	0.095	0	F_Microglia2
TMEM173	0	0.655535	0.417	0.021	0	F_Microglia2
ITGB5	0	0.649741	0.469	0.063	0	F_Microglia2
MSN	0	0.641521	0.484	0.052	0	F_Microglia2
SLC37A2	0	0.640342	0.416	0.014	0	F_Microglia2
BHLHE41	0	0.636044	0.417	0.021	0	F_Microglia2
MPF26.23936.gene	0	0.635343	0.557	0.088	0	F_Microglia2
HEXA	0	0.634981	0.481	0.069	0	F_Microglia2
EFHD2	0	0.63095	0.533	0.09	0	F_Microglia2
CCR5	0	0.626223	0.413	0.017	0	F_Microglia2
GAS6	0	0.615488	0.406	0.039	0	F_Microglia2
CD48	0	0.615049	0.392	0.012	0	F_Microglia2
CFP	0	0.602614	0.361	0.02	0	F_Microglia2
ALOX5	0	0.601455	0.38	0.013	0	F_Microglia2
SH3KBP1	0	0.599917	0.48	0.066	0	F_Microglia2
PTPN6	0	0.595476	0.384	0.014	0	F_Microglia2
EVI2A	0	0.593842	0.375	0.013	0	F_Microglia2
PTBP3	0	0.593083	0.451	0.049	0	F_Microglia2
SELPLG	0	0.593042	0.407	0.026	0	F_Microglia2
CPO	0	0.587211	0.263	0.001	0	F_Microglia2
SDCBP	0	0.585746	0.469	0.068	0	F_Microglia2
LY75.BLAST.MPF26.29435	0	0.583893	0.398	0.026	0	F_Microglia2
HHEX	0	0.582991	0.403	0.032	0	F_Microglia2
ABCC1.BLAST.MPF26.24785	0	0.582081	0.384	0.021	0	F_Microglia2
PATR-A.BLAST.MPF26.21953	0	0.577137	0.467	0.049	0	F_Microglia2
HAVCR1	0	0.570386	0.39	0.017	0	F_Microglia2
DAB2	0	0.568072	0.302	0.006	0	F_Microglia2
MAN2A1	0	0.565803	0.371	0.03	0	F_Microglia2
CD300A	0	0.5645	0.384	0.015	0	F_Microglia2
WIPF1	0	0.563123	0.403	0.034	0	F_Microglia2
CNTN1	0	0.56262	0.486	0.064	0	F_Microglia2
ATP6V1B2	0	0.558003	0.377	0.04	0	F_Microglia2
TLR1	0	0.553862	0.377	0.02	0	F_Microglia2
FLI1	0	0.550987	0.375	0.026	0	F_Microglia2
CD7	0	0.55	0.362	0.02	0	F_Microglia2
CLDN1	0	0.546612	0.317	0.011	0	F_Microglia2
EPB41L2	0	0.545913	0.473	0.072	0	F_Microglia2
TGFBR2	0	0.543236	0.353	0.032	0	F_Microglia2
PCDHAC1	0	0.542648	0.425	0.056	0	F_Microglia2
CX3CR1	0	0.53984	0.387	0.036	0	F_Microglia2
MYLIP	0	0.537797	0.272	0.016	0	F_Microglia2
APOBEC3B.BLAST.MPF26.3332	0	0.534512	0.402	0.054	0	F_Microglia2
SAMD9L.BLAST.MPF26.8365	0	0.52954	0.332	0.025	0	F_Microglia2
VAV3	0	0.526947	0.356	0.03	0	F_Microglia2
SYK	0	0.526827	0.341	0.015	0	F_Microglia2
FAM212A	0	0.526058	0.396	0.044	0	F_Microglia2
TGFB1	0	0.524942	0.366	0.027	0	F_Microglia2
KCTD12	0	0.523308	0.443	0.059	0	F_Microglia2
ACSS1	0	0.51464	0.409	0.057	0	F_Microglia2
C5AR1	0	0.513441	0.341	0.014	0	F_Microglia2
RABGAP1L	0	0.508151	0.384	0.051	0	F_Microglia2
SLCO2B1	0	0.503952	0.371	0.038	0	F_Microglia2
TLR3	0	0.503493	0.332	0.03	0	F_Microglia2
SCIMP	0	0.50212	0.346	0.016	0	F_Microglia2
CTSL.BLAST.MPF26.3238	0	0.49854	0.311	0.017	0	F_Microglia2
ITGB2	0	0.497715	0.347	0.017	0	F_Microglia2
MERTK	0	0.497389	0.342	0.016	0	F_Microglia2
ABI3	0	0.496599	0.351	0.026	0	F_Microglia2
CYTH4	0	0.493893	0.337	0.013	0	F_Microglia2
OSCAR	0	0.490961	0.332	0.013	0	F_Microglia2
ZC3H3	0	0.489007	0.376	0.045	0	F_Microglia2
NCKAP1L	0	0.482889	0.327	0.018	0	F_Microglia2
ITGAD	0	0.482716	0.317	0.017	0	F_Microglia2
TNFAIP8L2	0	0.482412	0.347	0.014	0	F_Microglia2
ZFP36	0	0.482267	0.27	0.022	0	F_Microglia2
RAB32	0	0.482203	0.323	0.021	0	F_Microglia2
BIN2	0	0.47856	0.332	0.015	0	F_Microglia2
SH2B3	0	0.474762	0.338	0.027	0	F_Microglia2
VAV1	0	0.47348	0.334	0.012	0	F_Microglia2
IL13RA1	0	0.472403	0.334	0.023	0	F_Microglia2
RBM47	0	0.471432	0.302	0.009	0	F_Microglia2
LSP1	0	0.465989	0.311	0.022	0	F_Microglia2
MPF26.4808.gene	0	0.464998	0.289	0.014	0	F_Microglia2
SOAT1	0	0.464161	0.351	0.031	0	F_Microglia2
SGK1	0	0.46331	0.339	0.038	0	F_Microglia2
IKZF1	0	0.461598	0.315	0.014	0	F_Microglia2
SKAP2	0	0.457907	0.298	0.016	0	F_Microglia2
TNFRSF14	0	0.457905	0.327	0.027	0	F_Microglia2
LCP2	0	0.445214	0.298	0.012	0	F_Microglia2
CALHM6.BLAST.MPF26.25101	0	0.444032	0.298	0.014	0	F_Microglia2
PTPRC	0	0.442769	0.3	0.012	0	F_Microglia2
IL6R	0	0.437047	0.282	0.014	0	F_Microglia2
CD84	0	0.435811	0.281	0.012	0	F_Microglia2
TRPM2	0	0.427408	0.278	0.012	0	F_Microglia2
SRGN.BLAST.MPF26.27323	0	0.427315	0.268	0.015	0	F_Microglia2
PLA2G15	0	0.42147	0.33	0.031	0	F_Microglia2
ARL11	0	0.420778	0.27	0.009	0	F_Microglia2
IL10RB	0	0.418746	0.335	0.037	0	F_Microglia2
FCGR3.BLAST.MPF26.17007	0	0.417483	0.266	0.01	0	F_Microglia2
MPF26.643.gene	0	0.412767	0.304	0.024	0	F_Microglia2
FYB	0	0.410839	0.274	0.01	0	F_Microglia2
TNFSF13	0	0.408916	0.274	0.017	0	F_Microglia2
PTGS1	0	0.407546	0.271	0.016	0	F_Microglia2
ENTPD1	0	0.406055	0.286	0.025	0	F_Microglia2
GBA	0	0.404635	0.294	0.025	0	F_Microglia2
ICAM2	0	0.402438	0.268	0.013	0	F_Microglia2
ST14	0	0.396507	0.257	0.01	0	F_Microglia2
DNASE1L1	0	0.392549	0.253	0.012	0	F_Microglia2
SUSD3	0	0.386364	0.268	0.013	0	F_Microglia2
DOCK8	0	0.384175	0.277	0.023	0	F_Microglia2
TNFRSF1B	0	0.381487	0.253	0.016	0	F_Microglia2
CD180	0	0.380174	0.257	0.015	0	F_Microglia2
DENND2D	0	0.375789	0.255	0.009	0	F_Microglia2
LRMDA.BLAST.MPF26.3004	0	0.374075	0.255	0.014	0	F_Microglia2
PIK3AP1	0	0.368026	0.255	0.009	0	F_Microglia2
PGLYRP2	0	0.362722	0.256	0.009	0	F_Microglia2
TRADD	0	0.32043	0.253	0.021	0	F_Microglia2
MPF26.13494.gene	0	2.30874	0.88	0.057	0	F_Microglia3
C1QC	0	2.28148	1	0.086	0	F_Microglia3
C3	0	2.1875	0.973	0.078	0	F_Microglia3
LTC4S	0	2.18691	0.967	0.088	0	F_Microglia3
C1QA	0	2.12594	0.995	0.089	0	F_Microglia3
VSIG4	0	1.84501	0.957	0.074	0	F_Microglia3
TYROBP	0	1.81589	0.995	0.1	0	F_Microglia3
AIF1	0	1.80013	0.946	0.077	0	F_Microglia3
FCER1G	0	1.75067	0.989	0.088	0	F_Microglia3
LGALS3	0	1.71501	0.875	0.063	0	F_Microglia3
CSF1R	0	1.64288	0.897	0.064	0	F_Microglia3
P2RY12	0	1.62435	0.924	0.074	0	F_Microglia3
IFI30	0	1.60264	0.908	0.078	0	F_Microglia3
CD14	0	1.58286	0.891	0.076	0	F_Microglia3
CTSZ	0	1.58206	0.853	0.078	0	F_Microglia3
PNLIP	0	1.56615	0.81	0.061	0	F_Microglia3
LY86	0	1.55549	0.87	0.066	0	F_Microglia3
TREM2.2nd-hit	0	1.53727	0.929	0.077	0	F_Microglia3
MPF26.4961.gene	0	1.5152	0.87	0.063	0	F_Microglia3
GPR34	0	1.5019	0.929	0.074	0	F_Microglia3
CLEC7A	0	1.48635	0.891	0.066	0	F_Microglia3
CTSS	0	1.45135	0.891	0.074	0	F_Microglia3
FCGR1A.BLAST.MPF26.14359	0	1.40141	0.826	0.059	0	F_Microglia3
MPF26.25284.gene	0	1.31715	0.815	0.056	0	F_Microglia3
CX3CR1	0	1.29906	0.728	0.04	0	F_Microglia3
RETN	0	1.29203	0.712	0.052	0	F_Microglia3
CTSC	0	1.27266	0.815	0.064	0	F_Microglia3
LST1	0	1.26902	0.739	0.052	0	F_Microglia3
PILRA	0	1.21412	0.745	0.059	0	F_Microglia3
CPVL	0	1.1496	0.696	0.05	0	F_Microglia3
SPI1	0	1.13259	0.69	0.045	0	F_Microglia3
CASP1.BLAST.MPF26.12818	0	1.04425	0.641	0.036	0	F_Microglia3
TREH	0	1.03869	0.587	0.037	0	F_Microglia3
MPF26.9486.gene	0	1.02719	0.571	0.034	0	F_Microglia3
STAB1	0	1.01393	0.598	0.037	0	F_Microglia3
SELPLG	0	0.939536	0.549	0.032	0	F_Microglia3
MPF26.4808.gene	0	0.891612	0.429	0.018	0	F_Microglia3
CLDN5	0	3.62743	0.993	0.011	0	F_Endothelial1
MPF26.18380.gene	0	3.49342	0.989	0.078	0	F_Endothelial1
IGFBP7	0	3.1605	0.979	0.054	0	F_Endothelial1
SLC7A5	0	3.06418	0.943	0.071	0	F_Endothelial1
SPARC	0	2.81693	0.994	0.292	0	F_Endothelial1
FN1	0	2.79785	0.952	0.041	0	F_Endothelial1
LYZ	0	2.6245	0.9	0.006	0	F_Endothelial1
MPF26.23341.gene	0	2.39697	0.994	0.508	0	F_Endothelial1
SLC38A5	0	2.37286	0.889	0.004	0	F_Endothelial1
GNG11	0	2.35034	0.88	0.027	0	F_Endothelial1
PECAM1	0	2.34101	0.889	0.001	0	F_Endothelial1
SPARCL1	0	2.31527	0.976	0.169	0	F_Endothelial1
TFRC	0	2.25015	0.785	0.046	0	F_Endothelial1
KDR	0	2.2355	0.856	0.007	0	F_Endothelial1
S100A6	0	2.21444	0.971	0.233	0	F_Endothelial1
EMB	0	2.18886	0.802	0.002	0	F_Endothelial1
SLC7A1	0	2.10758	0.843	0.035	0	F_Endothelial1
APCDD1	0	2.10402	0.875	0.09	0	F_Endothelial1
MFSD2A	0	2.10356	0.825	0.016	0	F_Endothelial1
SLC3A2	0	2.09531	0.898	0.196	0	F_Endothelial1
VWF	0	2.08497	0.827	0.004	0	F_Endothelial1
RAMP2	0	2.08039	0.852	0.018	0	F_Endothelial1
SLC2A1	0	2.0324	0.841	0.068	0	F_Endothelial1
COL4A2	0	2.02102	0.859	0.032	0	F_Endothelial1
ID3	0	2.00115	0.78	0.018	0	F_Endothelial1
HSPB1	0	1.95084	0.892	0.124	0	F_Endothelial1
TMEM88	0	1.92479	0.795	0.011	0	F_Endothelial1
SELENOM.BLAST.MPF26.25475	0	1.87683	0.82	0.071	0	F_Endothelial1
COL18A1	0	1.85376	0.816	0.062	0	F_Endothelial1
ABLIM1	0	1.84965	0.805	0.029	0	F_Endothelial1
ETS1	0	1.84904	0.803	0.018	0	F_Endothelial1
SPTBN1	0	1.77646	0.891	0.191	0	F_Endothelial1
RGCC	0	1.765	0.749	0.095	0	F_Endothelial1
COL4A1	0	1.69944	0.78	0.029	0	F_Endothelial1
ESAM	0	1.69565	0.758	0.007	0	F_Endothelial1
SLC39A10	0	1.68235	0.874	0.258	0	F_Endothelial1
EPAS1	0	1.67751	0.734	0.009	0	F_Endothelial1
GPCPD1	0	1.67365	0.741	0.126	0	F_Endothelial1
POMP	0	1.65226	0.961	0.625	0	F_Endothelial1
PROM1	0	1.64611	0.758	0.021	0	F_Endothelial1
CDH5	0	1.63186	0.727	0.003	0	F_Endothelial1
IFITM3.BLAST.MPF26.6300	0	1.60801	0.741	0.04	0	F_Endothelial1
PODXL	0	1.60195	0.735	0.018	0	F_Endothelial1
IGFBP4	0	1.59319	0.789	0.086	0	F_Endothelial1
ADGRF5	0	1.55011	0.771	0.061	0	F_Endothelial1
FAM101B	0	1.5464	0.716	0.019	0	F_Endothelial1
SLC9A3R2	0	1.52832	0.666	0.025	0	F_Endothelial1
KIAA1462	0	1.52674	0.702	0.007	0	F_Endothelial1
CAV1	0	1.51714	0.693	0.005	0	F_Endothelial1
CD151	0	1.50554	0.769	0.095	0	F_Endothelial1
VAMP8	0	1.49735	0.873	0.13	0	F_Endothelial1
TM4SF18	0	1.49483	0.677	0.001	0	F_Endothelial1
CD34	0	1.49328	0.693	0.007	0	F_Endothelial1
GJA4	0	1.47814	0.392	0.003	0	F_Endothelial1
CDH7	0	1.4714	0.626	0.004	0	F_Endothelial1
LAMA4	0	1.46525	0.681	0.023	0	F_Endothelial1
SLCO2B1	0	1.45985	0.668	0.031	0	F_Endothelial1
PTPRB	0	1.42459	0.633	0.002	0	F_Endothelial1
SLC6A6	0	1.40488	0.544	0.053	0	F_Endothelial1
[truncated: 11,015 more rows]

## Sheet: E.Cluster_percentage.per.sample
Age	Subtype.combined	Cell number in cluster	Total cell number per sample	percent
E25	F_earlyRG	2295	3486	65.8348
E25	F_midRG	4	3486	0.114745
E25	F_lateRG	1	3486	0.0286862
E25	F_IPC	83	3486	2.38095
E25	F_Deep Layer	949	3486	27.2232
E25	F_Upper Layer	92	3486	2.63913
E25	F_ITN	19	3486	0.545037
E25	F_Microglia	5	3486	0.143431
E25	F_Endothelial	4	3486	0.114745
E25	F_mural	9	3486	0.258176
E25	F_unknown	25	3486	0.717154
E34AG	F_midRG	1051	3223	32.6094
E34AG	F_lateRG	763	3223	23.6736
E34AG	F_IPC	1241	3223	38.5045
E34AG	F_Deep Layer	1	3223	0.031027
E34AG	F_Upper Layer	121	3223	3.75427
E34AG	F_ITN	3	3223	0.093081
E34AG	F_Microglia	43	3223	1.33416
E34T	F_earlyRG	1	2260	0.0442478
E34T	F_midRG	422	2260	18.6726
E34T	F_lateRG	285	2260	12.6106
E34T	F_IPC	769	2260	34.0265
E34T	F_OPC	5	2260	0.221239
E34T	F_Deep Layer	2	2260	0.0884956
E34T	F_Upper Layer	651	2260	28.8053
E34T	F_ITN	111	2260	4.9115
E34T	F_Microglia	3	2260	0.132743
E34T	F_mural	8	2260	0.353982
E34T	F_unknown	3	2260	0.132743
E40AG	F_midRG	56	1102	5.08167
E40AG	F_lateRG	375	1102	34.029
E40AG	F_tRG	7	1102	0.635209
E40AG	F_IPC	464	1102	42.1053
E40AG	F_OPC	9	1102	0.816697
E40AG	F_Upper Layer	130	1102	11.7967
E40AG	F_ITN	10	1102	0.907441
E40AG	F_Microglia	50	1102	4.53721
E40AG	F_Endothelial	1	1102	0.0907441
E40T	F_midRG	17	1581	1.07527
E40T	F_lateRG	150	1581	9.48767
E40T	F_tRG	24	1581	1.51803
E40T	F_IPC	487	1581	30.8033
E40T	F_OPC	12	1581	0.759013
E40T	F_Upper Layer	565	1581	35.7369
E40T	F_ITN	320	1581	20.2404
E40T	F_Microglia	6	1581	0.379507
P1AG	F_midRG	6	2681	0.223797
P1AG	F_lateRG	1044	2681	38.9407
P1AG	F_tRG	53	2681	1.97687
P1AG	F_IPC	871	2681	32.4879
P1AG	F_OPC	53	2681	1.97687
P1AG	F_Upper Layer	370	2681	13.8008
P1AG	F_ITN	32	2681	1.19358
P1AG	F_Microglia	241	2681	8.98918
P1AG	F_Endothelial	5	2681	0.186498
P1AG	F_mural	6	2681	0.223797
P1T	F_midRG	1	3641	0.027465
P1T	F_lateRG	243	3641	6.67399
P1T	F_tRG	8	3641	0.21972
P1T	F_IPC	492	3641	13.5128
P1T	F_Ependymal	3	3641	0.0823949
P1T	F_OPC	88	3641	2.41692
P1T	F_Upper Layer	2233	3641	61.3293
P1T	F_ITN	459	3641	12.6064
P1T	F_Microglia	47	3641	1.29085
P1T	F_Endothelial	32	3641	0.878879
P1T	F_mural	34	3641	0.933809
P1T	F_unknown	1	3641	0.027465
P5AG	F_lateRG	737	2429	30.3417
P5AG	F_tRG	122	2429	5.02264
P5AG	F_IPC	287	2429	11.8156
P5AG	F_Ependymal	7	2429	0.288184
P5AG	F_OPC	112	2429	4.61095
P5AG	F_Upper Layer	208	2429	8.56319
P5AG	F_ITN	19	2429	0.782215
P5AG	F_Microglia	699	2429	28.7773
P5AG	F_Endothelial	88	2429	3.62289
P5AG	F_mural	149	2429	6.13421
P5AG	F_unknown	1	2429	0.0411692
P5T	F_midRG	2	2926	0.0683527
P5T	F_lateRG	189	2926	6.45933
P5T	F_tRG	8	2926	0.273411
P5T	F_IPC	223	2926	7.62133
P5T	F_OPC	157	2926	5.36569
P5T	F_Upper Layer	1650	2926	56.391
P5T	F_ITN	531	2926	18.1476
P5T	F_Microglia	61	2926	2.08476
P5T	F_Endothelial	53	2926	1.81135
P5T	F_mural	43	2926	1.46958
P5T	F_unknown	9	2926	0.307587
P10AG	F_lateRG	520	3010	17.2757
P10AG	F_tRG	138	3010	4.58472
P10AG	F_IPC	115	3010	3.8206
P10AG	F_Ependymal	370	3010	12.2924
P10AG	F_OPC	94	3010	3.12292
P10AG	F_Upper Layer	79	3010	2.62458
P10AG	F_ITN	19	3010	0.631229
P10AG	F_Microglia	1080	3010	35.8804
P10AG	F_Endothelial	532	3010	17.6744
P10AG	F_mural	62	3010	2.0598
P10AG	F_unknown	1	3010	0.0332226
P10T	F_lateRG	306	3895	7.85623
P10T	F_tRG	49	3895	1.25802
P10T	F_IPC	176	3895	4.51861
P10T	F_Ependymal	6	3895	0.154044
P10T	F_OPC	699	3895	17.9461
P10T	F_Upper Layer	1236	3895	31.733
P10T	F_ITN	920	3895	23.62
P10T	F_Microglia	200	3895	5.13479
P10T	F_Endothelial	152	3895	3.90244
P10T	F_mural	119	3895	3.0552
P10T	F_unknown	32	3895	0.821566
