# Supplementary material for: Truncated radial glia as a common precursor in the late corticogenesis of gyrencephalic mammals
Source: eLife. 2023 Nov 21;12:RP91406. doi: 10.7554/eLife.91406 (PMC10662950; doi:10.7554/eLife.91406)
Supplement: Supplementary file 5. — (A) Metadata for each cell in the integrated dataset. Ferret data was integrated with Nowakowski et al., 2017 (Science) dataset. (B) Cluster markers used for calculating genescore in Figure 6C–D, obtained from Nowakowski et al., 2017. (C) Correlation between ferret and human cluster markers as shown in Figure 6C–D. (D) Markers shared between ferret and human truncated radial glia (tRG). (E) tRG score for ferret and human cells as shown in Figure 6F. Markers in D were used for calculating tRG score in Figure 3F. [file elife-91406-supp5.xlsx]

## Sheet: A. integrated_metadata_Science
cell id	orig.ident	Age	nCount_RNA	nFeature_RNA	WGCNAcluster	Subtype	Subtype.combined	integrated with Nowakowski et al., 2017 (Science) dataset
Hi_GW21_5.Hi_GW21_5	H_Sci	19	980861	5425	tRG	tRG	H_tRG
Hi_GW16_17.Hi_GW16_17	H_Sci	14	984240	4954	tRG	tRG	H_tRG
Hi_GW16_20.Hi_GW16_20	H_Sci	14	975625	5260	tRG	tRG	H_tRG
Hi_GW16_25.Hi_GW16_25	H_Sci	14	980152	4937	tRG	tRG	H_tRG
O1.A1	H_Sci	18.5	984793	3638	tRG	tRG	H_tRG
O1.E1	H_Sci	18.5	981112	3656	tRG	tRG	H_tRG
O1.H1	H_Sci	18.5	970642	1921	tRG	tRG	H_tRG
O1.F2	H_Sci	18.5	974669	3331	tRG	tRG	H_tRG
O1.G7	H_Sci	18.5	977033	3835	tRG	tRG	H_tRG
O1.H9	H_Sci	18.5	979296	3385	tRG	tRG	H_tRG
O1.H10	H_Sci	18.5	977514	3868	tRG	tRG	H_tRG
O2.A1	H_Sci	18.5	985754	3956	tRG	tRG	H_tRG
O2.B1	H_Sci	18.5	979211	2600	tRG	tRG	H_tRG
O2.F1	H_Sci	18.5	980116	3916	tRG	tRG	H_tRG
O2.G9	H_Sci	18.5	980471	3858	tRG	tRG	H_tRG
O2.B10	H_Sci	18.5	981876	4437	tRG	tRG	H_tRG
O2.E11	H_Sci	18.5	977287	4191	tRG	tRG	H_tRG
O7.B1	H_Sci	14.7	982287	4441	tRG	tRG	H_tRG
O7.D1	H_Sci	14.7	979584	3514	tRG	tRG	H_tRG
O7.F4	H_Sci	14.7	981224	4952	tRG	tRG	H_tRG
O7.E5	H_Sci	14.7	982521	4171	tRG	tRG	H_tRG
O7.C6	H_Sci	14.7	976984	4789	tRG	tRG	H_tRG
O7.B9	H_Sci	14.7	982905	4553	tRG	tRG	H_tRG
O7.D11	H_Sci	14.7	978032	4354	tRG	tRG	H_tRG
O7.F11	H_Sci	14.7	974282	3159	tRG	tRG	H_tRG
O7.D12	H_Sci	14.7	986307	4618	tRG	tRG	H_tRG
O8.F8	H_Sci	14.7	976920	4612	tRG	tRG	H_tRG
O9.D2	H_Sci	14.7	981109	3838	tRG	tRG	H_tRG
O9.F4	H_Sci	14.7	983053	3286	tRG	tRG	H_tRG
O9.B5	H_Sci	14.7	982511	4748	tRG	tRG	H_tRG
O9.F5	H_Sci	14.7	984234	3867	tRG	tRG	H_tRG
O9.A6	H_Sci	14.7	983250	3557	tRG	tRG	H_tRG
O9.G9	H_Sci	14.7	982150	3635	tRG	tRG	H_tRG
O10.F6	H_Sci	14.7	977460	4393	tRG	tRG	H_tRG
O12.B8	H_Sci	22	981840	4066	tRG	tRG	H_tRG
O12.B10	H_Sci	22	980360	3301	tRG	tRG	H_tRG
O12.A12	H_Sci	14.7	984332	3330	tRG	tRG	H_tRG
S3.C2	H_Sci	14.5	978354	2440	tRG	tRG	H_tRG
S3.G3	H_Sci	14.5	979511	2319	tRG	tRG	H_tRG
S3.H3	H_Sci	14.5	973642	2839	tRG	tRG	H_tRG
S3.B6	H_Sci	14.5	979755	3263	tRG	tRG	H_tRG
S3.D8	H_Sci	14.5	980305	2707	tRG	tRG	H_tRG
S16.F4	H_Sci	13	982739	4535	tRG	tRG	H_tRG
S16.E5	H_Sci	13	982718	3746	tRG	tRG	H_tRG
S16.C6	H_Sci	13	984532	3664	tRG	tRG	H_tRG
S16.E6	H_Sci	13	983943	3983	tRG	tRG	H_tRG
S16.F6	H_Sci	13	984593	3706	tRG	tRG	H_tRG
S16.C7	H_Sci	13	979588	3751	tRG	tRG	H_tRG
S16.G8	H_Sci	13	982236	4013	tRG	tRG	H_tRG
S19.G4	H_Sci	14.2	977697	2952	tRG	tRG	H_tRG
S19.B7	H_Sci	14.2	977013	3913	tRG	tRG	H_tRG
S19.C10	H_Sci	14.2	981400	3108	tRG	tRG	H_tRG
S19.D11	H_Sci	14.2	978337	3410	tRG	tRG	H_tRG
S21.A1	H_Sci	14.2	980361	1559	tRG	tRG	H_tRG
S21.E5	H_Sci	14.2	983433	2844	tRG	tRG	H_tRG
S21.G6	H_Sci	14.2	983743	3009	tRG	tRG	H_tRG
S21.A10	H_Sci	14.2	978139	3162	tRG	tRG	H_tRG
S23.F7	H_Sci	13.3	956585	2037	tRG	tRG	H_tRG
S24.C9	H_Sci	13.3	978623	3839	tRG	tRG	H_tRG
S26.G8	H_Sci	17.3	975546	3716	tRG	tRG	H_tRG
S36.F1	H_Sci	16.3	964064	3653	tRG	tRG	H_tRG
S36.B10	H_Sci	16.3	974889	4583	tRG	tRG	H_tRG
S36.D11	H_Sci	16.3	979906	4080	tRG	tRG	H_tRG
S36.F11	H_Sci	16.3	975788	4452	tRG	tRG	H_tRG
S36.G11	H_Sci	16.3	981356	3367	tRG	tRG	H_tRG
S37.C8	H_Sci	16.3	966655	3092	tRG	tRG	H_tRG
S38.H2	H_Sci	16.3	982597	4212	tRG	tRG	H_tRG
S38.C3	H_Sci	16.3	979357	3935	tRG	tRG	H_tRG
S38.E4	H_Sci	16.3	971297	3382	tRG	tRG	H_tRG
S38.G4	H_Sci	16.3	978820	4625	tRG	tRG	H_tRG
S38.G5	H_Sci	16.3	978882	3916	tRG	tRG	H_tRG
S38.D6	H_Sci	16.3	981626	4251	tRG	tRG	H_tRG
S38.H6	H_Sci	16.3	980249	3221	tRG	tRG	H_tRG
S38.B8	H_Sci	16.3	980439	4269	tRG	tRG	H_tRG
S38.A9	H_Sci	16.3	975322	3947	tRG	tRG	H_tRG
S46.G5	H_Sci	21.5	977267	5154	tRG	tRG	H_tRG
S51.E1	H_Sci	11	976630	3250	tRG	tRG	H_tRG
S51.E10	H_Sci	13	984720	3749	tRG	tRG	H_tRG
S51.A11	H_Sci	13	977602	4513	tRG	tRG	H_tRG
S51.A12	H_Sci	13	982461	3915	tRG	tRG	H_tRG
S51.D12	H_Sci	13	985617	3801	tRG	tRG	H_tRG
S53.E4	H_Sci	14.2	973460	3280	tRG	tRG	H_tRG
S53.G4	H_Sci	14.2	978295	3850	tRG	tRG	H_tRG
S54.A12	H_Sci	18.5	981523	4007	tRG	tRG	H_tRG
S55.H4	H_Sci	18.5	983482	4116	tRG	tRG	H_tRG
S84.D11	H_Sci	13	978599	4105	tRG	tRG	H_tRG
S81.B3	H_Sci	15	984613	3272	tRG	tRG	H_tRG
S85.C4	H_Sci	17.5	981868	4154	tRG	tRG	H_tRG
S86.A3	H_Sci	17.5	974307	3173	tRG	tRG	H_tRG
S86.B6	H_Sci	17.5	973628	3601	tRG	tRG	H_tRG
S87.G11	H_Sci	17.5	974307	3135	tRG	tRG	H_tRG
S91.F1	H_Sci	16	981563	3418	tRG	tRG	H_tRG
S91.C2	H_Sci	16	978328	2466	tRG	tRG	H_tRG
S91.A3	H_Sci	16	981146	3478	tRG	tRG	H_tRG
S93.E8	H_Sci	13	967549	4457	tRG	tRG	H_tRG
S94.E2	H_Sci	13	980876	3591	tRG	tRG	H_tRG
S95.D1	H_Sci	13	982597	2929	tRG	tRG	H_tRG
S95.C9	H_Sci	13	977921	3857	tRG	tRG	H_tRG
S96.A3	H_Sci	14	979072	3086	tRG	tRG	H_tRG
S140.D7	H_Sci	20	975851	3993	tRG	tRG	H_tRG
Hi_GW21_8.Hi_GW21_8	H_Sci	19	981707	6882	RG-div1	RG-div1	H_RG-div
O1.G4	H_Sci	18.5	970070	4972	RG-div1	RG-div1	H_RG-div
O4.F10	H_Sci	14	976859	3333	RG-div1	RG-div1	H_RG-div
O7.C2	H_Sci	14.7	982261	4925	RG-div1	RG-div1	H_RG-div
O7.C3	H_Sci	14.7	981432	4864	RG-div1	RG-div1	H_RG-div
O7.H4	H_Sci	14.7	978297	4234	RG-div1	RG-div1	H_RG-div
O7.A5	H_Sci	14.7	981504	4901	RG-div1	RG-div1	H_RG-div
O7.A7	H_Sci	14.7	981543	6499	RG-div1	RG-div1	H_RG-div
O7.B8	H_Sci	14.7	975447	5188	RG-div1	RG-div1	H_RG-div
O7.H8	H_Sci	14.7	978039	4814	RG-div1	RG-div1	H_RG-div
O7.G9	H_Sci	14.7	980589	5426	RG-div1	RG-div1	H_RG-div
O7.F10	H_Sci	14.7	982723	5713	RG-div1	RG-div1	H_RG-div
O7.B12	H_Sci	14.7	980297	5984	RG-div1	RG-div1	H_RG-div
O7.G12	H_Sci	14.7	983265	5017	RG-div1	RG-div1	H_RG-div
O9.D7	H_Sci	14.7	974852	4617	RG-div1	RG-div1	H_RG-div
O9.D8	H_Sci	14.7	976055	4883	RG-div1	RG-div1	H_RG-div
O9.H12	H_Sci	14.7	979627	6466	RG-div1	RG-div1	H_RG-div
O10.A12	H_Sci	14.7	981758	4894	RG-div1	RG-div1	H_RG-div
O12.C1	H_Sci	14	980975	3484	RG-div1	RG-div1	H_RG-div
O12.H1	H_Sci	14	978677	4040	RG-div1	RG-div1	H_RG-div
S1.F2	H_Sci	11	976849	5119	RG-div1	RG-div1	H_RG-div
S1.D9	H_Sci	11	976359	4800	RG-div1	RG-div1	H_RG-div
S1.F11	H_Sci	11	974112	4507	RG-div1	RG-div1	H_RG-div
S2.E3	H_Sci	11	976265	4083	RG-div1	RG-div1	H_RG-div
S2.C7	H_Sci	11	981976	3746	RG-div1	RG-div1	H_RG-div
S2.E9	H_Sci	11	977272	4143	RG-div1	RG-div1	H_RG-div
S2.H10	H_Sci	11	972701	4210	RG-div1	RG-div1	H_RG-div
S3.A1	H_Sci	14.5	982655	1878	RG-div1	RG-div1	H_RG-div
S3.B1	H_Sci	14.5	980922	3317	RG-div1	RG-div1	H_RG-div
S3.F3	H_Sci	14.5	979620	3790	RG-div1	RG-div1	H_RG-div
S3.B4	H_Sci	14.5	980773	4258	RG-div1	RG-div1	H_RG-div
S3.F5	H_Sci	14.5	976419	3451	RG-div1	RG-div1	H_RG-div
S3.H5	H_Sci	14.5	975966	3261	RG-div1	RG-div1	H_RG-div
S3.H6	H_Sci	14.5	977106	3398	RG-div1	RG-div1	H_RG-div
S3.C8	H_Sci	14.5	972813	4037	RG-div1	RG-div1	H_RG-div
S3.E9	H_Sci	14.5	976469	3783	RG-div1	RG-div1	H_RG-div
S3.A10	H_Sci	14.5	965438	2318	RG-div1	RG-div1	H_RG-div
S3.B10	H_Sci	14.5	982754	3997	RG-div1	RG-div1	H_RG-div
S16.F2	H_Sci	13	976648	4542	RG-div1	RG-div1	H_RG-div
S16.B5	H_Sci	13	983891	4961	RG-div1	RG-div1	H_RG-div
S16.B8	H_Sci	13	981452	4931	RG-div1	RG-div1	H_RG-div
S19.E7	H_Sci	14.2	978533	4275	RG-div1	RG-div1	H_RG-div
S19.E9	H_Sci	14.2	980810	4080	RG-div1	RG-div1	H_RG-div
S23.C2	H_Sci	13.3	975668	3885	RG-div1	RG-div1	H_RG-div
S23.D4	H_Sci	13.3	975524	4410	RG-div1	RG-div1	H_RG-div
S23.F5	H_Sci	13.3	977041	4449	RG-div1	RG-div1	H_RG-div
S23.B6	H_Sci	13.3	978779	3745	RG-div1	RG-div1	H_RG-div
S24.D1	H_Sci	13.3	979988	3490	RG-div1	RG-div1	H_RG-div
S24.D11	H_Sci	13.3	978313	4940	RG-div1	RG-div1	H_RG-div
S25.A3	H_Sci	13.3	974581	5465	RG-div1	RG-div1	H_RG-div
S25.B9	H_Sci	13.3	979017	5417	RG-div1	RG-div1	H_RG-div
S26.H2	H_Sci	17.3	971662	4324	RG-div1	RG-div1	H_RG-div
S31.G9	H_Sci	32	977267	4442	RG-div1	RG-div1	H_RG-div
S35.A4	H_Sci	15	971220	2368	RG-div1	RG-div1	H_RG-div
S35.B4	H_Sci	15	977009	2713	RG-div1	RG-div1	H_RG-div
S35.D4	H_Sci	15	979047	3110	RG-div1	RG-div1	H_RG-div
S35.F5	H_Sci	15	974431	2937	RG-div1	RG-div1	H_RG-div
S35.C8	H_Sci	15	977394	3308	RG-div1	RG-div1	H_RG-div
S35.F8	H_Sci	15	975960	3100	RG-div1	RG-div1	H_RG-div
S35.H8	H_Sci	15	975994	3318	RG-div1	RG-div1	H_RG-div
S35.B9	H_Sci	15	978194	3468	RG-div1	RG-div1	H_RG-div
S36.C1	H_Sci	16.3	970224	3474	RG-div1	RG-div1	H_RG-div
S36.A10	H_Sci	16.3	976048	6532	RG-div1	RG-div1	H_RG-div
S36.B12	H_Sci	16.3	972620	5851	RG-div1	RG-div1	H_RG-div
S36.C12	H_Sci	16.3	975046	6693	RG-div1	RG-div1	H_RG-div
S37.A6	H_Sci	16.3	978756	3982	RG-div1	RG-div1	H_RG-div
S38.A1	H_Sci	16.3	977354	9306	RG-div1	RG-div1	H_RG-div
S38.E5	H_Sci	16.3	982309	5040	RG-div1	RG-div1	H_RG-div
S38.H5	H_Sci	16.3	980190	5142	RG-div1	RG-div1	H_RG-div
S38.E6	H_Sci	16.3	983000	5078	RG-div1	RG-div1	H_RG-div
S38.G6	H_Sci	16.3	981549	5452	RG-div1	RG-div1	H_RG-div
S38.F8	H_Sci	16.3	983104	4292	RG-div1	RG-div1	H_RG-div
S38.C9	H_Sci	16.3	976538	5060	RG-div1	RG-div1	H_RG-div
S38.A12	H_Sci	16.3	978960	5498	RG-div1	RG-div1	H_RG-div
S41.G1	H_Sci	13.3	972871	1540	RG-div1	RG-div1	H_RG-div
S41.G12	H_Sci	13.3	974656	3681	RG-div1	RG-div1	H_RG-div
S44.G7	H_Sci	17.5	973264	4495	RG-div1	RG-div1	H_RG-div
S45.B6	H_Sci	21.5	977007	3392	RG-div1	RG-div1	H_RG-div
S46.F2	H_Sci	21.5	981710	3650	RG-div1	RG-div1	H_RG-div
S47.F7	H_Sci	21.5	977643	5343	RG-div1	RG-div1	H_RG-div
S51.A2	H_Sci	11	976514	4231	RG-div1	RG-div1	H_RG-div
S51.G3	H_Sci	14.5	980089	4383	RG-div1	RG-div1	H_RG-div
S51.C10	H_Sci	13	980914	4938	RG-div1	RG-div1	H_RG-div
S51.C11	H_Sci	13	985001	5180	RG-div1	RG-div1	H_RG-div
S51.D11	H_Sci	13	980947	4946	RG-div1	RG-div1	H_RG-div
S54.B12	H_Sci	13.3	980054	5158	RG-div1	RG-div1	H_RG-div
S55.G1	H_Sci	13.3	981675	4455	RG-div1	RG-div1	H_RG-div
S56.F9	H_Sci	13	972616	4605	RG-div1	RG-div1	H_RG-div
S82.B1	H_Sci	11.5	981687	2414	RG-div1	RG-div1	H_RG-div
S82.F1	H_Sci	11.5	988169	1745	RG-div1	RG-div1	H_RG-div
S82.E6	H_Sci	11.5	972623	3945	RG-div1	RG-div1	H_RG-div
S82.H7	H_Sci	11.5	973891	3804	RG-div1	RG-div1	H_RG-div
S82.D9	H_Sci	11.5	984278	4765	RG-div1	RG-div1	H_RG-div
S82.B10	H_Sci	11.5	977771	4943	RG-div1	RG-div1	H_RG-div
S82.F11	H_Sci	11.5	982940	4913	RG-div1	RG-div1	H_RG-div
S82.G11	H_Sci	11.5	979458	4635	RG-div1	RG-div1	H_RG-div
S83.A4	H_Sci	11.5	977969	4648	RG-div1	RG-div1	H_RG-div
S83.C4	H_Sci	11.5	977472	5100	RG-div1	RG-div1	H_RG-div
S83.B5	H_Sci	11.5	972307	3824	RG-div1	RG-div1	H_RG-div
S83.F5	H_Sci	11.5	978164	4776	RG-div1	RG-div1	H_RG-div
S83.E6	H_Sci	11.5	976814	4998	RG-div1	RG-div1	H_RG-div
S83.G6	H_Sci	11.5	980721	5066	RG-div1	RG-div1	H_RG-div
S83.E7	H_Sci	11.5	981675	5258	RG-div1	RG-div1	H_RG-div
S83.G7	H_Sci	11.5	979521	4846	RG-div1	RG-div1	H_RG-div
S83.B8	H_Sci	11.5	975813	4795	RG-div1	RG-div1	H_RG-div
S83.A9	H_Sci	11.5	979315	5087	RG-div1	RG-div1	H_RG-div
S83.C9	H_Sci	11.5	978078	4258	RG-div1	RG-div1	H_RG-div
S84.H7	H_Sci	13	980754	5104	RG-div1	RG-div1	H_RG-div
S84.A8	H_Sci	13	982336	4157	RG-div1	RG-div1	H_RG-div
S84.F8	H_Sci	13	979842	3823	RG-div1	RG-div1	H_RG-div
S84.B10	H_Sci	13	976254	4832	RG-div1	RG-div1	H_RG-div
S84.F11	H_Sci	13	982746	4986	RG-div1	RG-div1	H_RG-div
S81.A1	H_Sci	15	980604	4325	RG-div1	RG-div1	H_RG-div
S81.E3	H_Sci	15	981685	4542	RG-div1	RG-div1	H_RG-div
S81.F4	H_Sci	15	979878	6018	RG-div1	RG-div1	H_RG-div
S81.D5	H_Sci	15	983171	3951	RG-div1	RG-div1	H_RG-div
S86.B11	H_Sci	17.5	977038	4745	RG-div1	RG-div1	H_RG-div
S88.C1	H_Sci	13	979284	2265	RG-div1	RG-div1	H_RG-div
S88.D1	H_Sci	13	971237	2355	RG-div1	RG-div1	H_RG-div
S88.B7	H_Sci	13	984804	4647	RG-div1	RG-div1	H_RG-div
S88.D11	H_Sci	13	983761	4430	RG-div1	RG-div1	H_RG-div
S88.B12	H_Sci	13	978290	5258	RG-div1	RG-div1	H_RG-div
S88.C12	H_Sci	13	978111	5416	RG-div1	RG-div1	H_RG-div
S91.E1	H_Sci	16	981401	4894	RG-div1	RG-div1	H_RG-div
S91.C5	H_Sci	16	978711	4654	RG-div1	RG-div1	H_RG-div
S93.C10	H_Sci	13	977655	6895	RG-div1	RG-div1	H_RG-div
S93.C11	H_Sci	13	970985	4821	RG-div1	RG-div1	H_RG-div
S94.F4	H_Sci	13	979038	2813	RG-div1	RG-div1	H_RG-div
S94.C6	H_Sci	13	977586	4089	RG-div1	RG-div1	H_RG-div
S95.D4	H_Sci	13	980056	4366	RG-div1	RG-div1	H_RG-div
S140.C2	H_Sci	20	975320	4864	RG-div1	RG-div1	H_RG-div
S140.F6	H_Sci	20	974454	4522	RG-div1	RG-div1	H_RG-div
S177.G2	H_Sci	18	978076	4917	RG-div1	RG-div1	H_RG-div
Hi_GW21_1.Hi_GW21_1	H_Sci	19	974320	4623	nEN-early2	nEN-early2	H_nEN-early
Hi_GW21_2.Hi_GW21_2	H_Sci	19	971893	4774	nEN-early2	nEN-early2	H_nEN-early
Hi_GW16_1.Hi_GW16_1	H_Sci	14	969600	3814	nEN-early2	nEN-early2	H_nEN-early
Hi_GW16_12.Hi_GW16_12	H_Sci	14	972780	3429	nEN-early2	nEN-early2	H_nEN-early
Hi_GW16_21.Hi_GW16_21	H_Sci	14	969477	4050	nEN-early2	nEN-early2	H_nEN-early
O1.F1	H_Sci	18.5	971733	2538	nEN-early2	nEN-early2	H_nEN-early
O1.B3	H_Sci	18.5	974055	2467	nEN-early2	nEN-early2	H_nEN-early
O1.C3	H_Sci	18.5	973917	2535	nEN-early2	nEN-early2	H_nEN-early
O1.A4	H_Sci	18.5	973292	3329	nEN-early2	nEN-early2	H_nEN-early
O1.D6	H_Sci	18.5	971468	2941	nEN-early2	nEN-early2	H_nEN-early
O1.F6	H_Sci	18.5	978970	2878	nEN-early2	nEN-early2	H_nEN-early
O1.G6	H_Sci	18.5	969751	2852	nEN-early2	nEN-early2	H_nEN-early
O1.C9	H_Sci	18.5	979456	2603	nEN-early2	nEN-early2	H_nEN-early
O1.H11	H_Sci	18.5	971808	2899	nEN-early2	nEN-early2	H_nEN-early
O1.B12	H_Sci	18.5	980649	2889	nEN-early2	nEN-early2	H_nEN-early
O1.E12	H_Sci	18.5	975167	2721	nEN-early2	nEN-early2	H_nEN-early
O2.H1	H_Sci	18.5	976395	2431	nEN-early2	nEN-early2	H_nEN-early
O2.G2	H_Sci	18.5	973286	2176	nEN-early2	nEN-early2	H_nEN-early
O2.C3	H_Sci	18.5	972924	2623	nEN-early2	nEN-early2	H_nEN-early
O2.D6	H_Sci	18.5	974114	2654	nEN-early2	nEN-early2	H_nEN-early
O2.F6	H_Sci	18.5	976763	2585	nEN-early2	nEN-early2	H_nEN-early
O2.H6	H_Sci	18.5	973303	2663	nEN-early2	nEN-early2	H_nEN-early
O2.H9	H_Sci	18.5	978293	2629	nEN-early2	nEN-early2	H_nEN-early
O2.H11	H_Sci	18.5	974416	2614	nEN-early2	nEN-early2	H_nEN-early
O2.B12	H_Sci	18.5	975819	2495	nEN-early2	nEN-early2	H_nEN-early
O4.B2	H_Sci	14	977193	2901	nEN-early2	nEN-early2	H_nEN-early
O4.E2	H_Sci	14	976846	2593	nEN-early2	nEN-early2	H_nEN-early
O4.F2	H_Sci	14	980466	2662	nEN-early2	nEN-early2	H_nEN-early
O4.C3	H_Sci	14	974252	2800	nEN-early2	nEN-early2	H_nEN-early
O4.F3	H_Sci	14	972644	2510	nEN-early2	nEN-early2	H_nEN-early
O4.G4	H_Sci	14	975579	2532	nEN-early2	nEN-early2	H_nEN-early
O4.B5	H_Sci	14	974326	2550	nEN-early2	nEN-early2	H_nEN-early
O4.D6	H_Sci	14	974545	2263	nEN-early2	nEN-early2	H_nEN-early
O4.G6	H_Sci	14	979572	2891	nEN-early2	nEN-early2	H_nEN-early
O4.B7	H_Sci	14	977713	2659	nEN-early2	nEN-early2	H_nEN-early
O4.C7	H_Sci	14	977551	2615	nEN-early2	nEN-early2	H_nEN-early
O4.D7	H_Sci	14	972875	2916	nEN-early2	nEN-early2	H_nEN-early
O4.F7	H_Sci	14	972887	2693	nEN-early2	nEN-early2	H_nEN-early
O4.G7	H_Sci	14	971954	3000	nEN-early2	nEN-early2	H_nEN-early
O4.D8	H_Sci	14	977253	3020	nEN-early2	nEN-early2	H_nEN-early
O4.E8	H_Sci	14	973258	3060	nEN-early2	nEN-early2	H_nEN-early
O4.F8	H_Sci	14	976804	2892	nEN-early2	nEN-early2	H_nEN-early
O4.A9	H_Sci	14	979930	2088	nEN-early2	nEN-early2	H_nEN-early
O4.B9	H_Sci	14	973270	2979	nEN-early2	nEN-early2	H_nEN-early
O4.D9	H_Sci	14	979475	3034	nEN-early2	nEN-early2	H_nEN-early
O4.E9	H_Sci	14	973664	2844	nEN-early2	nEN-early2	H_nEN-early
O4.F9	H_Sci	14	976192	3351	nEN-early2	nEN-early2	H_nEN-early
O4.B10	H_Sci	14	969831	3497	nEN-early2	nEN-early2	H_nEN-early
O4.D11	H_Sci	14	979929	2600	nEN-early2	nEN-early2	H_nEN-early
O4.E11	H_Sci	14	969123	2657	nEN-early2	nEN-early2	H_nEN-early
O4.H11	H_Sci	14	977892	2719	nEN-early2	nEN-early2	H_nEN-early
O7.F2	H_Sci	14.7	973047	3148	nEN-early2	nEN-early2	H_nEN-early
O7.B6	H_Sci	14.7	976415	3074	nEN-early2	nEN-early2	H_nEN-early
O7.B7	H_Sci	14.7	976743	3557	nEN-early2	nEN-early2	H_nEN-early
O7.C7	H_Sci	14.7	974207	3082	nEN-early2	nEN-early2	H_nEN-early
O7.F9	H_Sci	14.7	969173	3126	nEN-early2	nEN-early2	H_nEN-early
O7.E10	H_Sci	14.7	978599	3348	nEN-early2	nEN-early2	H_nEN-early
O7.B11	H_Sci	14.7	974945	3808	nEN-early2	nEN-early2	H_nEN-early
O7.E11	H_Sci	14.7	978166	3846	nEN-early2	nEN-early2	H_nEN-early
O8.E1	H_Sci	14.7	977250	2501	nEN-early2	nEN-early2	H_nEN-early
O8.G1	H_Sci	14.7	976884	2518	nEN-early2	nEN-early2	H_nEN-early
O8.A2	H_Sci	14.7	972351	3469	nEN-early2	nEN-early2	H_nEN-early
O8.B2	H_Sci	14.7	979118	3075	nEN-early2	nEN-early2	H_nEN-early
O8.E2	H_Sci	14.7	981028	3153	nEN-early2	nEN-early2	H_nEN-early
O8.C3	H_Sci	14.7	967739	2893	nEN-early2	nEN-early2	H_nEN-early
O8.D3	H_Sci	14.7	972617	2959	nEN-early2	nEN-early2	H_nEN-early
O8.F3	H_Sci	14.7	971739	3153	nEN-early2	nEN-early2	H_nEN-early
O8.B4	H_Sci	14.7	978216	3251	nEN-early2	nEN-early2	H_nEN-early
O8.C4	H_Sci	14.7	971195	3090	nEN-early2	nEN-early2	H_nEN-early
O8.E5	H_Sci	14.7	977196	2806	nEN-early2	nEN-early2	H_nEN-early
O8.G5	H_Sci	14.7	975118	3065	nEN-early2	nEN-early2	H_nEN-early
O8.B6	H_Sci	14.7	969083	3000	nEN-early2	nEN-early2	H_nEN-early
O8.C6	H_Sci	14.7	976489	2993	nEN-early2	nEN-early2	H_nEN-early
O8.D6	H_Sci	14.7	976136	3021	nEN-early2	nEN-early2	H_nEN-early
O8.C8	H_Sci	14.7	970385	3520	nEN-early2	nEN-early2	H_nEN-early
O8.B9	H_Sci	14.7	976615	2858	nEN-early2	nEN-early2	H_nEN-early
O8.D9	H_Sci	14.7	973516	2800	nEN-early2	nEN-early2	H_nEN-early
O8.C11	H_Sci	14.7	975314	3284	nEN-early2	nEN-early2	H_nEN-early
O8.E11	H_Sci	14.7	970602	2978	nEN-early2	nEN-early2	H_nEN-early
O8.F11	H_Sci	14.7	975891	3218	nEN-early2	nEN-early2	H_nEN-early
O8.C12	H_Sci	14.7	979550	3569	nEN-early2	nEN-early2	H_nEN-early
O8.F12	H_Sci	14.7	974804	2968	nEN-early2	nEN-early2	H_nEN-early
O9.E1	H_Sci	14.7	974742	4255	nEN-early2	nEN-early2	H_nEN-early
O9.B2	H_Sci	14.7	977413	2918	nEN-early2	nEN-early2	H_nEN-early
O9.C2	H_Sci	14.7	979461	2928	nEN-early2	nEN-early2	H_nEN-early
O9.G3	H_Sci	14.7	974837	2863	nEN-early2	nEN-early2	H_nEN-early
O9.D5	H_Sci	14.7	963154	2560	nEN-early2	nEN-early2	H_nEN-early
O9.B6	H_Sci	14.7	979511	2923	nEN-early2	nEN-early2	H_nEN-early
O9.C6	H_Sci	14.7	974254	2615	nEN-early2	nEN-early2	H_nEN-early
O9.D6	H_Sci	14.7	971226	2640	nEN-early2	nEN-early2	H_nEN-early
O9.B7	H_Sci	14.7	975571	2454	nEN-early2	nEN-early2	H_nEN-early
O9.G7	H_Sci	14.7	973550	2866	nEN-early2	nEN-early2	H_nEN-early
O9.A8	H_Sci	14.7	978577	2578	nEN-early2	nEN-early2	H_nEN-early
O9.F9	H_Sci	14.7	975075	3189	nEN-early2	nEN-early2	H_nEN-early
O9.A10	H_Sci	14.7	969297	2874	nEN-early2	nEN-early2	H_nEN-early
O9.B12	H_Sci	14.7	979051	2898	nEN-early2	nEN-early2	H_nEN-early
O9.E12	H_Sci	14.7	977749	3245	nEN-early2	nEN-early2	H_nEN-early
O10.D1	H_Sci	14.7	986472	3267	nEN-early2	nEN-early2	H_nEN-early
O10.B2	H_Sci	14.7	975888	3311	nEN-early2	nEN-early2	H_nEN-early
O10.G2	H_Sci	14.7	966122	2161	nEN-early2	nEN-early2	H_nEN-early
O10.F4	H_Sci	14.7	971094	2040	nEN-early2	nEN-early2	H_nEN-early
O10.H4	H_Sci	14.7	979543	1887	nEN-early2	nEN-early2	H_nEN-early
O10.A5	H_Sci	14.7	974846	3665	nEN-early2	nEN-early2	H_nEN-early
O10.B5	H_Sci	14.7	976356	3115	nEN-early2	nEN-early2	H_nEN-early
O10.C5	H_Sci	14.7	980352	3467	nEN-early2	nEN-early2	H_nEN-early
O10.F5	H_Sci	14.7	970911	2801	nEN-early2	nEN-early2	H_nEN-early
O10.G5	H_Sci	14.7	968717	2495	nEN-early2	nEN-early2	H_nEN-early
O10.H5	H_Sci	14.7	976392	2259	nEN-early2	nEN-early2	H_nEN-early
O10.B6	H_Sci	14.7	977803	2894	nEN-early2	nEN-early2	H_nEN-early
O10.C6	H_Sci	14.7	971570	3303	nEN-early2	nEN-early2	H_nEN-early
O10.D6	H_Sci	14.7	978190	3180	nEN-early2	nEN-early2	H_nEN-early
O10.E6	H_Sci	14.7	975246	3032	nEN-early2	nEN-early2	H_nEN-early
O10.A7	H_Sci	14.7	978688	3376	nEN-early2	nEN-early2	H_nEN-early
O10.B7	H_Sci	14.7	975494	3655	nEN-early2	nEN-early2	H_nEN-early
O10.G7	H_Sci	14.7	983662	3040	nEN-early2	nEN-early2	H_nEN-early
O10.F8	H_Sci	14.7	974101	3161	nEN-early2	nEN-early2	H_nEN-early
O10.B9	H_Sci	14.7	981181	3835	nEN-early2	nEN-early2	H_nEN-early
O10.C9	H_Sci	14.7	977887	3664	nEN-early2	nEN-early2	H_nEN-early
O10.D9	H_Sci	14.7	977032	2887	nEN-early2	nEN-early2	H_nEN-early
O10.F9	H_Sci	14.7	978557	3034	nEN-early2	nEN-early2	H_nEN-early
O10.B10	H_Sci	14.7	978744	3418	nEN-early2	nEN-early2	H_nEN-early
O10.C10	H_Sci	14.7	979863	3230	nEN-early2	nEN-early2	H_nEN-early
O10.A11	H_Sci	14.7	972324	2908	nEN-early2	nEN-early2	H_nEN-early
O10.B11	H_Sci	14.7	972621	3300	nEN-early2	nEN-early2	H_nEN-early
O10.D11	H_Sci	14.7	971864	2780	nEN-early2	nEN-early2	H_nEN-early
O10.C12	H_Sci	14.7	977232	3547	nEN-early2	nEN-early2	H_nEN-early
O10.E12	H_Sci	14.7	976523	3469	nEN-early2	nEN-early2	H_nEN-early
O10.F12	H_Sci	14.7	974700	3114	nEN-early2	nEN-early2	H_nEN-early
O10.G12	H_Sci	14.7	974334	2274	nEN-early2	nEN-early2	H_nEN-early
O12.H3	H_Sci	14	970703	2116	nEN-early2	nEN-early2	H_nEN-early
O12.D5	H_Sci	14	965662	2646	nEN-early2	nEN-early2	H_nEN-early
O12.H5	H_Sci	14	971248	2618	nEN-early2	nEN-early2	H_nEN-early
O12.A6	H_Sci	14	968571	2389	nEN-early2	nEN-early2	H_nEN-early
O12.E6	H_Sci	14	970759	2619	nEN-early2	nEN-early2	H_nEN-early
O12.F12	H_Sci	14.7	982494	2703	nEN-early2	nEN-early2	H_nEN-early
S1.D1	H_Sci	11	980947	2295	nEN-early2	nEN-early2	H_nEN-early
S1.B12	H_Sci	11	968293	2890	nEN-early2	nEN-early2	H_nEN-early
S1.C12	H_Sci	11	980346	2995	nEN-early2	nEN-early2	H_nEN-early
S1.D12	H_Sci	11	979835	2540	nEN-early2	nEN-early2	H_nEN-early
S2.F2	H_Sci	11	981311	3065	nEN-early2	nEN-early2	H_nEN-early
S2.B5	H_Sci	11	970824	2791	nEN-early2	nEN-early2	H_nEN-early
S2.E5	H_Sci	11	977541	2883	nEN-early2	nEN-early2	H_nEN-early
S2.G5	H_Sci	11	978128	3050	nEN-early2	nEN-early2	H_nEN-early
S2.D6	H_Sci	11	959668	1782	nEN-early2	nEN-early2	H_nEN-early
S2.H6	H_Sci	11	977013	3324	nEN-early2	nEN-early2	H_nEN-early
S2.B7	H_Sci	11	974804	2878	nEN-early2	nEN-early2	H_nEN-early
S14.C11	H_Sci	19	973479	2811	nEN-early2	nEN-early2	H_nEN-early
S14.G12	H_Sci	19	963005	3139	nEN-early2	nEN-early2	H_nEN-early
S16.A6	H_Sci	13	973120	2969	nEN-early2	nEN-early2	H_nEN-early
S16.A7	H_Sci	13	982363	2756	nEN-early2	nEN-early2	H_nEN-early
S16.B7	H_Sci	13	976973	2951	nEN-early2	nEN-early2	H_nEN-early
S16.G9	H_Sci	13	979071	2231	nEN-early2	nEN-early2	H_nEN-early
S16.D10	H_Sci	13	973970	2666	nEN-early2	nEN-early2	H_nEN-early
S16.B11	H_Sci	13	972150	2767	nEN-early2	nEN-early2	H_nEN-early
S17.D3	H_Sci	13	977125	2835	nEN-early2	nEN-early2	H_nEN-early
S17.A7	H_Sci	13	975574	3409	nEN-early2	nEN-early2	H_nEN-early
S19.E4	H_Sci	14.2	979422	3000	nEN-early2	nEN-early2	H_nEN-early
S20.D1	H_Sci	14.2	975986	1381	nEN-early2	nEN-early2	H_nEN-early
S20.C10	H_Sci	14.2	976170	2452	nEN-early2	nEN-early2	H_nEN-early
S20.H11	H_Sci	14.2	980926	2176	nEN-early2	nEN-early2	H_nEN-early
S20.D12	H_Sci	14.2	969409	2128	nEN-early2	nEN-early2	H_nEN-early
S21.C1	H_Sci	14.2	971085	2028	nEN-early2	nEN-early2	H_nEN-early
S21.A2	H_Sci	14.2	971591	3564	nEN-early2	nEN-early2	H_nEN-early
S21.B2	H_Sci	14.2	981691	2250	nEN-early2	nEN-early2	H_nEN-early
S21.F3	H_Sci	14.2	980966	2530	nEN-early2	nEN-early2	H_nEN-early
S21.C7	H_Sci	14.2	983879	2268	nEN-early2	nEN-early2	H_nEN-early
S21.C8	H_Sci	14.2	963613	2199	nEN-early2	nEN-early2	H_nEN-early
S21.D8	H_Sci	14.2	969347	2095	nEN-early2	nEN-early2	H_nEN-early
S21.B9	H_Sci	14.2	975782	2599	nEN-early2	nEN-early2	H_nEN-early
S22.F9	H_Sci	13.3	979005	2795	nEN-early2	nEN-early2	H_nEN-early
S22.G9	H_Sci	13.3	959825	2758	nEN-early2	nEN-early2	H_nEN-early
S22.D11	H_Sci	19	971297	2562	nEN-early2	nEN-early2	H_nEN-early
S23.D6	H_Sci	13.3	964890	2691	nEN-early2	nEN-early2	H_nEN-early
S23.E12	H_Sci	13.3	975079	3157	nEN-early2	nEN-early2	H_nEN-early
S24.A7	H_Sci	13.3	975579	3280	nEN-early2	nEN-early2	H_nEN-early
S24.E7	H_Sci	13.3	980450	2963	nEN-early2	nEN-early2	H_nEN-early
S26.A1	H_Sci	17.3	971637	2490	nEN-early2	nEN-early2	H_nEN-early
S26.B1	H_Sci	17.3	982363	1426	nEN-early2	nEN-early2	H_nEN-early
S26.E2	H_Sci	17.3	972496	2054	nEN-early2	nEN-early2	H_nEN-early
S26.B10	H_Sci	17.3	976123	2392	nEN-early2	nEN-early2	H_nEN-early
S27.A1	H_Sci	17.3	970481	1873	nEN-early2	nEN-early2	H_nEN-early
S27.D7	H_Sci	17.3	975626	2978	nEN-early2	nEN-early2	H_nEN-early
S27.F8	H_Sci	17.3	974743	2266	nEN-early2	nEN-early2	H_nEN-early
S27.E10	H_Sci	17.3	981014	2966	nEN-early2	nEN-early2	H_nEN-early
S27.G10	H_Sci	17.3	973317	2613	nEN-early2	nEN-early2	H_nEN-early
S36.E1	H_Sci	16.3	951109	3017	nEN-early2	nEN-early2	H_nEN-early
S36.D6	H_Sci	16.3	974450	3339	nEN-early2	nEN-early2	H_nEN-early
S36.C11	H_Sci	16.3	963476	3125	nEN-early2	nEN-early2	H_nEN-early
S36.E12	H_Sci	16.3	966109	3281	nEN-early2	nEN-early2	H_nEN-early
S37.A1	H_Sci	16.3	975902	2833	nEN-early2	nEN-early2	H_nEN-early
S37.B1	H_Sci	16.3	980736	2510	nEN-early2	nEN-early2	H_nEN-early
S37.G1	H_Sci	16.3	967205	3098	nEN-early2	nEN-early2	H_nEN-early
S37.B2	H_Sci	16.3	978506	2588	nEN-early2	nEN-early2	H_nEN-early
S37.F2	H_Sci	16.3	975413	2800	nEN-early2	nEN-early2	H_nEN-early
S37.A3	H_Sci	16.3	974582	3206	nEN-early2	nEN-early2	H_nEN-early
S37.C3	H_Sci	16.3	976744	2855	nEN-early2	nEN-early2	H_nEN-early
S37.E3	H_Sci	16.3	967489	2748	nEN-early2	nEN-early2	H_nEN-early
S37.D4	H_Sci	16.3	971106	2338	nEN-early2	nEN-early2	H_nEN-early
S37.H4	H_Sci	16.3	973705	2435	nEN-early2	nEN-early2	H_nEN-early
S37.B5	H_Sci	16.3	977486	3207	nEN-early2	nEN-early2	H_nEN-early
S37.E5	H_Sci	16.3	966519	2941	nEN-early2	nEN-early2	H_nEN-early
S37.G5	H_Sci	16.3	970059	3134	nEN-early2	nEN-early2	H_nEN-early
S37.D6	H_Sci	16.3	971133	2860	nEN-early2	nEN-early2	H_nEN-early
S37.A7	H_Sci	16.3	976627	3360	nEN-early2	nEN-early2	H_nEN-early
S37.B7	H_Sci	16.3	974213	2299	nEN-early2	nEN-early2	H_nEN-early
S37.D8	H_Sci	16.3	979399	2633	nEN-early2	nEN-early2	H_nEN-early
S37.D9	H_Sci	16.3	973444	2824	nEN-early2	nEN-early2	H_nEN-early
S37.E9	H_Sci	16.3	971129	2557	nEN-early2	nEN-early2	H_nEN-early
S37.A10	H_Sci	16.3	975966	2884	nEN-early2	nEN-early2	H_nEN-early
S37.B10	H_Sci	16.3	975498	2494	nEN-early2	nEN-early2	H_nEN-early
S37.C10	H_Sci	16.3	977989	2820	nEN-early2	nEN-early2	H_nEN-early
S37.D10	H_Sci	16.3	974073	2772	nEN-early2	nEN-early2	H_nEN-early
S37.D11	H_Sci	16.3	970120	3011	nEN-early2	nEN-early2	H_nEN-early
S37.E11	H_Sci	16.3	970381	2781	nEN-early2	nEN-early2	H_nEN-early
S37.G12	H_Sci	16.3	973816	2834	nEN-early2	nEN-early2	H_nEN-early
S38.E2	H_Sci	16.3	972442	3086	nEN-early2	nEN-early2	H_nEN-early
S38.C5	H_Sci	16.3	968472	3172	nEN-early2	nEN-early2	H_nEN-early
S38.C7	H_Sci	16.3	973881	3029	nEN-early2	nEN-early2	H_nEN-early
S38.D7	H_Sci	16.3	965017	3024	nEN-early2	nEN-early2	H_nEN-early
S38.F7	H_Sci	16.3	965642	3263	nEN-early2	nEN-early2	H_nEN-early
S38.G7	H_Sci	16.3	971426	3061	nEN-early2	nEN-early2	H_nEN-early
S38.E8	H_Sci	16.3	977153	2610	nEN-early2	nEN-early2	H_nEN-early
S38.G8	H_Sci	16.3	978356	2820	nEN-early2	nEN-early2	H_nEN-early
S38.H8	H_Sci	16.3	972589	2990	nEN-early2	nEN-early2	H_nEN-early
S38.B10	H_Sci	16.3	979308	3261	nEN-early2	nEN-early2	H_nEN-early
S38.C10	H_Sci	16.3	975389	3326	nEN-early2	nEN-early2	H_nEN-early
S38.D10	H_Sci	16.3	964773	2558	nEN-early2	nEN-early2	H_nEN-early
S38.C11	H_Sci	16.3	977173	3164	nEN-early2	nEN-early2	H_nEN-early
S38.F11	H_Sci	16.3	972557	2852	nEN-early2	nEN-early2	H_nEN-early
S41.H1	H_Sci	13.3	979557	2724	nEN-early2	nEN-early2	H_nEN-early
S41.H10	H_Sci	13.3	975245	2303	nEN-early2	nEN-early2	H_nEN-early
S42.A2	H_Sci	13.3	974482	3400	nEN-early2	nEN-early2	H_nEN-early
S42.B6	H_Sci	13.3	974025	2498	nEN-early2	nEN-early2	H_nEN-early
S42.G6	H_Sci	18.5	969658	2497	nEN-early2	nEN-early2	H_nEN-early
S42.H7	H_Sci	18.5	977276	2941	nEN-early2	nEN-early2	H_nEN-early
S42.G9	H_Sci	18.5	977780	3357	nEN-early2	nEN-early2	H_nEN-early
S42.C11	H_Sci	18.5	972116	3176	nEN-early2	nEN-early2	H_nEN-early
S44.H5	H_Sci	17.5	978089	2477	nEN-early2	nEN-early2	H_nEN-early
S44.B6	H_Sci	17.5	969157	2686	nEN-early2	nEN-early2	H_nEN-early
S44.G8	H_Sci	17.5	970140	2613	nEN-early2	nEN-early2	H_nEN-early
S44.H8	H_Sci	17.5	975469	1972	nEN-early2	nEN-early2	H_nEN-early
S44.A9	H_Sci	17.5	978203	3889	nEN-early2	nEN-early2	H_nEN-early
S44.C9	H_Sci	17.5	972129	2183	nEN-early2	nEN-early2	H_nEN-early
S44.F9	H_Sci	17.5	970068	2848	nEN-early2	nEN-early2	H_nEN-early
S44.G9	H_Sci	17.5	977635	2954	nEN-early2	nEN-early2	H_nEN-early
S44.H9	H_Sci	17.5	958549	2727	nEN-early2	nEN-early2	H_nEN-early
S44.A11	H_Sci	17.5	974553	2452	nEN-early2	nEN-early2	H_nEN-early
S45.B2	H_Sci	21.5	974834	2859	nEN-early2	nEN-early2	H_nEN-early
S45.H2	H_Sci	21.5	977132	2528	nEN-early2	nEN-early2	H_nEN-early
S45.G4	H_Sci	21.5	953777	2242	nEN-early2	nEN-early2	H_nEN-early
S45.H7	H_Sci	21.5	971952	2671	nEN-early2	nEN-early2	H_nEN-early
S45.E8	H_Sci	21.5	970070	2414	nEN-early2	nEN-early2	H_nEN-early
S45.A10	H_Sci	21.5	978865	2614	nEN-early2	nEN-early2	H_nEN-early
S46.A1	H_Sci	21.5	972704	2364	nEN-early2	nEN-early2	H_nEN-early
S46.G2	H_Sci	21.5	975317	2998	nEN-early2	nEN-early2	H_nEN-early
S46.H2	H_Sci	21.5	959739	2520	nEN-early2	nEN-early2	H_nEN-early
S46.A4	H_Sci	21.5	976520	2857	nEN-early2	nEN-early2	H_nEN-early
S46.H5	H_Sci	21.5	958181	2274	nEN-early2	nEN-early2	H_nEN-early
S46.G6	H_Sci	21.5	965105	2627	nEN-early2	nEN-early2	H_nEN-early
S46.B7	H_Sci	21.5	971318	2470	nEN-early2	nEN-early2	H_nEN-early
S46.C7	H_Sci	21.5	978476	2619	nEN-early2	nEN-early2	H_nEN-early
S46.G7	H_Sci	21.5	970829	2939	nEN-early2	nEN-early2	H_nEN-early
S46.E8	H_Sci	21.5	969689	2663	nEN-early2	nEN-early2	H_nEN-early
S46.A9	H_Sci	21.5	968660	2956	nEN-early2	nEN-early2	H_nEN-early
S46.C11	H_Sci	21.5	969011	2419	nEN-early2	nEN-early2	H_nEN-early
S46.F11	H_Sci	21.5	974172	2830	nEN-early2	nEN-early2	H_nEN-early
S46.B12	H_Sci	21.5	974512	2780	nEN-early2	nEN-early2	H_nEN-early
S47.H6	H_Sci	21.5	972733	2791	nEN-early2	nEN-early2	H_nEN-early
S47.A8	H_Sci	21.5	984499	3000	nEN-early2	nEN-early2	H_nEN-early
S47.B9	H_Sci	21.5	969206	2507	nEN-early2	nEN-early2	H_nEN-early
S47.C9	H_Sci	21.5	953837	2873	nEN-early2	nEN-early2	H_nEN-early
S50.G9	H_Sci	11	980209	3436	nEN-early2	nEN-early2	H_nEN-early
S50.F10	H_Sci	11	974033	3753	nEN-early2	nEN-early2	H_nEN-early
S50.D12	H_Sci	11	971996	3451	nEN-early2	nEN-early2	H_nEN-early
S51.A1	H_Sci	11	975236	2936	nEN-early2	nEN-early2	H_nEN-early
S51.G10	H_Sci	13	979464	2962	nEN-early2	nEN-early2	H_nEN-early
S51.E12	H_Sci	13	969394	2470	nEN-early2	nEN-early2	H_nEN-early
S52.B1	H_Sci	13	976508	2337	nEN-early2	nEN-early2	H_nEN-early
S52.E2	H_Sci	13	974721	1722	nEN-early2	nEN-early2	H_nEN-early
S52.C3	H_Sci	13	975575	2433	nEN-early2	nEN-early2	H_nEN-early
S52.H12	H_Sci	14.2	973406	2573	nEN-early2	nEN-early2	H_nEN-early
S53.C2	H_Sci	14.2	969077	2473	nEN-early2	nEN-early2	H_nEN-early
S53.E3	H_Sci	14.2	974337	2420	nEN-early2	nEN-early2	H_nEN-early
S53.A5	H_Sci	14.2	965837	2298	nEN-early2	nEN-early2	H_nEN-early
S53.D5	H_Sci	14.2	983625	2725	nEN-early2	nEN-early2	H_nEN-early
S53.C9	H_Sci	13.3	974851	2492	nEN-early2	nEN-early2	H_nEN-early
S53.H9	H_Sci	13.3	973453	2845	nEN-early2	nEN-early2	H_nEN-early
S54.C12	H_Sci	13.3	970623	2957	nEN-early2	nEN-early2	H_nEN-early
S54.D12	H_Sci	13.3	977182	4129	nEN-early2	nEN-early2	H_nEN-early
S55.D1	H_Sci	13.3	971719	3085	nEN-early2	nEN-early2	H_nEN-early
S55.A2	H_Sci	13.3	973308	3062	nEN-early2	nEN-early2	H_nEN-early
S55.D2	H_Sci	13.3	976783	3103	nEN-early2	nEN-early2	H_nEN-early
S55.F2	H_Sci	13.3	975273	2799	nEN-early2	nEN-early2	H_nEN-early
S55.H2	H_Sci	13.3	961906	2152	nEN-early2	nEN-early2	H_nEN-early
S55.G3	H_Sci	18.5	974076	3257	nEN-early2	nEN-early2	H_nEN-early
S55.D4	H_Sci	18.5	971977	3057	nEN-early2	nEN-early2	H_nEN-early
S56.G1	H_Sci	13	972853	2486	nEN-early2	nEN-early2	H_nEN-early
S56.D3	H_Sci	13	978112	3093	nEN-early2	nEN-early2	H_nEN-early
S56.F3	H_Sci	13	969000	2605	nEN-early2	nEN-early2	H_nEN-early
S56.C4	H_Sci	13	962724	2128	nEN-early2	nEN-early2	H_nEN-early
S56.E5	H_Sci	13	973164	2588	nEN-early2	nEN-early2	H_nEN-early
S56.D7	H_Sci	13	973143	3591	nEN-early2	nEN-early2	H_nEN-early
S56.E7	H_Sci	13	961398	1669	nEN-early2	nEN-early2	H_nEN-early
S56.H7	H_Sci	13	973077	3040	nEN-early2	nEN-early2	H_nEN-early
S56.C8	H_Sci	13	971579	3198	nEN-early2	nEN-early2	H_nEN-early
S56.D9	H_Sci	13	974737	2889	nEN-early2	nEN-early2	H_nEN-early
S56.F10	H_Sci	13	971414	2711	nEN-early2	nEN-early2	H_nEN-early
S56.A12	H_Sci	13	977442	3110	nEN-early2	nEN-early2	H_nEN-early
S56.E12	H_Sci	13	968876	2515	nEN-early2	nEN-early2	H_nEN-early
S56.H12	H_Sci	13	972620	2977	nEN-early2	nEN-early2	H_nEN-early
S72.D6	H_Sci	17.7	975608	3222	nEN-early2	nEN-early2	H_nEN-early
S72.D7	H_Sci	17.7	977129	3326	nEN-early2	nEN-early2	H_nEN-early
S72.D8	H_Sci	17.7	975500	3081	nEN-early2	nEN-early2	H_nEN-early
S82.H1	H_Sci	11.5	978720	2456	nEN-early2	nEN-early2	H_nEN-early
S82.H2	H_Sci	11.5	978217	2689	nEN-early2	nEN-early2	H_nEN-early
S82.B4	H_Sci	11.5	978214	2906	nEN-early2	nEN-early2	H_nEN-early
S82.A6	H_Sci	11.5	975158	2858	nEN-early2	nEN-early2	H_nEN-early
S82.H11	H_Sci	11.5	979509	3271	nEN-early2	nEN-early2	H_nEN-early
S84.H8	H_Sci	13	982329	2991	nEN-early2	nEN-early2	H_nEN-early
S84.F12	H_Sci	13	979287	3069	nEN-early2	nEN-early2	H_nEN-early
S81.D1	H_Sci	15	975877	2823	nEN-early2	nEN-early2	H_nEN-early
S81.G1	H_Sci	15	974742	2965	nEN-early2	nEN-early2	H_nEN-early
S81.E2	H_Sci	15	973267	2913	nEN-early2	nEN-early2	H_nEN-early
S81.H2	H_Sci	15	977426	2546	nEN-early2	nEN-early2	H_nEN-early
S81.F3	H_Sci	15	969966	2521	nEN-early2	nEN-early2	H_nEN-early
S81.C4	H_Sci	15	976604	2292	nEN-early2	nEN-early2	H_nEN-early
S81.E5	H_Sci	15	976437	3504	nEN-early2	nEN-early2	H_nEN-early
S81.G5	H_Sci	15	967271	2956	nEN-early2	nEN-early2	H_nEN-early
S81.H5	H_Sci	15	973604	2319	nEN-early2	nEN-early2	H_nEN-early
S81.B6	H_Sci	15	969049	3193	nEN-early2	nEN-early2	H_nEN-early
S81.D6	H_Sci	15	981433	2674	nEN-early2	nEN-early2	H_nEN-early
S81.G6	H_Sci	15	974012	3516	nEN-early2	nEN-early2	H_nEN-early
S81.H6	H_Sci	15	981621	2236	nEN-early2	nEN-early2	H_nEN-early
S81.E7	H_Sci	15	971526	3399	nEN-early2	nEN-early2	H_nEN-early
S81.E8	H_Sci	15	965950	3010	nEN-early2	nEN-early2	H_nEN-early
S81.G8	H_Sci	15	978311	2260	nEN-early2	nEN-early2	H_nEN-early
S81.H8	H_Sci	15	972291	3415	nEN-early2	nEN-early2	H_nEN-early
S81.C9	H_Sci	15	970244	2331	nEN-early2	nEN-early2	H_nEN-early
S81.E9	H_Sci	15	974679	3493	nEN-early2	nEN-early2	H_nEN-early
S81.A10	H_Sci	15	974936	3373	nEN-early2	nEN-early2	H_nEN-early
S81.D10	H_Sci	15	978997	3059	nEN-early2	nEN-early2	H_nEN-early
S81.E10	H_Sci	15	967532	3054	nEN-early2	nEN-early2	H_nEN-early
S81.C11	H_Sci	15	971717	2181	nEN-early2	nEN-early2	H_nEN-early
S81.D11	H_Sci	15	968261	2777	nEN-early2	nEN-early2	H_nEN-early
S81.H11	H_Sci	15	970277	2619	nEN-early2	nEN-early2	H_nEN-early
S81.C12	H_Sci	15	975262	3851	nEN-early2	nEN-early2	H_nEN-early
S81.E12	H_Sci	15	972863	3291	nEN-early2	nEN-early2	H_nEN-early
S85.F1	H_Sci	17.5	963692	2394	nEN-early2	nEN-early2	H_nEN-early
S85.E2	H_Sci	17.5	967284	2713	nEN-early2	nEN-early2	H_nEN-early
S85.H2	H_Sci	17.5	976701	2778	nEN-early2	nEN-early2	H_nEN-early
S85.C5	H_Sci	17.5	963437	2373	nEN-early2	nEN-early2	H_nEN-early
S85.A6	H_Sci	17.5	966392	2638	nEN-early2	nEN-early2	H_nEN-early
S85.F8	H_Sci	17.5	950661	2642	nEN-early2	nEN-early2	H_nEN-early
S85.E9	H_Sci	17.5	971059	2589	nEN-early2	nEN-early2	H_nEN-early
S85.F10	H_Sci	17.5	981293	2748	nEN-early2	nEN-early2	H_nEN-early
S85.A12	H_Sci	17.5	980860	3175	nEN-early2	nEN-early2	H_nEN-early
S86.A1	H_Sci	17.5	974704	3027	nEN-early2	nEN-early2	H_nEN-early
S86.G1	H_Sci	17.5	966207	1891	nEN-early2	nEN-early2	H_nEN-early
S86.E2	H_Sci	17.5	977185	2452	nEN-early2	nEN-early2	H_nEN-early
S86.D3	H_Sci	17.5	967781	2532	nEN-early2	nEN-early2	H_nEN-early
S86.G3	H_Sci	17.5	983130	2456	nEN-early2	nEN-early2	H_nEN-early
S86.E4	H_Sci	17.5	974267	2226	nEN-early2	nEN-early2	H_nEN-early
S86.E5	H_Sci	17.5	983264	2886	nEN-early2	nEN-early2	H_nEN-early
S86.E6	H_Sci	17.5	973071	2231	nEN-early2	nEN-early2	H_nEN-early
S86.G7	H_Sci	17.5	976975	2173	nEN-early2	nEN-early2	H_nEN-early
S86.C8	H_Sci	17.5	963720	2731	nEN-early2	nEN-early2	H_nEN-early
S86.B9	H_Sci	17.5	982572	2574	nEN-early2	nEN-early2	H_nEN-early
S86.A10	H_Sci	17.5	975967	2864	nEN-early2	nEN-early2	H_nEN-early
S86.B10	H_Sci	17.5	976132	2715	nEN-early2	nEN-early2	H_nEN-early
S88.G1	H_Sci	13	977592	2906	nEN-early2	nEN-early2	H_nEN-early
S88.C4	H_Sci	13	977013	2839	nEN-early2	nEN-early2	H_nEN-early
S88.E4	H_Sci	13	970950	2854	nEN-early2	nEN-early2	H_nEN-early
S88.A6	H_Sci	13	975245	2067	nEN-early2	nEN-early2	H_nEN-early
S88.C6	H_Sci	13	970247	2842	nEN-early2	nEN-early2	H_nEN-early
S91.A1	H_Sci	16	967048	2739	nEN-early2	nEN-early2	H_nEN-early
S91.H2	H_Sci	16	982728	2985	nEN-early2	nEN-early2	H_nEN-early
S91.E3	H_Sci	16	973278	2922	nEN-early2	nEN-early2	H_nEN-early
S91.F3	H_Sci	16	976074	2602	nEN-early2	nEN-early2	H_nEN-early
S91.A4	H_Sci	16	974630	2574	nEN-early2	nEN-early2	H_nEN-early
S91.B4	H_Sci	16	977182	2796	nEN-early2	nEN-early2	H_nEN-early
S91.F4	H_Sci	16	975350	3123	nEN-early2	nEN-early2	H_nEN-early
S91.H4	H_Sci	16	966928	2862	nEN-early2	nEN-early2	H_nEN-early
S91.F5	H_Sci	16	973903	2884	nEN-early2	nEN-early2	H_nEN-early
S91.H6	H_Sci	16	974986	2878	nEN-early2	nEN-early2	H_nEN-early
S91.C8	H_Sci	16	966247	2220	nEN-early2	nEN-early2	H_nEN-early
S91.A9	H_Sci	16	972442	2338	nEN-early2	nEN-early2	H_nEN-early
S94.A1	H_Sci	13	974076	2095	nEN-early2	nEN-early2	H_nEN-early
S94.B1	H_Sci	13	982503	1819	nEN-early2	nEN-early2	H_nEN-early
S94.C2	H_Sci	13	975005	2610	nEN-early2	nEN-early2	H_nEN-early
S94.D3	H_Sci	13	949087	2168	nEN-early2	nEN-early2	H_nEN-early
S94.G6	H_Sci	13	977410	2802	nEN-early2	nEN-early2	H_nEN-early
S94.A7	H_Sci	13	976418	2642	nEN-early2	nEN-early2	H_nEN-early
S94.D7	H_Sci	13	976125	3128	nEN-early2	nEN-early2	H_nEN-early
S94.A8	H_Sci	13	975923	2961	nEN-early2	nEN-early2	H_nEN-early
S94.H8	H_Sci	13	974625	2491	nEN-early2	nEN-early2	H_nEN-early
S94.D9	H_Sci	13	975735	2670	nEN-early2	nEN-early2	H_nEN-early
S94.F9	H_Sci	13	977099	2637	nEN-early2	nEN-early2	H_nEN-early
S94.D12	H_Sci	13	973219	2526	nEN-early2	nEN-early2	H_nEN-early
S94.E12	H_Sci	13	972712	2605	nEN-early2	nEN-early2	H_nEN-early
S94.G12	H_Sci	13	977728	2934	nEN-early2	nEN-early2	H_nEN-early
S95.G1	H_Sci	13	976035	2679	nEN-early2	nEN-early2	H_nEN-early
S95.H1	H_Sci	13	967018	2658	nEN-early2	nEN-early2	H_nEN-early
S95.E2	H_Sci	13	964566	3138	nEN-early2	nEN-early2	H_nEN-early
S95.F2	H_Sci	13	961754	2607	nEN-early2	nEN-early2	H_nEN-early
S95.D3	H_Sci	13	976823	2844	nEN-early2	nEN-early2	H_nEN-early
S95.B4	H_Sci	13	974597	2292	nEN-early2	nEN-early2	H_nEN-early
S95.A5	H_Sci	13	967585	2674	nEN-early2	nEN-early2	H_nEN-early
S95.G6	H_Sci	13	980050	2509	nEN-early2	nEN-early2	H_nEN-early
S95.B7	H_Sci	13	970740	2912	nEN-early2	nEN-early2	H_nEN-early
S95.G7	H_Sci	13	972937	2773	nEN-early2	nEN-early2	H_nEN-early
S95.D9	H_Sci	13	972125	2879	nEN-early2	nEN-early2	H_nEN-early
S95.A10	H_Sci	13	971818	2898	nEN-early2	nEN-early2	H_nEN-early
S95.G10	H_Sci	13	974568	3268	nEN-early2	nEN-early2	H_nEN-early
S95.H10	H_Sci	13	966614	1906	nEN-early2	nEN-early2	H_nEN-early
S95.H11	H_Sci	13	969079	2589	nEN-early2	nEN-early2	H_nEN-early
S95.B12	H_Sci	13	970671	2638	nEN-early2	nEN-early2	H_nEN-early
S95.G12	H_Sci	13	975214	3258	nEN-early2	nEN-early2	H_nEN-early
S96.A2	H_Sci	14	978133	4465	nEN-early2	nEN-early2	H_nEN-early
S96.H2	H_Sci	14	975769	2641	nEN-early2	nEN-early2	H_nEN-early
S96.C3	H_Sci	14	977225	2986	nEN-early2	nEN-early2	H_nEN-early
S96.F3	H_Sci	14	975251	1932	nEN-early2	nEN-early2	H_nEN-early
S96.A5	H_Sci	14	972300	2809	nEN-early2	nEN-early2	H_nEN-early
S96.D5	H_Sci	14	960698	2682	nEN-early2	nEN-early2	H_nEN-early
S96.G5	H_Sci	14	971896	2707	nEN-early2	nEN-early2	H_nEN-early
S96.A6	H_Sci	14	981142	2462	nEN-early2	nEN-early2	H_nEN-early
S96.E8	H_Sci	14	975910	2797	nEN-early2	nEN-early2	H_nEN-early
S96.A9	H_Sci	14	975517	3125	nEN-early2	nEN-early2	H_nEN-early
S96.B9	H_Sci	14	976792	2689	nEN-early2	nEN-early2	H_nEN-early
S96.D9	H_Sci	14	964997	2290	nEN-early2	nEN-early2	H_nEN-early
S96.C10	H_Sci	14	968608	2777	nEN-early2	nEN-early2	H_nEN-early
S96.G10	H_Sci	14	974949	2921	nEN-early2	nEN-early2	H_nEN-early
S96.B11	H_Sci	14	974411	3191	nEN-early2	nEN-early2	H_nEN-early
S96.D11	H_Sci	14	977840	2368	nEN-early2	nEN-early2	H_nEN-early
S96.A12	H_Sci	14	974303	2950	nEN-early2	nEN-early2	H_nEN-early
S96.F12	H_Sci	14	955581	3571	nEN-early2	nEN-early2	H_nEN-early
S103.D1	H_Sci	17	985202	1586	nEN-early2	nEN-early2	H_nEN-early
S103.F2	H_Sci	17	974610	2707	nEN-early2	nEN-early2	H_nEN-early
S103.F5	H_Sci	17	981537	2636	nEN-early2	nEN-early2	H_nEN-early
S103.A9	H_Sci	17	978190	2918	nEN-early2	nEN-early2	H_nEN-early
S103.F9	H_Sci	17	976435	2640	nEN-early2	nEN-early2	H_nEN-early
S103.D11	H_Sci	17	981012	2892	nEN-early2	nEN-early2	H_nEN-early
S113.E6	H_Sci	21.5	971770	2049	nEN-early2	nEN-early2	H_nEN-early
S113.B9	H_Sci	21.5	981494	3097	nEN-early2	nEN-early2	H_nEN-early
S113.E11	H_Sci	21.5	976568	2678	nEN-early2	nEN-early2	H_nEN-early
S140.E1	H_Sci	20	974388	2558	nEN-early2	nEN-early2	H_nEN-early
S140.F5	H_Sci	20	961927	2772	nEN-early2	nEN-early2	H_nEN-early
S140.H6	H_Sci	20	972946	2510	nEN-early2	nEN-early2	H_nEN-early
S140.B7	H_Sci	20	973701	3009	nEN-early2	nEN-early2	H_nEN-early
S140.E7	H_Sci	20	962954	2366	nEN-early2	nEN-early2	H_nEN-early
S140.G7	H_Sci	20	975831	3101	nEN-early2	nEN-early2	H_nEN-early
S140.B9	H_Sci	20	979067	3142	nEN-early2	nEN-early2	H_nEN-early
S140.E9	H_Sci	20	972958	2783	nEN-early2	nEN-early2	H_nEN-early
S140.E10	H_Sci	20	973846	2931	nEN-early2	nEN-early2	H_nEN-early
S140.E11	H_Sci	20	975869	2493	nEN-early2	nEN-early2	H_nEN-early
S177.D7	H_Sci	18	979886	3183	nEN-early2	nEN-early2	H_nEN-early
Hi_GW21_3.Hi_GW21_3	H_Sci	19	977106	3872	nEN-late	nEN-late	H_nEN-late
Hi_GW16_8.Hi_GW16_8	H_Sci	14	984583	3346	nEN-late	nEN-late	H_nEN-late
Hi_GW16_19.Hi_GW16_19	H_Sci	14	972734	3759	nEN-late	nEN-late	H_nEN-late
O1.D2	H_Sci	18.5	970034	2254	nEN-late	nEN-late	H_nEN-late
O1.E2	H_Sci	18.5	969256	2270	nEN-late	nEN-late	H_nEN-late
O1.G2	H_Sci	18.5	975527	2168	nEN-late	nEN-late	H_nEN-late
O1.D3	H_Sci	18.5	972182	2392	nEN-late	nEN-late	H_nEN-late
O1.C4	H_Sci	18.5	966542	2421	nEN-late	nEN-late	H_nEN-late
O1.D4	H_Sci	18.5	959628	2157	nEN-late	nEN-late	H_nEN-late
O1.C6	H_Sci	18.5	966920	2412	nEN-late	nEN-late	H_nEN-late
O1.C7	H_Sci	18.5	966824	2300	nEN-late	nEN-late	H_nEN-late
O1.E7	H_Sci	18.5	967165	2193	nEN-late	nEN-late	H_nEN-late
O1.F7	H_Sci	18.5	972950	1809	nEN-late	nEN-late	H_nEN-late
O1.H8	H_Sci	18.5	968077	2049	nEN-late	nEN-late	H_nEN-late
O1.A9	H_Sci	18.5	972213	2218	nEN-late	nEN-late	H_nEN-late
O1.B9	H_Sci	18.5	968866	2329	nEN-late	nEN-late	H_nEN-late
O1.F9	H_Sci	18.5	973267	2731	nEN-late	nEN-late	H_nEN-late
O1.D10	H_Sci	18.5	973637	2505	nEN-late	nEN-late	H_nEN-late
O1.E11	H_Sci	18.5	964072	2442	nEN-late	nEN-late	H_nEN-late
O1.C12	H_Sci	18.5	961845	2059	nEN-late	nEN-late	H_nEN-late
O1.D12	H_Sci	18.5	976818	2055	nEN-late	nEN-late	H_nEN-late
O2.C1	H_Sci	18.5	972832	2374	nEN-late	nEN-late	H_nEN-late
O2.A2	H_Sci	18.5	976940	2165	nEN-late	nEN-late	H_nEN-late
O2.D2	H_Sci	18.5	975728	1988	nEN-late	nEN-late	H_nEN-late
O2.F2	H_Sci	18.5	963898	1762	nEN-late	nEN-late	H_nEN-late
O2.H2	H_Sci	18.5	972809	1759	nEN-late	nEN-late	H_nEN-late
O2.H3	H_Sci	18.5	970515	1966	nEN-late	nEN-late	H_nEN-late
O2.B5	H_Sci	18.5	972215	2539	nEN-late	nEN-late	H_nEN-late
O2.D5	H_Sci	18.5	968109	2150	nEN-late	nEN-late	H_nEN-late
O2.A6	H_Sci	18.5	974794	2449	nEN-late	nEN-late	H_nEN-late
O2.G6	H_Sci	18.5	972795	2318	nEN-late	nEN-late	H_nEN-late
O2.A7	H_Sci	18.5	973210	3141	nEN-late	nEN-late	H_nEN-late
O2.D7	H_Sci	18.5	969762	1802	nEN-late	nEN-late	H_nEN-late
O2.E7	H_Sci	18.5	973868	2265	nEN-late	nEN-late	H_nEN-late
O2.G7	H_Sci	18.5	976033	2603	nEN-late	nEN-late	H_nEN-late
O2.H8	H_Sci	18.5	970513	2075	nEN-late	nEN-late	H_nEN-late
O2.E9	H_Sci	18.5	976513	2437	nEN-late	nEN-late	H_nEN-late
O2.C10	H_Sci	18.5	970510	2203	nEN-late	nEN-late	H_nEN-late
O2.F10	H_Sci	18.5	965460	2126	nEN-late	nEN-late	H_nEN-late
O2.G10	H_Sci	18.5	965015	2325	nEN-late	nEN-late	H_nEN-late
O2.H10	H_Sci	18.5	970714	2318	nEN-late	nEN-late	H_nEN-late
O2.G12	H_Sci	18.5	964023	3087	nEN-late	nEN-late	H_nEN-late
O2.H12	H_Sci	18.5	957125	1710	nEN-late	nEN-late	H_nEN-late
O4.B3	H_Sci	14	971028	2174	nEN-late	nEN-late	H_nEN-late
O4.E3	H_Sci	14	964369	1810	nEN-late	nEN-late	H_nEN-late
O4.G3	H_Sci	14	968963	2081	nEN-late	nEN-late	H_nEN-late
O4.A6	H_Sci	14	971309	2131	nEN-late	nEN-late	H_nEN-late
O4.C9	H_Sci	14	972582	2402	nEN-late	nEN-late	H_nEN-late
O4.G10	H_Sci	14	977793	2574	nEN-late	nEN-late	H_nEN-late
O10.B1	H_Sci	14.7	983640	1649	nEN-late	nEN-late	H_nEN-late
O10.D2	H_Sci	14.7	976109	2666	nEN-late	nEN-late	H_nEN-late
O10.E11	H_Sci	14.7	970524	2847	nEN-late	nEN-late	H_nEN-late
O12.E3	H_Sci	14	944709	1480	nEN-late	nEN-late	H_nEN-late
O12.F3	H_Sci	14	964238	1878	nEN-late	nEN-late	H_nEN-late
O12.F4	H_Sci	14	971208	1674	nEN-late	nEN-late	H_nEN-late
O12.F5	H_Sci	14	975083	2096	nEN-late	nEN-late	H_nEN-late
O12.G6	H_Sci	14	980868	1651	nEN-late	nEN-late	H_nEN-late
O12.B7	H_Sci	14	977961	1856	nEN-late	nEN-late	H_nEN-late
O12.H7	H_Sci	14	961786	1717	nEN-late	nEN-late	H_nEN-late
O12.C9	H_Sci	22	972076	2284	nEN-late	nEN-late	H_nEN-late
S3.G10	H_Sci	14.5	985476	1389	nEN-late	nEN-late	H_nEN-late
S16.F1	H_Sci	13	979089	2788	nEN-late	nEN-late	H_nEN-late
S16.F10	H_Sci	13	958722	2151	nEN-late	nEN-late	H_nEN-late
S16.A12	H_Sci	13	974352	1461	nEN-late	nEN-late	H_nEN-late
S17.C1	H_Sci	13	980129	1802	nEN-late	nEN-late	H_nEN-late
S19.A7	H_Sci	14.2	979592	2501	nEN-late	nEN-late	H_nEN-late
S19.B12	H_Sci	14.2	987649	1728	nEN-late	nEN-late	H_nEN-late
S19.C12	H_Sci	14.2	977250	2450	nEN-late	nEN-late	H_nEN-late
S20.H8	H_Sci	14.2	967026	2031	nEN-late	nEN-late	H_nEN-late
S21.E1	H_Sci	14.2	983709	2151	nEN-late	nEN-late	H_nEN-late
S21.C3	H_Sci	14.2	983495	1754	nEN-late	nEN-late	H_nEN-late
S21.B4	H_Sci	14.2	965026	1355	nEN-late	nEN-late	H_nEN-late
S21.E4	H_Sci	14.2	969932	1830	nEN-late	nEN-late	H_nEN-late
S21.B5	H_Sci	14.2	965699	1597	nEN-late	nEN-late	H_nEN-late
S21.H9	H_Sci	14.2	978779	2057	nEN-late	nEN-late	H_nEN-late
S26.D1	H_Sci	17.3	979262	1854	nEN-late	nEN-late	H_nEN-late
S26.H1	H_Sci	17.3	976047	1822	nEN-late	nEN-late	H_nEN-late
S26.C3	H_Sci	17.3	963064	2207	nEN-late	nEN-late	H_nEN-late
S26.A4	H_Sci	17.3	959527	1926	nEN-late	nEN-late	H_nEN-late
S26.C5	H_Sci	17.3	962849	1786	nEN-late	nEN-late	H_nEN-late
S26.D5	H_Sci	17.3	972520	1976	nEN-late	nEN-late	H_nEN-late
S26.G5	H_Sci	17.3	961824	2084	nEN-late	nEN-late	H_nEN-late
S26.G6	H_Sci	17.3	974430	1914	nEN-late	nEN-late	H_nEN-late
S26.H6	H_Sci	17.3	974705	2980	nEN-late	nEN-late	H_nEN-late
S26.E7	H_Sci	17.3	967131	1742	nEN-late	nEN-late	H_nEN-late
S26.F7	H_Sci	17.3	978478	2078	nEN-late	nEN-late	H_nEN-late
S26.G9	H_Sci	17.3	971416	1832	nEN-late	nEN-late	H_nEN-late
S26.D10	H_Sci	17.3	966526	2094	nEN-late	nEN-late	H_nEN-late
S26.H11	H_Sci	17.3	973976	2202	nEN-late	nEN-late	H_nEN-late
S27.H1	H_Sci	17.3	980795	1715	nEN-late	nEN-late	H_nEN-late
S27.A2	H_Sci	17.3	966900	2324	nEN-late	nEN-late	H_nEN-late
S27.G2	H_Sci	17.3	978320	2300	nEN-late	nEN-late	H_nEN-late
S27.A3	H_Sci	17.3	973173	2223	nEN-late	nEN-late	H_nEN-late
S27.B4	H_Sci	17.3	975117	1620	nEN-late	nEN-late	H_nEN-late
S27.D4	H_Sci	17.3	975661	2078	nEN-late	nEN-late	H_nEN-late
S27.E4	H_Sci	17.3	979139	2217	nEN-late	nEN-late	H_nEN-late
S27.F4	H_Sci	17.3	964400	2197	nEN-late	nEN-late	H_nEN-late
S27.H4	H_Sci	17.3	970900	2152	nEN-late	nEN-late	H_nEN-late
S27.A5	H_Sci	17.3	962406	1939	nEN-late	nEN-late	H_nEN-late
S27.C5	H_Sci	17.3	972780	2247	nEN-late	nEN-late	H_nEN-late
S27.E5	H_Sci	17.3	967404	1720	nEN-late	nEN-late	H_nEN-late
S27.B6	H_Sci	17.3	973343	1648	nEN-late	nEN-late	H_nEN-late
S27.G6	H_Sci	17.3	966313	2186	nEN-late	nEN-late	H_nEN-late
S27.B7	H_Sci	17.3	979537	1876	nEN-late	nEN-late	H_nEN-late
S27.G7	H_Sci	17.3	984949	1070	nEN-late	nEN-late	H_nEN-late
S27.D8	H_Sci	17.3	976912	1743	nEN-late	nEN-late	H_nEN-late
S27.E9	H_Sci	17.3	965200	2004	nEN-late	nEN-late	H_nEN-late
S27.F9	H_Sci	17.3	960281	1460	nEN-late	nEN-late	H_nEN-late
S27.C10	H_Sci	17.3	979862	1996	nEN-late	nEN-late	H_nEN-late
S27.F11	H_Sci	17.3	976906	1937	nEN-late	nEN-late	H_nEN-late
S27.G11	H_Sci	17.3	977374	1967	nEN-late	nEN-late	H_nEN-late
S27.A12	H_Sci	17.3	974634	2440	nEN-late	nEN-late	H_nEN-late
S27.C12	H_Sci	17.3	973385	2033	nEN-late	nEN-late	H_nEN-late
S33.H1	H_Sci	32	970934	1134	nEN-late	nEN-late	H_nEN-late
S35.B8	H_Sci	15	963542	1392	nEN-late	nEN-late	H_nEN-late
S36.D9	H_Sci	16.3	953553	2406	nEN-late	nEN-late	H_nEN-late
S36.E9	H_Sci	16.3	977302	2957	nEN-late	nEN-late	H_nEN-late
S37.D2	H_Sci	16.3	976986	2315	nEN-late	nEN-late	H_nEN-late
S37.B3	H_Sci	16.3	979466	2518	nEN-late	nEN-late	H_nEN-late
S37.A4	H_Sci	16.3	971667	2877	nEN-late	nEN-late	H_nEN-late
S37.F5	H_Sci	16.3	975387	1947	nEN-late	nEN-late	H_nEN-late
S37.B6	H_Sci	16.3	972882	2430	nEN-late	nEN-late	H_nEN-late
S37.C6	H_Sci	16.3	973463	2272	nEN-late	nEN-late	H_nEN-late
S37.G6	H_Sci	16.3	971592	2420	nEN-late	nEN-late	H_nEN-late
S37.C7	H_Sci	16.3	959689	2283	nEN-late	nEN-late	H_nEN-late
S37.G8	H_Sci	16.3	975661	2221	nEN-late	nEN-late	H_nEN-late
S37.F9	H_Sci	16.3	967080	2712	nEN-late	nEN-late	H_nEN-late
S37.E10	H_Sci	16.3	974052	2453	nEN-late	nEN-late	H_nEN-late
S37.G10	H_Sci	16.3	982247	2435	nEN-late	nEN-late	H_nEN-late
S38.A3	H_Sci	16.3	975012	2520	nEN-late	nEN-late	H_nEN-late
S38.B3	H_Sci	16.3	985628	1021	nEN-late	nEN-late	H_nEN-late
S38.H4	H_Sci	16.3	971317	2051	nEN-late	nEN-late	H_nEN-late
S38.C6	H_Sci	16.3	971421	2373	nEN-late	nEN-late	H_nEN-late
S38.D9	H_Sci	16.3	969552	2790	nEN-late	nEN-late	H_nEN-late
S38.G9	H_Sci	16.3	976035	3144	nEN-late	nEN-late	H_nEN-late
S41.E4	H_Sci	13.3	978366	2177	nEN-late	nEN-late	H_nEN-late
S42.B3	H_Sci	13.3	967334	2625	nEN-late	nEN-late	H_nEN-late
S42.D4	H_Sci	13.3	951723	2157	nEN-late	nEN-late	H_nEN-late
S42.B8	H_Sci	18.5	969165	2490	nEN-late	nEN-late	H_nEN-late
S42.H8	H_Sci	18.5	976274	2460	nEN-late	nEN-late	H_nEN-late
S42.E9	H_Sci	18.5	966703	2718	nEN-late	nEN-late	H_nEN-late
S42.A10	H_Sci	18.5	969248	2134	nEN-late	nEN-late	H_nEN-late
S42.C10	H_Sci	18.5	975475	2469	nEN-late	nEN-late	H_nEN-late
S42.G11	H_Sci	18.5	976241	2452	nEN-late	nEN-late	H_nEN-late
S44.B7	H_Sci	17.5	959864	2457	nEN-late	nEN-late	H_nEN-late
S44.F10	H_Sci	17.5	973566	2590	nEN-late	nEN-late	H_nEN-late
S45.D2	H_Sci	21.5	982249	2278	nEN-late	nEN-late	H_nEN-late
S45.B4	H_Sci	21.5	973206	2067	nEN-late	nEN-late	H_nEN-late
S45.E4	H_Sci	21.5	954797	1652	nEN-late	nEN-late	H_nEN-late
S45.F4	H_Sci	21.5	946760	2219	nEN-late	nEN-late	H_nEN-late
S45.H4	H_Sci	21.5	978493	1030	nEN-late	nEN-late	H_nEN-late
S45.A6	H_Sci	21.5	979033	1771	nEN-late	nEN-late	H_nEN-late
S45.C6	H_Sci	21.5	974032	1453	nEN-late	nEN-late	H_nEN-late
S45.A7	H_Sci	21.5	972019	2587	nEN-late	nEN-late	H_nEN-late
S45.B8	H_Sci	21.5	976962	2244	nEN-late	nEN-late	H_nEN-late
S45.C8	H_Sci	21.5	975363	2378	nEN-late	nEN-late	H_nEN-late
S45.E9	H_Sci	21.5	970472	2283	nEN-late	nEN-late	H_nEN-late
S45.G9	H_Sci	21.5	979513	2473	nEN-late	nEN-late	H_nEN-late
S45.A11	H_Sci	21.5	980783	2178	nEN-late	nEN-late	H_nEN-late
S45.E11	H_Sci	21.5	973970	2423	nEN-late	nEN-late	H_nEN-late
S46.B1	H_Sci	21.5	972058	2577	nEN-late	nEN-late	H_nEN-late
S46.E1	H_Sci	21.5	974360	2022	nEN-late	nEN-late	H_nEN-late
S46.G1	H_Sci	21.5	972832	1207	nEN-late	nEN-late	H_nEN-late
S46.F4	H_Sci	21.5	976353	1764	nEN-late	nEN-late	H_nEN-late
S46.B5	H_Sci	21.5	970154	2630	nEN-late	nEN-late	H_nEN-late
S46.D6	H_Sci	21.5	968824	2024	nEN-late	nEN-late	H_nEN-late
S46.D7	H_Sci	21.5	971033	2068	nEN-late	nEN-late	H_nEN-late
S46.D8	H_Sci	21.5	969793	1533	nEN-late	nEN-late	H_nEN-late
S46.B9	H_Sci	21.5	969241	2617	nEN-late	nEN-late	H_nEN-late
S46.B11	H_Sci	21.5	968092	1868	nEN-late	nEN-late	H_nEN-late
S46.F12	H_Sci	21.5	956713	1805	nEN-late	nEN-late	H_nEN-late
S47.F1	H_Sci	21.5	973824	1625	nEN-late	nEN-late	H_nEN-late
S47.D2	H_Sci	21.5	975274	2105	nEN-late	nEN-late	H_nEN-late
S47.H2	H_Sci	21.5	964890	2429	nEN-late	nEN-late	H_nEN-late
S47.B3	H_Sci	21.5	972822	2112	nEN-late	nEN-late	H_nEN-late
S47.F4	H_Sci	21.5	963865	2045	nEN-late	nEN-late	H_nEN-late
S47.A5	H_Sci	21.5	977184	1462	nEN-late	nEN-late	H_nEN-late
S47.F5	H_Sci	21.5	954627	1631	nEN-late	nEN-late	H_nEN-late
S47.G6	H_Sci	21.5	969671	2292	nEN-late	nEN-late	H_nEN-late
S47.E9	H_Sci	21.5	969312	2339	nEN-late	nEN-late	H_nEN-late
S47.B10	H_Sci	21.5	973305	2260	nEN-late	nEN-late	H_nEN-late
S47.C10	H_Sci	21.5	964263	2416	nEN-late	nEN-late	H_nEN-late
S47.B11	H_Sci	21.5	967060	1825	nEN-late	nEN-late	H_nEN-late
S47.C11	H_Sci	21.5	964742	2000	nEN-late	nEN-late	H_nEN-late
S47.F12	H_Sci	21.5	964421	2437	nEN-late	nEN-late	H_nEN-late
S47.G12	H_Sci	21.5	955681	2289	nEN-late	nEN-late	H_nEN-late
S52.C1	H_Sci	13	977743	2231	nEN-late	nEN-late	H_nEN-late
S52.D1	H_Sci	13	979384	1838	nEN-late	nEN-late	H_nEN-late
S52.D3	H_Sci	13	977551	2586	nEN-late	nEN-late	H_nEN-late
S52.E3	H_Sci	13	983554	2142	nEN-late	nEN-late	H_nEN-late
S53.H2	H_Sci	14.2	973059	2309	nEN-late	nEN-late	H_nEN-late
S53.F4	H_Sci	14.2	944718	1846	nEN-late	nEN-late	H_nEN-late
S53.E5	H_Sci	14.2	968030	2423	nEN-late	nEN-late	H_nEN-late
S53.A9	H_Sci	13.3	957095	1541	nEN-late	nEN-late	H_nEN-late
S53.F9	H_Sci	13.3	974796	1135	nEN-late	nEN-late	H_nEN-late
S55.E4	H_Sci	18.5	967571	2033	nEN-late	nEN-late	H_nEN-late
S55.F4	H_Sci	18.5	971720	2108	nEN-late	nEN-late	H_nEN-late
S55.B5	H_Sci	18.5	956225	1471	nEN-late	nEN-late	H_nEN-late
S56.B8	H_Sci	13	954716	2247	nEN-late	nEN-late	H_nEN-late
S57.F1	H_Sci	20	967777	2461	nEN-late	nEN-late	H_nEN-late
S57.C5	H_Sci	20	970750	2437	nEN-late	nEN-late	H_nEN-late
S81.D3	H_Sci	15	974566	1735	nEN-late	nEN-late	H_nEN-late
S81.C8	H_Sci	15	985745	1289	nEN-late	nEN-late	H_nEN-late
S81.B10	H_Sci	15	982590	1147	nEN-late	nEN-late	H_nEN-late
S81.D12	H_Sci	15	988060	1547	nEN-late	nEN-late	H_nEN-late
S81.F12	H_Sci	15	988316	1654	nEN-late	nEN-late	H_nEN-late
S85.A1	H_Sci	17.5	950967	2141	nEN-late	nEN-late	H_nEN-late
S85.E3	H_Sci	17.5	982020	1352	nEN-late	nEN-late	H_nEN-late
S85.G4	H_Sci	17.5	959747	2330	nEN-late	nEN-late	H_nEN-late
S85.E7	H_Sci	17.5	977859	2082	nEN-late	nEN-late	H_nEN-late
S85.A8	H_Sci	17.5	962630	1536	nEN-late	nEN-late	H_nEN-late
S85.C9	H_Sci	17.5	957627	2223	nEN-late	nEN-late	H_nEN-late
S85.D9	H_Sci	17.5	986550	2360	nEN-late	nEN-late	H_nEN-late
S85.A11	H_Sci	17.5	978718	1848	nEN-late	nEN-late	H_nEN-late
S85.B11	H_Sci	17.5	972891	2486	nEN-late	nEN-late	H_nEN-late
S85.B12	H_Sci	17.5	960690	2553	nEN-late	nEN-late	H_nEN-late
S86.D1	H_Sci	17.5	978011	2235	nEN-late	nEN-late	H_nEN-late
S86.F1	H_Sci	17.5	962769	1727	nEN-late	nEN-late	H_nEN-late
S86.C2	H_Sci	17.5	956821	2266	nEN-late	nEN-late	H_nEN-late
S86.F2	H_Sci	17.5	978019	1663	nEN-late	nEN-late	H_nEN-late
S86.B3	H_Sci	17.5	975569	2620	nEN-late	nEN-late	H_nEN-late
S86.C3	H_Sci	17.5	974534	2351	nEN-late	nEN-late	H_nEN-late
S86.G4	H_Sci	17.5	973362	2074	nEN-late	nEN-late	H_nEN-late
S86.A5	H_Sci	17.5	971976	2422	nEN-late	nEN-late	H_nEN-late
S86.H5	H_Sci	17.5	960421	2114	nEN-late	nEN-late	H_nEN-late
S86.A6	H_Sci	17.5	974417	2286	nEN-late	nEN-late	H_nEN-late
S86.C7	H_Sci	17.5	975999	1932	nEN-late	nEN-late	H_nEN-late
S86.E7	H_Sci	17.5	977309	2203	nEN-late	nEN-late	H_nEN-late
S86.F7	H_Sci	17.5	972234	2262	nEN-late	nEN-late	H_nEN-late
S86.H7	H_Sci	17.5	974793	2304	nEN-late	nEN-late	H_nEN-late
S86.A8	H_Sci	17.5	965786	2286	nEN-late	nEN-late	H_nEN-late
S86.F8	H_Sci	17.5	959891	1871	nEN-late	nEN-late	H_nEN-late
S86.E9	H_Sci	17.5	982668	1684	nEN-late	nEN-late	H_nEN-late
S86.G9	H_Sci	17.5	956142	1864	nEN-late	nEN-late	H_nEN-late
S86.D11	H_Sci	17.5	978222	1091	nEN-late	nEN-late	H_nEN-late
S86.H11	H_Sci	17.5	978737	2572	nEN-late	nEN-late	H_nEN-late
S87.D9	H_Sci	17.5	993970	1089	nEN-late	nEN-late	H_nEN-late
S88.B6	H_Sci	13	987503	1220	nEN-late	nEN-late	H_nEN-late
S91.B2	H_Sci	16	968160	1349	nEN-late	nEN-late	H_nEN-late
S91.G4	H_Sci	16	974775	2525	nEN-late	nEN-late	H_nEN-late
S91.A6	H_Sci	16	975726	2550	nEN-late	nEN-late	H_nEN-late
S91.E7	H_Sci	16	967747	1993	nEN-late	nEN-late	H_nEN-late
S92.B10	H_Sci	16.5	952480	1799	nEN-late	nEN-late	H_nEN-late
S92.H12	H_Sci	16.5	977552	1771	nEN-late	nEN-late	H_nEN-late
S94.B3	H_Sci	13	982763	2207	nEN-late	nEN-late	H_nEN-late
S94.C11	H_Sci	13	977666	2267	nEN-late	nEN-late	H_nEN-late
S95.B1	H_Sci	13	983278	1919	nEN-late	nEN-late	H_nEN-late
S95.E1	H_Sci	13	966686	2082	nEN-late	nEN-late	H_nEN-late
S95.G8	H_Sci	13	949383	1789	nEN-late	nEN-late	H_nEN-late
S95.E12	H_Sci	13	962921	2423	nEN-late	nEN-late	H_nEN-late
S96.E4	H_Sci	14	972691	2114	nEN-late	nEN-late	H_nEN-late
S96.F4	H_Sci	14	978502	2195	nEN-late	nEN-late	H_nEN-late
S96.B6	H_Sci	14	970178	2377	nEN-late	nEN-late	H_nEN-late
S96.C6	H_Sci	14	971182	2437	nEN-late	nEN-late	H_nEN-late
S96.G6	H_Sci	14	977367	2055	nEN-late	nEN-late	H_nEN-late
S96.D7	H_Sci	14	951015	2280	nEN-late	nEN-late	H_nEN-late
S96.A11	H_Sci	14	967656	1758	nEN-late	nEN-late	H_nEN-late
S103.A1	H_Sci	17	971611	1458	nEN-late	nEN-late	H_nEN-late
S103.A2	H_Sci	17	973725	3164	nEN-late	nEN-late	H_nEN-late
S103.A3	H_Sci	17	977746	2212	nEN-late	nEN-late	H_nEN-late
S103.D5	H_Sci	17	956324	1669	nEN-late	nEN-late	H_nEN-late
S103.H6	H_Sci	17	985925	2421	nEN-late	nEN-late	H_nEN-late
S103.D7	H_Sci	17	970266	2589	nEN-late	nEN-late	H_nEN-late
S103.G8	H_Sci	17	974995	2347	nEN-late	nEN-late	H_nEN-late
S103.A11	H_Sci	17	978145	2423	nEN-late	nEN-late	H_nEN-late
S103.C11	H_Sci	17	972810	2109	nEN-late	nEN-late	H_nEN-late
S103.C12	H_Sci	17	975867	2022	nEN-late	nEN-late	H_nEN-late
S103.E12	H_Sci	17	976605	2184	nEN-late	nEN-late	H_nEN-late
S113.D2	H_Sci	21.5	971879	1765	nEN-late	nEN-late	H_nEN-late
S113.C3	H_Sci	21.5	976886	3116	nEN-late	nEN-late	H_nEN-late
S113.B4	H_Sci	21.5	973386	2286	nEN-late	nEN-late	H_nEN-late
S113.D10	H_Sci	21.5	983496	1785	nEN-late	nEN-late	H_nEN-late
S113.C12	H_Sci	21.5	968609	1641	nEN-late	nEN-late	H_nEN-late
S131.A4	H_Sci	18	987624	1558	nEN-late	nEN-late	H_nEN-late
S140.C1	H_Sci	20	978613	1881	nEN-late	nEN-late	H_nEN-late
S140.F1	H_Sci	20	976057	1833	nEN-late	nEN-late	H_nEN-late
S140.G1	H_Sci	20	979412	2347	nEN-late	nEN-late	H_nEN-late
S140.H1	H_Sci	20	979409	1680	nEN-late	nEN-late	H_nEN-late
S140.A2	H_Sci	20	968316	3085	nEN-late	nEN-late	H_nEN-late
S140.D2	H_Sci	20	972619	2446	nEN-late	nEN-late	H_nEN-late
S140.G2	H_Sci	20	973659	2576	nEN-late	nEN-late	H_nEN-late
S140.H2	H_Sci	20	974402	2711	nEN-late	nEN-late	H_nEN-late
S140.D3	H_Sci	20	968450	2244	nEN-late	nEN-late	H_nEN-late
S140.F3	H_Sci	20	972546	2272	nEN-late	nEN-late	H_nEN-late
S140.G3	H_Sci	20	970083	2077	nEN-late	nEN-late	H_nEN-late
S140.D4	H_Sci	20	977554	2576	nEN-late	nEN-late	H_nEN-late
S140.F4	H_Sci	20	972717	2122	nEN-late	nEN-late	H_nEN-late
S140.A5	H_Sci	20	971592	3070	nEN-late	nEN-late	H_nEN-late
S140.C5	H_Sci	20	974313	2629	nEN-late	nEN-late	H_nEN-late
S140.E5	H_Sci	20	971165	2650	nEN-late	nEN-late	H_nEN-late
S140.H5	H_Sci	20	978905	2347	nEN-late	nEN-late	H_nEN-late
S140.D6	H_Sci	20	971072	2132	nEN-late	nEN-late	H_nEN-late
S140.A8	H_Sci	20	972402	2202	nEN-late	nEN-late	H_nEN-late
S140.C8	H_Sci	20	983257	2120	nEN-late	nEN-late	H_nEN-late
S140.E8	H_Sci	20	981906	2555	nEN-late	nEN-late	H_nEN-late
S140.F8	H_Sci	20	975471	1887	nEN-late	nEN-late	H_nEN-late
S140.G8	H_Sci	20	983182	2108	nEN-late	nEN-late	H_nEN-late
S140.H8	H_Sci	20	971999	1986	nEN-late	nEN-late	H_nEN-late
S140.A9	H_Sci	20	958388	2637	nEN-late	nEN-late	H_nEN-late
S140.G9	H_Sci	20	973724	2730	nEN-late	nEN-late	H_nEN-late
S140.C10	H_Sci	20	982392	2700	nEN-late	nEN-late	H_nEN-late
S140.F11	H_Sci	20	973741	2299	nEN-late	nEN-late	H_nEN-late
S140.G12	H_Sci	20	970160	2652	nEN-late	nEN-late	H_nEN-late
S177.A6	H_Sci	18	956247	1176	nEN-late	nEN-late	H_nEN-late
S189.B1	H_Sci	8	956767	2015	nEN-late	nEN-late	H_nEN-late
S189.F1	H_Sci	8	984162	3423	nEN-late	nEN-late	H_nEN-late
S189.G1	H_Sci	8	985471	2310	nEN-late	nEN-late	H_nEN-late
S189.B2	H_Sci	8	981776	2648	nEN-late	nEN-late	H_nEN-late
S189.E3	H_Sci	8	975431	2711	nEN-late	nEN-late	H_nEN-late
S189.F4	H_Sci	8	983300	2733	nEN-late	nEN-late	H_nEN-late
S189.H4	H_Sci	8	974630	1780	nEN-late	nEN-late	H_nEN-late
S189.F5	H_Sci	8	973651	1983	nEN-late	nEN-late	H_nEN-late
S189.C8	H_Sci	8	981710	2569	nEN-late	nEN-late	H_nEN-late
S189.B10	H_Sci	8	985060	1914	nEN-late	nEN-late	H_nEN-late
S189.F10	H_Sci	8	977598	1344	nEN-late	nEN-late	H_nEN-late
S189.C11	H_Sci	8	975137	2514	nEN-late	nEN-late	H_nEN-late
S190.E2	H_Sci	8	982216	2474	nEN-late	nEN-late	H_nEN-late
S190.F2	H_Sci	8	987071	1772	nEN-late	nEN-late	H_nEN-late
S190.A3	H_Sci	8	981086	1137	nEN-late	nEN-late	H_nEN-late
S190.E10	H_Sci	8	976860	1772	nEN-late	nEN-late	H_nEN-late
S190.D12	H_Sci	8	986834	1733	nEN-late	nEN-late	H_nEN-late
Hi_GW16_11.Hi_GW16_11	H_Sci	14	991132	2990	vRG	vRG	H_vRG
Hi_GW16_13.Hi_GW16_13	H_Sci	14	976233	4139	vRG	vRG	H_vRG
O2.D8	H_Sci	18.5	980690	1001	vRG	vRG	H_vRG
O4.E1	H_Sci	14	972841	2481	vRG	vRG	H_vRG
O4.E10	H_Sci	14	986198	1011	vRG	vRG	H_vRG
O8.C2	H_Sci	14.7	991027	2041	vRG	vRG	H_vRG
O10.D3	H_Sci	14.7	985978	3122	vRG	vRG	H_vRG
O10.G3	H_Sci	14.7	980458	2913	vRG	vRG	H_vRG
O10.A4	H_Sci	14.7	983188	2856	vRG	vRG	H_vRG
S1.G11	H_Sci	11	985097	2427	vRG	vRG	H_vRG
S2.G1	H_Sci	11	970790	3782	vRG	vRG	H_vRG
S2.A7	H_Sci	11	977202	2898	vRG	vRG	H_vRG
S2.G11	H_Sci	11	978188	3246	vRG	vRG	H_vRG
S3.C1	H_Sci	14.5	977817	1915	vRG	vRG	H_vRG
S3.E1	H_Sci	14.5	980287	1811	vRG	vRG	H_vRG
S3.C4	H_Sci	14.5	980107	2795	vRG	vRG	H_vRG
S3.F4	H_Sci	14.5	976368	1930	vRG	vRG	H_vRG
S3.D5	H_Sci	14.5	970647	2743	vRG	vRG	H_vRG
S3.E5	H_Sci	14.5	970322	2716	vRG	vRG	H_vRG
S3.D7	H_Sci	14.5	978091	2393	vRG	vRG	H_vRG
S3.E7	H_Sci	14.5	978489	2052	vRG	vRG	H_vRG
S3.E8	H_Sci	14.5	977123	3198	vRG	vRG	H_vRG
S3.C10	H_Sci	14.5	988492	2843	vRG	vRG	H_vRG
S16.E3	H_Sci	13	975134	2254	vRG	vRG	H_vRG
S16.D6	H_Sci	13	981575	3660	vRG	vRG	H_vRG
S16.D8	H_Sci	13	979530	3257	vRG	vRG	H_vRG
S16.E8	H_Sci	13	988594	2827	vRG	vRG	H_vRG
S19.B1	H_Sci	19	975871	2130	vRG	vRG	H_vRG
S20.G10	H_Sci	14.2	983710	2844	vRG	vRG	H_vRG
S21.E3	H_Sci	14.2	980581	3389	vRG	vRG	H_vRG
S21.F6	H_Sci	14.2	977789	2893	vRG	vRG	H_vRG
S22.C9	H_Sci	13.3	978790	2976	vRG	vRG	H_vRG
S23.B1	H_Sci	13.3	974337	1939	vRG	vRG	H_vRG
S23.E2	H_Sci	13.3	976311	2481	vRG	vRG	H_vRG
S23.B11	H_Sci	13.3	981742	3022	vRG	vRG	H_vRG
S23.D12	H_Sci	13.3	972101	2448	vRG	vRG	H_vRG
S23.H12	H_Sci	13.3	976746	2792	vRG	vRG	H_vRG
S24.E1	H_Sci	13.3	976585	2651	vRG	vRG	H_vRG
S24.F4	H_Sci	13.3	976736	2297	vRG	vRG	H_vRG
S24.B11	H_Sci	13.3	974473	3207	vRG	vRG	H_vRG
S24.E12	H_Sci	13.3	980191	3467	vRG	vRG	H_vRG
S27.H7	H_Sci	17.3	977703	3329	vRG	vRG	H_vRG
S28.B2	H_Sci	14.2	973918	2640	vRG	vRG	H_vRG
S36.F9	H_Sci	16.3	962695	3000	vRG	vRG	H_vRG
S36.A12	H_Sci	16.3	962374	3138	vRG	vRG	H_vRG
S37.E8	H_Sci	16.3	980466	4059	vRG	vRG	H_vRG
S38.D1	H_Sci	16.3	975505	3873	vRG	vRG	H_vRG
S38.E1	H_Sci	16.3	978506	4456	vRG	vRG	H_vRG
S38.A2	H_Sci	16.3	976528	2742	vRG	vRG	H_vRG
S38.F2	H_Sci	16.3	979843	3748	vRG	vRG	H_vRG
S38.D5	H_Sci	16.3	975461	2541	vRG	vRG	H_vRG
S41.A1	H_Sci	13.3	977337	3153	vRG	vRG	H_vRG
S41.A12	H_Sci	13.3	952168	1678	vRG	vRG	H_vRG
S45.D5	H_Sci	21.5	977306	2498	vRG	vRG	H_vRG
S46.E2	H_Sci	21.5	974018	3658	vRG	vRG	H_vRG
S50.B10	H_Sci	11	980516	2756	vRG	vRG	H_vRG
S50.A11	H_Sci	11	982241	3482	vRG	vRG	H_vRG
S50.F12	H_Sci	11	982564	3204	vRG	vRG	H_vRG
S51.C3	H_Sci	14.5	988200	2606	vRG	vRG	H_vRG
S51.H10	H_Sci	13	979032	3019	vRG	vRG	H_vRG
S53.A1	H_Sci	14.2	979233	2013	vRG	vRG	H_vRG
S53.D1	H_Sci	14.2	970580	1411	vRG	vRG	H_vRG
S53.F1	H_Sci	14.2	971697	2218	vRG	vRG	H_vRG
S53.D2	H_Sci	14.2	973463	2690	vRG	vRG	H_vRG
S53.D4	H_Sci	14.2	958363	2210	vRG	vRG	H_vRG
S53.C5	H_Sci	14.2	975252	3354	vRG	vRG	H_vRG
S53.A10	H_Sci	13.3	985700	2000	vRG	vRG	H_vRG
S53.D10	H_Sci	13.3	986960	3124	vRG	vRG	H_vRG
S55.F5	H_Sci	18.5	974530	3377	vRG	vRG	H_vRG
S56.B1	H_Sci	13	984009	2247	vRG	vRG	H_vRG
S56.A4	H_Sci	13	975942	3420	vRG	vRG	H_vRG
S56.G10	H_Sci	13	976783	3526	vRG	vRG	H_vRG
S57.A3	H_Sci	20	946770	2689	vRG	vRG	H_vRG
S82.C4	H_Sci	11.5	987399	1558	vRG	vRG	H_vRG
S82.B6	H_Sci	11.5	979809	2838	vRG	vRG	H_vRG
S81.H1	H_Sci	15	975793	2416	vRG	vRG	H_vRG
S81.F2	H_Sci	15	957807	1209	vRG	vRG	H_vRG
S81.H12	H_Sci	15	990431	2052	vRG	vRG	H_vRG
S87.D12	H_Sci	17.5	974882	2569	vRG	vRG	H_vRG
S91.C3	H_Sci	16	979447	3149	vRG	vRG	H_vRG
S92.A1	H_Sci	16	976844	3343	vRG	vRG	H_vRG
S92.E1	H_Sci	16	978615	1951	vRG	vRG	H_vRG
S92.H1	H_Sci	16	983030	1954	vRG	vRG	H_vRG
S92.E5	H_Sci	16.5	968124	2585	vRG	vRG	H_vRG
S92.A9	H_Sci	16.5	973928	3146	vRG	vRG	H_vRG
S92.A10	H_Sci	16.5	978115	1383	vRG	vRG	H_vRG
S92.E10	H_Sci	16.5	965637	3127	vRG	vRG	H_vRG
S92.H11	H_Sci	16.5	976561	2785	vRG	vRG	H_vRG
S93.E10	H_Sci	13	976184	3347	vRG	vRG	H_vRG
S93.H12	H_Sci	7	980710	4339	vRG	vRG	H_vRG
S94.D4	H_Sci	13	975862	3557	vRG	vRG	H_vRG
S94.H12	H_Sci	13	976525	2569	vRG	vRG	H_vRG
S95.C5	H_Sci	13	971384	3997	vRG	vRG	H_vRG
S95.H5	H_Sci	13	974248	2854	vRG	vRG	H_vRG
S95.D11	H_Sci	13	951642	1910	vRG	vRG	H_vRG
S140.B2	H_Sci	20	985297	2297	vRG	vRG	H_vRG
S177.E7	H_Sci	18	973952	3110	vRG	vRG	H_vRG
Hi_GW16_3.Hi_GW16_3	H_Sci	14	985473	4934	RG-div2	RG-div2	H_RG-div
Hi_GW16_4.Hi_GW16_4	H_Sci	14	977080	5174	RG-div2	RG-div2	H_RG-div
Hi_GW16_15.Hi_GW16_15	H_Sci	14	977252	4714	RG-div2	RG-div2	H_RG-div
Hi_GW16_18.Hi_GW16_18	H_Sci	14	982402	6117	RG-div2	RG-div2	H_RG-div
O2.G1	H_Sci	18.5	987040	2435	RG-div2	RG-div2	H_RG-div
O2.H7	H_Sci	18.5	978516	3673	RG-div2	RG-div2	H_RG-div
O2.F8	H_Sci	18.5	974601	4924	RG-div2	RG-div2	H_RG-div
O2.G11	H_Sci	18.5	976272	5479	RG-div2	RG-div2	H_RG-div
O4.A1	H_Sci	14	977987	2555	RG-div2	RG-div2	H_RG-div
O4.A2	H_Sci	14	982952	3422	RG-div2	RG-div2	H_RG-div
O4.E4	H_Sci	14	980496	4103	RG-div2	RG-div2	H_RG-div
O4.G5	H_Sci	14	978177	3823	RG-div2	RG-div2	H_RG-div
O4.G8	H_Sci	14	976291	3660	RG-div2	RG-div2	H_RG-div
O4.H8	H_Sci	14	982350	3367	RG-div2	RG-div2	H_RG-div
O4.G9	H_Sci	14	982147	3421	RG-div2	RG-div2	H_RG-div
O4.H9	H_Sci	14	979214	4381	RG-div2	RG-div2	H_RG-div
O4.A12	H_Sci	14	979369	4789	RG-div2	RG-div2	H_RG-div
O8.F2	H_Sci	14.7	971116	3501	RG-div2	RG-div2	H_RG-div
O8.E3	H_Sci	14.7	982681	3731	RG-div2	RG-div2	H_RG-div
O8.F6	H_Sci	14.7	979578	4481	RG-div2	RG-div2	H_RG-div
O8.D7	H_Sci	14.7	970048	4106	RG-div2	RG-div2	H_RG-div
O8.E7	H_Sci	14.7	977888	4822	RG-div2	RG-div2	H_RG-div
O8.A9	H_Sci	14.7	979896	4023	RG-div2	RG-div2	H_RG-div
O9.A5	H_Sci	14.7	977146	2944	RG-div2	RG-div2	H_RG-div
O10.A1	H_Sci	14.7	982743	4684	RG-div2	RG-div2	H_RG-div
O10.C4	H_Sci	14.7	981850	3610	RG-div2	RG-div2	H_RG-div
O12.A1	H_Sci	14	982354	3265	RG-div2	RG-div2	H_RG-div
O12.B1	H_Sci	14	982599	3744	RG-div2	RG-div2	H_RG-div
O12.E1	H_Sci	14	960280	1882	RG-div2	RG-div2	H_RG-div
O12.G2	H_Sci	14	978228	5022	RG-div2	RG-div2	H_RG-div
O12.H2	H_Sci	14	981281	4771	RG-div2	RG-div2	H_RG-div
O12.E12	H_Sci	14.7	980847	4078	RG-div2	RG-div2	H_RG-div
S1.B3	H_Sci	11	974506	4764	RG-div2	RG-div2	H_RG-div
S2.D3	H_Sci	11	980737	3794	RG-div2	RG-div2	H_RG-div
S2.D4	H_Sci	11	979015	3106	RG-div2	RG-div2	H_RG-div
S2.H4	H_Sci	11	977367	2968	RG-div2	RG-div2	H_RG-div
S2.C5	H_Sci	11	978864	4713	RG-div2	RG-div2	H_RG-div
S2.G6	H_Sci	11	984791	2767	RG-div2	RG-div2	H_RG-div
S2.A8	H_Sci	11	971713	2794	RG-div2	RG-div2	H_RG-div
S2.A10	H_Sci	11	978008	3769	RG-div2	RG-div2	H_RG-div
S3.D3	H_Sci	14.5	972191	3331	RG-div2	RG-div2	H_RG-div
S3.C6	H_Sci	14.5	979735	2955	RG-div2	RG-div2	H_RG-div
S20.G11	H_Sci	14.2	975139	3484	RG-div2	RG-div2	H_RG-div
S22.B7	H_Sci	13.3	982767	3703	RG-div2	RG-div2	H_RG-div
S22.G7	H_Sci	13.3	983408	2511	RG-div2	RG-div2	H_RG-div
S23.D1	H_Sci	13.3	980116	3912	RG-div2	RG-div2	H_RG-div
S23.F1	H_Sci	13.3	978789	3425	RG-div2	RG-div2	H_RG-div
S23.B4	H_Sci	13.3	973745	3111	RG-div2	RG-div2	H_RG-div
S23.E4	H_Sci	13.3	978973	4011	RG-div2	RG-div2	H_RG-div
S23.H4	H_Sci	13.3	978060	3924	RG-div2	RG-div2	H_RG-div
S23.A5	H_Sci	13.3	975769	3120	RG-div2	RG-div2	H_RG-div
S23.C7	H_Sci	13.3	979154	3859	RG-div2	RG-div2	H_RG-div
S23.E9	H_Sci	13.3	978965	3331	RG-div2	RG-div2	H_RG-div
S23.F9	H_Sci	13.3	980612	4003	RG-div2	RG-div2	H_RG-div
S24.A6	H_Sci	13.3	978909	3502	RG-div2	RG-div2	H_RG-div
S24.G7	H_Sci	13.3	985073	3153	RG-div2	RG-div2	H_RG-div
S27.C1	H_Sci	17.3	972804	2838	RG-div2	RG-div2	H_RG-div
S27.H11	H_Sci	17.3	983187	3623	RG-div2	RG-div2	H_RG-div
S36.H8	H_Sci	16.3	971322	7911	RG-div2	RG-div2	H_RG-div
S36.C9	H_Sci	16.3	970799	3684	RG-div2	RG-div2	H_RG-div
S36.H9	H_Sci	16.3	969693	3392	RG-div2	RG-div2	H_RG-div
S36.B11	H_Sci	16.3	976044	7168	RG-div2	RG-div2	H_RG-div
S37.C1	H_Sci	16.3	982818	1042	RG-div2	RG-div2	H_RG-div
S37.G2	H_Sci	16.3	971005	4882	RG-div2	RG-div2	H_RG-div
S37.G4	H_Sci	16.3	976387	3513	RG-div2	RG-div2	H_RG-div
S37.E7	H_Sci	16.3	977796	3851	RG-div2	RG-div2	H_RG-div
S37.B11	H_Sci	16.3	976792	4761	RG-div2	RG-div2	H_RG-div
S37.B12	H_Sci	16.3	978254	5051	RG-div2	RG-div2	H_RG-div
S37.C12	H_Sci	16.3	975691	5356	RG-div2	RG-div2	H_RG-div
S38.B2	H_Sci	16.3	975639	4180	RG-div2	RG-div2	H_RG-div
S38.A5	H_Sci	16.3	982896	3965	RG-div2	RG-div2	H_RG-div
S38.F6	H_Sci	16.3	980372	4136	RG-div2	RG-div2	H_RG-div
S38.B7	H_Sci	16.3	973774	5042	RG-div2	RG-div2	H_RG-div
S38.B9	H_Sci	16.3	974165	5626	RG-div2	RG-div2	H_RG-div
S42.H1	H_Sci	13.3	976531	3712	RG-div2	RG-div2	H_RG-div
S42.F2	H_Sci	13.3	975420	3734	RG-div2	RG-div2	H_RG-div
S45.C5	H_Sci	21.5	978478	3906	RG-div2	RG-div2	H_RG-div
S45.B10	H_Sci	21.5	985693	3410	RG-div2	RG-div2	H_RG-div
S46.A12	H_Sci	21.5	981559	4333	RG-div2	RG-div2	H_RG-div
S50.B11	H_Sci	11	984017	4045	RG-div2	RG-div2	H_RG-div
S50.G11	H_Sci	11	984005	3828	RG-div2	RG-div2	H_RG-div
S50.H11	H_Sci	11	987251	3222	RG-div2	RG-div2	H_RG-div
S50.B12	H_Sci	11	978546	4829	RG-div2	RG-div2	H_RG-div
S51.F10	H_Sci	13	976894	4067	RG-div2	RG-div2	H_RG-div
S51.H12	H_Sci	13	983721	4695	RG-div2	RG-div2	H_RG-div
S53.G9	H_Sci	13.3	976546	4225	RG-div2	RG-div2	H_RG-div
S55.B2	H_Sci	13.3	973780	2563	RG-div2	RG-div2	H_RG-div
S56.H6	H_Sci	13	973903	4054	RG-div2	RG-div2	H_RG-div
S56.A7	H_Sci	13	974521	3862	RG-div2	RG-div2	H_RG-div
S56.D10	H_Sci	13	972862	4145	RG-div2	RG-div2	H_RG-div
S82.D1	H_Sci	11.5	976722	2710	RG-div2	RG-div2	H_RG-div
S82.C5	H_Sci	11.5	982384	3897	RG-div2	RG-div2	H_RG-div
S82.C7	H_Sci	11.5	983956	3746	RG-div2	RG-div2	H_RG-div
S82.H10	H_Sci	11.5	973981	2790	RG-div2	RG-div2	H_RG-div
S82.D12	H_Sci	11.5	981427	3565	RG-div2	RG-div2	H_RG-div
S82.G12	H_Sci	11.5	978503	3592	RG-div2	RG-div2	H_RG-div
S82.H12	H_Sci	11.5	980585	2941	RG-div2	RG-div2	H_RG-div
S83.F2	H_Sci	11.5	981932	3093	RG-div2	RG-div2	H_RG-div
S83.A3	H_Sci	11.5	982160	3750	RG-div2	RG-div2	H_RG-div
S83.E3	H_Sci	11.5	981750	4165	RG-div2	RG-div2	H_RG-div
S83.E4	H_Sci	11.5	981746	3653	RG-div2	RG-div2	H_RG-div
S83.H4	H_Sci	11.5	975060	4536	RG-div2	RG-div2	H_RG-div
S83.D5	H_Sci	11.5	979168	3962	RG-div2	RG-div2	H_RG-div
S83.B6	H_Sci	11.5	982013	3556	RG-div2	RG-div2	H_RG-div
S83.D8	H_Sci	11.5	981978	3834	RG-div2	RG-div2	H_RG-div
S83.E8	H_Sci	11.5	979259	4443	RG-div2	RG-div2	H_RG-div
S83.G8	H_Sci	11.5	985554	3536	RG-div2	RG-div2	H_RG-div
S84.H10	H_Sci	13	983116	4257	RG-div2	RG-div2	H_RG-div
S81.E11	H_Sci	15	985192	3952	RG-div2	RG-div2	H_RG-div
S81.B12	H_Sci	15	983308	5306	RG-div2	RG-div2	H_RG-div
S91.H3	H_Sci	16	978879	4371	RG-div2	RG-div2	H_RG-div
S91.B5	H_Sci	16	984472	4027	RG-div2	RG-div2	H_RG-div
S92.G2	H_Sci	16	977167	4411	RG-div2	RG-div2	H_RG-div
S92.A5	H_Sci	16.5	974260	3191	RG-div2	RG-div2	H_RG-div
S94.A3	H_Sci	13	976220	3557	RG-div2	RG-div2	H_RG-div
S94.B7	H_Sci	13	970589	3862	RG-div2	RG-div2	H_RG-div
S95.B3	H_Sci	13	979362	4180	RG-div2	RG-div2	H_RG-div
S96.F10	H_Sci	14	973012	3995	RG-div2	RG-div2	H_RG-div
S103.B3	H_Sci	17	980391	5912	RG-div2	RG-div2	H_RG-div
S140.B3	H_Sci	20	978340	4745	RG-div2	RG-div2	H_RG-div
S177.G1	H_Sci	18	969184	3061	RG-div2	RG-div2	H_RG-div
S177.C7	H_Sci	18	984343	4790	RG-div2	RG-div2	H_RG-div
S177.A8	H_Sci	18	971354	2469	RG-div2	RG-div2	H_RG-div
S177.A9	H_Sci	18	970198	3463	RG-div2	RG-div2	H_RG-div
Hi_GW16_10.Hi_GW16_10	H_Sci	14	979632	3639	IN-CTX-CGE1	IN-CTX-CGE1	H_IN-CTX-CGE
Hi_GW16_2.Hi_GW16_2	H_Sci	14	967604	3521	IN-CTX-CGE1	IN-CTX-CGE1	H_IN-CTX-CGE
Hi_GW16_26.Hi_GW16_26	H_Sci	14	978043	3137	IN-CTX-CGE1	IN-CTX-CGE1	H_IN-CTX-CGE
O9.B3	H_Sci	14.7	979152	1797	IN-CTX-CGE1	IN-CTX-CGE1	H_IN-CTX-CGE
O9.H3	H_Sci	14.7	981070	1563	IN-CTX-CGE1	IN-CTX-CGE1	H_IN-CTX-CGE
O9.G4	H_Sci	14.7	963790	1297	IN-CTX-CGE1	IN-CTX-CGE1	H_IN-CTX-CGE
O9.C5	H_Sci	14.7	978401	2367	IN-CTX-CGE1	IN-CTX-CGE1	H_IN-CTX-CGE
O9.E8	H_Sci	14.7	969408	1237	IN-CTX-CGE1	IN-CTX-CGE1	H_IN-CTX-CGE
O9.A9	H_Sci	14.7	980690	2953	IN-CTX-CGE1	IN-CTX-CGE1	H_IN-CTX-CGE
O9.C10	H_Sci	14.7	973731	2327	IN-CTX-CGE1	IN-CTX-CGE1	H_IN-CTX-CGE
O9.B11	H_Sci	14.7	983928	2132	IN-CTX-CGE1	IN-CTX-CGE1	H_IN-CTX-CGE
O9.E11	H_Sci	14.7	967303	1420	IN-CTX-CGE1	IN-CTX-CGE1	H_IN-CTX-CGE
O9.F12	H_Sci	14.7	974099	2226	IN-CTX-CGE1	IN-CTX-CGE1	H_IN-CTX-CGE
O9.G12	H_Sci	14.7	974185	2112	IN-CTX-CGE1	IN-CTX-CGE1	H_IN-CTX-CGE
O10.G4	H_Sci	14.7	977087	1669	IN-CTX-CGE1	IN-CTX-CGE1	H_IN-CTX-CGE
O10.H7	H_Sci	14.7	980322	1465	IN-CTX-CGE1	IN-CTX-CGE1	H_IN-CTX-CGE
O10.C11	H_Sci	14.7	972251	2553	IN-CTX-CGE1	IN-CTX-CGE1	H_IN-CTX-CGE
O12.D3	H_Sci	14	974655	1482	IN-CTX-CGE1	IN-CTX-CGE1	H_IN-CTX-CGE
O12.D4	H_Sci	14	979092	1656	IN-CTX-CGE1	IN-CTX-CGE1	H_IN-CTX-CGE
O12.H4	H_Sci	14	973290	2185	IN-CTX-CGE1	IN-CTX-CGE1	H_IN-CTX-CGE
O12.A5	H_Sci	14	968898	1412	IN-CTX-CGE1	IN-CTX-CGE1	H_IN-CTX-CGE
O12.C5	H_Sci	14	967400	1892	IN-CTX-CGE1	IN-CTX-CGE1	H_IN-CTX-CGE
O12.C6	H_Sci	14	981776	1494	IN-CTX-CGE1	IN-CTX-CGE1	H_IN-CTX-CGE
O12.H8	H_Sci	22	976098	2687	IN-CTX-CGE1	IN-CTX-CGE1	H_IN-CTX-CGE
O12.B9	H_Sci	22	971014	2411	IN-CTX-CGE1	IN-CTX-CGE1	H_IN-CTX-CGE
O12.D9	H_Sci	22	981599	2065	IN-CTX-CGE1	IN-CTX-CGE1	H_IN-CTX-CGE
O12.E10	H_Sci	22	976199	2773	IN-CTX-CGE1	IN-CTX-CGE1	H_IN-CTX-CGE
S1.H7	H_Sci	11	977937	2271	IN-CTX-CGE1	IN-CTX-CGE1	H_IN-CTX-CGE
S1.A8	H_Sci	11	975858	1857	IN-CTX-CGE1	IN-CTX-CGE1	H_IN-CTX-CGE
S3.C5	H_Sci	14.5	979073	1267	IN-CTX-CGE1	IN-CTX-CGE1	H_IN-CTX-CGE
S15.E9	H_Sci	13	979000	2050	IN-CTX-CGE1	IN-CTX-CGE1	H_IN-CTX-CGE
S15.G11	H_Sci	13	976695	1911	IN-CTX-CGE1	IN-CTX-CGE1	H_IN-CTX-CGE
S15.B12	H_Sci	13	977785	2086	IN-CTX-CGE1	IN-CTX-CGE1	H_IN-CTX-CGE
S15.G12	H_Sci	13	975736	1641	IN-CTX-CGE1	IN-CTX-CGE1	H_IN-CTX-CGE
S16.B2	H_Sci	13	984385	1609	IN-CTX-CGE1	IN-CTX-CGE1	H_IN-CTX-CGE
S16.E2	H_Sci	13	976714	2070	IN-CTX-CGE1	IN-CTX-CGE1	H_IN-CTX-CGE
S16.A3	H_Sci	13	978200	2238	IN-CTX-CGE1	IN-CTX-CGE1	H_IN-CTX-CGE
S17.E10	H_Sci	19	971373	1914	IN-CTX-CGE1	IN-CTX-CGE1	H_IN-CTX-CGE
S17.F10	H_Sci	19	978017	2696	IN-CTX-CGE1	IN-CTX-CGE1	H_IN-CTX-CGE
S17.F11	H_Sci	19	974261	2321	IN-CTX-CGE1	IN-CTX-CGE1	H_IN-CTX-CGE
S17.C12	H_Sci	19	978909	2276	IN-CTX-CGE1	IN-CTX-CGE1	H_IN-CTX-CGE
S19.D2	H_Sci	19	975470	2834	IN-CTX-CGE1	IN-CTX-CGE1	H_IN-CTX-CGE
S19.C3	H_Sci	19	973900	2021	IN-CTX-CGE1	IN-CTX-CGE1	H_IN-CTX-CGE
S19.F3	H_Sci	19	975169	1838	IN-CTX-CGE1	IN-CTX-CGE1	H_IN-CTX-CGE
S19.H11	H_Sci	14.2	975543	1718	IN-CTX-CGE1	IN-CTX-CGE1	H_IN-CTX-CGE
S20.C8	H_Sci	14.2	974563	1474	IN-CTX-CGE1	IN-CTX-CGE1	H_IN-CTX-CGE
S20.E12	H_Sci	14.2	971470	2286	IN-CTX-CGE1	IN-CTX-CGE1	H_IN-CTX-CGE
S22.B12	H_Sci	19	973292	1676	IN-CTX-CGE1	IN-CTX-CGE1	H_IN-CTX-CGE
S26.G2	H_Sci	17.3	973009	2187	IN-CTX-CGE1	IN-CTX-CGE1	H_IN-CTX-CGE
S26.H4	H_Sci	17.3	968228	1507	IN-CTX-CGE1	IN-CTX-CGE1	H_IN-CTX-CGE
S26.A5	H_Sci	17.3	974948	1786	IN-CTX-CGE1	IN-CTX-CGE1	H_IN-CTX-CGE
S26.F5	H_Sci	17.3	975398	1678	IN-CTX-CGE1	IN-CTX-CGE1	H_IN-CTX-CGE
S26.E6	H_Sci	17.3	970691	1852	IN-CTX-CGE1	IN-CTX-CGE1	H_IN-CTX-CGE
S26.A9	H_Sci	17.3	979479	2179	IN-CTX-CGE1	IN-CTX-CGE1	H_IN-CTX-CGE
S26.E9	H_Sci	17.3	970660	1705	IN-CTX-CGE1	IN-CTX-CGE1	H_IN-CTX-CGE
S26.F12	H_Sci	17.3	972197	1849	IN-CTX-CGE1	IN-CTX-CGE1	H_IN-CTX-CGE
S26.H12	H_Sci	17.3	980130	2133	IN-CTX-CGE1	IN-CTX-CGE1	H_IN-CTX-CGE
S27.H6	H_Sci	17.3	980520	1743	IN-CTX-CGE1	IN-CTX-CGE1	H_IN-CTX-CGE
S41.B2	H_Sci	13.3	982617	1972	IN-CTX-CGE1	IN-CTX-CGE1	H_IN-CTX-CGE
S41.C2	H_Sci	13.3	977113	1579	IN-CTX-CGE1	IN-CTX-CGE1	H_IN-CTX-CGE
S44.A6	H_Sci	17.5	976612	2101	IN-CTX-CGE1	IN-CTX-CGE1	H_IN-CTX-CGE
S45.G6	H_Sci	21.5	974449	2046	IN-CTX-CGE1	IN-CTX-CGE1	H_IN-CTX-CGE
S45.H8	H_Sci	21.5	971524	2350	IN-CTX-CGE1	IN-CTX-CGE1	H_IN-CTX-CGE
S45.F11	H_Sci	21.5	967470	1476	IN-CTX-CGE1	IN-CTX-CGE1	H_IN-CTX-CGE
S46.B3	H_Sci	21.5	975735	1690	IN-CTX-CGE1	IN-CTX-CGE1	H_IN-CTX-CGE
S46.F5	H_Sci	21.5	984321	2092	IN-CTX-CGE1	IN-CTX-CGE1	H_IN-CTX-CGE
S47.A7	H_Sci	21.5	973008	2348	IN-CTX-CGE1	IN-CTX-CGE1	H_IN-CTX-CGE
S47.D7	H_Sci	21.5	974478	1879	IN-CTX-CGE1	IN-CTX-CGE1	H_IN-CTX-CGE
S47.C8	H_Sci	21.5	969780	1286	IN-CTX-CGE1	IN-CTX-CGE1	H_IN-CTX-CGE
S47.A10	H_Sci	21.5	980730	2349	IN-CTX-CGE1	IN-CTX-CGE1	H_IN-CTX-CGE
S50.A8	H_Sci	11	975648	2280	IN-CTX-CGE1	IN-CTX-CGE1	H_IN-CTX-CGE
S51.A8	H_Sci	13	975943	2159	IN-CTX-CGE1	IN-CTX-CGE1	H_IN-CTX-CGE
S51.F11	H_Sci	13	984879	2739	IN-CTX-CGE1	IN-CTX-CGE1	H_IN-CTX-CGE
S52.C5	H_Sci	13	980586	2683	IN-CTX-CGE1	IN-CTX-CGE1	H_IN-CTX-CGE
S52.E7	H_Sci	19	973834	2046	IN-CTX-CGE1	IN-CTX-CGE1	H_IN-CTX-CGE
S52.H7	H_Sci	19	981437	1906	IN-CTX-CGE1	IN-CTX-CGE1	H_IN-CTX-CGE
S52.G8	H_Sci	19	975170	2458	IN-CTX-CGE1	IN-CTX-CGE1	H_IN-CTX-CGE
S52.H8	H_Sci	19	972217	1547	IN-CTX-CGE1	IN-CTX-CGE1	H_IN-CTX-CGE
S52.A9	H_Sci	19	981968	1698	IN-CTX-CGE1	IN-CTX-CGE1	H_IN-CTX-CGE
S52.D9	H_Sci	19	975488	2594	IN-CTX-CGE1	IN-CTX-CGE1	H_IN-CTX-CGE
S52.G9	H_Sci	14.2	980777	2045	IN-CTX-CGE1	IN-CTX-CGE1	H_IN-CTX-CGE
S79.G7	H_Sci	19	987105	1463	IN-CTX-CGE1	IN-CTX-CGE1	H_IN-CTX-CGE
S81.A8	H_Sci	15	974604	1777	IN-CTX-CGE1	IN-CTX-CGE1	H_IN-CTX-CGE
S85.A2	H_Sci	17.5	977297	2214	IN-CTX-CGE1	IN-CTX-CGE1	H_IN-CTX-CGE
S85.G6	H_Sci	17.5	977744	1685	IN-CTX-CGE1	IN-CTX-CGE1	H_IN-CTX-CGE
S85.C12	H_Sci	17.5	978961	2324	IN-CTX-CGE1	IN-CTX-CGE1	H_IN-CTX-CGE
S87.E2	H_Sci	17.5	967966	1456	IN-CTX-CGE1	IN-CTX-CGE1	H_IN-CTX-CGE
S87.H5	H_Sci	17.5	973592	1652	IN-CTX-CGE1	IN-CTX-CGE1	H_IN-CTX-CGE
S87.F8	H_Sci	17.5	975510	1985	IN-CTX-CGE1	IN-CTX-CGE1	H_IN-CTX-CGE
S88.D2	H_Sci	13	977562	1590	IN-CTX-CGE1	IN-CTX-CGE1	H_IN-CTX-CGE
S88.B4	H_Sci	13	981564	2127	IN-CTX-CGE1	IN-CTX-CGE1	H_IN-CTX-CGE
S88.A7	H_Sci	13	980330	1933	IN-CTX-CGE1	IN-CTX-CGE1	H_IN-CTX-CGE
S88.H11	H_Sci	13	984416	2041	IN-CTX-CGE1	IN-CTX-CGE1	H_IN-CTX-CGE
S91.B6	H_Sci	16	983912	1183	IN-CTX-CGE1	IN-CTX-CGE1	H_IN-CTX-CGE
S91.F7	H_Sci	16	977857	2066	IN-CTX-CGE1	IN-CTX-CGE1	H_IN-CTX-CGE
S91.C9	H_Sci	16	973189	1971	IN-CTX-CGE1	IN-CTX-CGE1	H_IN-CTX-CGE
S91.F9	H_Sci	16	970431	1178	IN-CTX-CGE1	IN-CTX-CGE1	H_IN-CTX-CGE
S91.D11	H_Sci	16	971461	1730	IN-CTX-CGE1	IN-CTX-CGE1	H_IN-CTX-CGE
S91.H12	H_Sci	16	970518	1828	IN-CTX-CGE1	IN-CTX-CGE1	H_IN-CTX-CGE
S92.F2	H_Sci	16	972797	2195	IN-CTX-CGE1	IN-CTX-CGE1	H_IN-CTX-CGE
S92.H2	H_Sci	16	976553	2249	IN-CTX-CGE1	IN-CTX-CGE1	H_IN-CTX-CGE
S92.D3	H_Sci	16	980860	2196	IN-CTX-CGE1	IN-CTX-CGE1	H_IN-CTX-CGE
S92.F3	H_Sci	16	970558	2224	IN-CTX-CGE1	IN-CTX-CGE1	H_IN-CTX-CGE
S92.C8	H_Sci	16.5	949125	1227	IN-CTX-CGE1	IN-CTX-CGE1	H_IN-CTX-CGE
S92.H9	H_Sci	16.5	967405	1211	IN-CTX-CGE1	IN-CTX-CGE1	H_IN-CTX-CGE
S92.E11	H_Sci	16.5	970732	1635	IN-CTX-CGE1	IN-CTX-CGE1	H_IN-CTX-CGE
S95.A8	H_Sci	13	967561	1753	IN-CTX-CGE1	IN-CTX-CGE1	H_IN-CTX-CGE
S95.D8	H_Sci	13	964325	1576	IN-CTX-CGE1	IN-CTX-CGE1	H_IN-CTX-CGE
S95.F9	H_Sci	13	977111	2331	IN-CTX-CGE1	IN-CTX-CGE1	H_IN-CTX-CGE
S96.G2	H_Sci	14	965263	1621	IN-CTX-CGE1	IN-CTX-CGE1	H_IN-CTX-CGE
S96.E7	H_Sci	14	981431	2126	IN-CTX-CGE1	IN-CTX-CGE1	H_IN-CTX-CGE
S96.E9	H_Sci	14	975847	2519	IN-CTX-CGE1	IN-CTX-CGE1	H_IN-CTX-CGE
S103.F1	H_Sci	17	978649	1287	IN-CTX-CGE1	IN-CTX-CGE1	H_IN-CTX-CGE
S103.H1	H_Sci	17	983673	1985	IN-CTX-CGE1	IN-CTX-CGE1	H_IN-CTX-CGE
S103.E2	H_Sci	17	977170	2322	IN-CTX-CGE1	IN-CTX-CGE1	H_IN-CTX-CGE
S103.C3	H_Sci	17	975597	4739	IN-CTX-CGE1	IN-CTX-CGE1	H_IN-CTX-CGE
S103.F3	H_Sci	17	979895	1559	IN-CTX-CGE1	IN-CTX-CGE1	H_IN-CTX-CGE
S103.G3	H_Sci	17	976184	1806	IN-CTX-CGE1	IN-CTX-CGE1	H_IN-CTX-CGE
S103.H3	H_Sci	17	985072	1708	IN-CTX-CGE1	IN-CTX-CGE1	H_IN-CTX-CGE
S103.A4	H_Sci	17	982290	1575	IN-CTX-CGE1	IN-CTX-CGE1	H_IN-CTX-CGE
S103.E4	H_Sci	17	969249	1565	IN-CTX-CGE1	IN-CTX-CGE1	H_IN-CTX-CGE
S103.H4	H_Sci	17	986048	1891	IN-CTX-CGE1	IN-CTX-CGE1	H_IN-CTX-CGE
S103.E5	H_Sci	17	978804	1880	IN-CTX-CGE1	IN-CTX-CGE1	H_IN-CTX-CGE
S103.H5	H_Sci	17	976120	2091	IN-CTX-CGE1	IN-CTX-CGE1	H_IN-CTX-CGE
S103.A6	H_Sci	17	980141	1673	IN-CTX-CGE1	IN-CTX-CGE1	H_IN-CTX-CGE
S103.D6	H_Sci	17	968116	1560	IN-CTX-CGE1	IN-CTX-CGE1	H_IN-CTX-CGE
S103.F6	H_Sci	17	978314	1740	IN-CTX-CGE1	IN-CTX-CGE1	H_IN-CTX-CGE
S103.B7	H_Sci	17	965926	1562	IN-CTX-CGE1	IN-CTX-CGE1	H_IN-CTX-CGE
S103.B8	H_Sci	17	971071	1953	IN-CTX-CGE1	IN-CTX-CGE1	H_IN-CTX-CGE
S103.D8	H_Sci	17	977632	1355	IN-CTX-CGE1	IN-CTX-CGE1	H_IN-CTX-CGE
S103.E8	H_Sci	17	976435	1767	IN-CTX-CGE1	IN-CTX-CGE1	H_IN-CTX-CGE
S103.B9	H_Sci	17	974517	2087	IN-CTX-CGE1	IN-CTX-CGE1	H_IN-CTX-CGE
S103.B10	H_Sci	17	978483	2197	IN-CTX-CGE1	IN-CTX-CGE1	H_IN-CTX-CGE
S103.D10	H_Sci	17	973217	2080	IN-CTX-CGE1	IN-CTX-CGE1	H_IN-CTX-CGE
S103.F10	H_Sci	17	978454	2047	IN-CTX-CGE1	IN-CTX-CGE1	H_IN-CTX-CGE
S103.H10	H_Sci	17	970512	1772	IN-CTX-CGE1	IN-CTX-CGE1	H_IN-CTX-CGE
S103.H11	H_Sci	17	990661	2216	IN-CTX-CGE1	IN-CTX-CGE1	H_IN-CTX-CGE
S103.F12	H_Sci	17	985183	1694	IN-CTX-CGE1	IN-CTX-CGE1	H_IN-CTX-CGE
S113.A4	H_Sci	21.5	986278	1379	IN-CTX-CGE1	IN-CTX-CGE1	H_IN-CTX-CGE
S113.C4	H_Sci	21.5	980073	1640	IN-CTX-CGE1	IN-CTX-CGE1	H_IN-CTX-CGE
S113.E12	H_Sci	21.5	974786	1527	IN-CTX-CGE1	IN-CTX-CGE1	H_IN-CTX-CGE
S114.C9	H_Sci	22	975566	2470	IN-CTX-CGE1	IN-CTX-CGE1	H_IN-CTX-CGE
S114.E11	H_Sci	22	957699	1519	IN-CTX-CGE1	IN-CTX-CGE1	H_IN-CTX-CGE
S115.E5	H_Sci	22	972547	1784	IN-CTX-CGE1	IN-CTX-CGE1	H_IN-CTX-CGE
S116.B4	H_Sci	22	983255	2135	IN-CTX-CGE1	IN-CTX-CGE1	H_IN-CTX-CGE
S140.B4	H_Sci	20	982653	1652	IN-CTX-CGE1	IN-CTX-CGE1	H_IN-CTX-CGE
S140.F12	H_Sci	20	971483	1948	IN-CTX-CGE1	IN-CTX-CGE1	H_IN-CTX-CGE
S162.G12	H_Sci	23	947333	2267	IN-CTX-CGE1	IN-CTX-CGE1	H_IN-CTX-CGE
Hi_GW16_9.Hi_GW16_9	H_Sci	14	968616	3004	IN-CTX-CGE2	IN-CTX-CGE2	H_IN-CTX-CGE
O1.F5	H_Sci	18.5	978161	2479	IN-CTX-CGE2	IN-CTX-CGE2	H_IN-CTX-CGE
O1.A10	H_Sci	18.5	980529	2327	IN-CTX-CGE2	IN-CTX-CGE2	H_IN-CTX-CGE
O2.G5	H_Sci	18.5	979878	1973	IN-CTX-CGE2	IN-CTX-CGE2	H_IN-CTX-CGE
O2.B11	H_Sci	18.5	979248	1951	IN-CTX-CGE2	IN-CTX-CGE2	H_IN-CTX-CGE
O4.D3	H_Sci	14	969078	1925	IN-CTX-CGE2	IN-CTX-CGE2	H_IN-CTX-CGE
O4.F6	H_Sci	14	983017	2353	IN-CTX-CGE2	IN-CTX-CGE2	H_IN-CTX-CGE
O9.D10	H_Sci	14.7	979018	1333	IN-CTX-CGE2	IN-CTX-CGE2	H_IN-CTX-CGE
O10.C2	H_Sci	14.7	980249	3067	IN-CTX-CGE2	IN-CTX-CGE2	H_IN-CTX-CGE
O10.E9	H_Sci	14.7	981387	2406	IN-CTX-CGE2	IN-CTX-CGE2	H_IN-CTX-CGE
O12.B3	H_Sci	14	978179	2004	IN-CTX-CGE2	IN-CTX-CGE2	H_IN-CTX-CGE
O12.C3	H_Sci	14	968138	2094	IN-CTX-CGE2	IN-CTX-CGE2	H_IN-CTX-CGE
O12.E4	H_Sci	14	975458	2403	IN-CTX-CGE2	IN-CTX-CGE2	H_IN-CTX-CGE
O12.B6	H_Sci	14	966725	2332	IN-CTX-CGE2	IN-CTX-CGE2	H_IN-CTX-CGE
O12.C8	H_Sci	22	973396	2605	IN-CTX-CGE2	IN-CTX-CGE2	H_IN-CTX-CGE
O12.E8	H_Sci	22	977583	2448	IN-CTX-CGE2	IN-CTX-CGE2	H_IN-CTX-CGE
O12.C10	H_Sci	22	983615	3004	IN-CTX-CGE2	IN-CTX-CGE2	H_IN-CTX-CGE
S3.B5	H_Sci	14.5	975848	1813	IN-CTX-CGE2	IN-CTX-CGE2	H_IN-CTX-CGE
S14.F11	H_Sci	19	973270	2222	IN-CTX-CGE2	IN-CTX-CGE2	H_IN-CTX-CGE
S15.F12	H_Sci	13	977042	2319	IN-CTX-CGE2	IN-CTX-CGE2	H_IN-CTX-CGE
S16.E4	H_Sci	13	977487	2271	IN-CTX-CGE2	IN-CTX-CGE2	H_IN-CTX-CGE
S16.E7	H_Sci	13	986372	2473	IN-CTX-CGE2	IN-CTX-CGE2	H_IN-CTX-CGE
S19.D3	H_Sci	19	968516	2270	IN-CTX-CGE2	IN-CTX-CGE2	H_IN-CTX-CGE
S19.A9	H_Sci	14.2	981131	2157	IN-CTX-CGE2	IN-CTX-CGE2	H_IN-CTX-CGE
S20.D10	H_Sci	14.2	984104	1637	IN-CTX-CGE2	IN-CTX-CGE2	H_IN-CTX-CGE
S21.H8	H_Sci	14.2	973196	1923	IN-CTX-CGE2	IN-CTX-CGE2	H_IN-CTX-CGE
S22.F8	H_Sci	13.3	975766	1684	IN-CTX-CGE2	IN-CTX-CGE2	H_IN-CTX-CGE
S22.E10	H_Sci	19	967368	1694	IN-CTX-CGE2	IN-CTX-CGE2	H_IN-CTX-CGE
S22.E11	H_Sci	19	966315	1632	IN-CTX-CGE2	IN-CTX-CGE2	H_IN-CTX-CGE
S23.G9	H_Sci	13.3	970642	2308	IN-CTX-CGE2	IN-CTX-CGE2	H_IN-CTX-CGE
S24.E6	H_Sci	13.3	981054	3381	IN-CTX-CGE2	IN-CTX-CGE2	H_IN-CTX-CGE
S24.E11	H_Sci	13.3	973523	2869	IN-CTX-CGE2	IN-CTX-CGE2	H_IN-CTX-CGE
S24.C12	H_Sci	13.3	978906	3174	IN-CTX-CGE2	IN-CTX-CGE2	H_IN-CTX-CGE
S26.D4	H_Sci	17.3	984819	1873	IN-CTX-CGE2	IN-CTX-CGE2	H_IN-CTX-CGE
S26.G4	H_Sci	17.3	967829	1944	IN-CTX-CGE2	IN-CTX-CGE2	H_IN-CTX-CGE
S26.B5	H_Sci	17.3	979290	2122	IN-CTX-CGE2	IN-CTX-CGE2	H_IN-CTX-CGE
S26.D6	H_Sci	17.3	972055	1221	IN-CTX-CGE2	IN-CTX-CGE2	H_IN-CTX-CGE
S26.D7	H_Sci	17.3	963733	1521	IN-CTX-CGE2	IN-CTX-CGE2	H_IN-CTX-CGE
S26.C11	H_Sci	17.3	985588	1717	IN-CTX-CGE2	IN-CTX-CGE2	H_IN-CTX-CGE
S26.G11	H_Sci	17.3	968229	1370	IN-CTX-CGE2	IN-CTX-CGE2	H_IN-CTX-CGE
S26.G12	H_Sci	17.3	973943	2118	IN-CTX-CGE2	IN-CTX-CGE2	H_IN-CTX-CGE
S27.B8	H_Sci	17.3	975475	1352	IN-CTX-CGE2	IN-CTX-CGE2	H_IN-CTX-CGE
S27.A11	H_Sci	17.3	972575	1063	IN-CTX-CGE2	IN-CTX-CGE2	H_IN-CTX-CGE
S27.B11	H_Sci	17.3	971753	1146	IN-CTX-CGE2	IN-CTX-CGE2	H_IN-CTX-CGE
S33.A9	H_Sci	32	932154	1622	IN-CTX-CGE2	IN-CTX-CGE2	H_IN-CTX-CGE
S37.F1	H_Sci	16.3	967190	2083	IN-CTX-CGE2	IN-CTX-CGE2	H_IN-CTX-CGE
S37.F3	H_Sci	16.3	977823	2864	IN-CTX-CGE2	IN-CTX-CGE2	H_IN-CTX-CGE
S37.B4	H_Sci	16.3	977075	2207	IN-CTX-CGE2	IN-CTX-CGE2	H_IN-CTX-CGE
S37.F12	H_Sci	16.3	972557	2655	IN-CTX-CGE2	IN-CTX-CGE2	H_IN-CTX-CGE
S38.H11	H_Sci	16.3	977932	2528	IN-CTX-CGE2	IN-CTX-CGE2	H_IN-CTX-CGE
S41.E2	H_Sci	13.3	974999	1545	IN-CTX-CGE2	IN-CTX-CGE2	H_IN-CTX-CGE
S41.E8	H_Sci	13.3	974636	1536	IN-CTX-CGE2	IN-CTX-CGE2	H_IN-CTX-CGE
S42.B11	H_Sci	18.5	965017	2215	IN-CTX-CGE2	IN-CTX-CGE2	H_IN-CTX-CGE
S44.F6	H_Sci	17.5	973826	2134	IN-CTX-CGE2	IN-CTX-CGE2	H_IN-CTX-CGE
S44.D10	H_Sci	17.5	978496	1850	IN-CTX-CGE2	IN-CTX-CGE2	H_IN-CTX-CGE
S45.A2	H_Sci	21.5	977976	1255	IN-CTX-CGE2	IN-CTX-CGE2	H_IN-CTX-CGE
S45.E2	H_Sci	21.5	976566	1956	IN-CTX-CGE2	IN-CTX-CGE2	H_IN-CTX-CGE
S45.D6	H_Sci	21.5	972837	1165	IN-CTX-CGE2	IN-CTX-CGE2	H_IN-CTX-CGE
S45.H6	H_Sci	21.5	973088	1744	IN-CTX-CGE2	IN-CTX-CGE2	H_IN-CTX-CGE
S45.A9	H_Sci	21.5	973121	2080	IN-CTX-CGE2	IN-CTX-CGE2	H_IN-CTX-CGE
S45.D12	H_Sci	21.5	974055	1753	IN-CTX-CGE2	IN-CTX-CGE2	H_IN-CTX-CGE
S45.E12	H_Sci	21.5	978570	2112	IN-CTX-CGE2	IN-CTX-CGE2	H_IN-CTX-CGE
S46.C3	H_Sci	21.5	978289	2388	IN-CTX-CGE2	IN-CTX-CGE2	H_IN-CTX-CGE
S46.E4	H_Sci	21.5	979761	1876	IN-CTX-CGE2	IN-CTX-CGE2	H_IN-CTX-CGE
S46.F6	H_Sci	21.5	974172	1728	IN-CTX-CGE2	IN-CTX-CGE2	H_IN-CTX-CGE
S46.F7	H_Sci	21.5	980294	2665	IN-CTX-CGE2	IN-CTX-CGE2	H_IN-CTX-CGE
S46.B10	H_Sci	21.5	971009	2247	IN-CTX-CGE2	IN-CTX-CGE2	H_IN-CTX-CGE
S46.A11	H_Sci	21.5	971690	2442	IN-CTX-CGE2	IN-CTX-CGE2	H_IN-CTX-CGE
S46.D12	H_Sci	21.5	966546	2079	IN-CTX-CGE2	IN-CTX-CGE2	H_IN-CTX-CGE
S47.A3	H_Sci	21.5	971693	2026	IN-CTX-CGE2	IN-CTX-CGE2	H_IN-CTX-CGE
S47.A4	H_Sci	21.5	977234	3483	IN-CTX-CGE2	IN-CTX-CGE2	H_IN-CTX-CGE
S47.C7	H_Sci	21.5	978631	1832	IN-CTX-CGE2	IN-CTX-CGE2	H_IN-CTX-CGE
S47.E8	H_Sci	21.5	986144	1499	IN-CTX-CGE2	IN-CTX-CGE2	H_IN-CTX-CGE
S51.B12	H_Sci	13	979404	2125	IN-CTX-CGE2	IN-CTX-CGE2	H_IN-CTX-CGE
S52.E5	H_Sci	13	981045	3493	IN-CTX-CGE2	IN-CTX-CGE2	H_IN-CTX-CGE
S52.F5	H_Sci	13	981571	2388	IN-CTX-CGE2	IN-CTX-CGE2	H_IN-CTX-CGE
S52.G7	H_Sci	19	980465	1829	IN-CTX-CGE2	IN-CTX-CGE2	H_IN-CTX-CGE
S53.B3	H_Sci	14.2	978670	1542	IN-CTX-CGE2	IN-CTX-CGE2	H_IN-CTX-CGE
S53.C3	H_Sci	14.2	976302	1564	IN-CTX-CGE2	IN-CTX-CGE2	H_IN-CTX-CGE
S53.G8	H_Sci	13.3	979083	2349	IN-CTX-CGE2	IN-CTX-CGE2	H_IN-CTX-CGE
S55.F3	H_Sci	18.5	972953	2711	IN-CTX-CGE2	IN-CTX-CGE2	H_IN-CTX-CGE
S56.A9	H_Sci	13	971620	2058	IN-CTX-CGE2	IN-CTX-CGE2	H_IN-CTX-CGE
S57.H1	H_Sci	20	973554	1785	IN-CTX-CGE2	IN-CTX-CGE2	H_IN-CTX-CGE
S57.D2	H_Sci	20	965282	1561	IN-CTX-CGE2	IN-CTX-CGE2	H_IN-CTX-CGE
S57.C3	H_Sci	20	963316	1856	IN-CTX-CGE2	IN-CTX-CGE2	H_IN-CTX-CGE
S57.F4	H_Sci	20	966617	1619	IN-CTX-CGE2	IN-CTX-CGE2	H_IN-CTX-CGE
S57.D6	H_Sci	20	957480	1538	IN-CTX-CGE2	IN-CTX-CGE2	H_IN-CTX-CGE
S57.B7	H_Sci	20	952277	1868	IN-CTX-CGE2	IN-CTX-CGE2	H_IN-CTX-CGE
S57.A9	H_Sci	20	957491	1974	IN-CTX-CGE2	IN-CTX-CGE2	H_IN-CTX-CGE
S72.D3	H_Sci	17.7	975293	2132	IN-CTX-CGE2	IN-CTX-CGE2	H_IN-CTX-CGE
S72.E8	H_Sci	17.7	978253	2994	IN-CTX-CGE2	IN-CTX-CGE2	H_IN-CTX-CGE
S79.F2	H_Sci	19	985908	1136	IN-CTX-CGE2	IN-CTX-CGE2	H_IN-CTX-CGE
S79.D4	H_Sci	19	991718	1005	IN-CTX-CGE2	IN-CTX-CGE2	H_IN-CTX-CGE
S79.C6	H_Sci	19	985136	1167	IN-CTX-CGE2	IN-CTX-CGE2	H_IN-CTX-CGE
S79.C7	H_Sci	19	972285	1121	IN-CTX-CGE2	IN-CTX-CGE2	H_IN-CTX-CGE
S82.F3	H_Sci	11.5	977924	3086	IN-CTX-CGE2	IN-CTX-CGE2	H_IN-CTX-CGE
S82.G4	H_Sci	11.5	977708	2604	IN-CTX-CGE2	IN-CTX-CGE2	H_IN-CTX-CGE
S84.G11	H_Sci	13	976285	1904	IN-CTX-CGE2	IN-CTX-CGE2	H_IN-CTX-CGE
S81.B11	H_Sci	15	975544	1133	IN-CTX-CGE2	IN-CTX-CGE2	H_IN-CTX-CGE
S85.B3	H_Sci	17.5	971871	2138	IN-CTX-CGE2	IN-CTX-CGE2	H_IN-CTX-CGE
S85.C3	H_Sci	17.5	984514	2476	IN-CTX-CGE2	IN-CTX-CGE2	H_IN-CTX-CGE
S85.C8	H_Sci	17.5	981100	2588	IN-CTX-CGE2	IN-CTX-CGE2	H_IN-CTX-CGE
S85.G9	H_Sci	17.5	976447	2229	IN-CTX-CGE2	IN-CTX-CGE2	H_IN-CTX-CGE
S86.E3	H_Sci	17.5	976479	2200	IN-CTX-CGE2	IN-CTX-CGE2	H_IN-CTX-CGE
S86.G11	H_Sci	17.5	973060	2013	IN-CTX-CGE2	IN-CTX-CGE2	H_IN-CTX-CGE
S86.A12	H_Sci	17.5	972427	1863	IN-CTX-CGE2	IN-CTX-CGE2	H_IN-CTX-CGE
S87.C6	H_Sci	17.5	970797	1436	IN-CTX-CGE2	IN-CTX-CGE2	H_IN-CTX-CGE
S88.A3	H_Sci	13	983234	1783	IN-CTX-CGE2	IN-CTX-CGE2	H_IN-CTX-CGE
S88.H9	H_Sci	13	979855	2455	IN-CTX-CGE2	IN-CTX-CGE2	H_IN-CTX-CGE
S91.D2	H_Sci	16	979387	1573	IN-CTX-CGE2	IN-CTX-CGE2	H_IN-CTX-CGE
S91.G2	H_Sci	16	975678	2268	IN-CTX-CGE2	IN-CTX-CGE2	H_IN-CTX-CGE
S91.H8	H_Sci	16	974881	2159	IN-CTX-CGE2	IN-CTX-CGE2	H_IN-CTX-CGE
S91.D9	H_Sci	16	971468	2107	IN-CTX-CGE2	IN-CTX-CGE2	H_IN-CTX-CGE
S92.B6	H_Sci	16.5	924546	1055	IN-CTX-CGE2	IN-CTX-CGE2	H_IN-CTX-CGE
S92.C6	H_Sci	16.5	985296	1161	IN-CTX-CGE2	IN-CTX-CGE2	H_IN-CTX-CGE
S92.E6	H_Sci	16.5	977881	1137	IN-CTX-CGE2	IN-CTX-CGE2	H_IN-CTX-CGE
S92.F6	H_Sci	16.5	975055	1345	IN-CTX-CGE2	IN-CTX-CGE2	H_IN-CTX-CGE
S92.H8	H_Sci	16.5	962409	1070	IN-CTX-CGE2	IN-CTX-CGE2	H_IN-CTX-CGE
S92.B9	H_Sci	16.5	976507	2228	IN-CTX-CGE2	IN-CTX-CGE2	H_IN-CTX-CGE
S92.D10	H_Sci	16.5	958034	1111	IN-CTX-CGE2	IN-CTX-CGE2	H_IN-CTX-CGE
S95.C3	H_Sci	13	942656	1113	IN-CTX-CGE2	IN-CTX-CGE2	H_IN-CTX-CGE
S95.E4	H_Sci	13	979911	2296	IN-CTX-CGE2	IN-CTX-CGE2	H_IN-CTX-CGE
S95.E7	H_Sci	13	977695	2541	IN-CTX-CGE2	IN-CTX-CGE2	H_IN-CTX-CGE
S95.C10	H_Sci	13	971506	2147	IN-CTX-CGE2	IN-CTX-CGE2	H_IN-CTX-CGE
S103.G12	H_Sci	17	979382	1577	IN-CTX-CGE2	IN-CTX-CGE2	H_IN-CTX-CGE
S113.G3	H_Sci	21.5	978774	2692	IN-CTX-CGE2	IN-CTX-CGE2	H_IN-CTX-CGE
S113.B6	H_Sci	21.5	978040	1771	IN-CTX-CGE2	IN-CTX-CGE2	H_IN-CTX-CGE
S113.C7	H_Sci	21.5	982398	2765	IN-CTX-CGE2	IN-CTX-CGE2	H_IN-CTX-CGE
S113.F9	H_Sci	21.5	975468	1494	IN-CTX-CGE2	IN-CTX-CGE2	H_IN-CTX-CGE
S114.G1	H_Sci	22	985439	1847	IN-CTX-CGE2	IN-CTX-CGE2	H_IN-CTX-CGE
S114.C3	H_Sci	22	976785	2410	IN-CTX-CGE2	IN-CTX-CGE2	H_IN-CTX-CGE
S114.A6	H_Sci	22	985518	1813	IN-CTX-CGE2	IN-CTX-CGE2	H_IN-CTX-CGE
S114.B7	H_Sci	22	981868	4031	IN-CTX-CGE2	IN-CTX-CGE2	H_IN-CTX-CGE
S114.E7	H_Sci	22	983928	3313	IN-CTX-CGE2	IN-CTX-CGE2	H_IN-CTX-CGE
S114.E9	H_Sci	22	982931	8899	IN-CTX-CGE2	IN-CTX-CGE2	H_IN-CTX-CGE
S114.A10	H_Sci	22	982830	2935	IN-CTX-CGE2	IN-CTX-CGE2	H_IN-CTX-CGE
S115.H2	H_Sci	22	982000	2736	IN-CTX-CGE2	IN-CTX-CGE2	H_IN-CTX-CGE
S115.D8	H_Sci	22	976732	2791	IN-CTX-CGE2	IN-CTX-CGE2	H_IN-CTX-CGE
S116.C4	H_Sci	22	979980	1720	IN-CTX-CGE2	IN-CTX-CGE2	H_IN-CTX-CGE
S116.A5	H_Sci	22	980505	1970	IN-CTX-CGE2	IN-CTX-CGE2	H_IN-CTX-CGE
S116.B5	H_Sci	22	973052	3045	IN-CTX-CGE2	IN-CTX-CGE2	H_IN-CTX-CGE
S116.C5	H_Sci	22	983671	2477	IN-CTX-CGE2	IN-CTX-CGE2	H_IN-CTX-CGE
S116.D5	H_Sci	22	974959	2258	IN-CTX-CGE2	IN-CTX-CGE2	H_IN-CTX-CGE
S116.A6	H_Sci	22	967781	2082	IN-CTX-CGE2	IN-CTX-CGE2	H_IN-CTX-CGE
S116.A9	H_Sci	22	980818	3076	IN-CTX-CGE2	IN-CTX-CGE2	H_IN-CTX-CGE
S116.D9	H_Sci	22	987019	2493	IN-CTX-CGE2	IN-CTX-CGE2	H_IN-CTX-CGE
S140.E12	H_Sci	20	974805	2637	IN-CTX-CGE2	IN-CTX-CGE2	H_IN-CTX-CGE
S162.B4	H_Sci	23	987856	1389	IN-CTX-CGE2	IN-CTX-CGE2	H_IN-CTX-CGE
S162.A6	H_Sci	23	982205	1612	IN-CTX-CGE2	IN-CTX-CGE2	H_IN-CTX-CGE
S162.F8	H_Sci	23	988735	1348	IN-CTX-CGE2	IN-CTX-CGE2	H_IN-CTX-CGE
S162.F9	H_Sci	23	983553	1529	IN-CTX-CGE2	IN-CTX-CGE2	H_IN-CTX-CGE
S162.E10	H_Sci	23	980252	1634	IN-CTX-CGE2	IN-CTX-CGE2	H_IN-CTX-CGE
S189.G4	H_Sci	8	977485	1190	IN-CTX-CGE2	IN-CTX-CGE2	H_IN-CTX-CGE
Hi_GW16_14.Hi_GW16_14	H_Sci	14	981500	5580	IPC-div2	IPC-div2	H_IPC-div
O1.C1	H_Sci	18.5	958874	1668	IPC-div2	IPC-div2	H_IPC-div
O1.A2	H_Sci	18.5	983389	2384	IPC-div2	IPC-div2	H_IPC-div
O1.B4	H_Sci	18.5	976217	4041	IPC-div2	IPC-div2	H_IPC-div
O1.C11	H_Sci	18.5	972942	3025	IPC-div2	IPC-div2	H_IPC-div
O1.D11	H_Sci	18.5	978602	5004	IPC-div2	IPC-div2	H_IPC-div
O2.F3	H_Sci	18.5	975932	4145	IPC-div2	IPC-div2	H_IPC-div
O2.F4	H_Sci	18.5	978353	4635	IPC-div2	IPC-div2	H_IPC-div
O2.A11	H_Sci	18.5	976793	3825	IPC-div2	IPC-div2	H_IPC-div
O4.C2	H_Sci	14	976191	4273	IPC-div2	IPC-div2	H_IPC-div
O4.G2	H_Sci	14	978233	4175	IPC-div2	IPC-div2	H_IPC-div
O4.H2	H_Sci	14	982052	3615	IPC-div2	IPC-div2	H_IPC-div
O4.A4	H_Sci	14	973962	3939	IPC-div2	IPC-div2	H_IPC-div
O4.H7	H_Sci	14	978753	4155	IPC-div2	IPC-div2	H_IPC-div
O4.C11	H_Sci	14	985243	3725	IPC-div2	IPC-div2	H_IPC-div
O7.E6	H_Sci	14.7	975832	4415	IPC-div2	IPC-div2	H_IPC-div
O8.B1	H_Sci	14.7	976364	4593	IPC-div2	IPC-div2	H_IPC-div
O8.H1	H_Sci	14.7	983720	1463	IPC-div2	IPC-div2	H_IPC-div
O8.H11	H_Sci	14.7	975538	5075	IPC-div2	IPC-div2	H_IPC-div
O9.A12	H_Sci	14.7	977778	5318	IPC-div2	IPC-div2	H_IPC-div
S2.E6	H_Sci	11	978041	3379	IPC-div2	IPC-div2	H_IPC-div
S2.G9	H_Sci	11	976868	4130	IPC-div2	IPC-div2	H_IPC-div
S3.H9	H_Sci	14.5	977017	2982	IPC-div2	IPC-div2	H_IPC-div
S20.C1	H_Sci	14.2	981585	1190	IPC-div2	IPC-div2	H_IPC-div
S20.C12	H_Sci	14.2	973302	3248	IPC-div2	IPC-div2	H_IPC-div
S23.B5	H_Sci	13.3	975254	3073	IPC-div2	IPC-div2	H_IPC-div
S24.F6	H_Sci	13.3	974715	3186	IPC-div2	IPC-div2	H_IPC-div
S27.F1	H_Sci	17.3	978043	1640	IPC-div2	IPC-div2	H_IPC-div
S27.F10	H_Sci	17.3	978852	3621	IPC-div2	IPC-div2	H_IPC-div
S27.D11	H_Sci	17.3	977936	2650	IPC-div2	IPC-div2	H_IPC-div
S36.A9	H_Sci	16.3	978149	4584	IPC-div2	IPC-div2	H_IPC-div
S36.C10	H_Sci	16.3	963154	7776	IPC-div2	IPC-div2	H_IPC-div
S37.A2	H_Sci	16.3	978770	4343	IPC-div2	IPC-div2	H_IPC-div
S37.A8	H_Sci	16.3	978233	5192	IPC-div2	IPC-div2	H_IPC-div
S37.B9	H_Sci	16.3	989395	1966	IPC-div2	IPC-div2	H_IPC-div
S38.F5	H_Sci	16.3	971049	4319	IPC-div2	IPC-div2	H_IPC-div
S38.E9	H_Sci	16.3	980142	4940	IPC-div2	IPC-div2	H_IPC-div
S42.A9	H_Sci	18.5	978344	3523	IPC-div2	IPC-div2	H_IPC-div
S46.E7	H_Sci	21.5	978639	3281	IPC-div2	IPC-div2	H_IPC-div
S53.F5	H_Sci	14.2	982265	2751	IPC-div2	IPC-div2	H_IPC-div
S55.E3	H_Sci	18.5	969887	3462	IPC-div2	IPC-div2	H_IPC-div
S56.B3	H_Sci	13	961592	3225	IPC-div2	IPC-div2	H_IPC-div
S83.A1	H_Sci	11.5	979573	4542	IPC-div2	IPC-div2	H_IPC-div
S85.F4	H_Sci	17.5	981424	3570	IPC-div2	IPC-div2	H_IPC-div
S92.F1	H_Sci	16	973294	2451	IPC-div2	IPC-div2	H_IPC-div
S92.G1	H_Sci	16	978165	2366	IPC-div2	IPC-div2	H_IPC-div
S92.G10	H_Sci	16.5	979965	2554	IPC-div2	IPC-div2	H_IPC-div
S92.F12	H_Sci	16.5	980775	3017	IPC-div2	IPC-div2	H_IPC-div
S93.E4	H_Sci	13	974975	4324	IPC-div2	IPC-div2	H_IPC-div
S96.C2	H_Sci	14	982603	4029	IPC-div2	IPC-div2	H_IPC-div
S96.F6	H_Sci	14	971410	3450	IPC-div2	IPC-div2	H_IPC-div
Hi_GW16_16.Hi_GW16_16	H_Sci	14	976948	5824	oRG	oRG	H_oRG
O1.E6	H_Sci	18.5	976214	4879	oRG	oRG	H_oRG
O4.E7	H_Sci	14	975963	3321	oRG	oRG	H_oRG
O4.F12	H_Sci	14	976113	3610	oRG	oRG	H_oRG
O7.D2	H_Sci	14.7	979379	4470	oRG	oRG	H_oRG
O7.H3	H_Sci	14.7	981831	3877	oRG	oRG	H_oRG
O8.H2	H_Sci	14.7	979370	4337	oRG	oRG	H_oRG
O9.E2	H_Sci	14.7	978237	3931	oRG	oRG	H_oRG
O9.B8	H_Sci	14.7	983297	3569	oRG	oRG	H_oRG
O12.F2	H_Sci	14	979636	3881	oRG	oRG	H_oRG
O12.A3	H_Sci	14	981021	4818	oRG	oRG	H_oRG
O12.A10	H_Sci	22	980529	4891	oRG	oRG	H_oRG
O12.D10	H_Sci	22	981995	5450	oRG	oRG	H_oRG
S1.F10	H_Sci	11	978660	3434	oRG	oRG	H_oRG
S16.H1	H_Sci	13	979121	4079	oRG	oRG	H_oRG
S16.A4	H_Sci	13	982206	3793	oRG	oRG	H_oRG
S17.G10	H_Sci	19	977574	3699	oRG	oRG	H_oRG
S21.G2	H_Sci	14.2	973406	3198	oRG	oRG	H_oRG
S21.D6	H_Sci	14.2	981181	3139	oRG	oRG	H_oRG
S24.A10	H_Sci	13.3	977359	4420	oRG	oRG	H_oRG
S26.C4	H_Sci	17.3	977182	5086	oRG	oRG	H_oRG
S27.H3	H_Sci	17.3	973356	3638	oRG	oRG	H_oRG
S27.H5	H_Sci	17.3	968688	3012	oRG	oRG	H_oRG
S27.H12	H_Sci	17.3	982281	3930	oRG	oRG	H_oRG
S28.G1	H_Sci	14.2	965900	4732	oRG	oRG	H_oRG
S28.D4	H_Sci	14.2	973815	6514	oRG	oRG	H_oRG
S28.G5	H_Sci	14.2	970607	8472	oRG	oRG	H_oRG
S36.A11	H_Sci	16.3	979692	5018	oRG	oRG	H_oRG
S37.A5	H_Sci	16.3	977272	4777	oRG	oRG	H_oRG
S37.D12	H_Sci	16.3	982262	4322	oRG	oRG	H_oRG
S42.F7	H_Sci	18.5	957536	3809	oRG	oRG	H_oRG
S44.D5	H_Sci	17.5	975021	4114	oRG	oRG	H_oRG
S44.E10	H_Sci	17.5	980636	4622	oRG	oRG	H_oRG
S45.G2	H_Sci	21.5	969790	3628	oRG	oRG	H_oRG
S45.H9	H_Sci	21.5	979409	3932	oRG	oRG	H_oRG
S45.D10	H_Sci	21.5	983398	3951	oRG	oRG	H_oRG
S46.D3	H_Sci	21.5	980478	4768	oRG	oRG	H_oRG
S46.A10	H_Sci	21.5	971332	4206	oRG	oRG	H_oRG
S46.F10	H_Sci	21.5	980812	3342	oRG	oRG	H_oRG
S47.H1	H_Sci	21.5	969638	1964	oRG	oRG	H_oRG
S47.E6	H_Sci	21.5	971911	4151	oRG	oRG	H_oRG
S47.H12	H_Sci	21.5	970950	4773	oRG	oRG	H_oRG
S51.F12	H_Sci	13	982779	4396	oRG	oRG	H_oRG
S52.D2	H_Sci	13	978580	3829	oRG	oRG	H_oRG
S52.F7	H_Sci	19	980434	5025	oRG	oRG	H_oRG
S55.C5	H_Sci	18.5	980627	5186	oRG	oRG	H_oRG
S56.H11	H_Sci	13	977534	3837	oRG	oRG	H_oRG
S56.G12	H_Sci	13	974191	3335	oRG	oRG	H_oRG
S81.B1	H_Sci	15	984621	4245	oRG	oRG	H_oRG
S81.B8	H_Sci	15	977466	3811	oRG	oRG	H_oRG
S85.E1	H_Sci	17.5	975081	1931	oRG	oRG	H_oRG
S85.E10	H_Sci	17.5	978872	2974	oRG	oRG	H_oRG
S86.B4	H_Sci	17.5	973168	3355	oRG	oRG	H_oRG
S86.B12	H_Sci	17.5	981116	3002	oRG	oRG	H_oRG
S87.G6	H_Sci	17.5	973406	4677	oRG	oRG	H_oRG
S88.C2	H_Sci	13	978102	3504	oRG	oRG	H_oRG
S93.C4	H_Sci	13	973196	5786	oRG	oRG	H_oRG
S103.C2	H_Sci	17	985316	4136	oRG	oRG	H_oRG
S140.B1	H_Sci	20	977448	2437	oRG	oRG	H_oRG
S140.E2	H_Sci	20	977680	4249	oRG	oRG	H_oRG
S140.G6	H_Sci	20	975723	4387	oRG	oRG	H_oRG
S140.A7	H_Sci	20	978262	5418	oRG	oRG	H_oRG
S140.C9	H_Sci	20	978608	5123	oRG	oRG	H_oRG
S140.G10	H_Sci	20	976829	5571	oRG	oRG	H_oRG
S140.B11	H_Sci	20	980855	5730	oRG	oRG	H_oRG
Hi_GW16_24.Hi_GW16_24	H_Sci	14	982617	3405	IPC-nEN1	IPC-nEN1	H_IPC-nEN
O1.B1	H_Sci	18.5	972466	2252	IPC-nEN1	IPC-nEN1	H_IPC-nEN
O1.B6	H_Sci	18.5	971709	2908	IPC-nEN1	IPC-nEN1	H_IPC-nEN
O1.B10	H_Sci	18.5	975703	2801	IPC-nEN1	IPC-nEN1	H_IPC-nEN
O1.G11	H_Sci	18.5	974887	2915	IPC-nEN1	IPC-nEN1	H_IPC-nEN
O1.A12	H_Sci	18.5	976607	2840	IPC-nEN1	IPC-nEN1	H_IPC-nEN
O2.E5	H_Sci	18.5	969596	2635	IPC-nEN1	IPC-nEN1	H_IPC-nEN
O2.C8	H_Sci	18.5	973497	2574	IPC-nEN1	IPC-nEN1	H_IPC-nEN
O2.A10	H_Sci	18.5	974730	2172	IPC-nEN1	IPC-nEN1	H_IPC-nEN
O2.D11	H_Sci	18.5	974996	2454	IPC-nEN1	IPC-nEN1	H_IPC-nEN
O4.H1	H_Sci	14	982869	2357	IPC-nEN1	IPC-nEN1	H_IPC-nEN
O4.B6	H_Sci	14	970743	2527	IPC-nEN1	IPC-nEN1	H_IPC-nEN
O4.A7	H_Sci	14	978857	2800	IPC-nEN1	IPC-nEN1	H_IPC-nEN
O4.A8	H_Sci	14	982874	2719	IPC-nEN1	IPC-nEN1	H_IPC-nEN
O4.H12	H_Sci	14	980466	2529	IPC-nEN1	IPC-nEN1	H_IPC-nEN
O7.C1	H_Sci	14.7	979338	3032	IPC-nEN1	IPC-nEN1	H_IPC-nEN
O7.A3	H_Sci	14.7	973215	3467	IPC-nEN1	IPC-nEN1	H_IPC-nEN
O7.D3	H_Sci	14.7	968423	2202	IPC-nEN1	IPC-nEN1	H_IPC-nEN
O7.F3	H_Sci	14.7	973681	3009	IPC-nEN1	IPC-nEN1	H_IPC-nEN
O7.F7	H_Sci	14.7	983299	3104	IPC-nEN1	IPC-nEN1	H_IPC-nEN
O7.C11	H_Sci	14.7	974845	3144	IPC-nEN1	IPC-nEN1	H_IPC-nEN
O9.C4	H_Sci	14.7	975609	3870	IPC-nEN1	IPC-nEN1	H_IPC-nEN
O9.E4	H_Sci	14.7	975932	3562	IPC-nEN1	IPC-nEN1	H_IPC-nEN
O10.H1	H_Sci	14.7	981634	1728	IPC-nEN1	IPC-nEN1	H_IPC-nEN
O12.A2	H_Sci	14	974719	2338	IPC-nEN1	IPC-nEN1	H_IPC-nEN
S2.A2	H_Sci	11	980116	2569	IPC-nEN1	IPC-nEN1	H_IPC-nEN
S3.F1	H_Sci	14.5	978909	2315	IPC-nEN1	IPC-nEN1	H_IPC-nEN
S3.G2	H_Sci	14.5	970312	1922	IPC-nEN1	IPC-nEN1	H_IPC-nEN
S3.E3	H_Sci	14.5	967538	2344	IPC-nEN1	IPC-nEN1	H_IPC-nEN
S19.C4	H_Sci	14.2	970978	2713	IPC-nEN1	IPC-nEN1	H_IPC-nEN
S26.B3	H_Sci	17.3	969204	3783	IPC-nEN1	IPC-nEN1	H_IPC-nEN
S27.G4	H_Sci	17.3	971317	2290	IPC-nEN1	IPC-nEN1	H_IPC-nEN
S35.A7	H_Sci	15	963593	2128	IPC-nEN1	IPC-nEN1	H_IPC-nEN
S36.D12	H_Sci	16.3	959543	2997	IPC-nEN1	IPC-nEN1	H_IPC-nEN
S37.E1	H_Sci	16.3	976664	2656	IPC-nEN1	IPC-nEN1	H_IPC-nEN
S37.E2	H_Sci	16.3	973575	2472	IPC-nEN1	IPC-nEN1	H_IPC-nEN
S38.C1	H_Sci	16.3	975790	4755	IPC-nEN1	IPC-nEN1	H_IPC-nEN
S38.E3	H_Sci	16.3	975060	3259	IPC-nEN1	IPC-nEN1	H_IPC-nEN
S38.H3	H_Sci	16.3	974211	3659	IPC-nEN1	IPC-nEN1	H_IPC-nEN
S38.C4	H_Sci	16.3	970789	3248	IPC-nEN1	IPC-nEN1	H_IPC-nEN
S38.D11	H_Sci	16.3	975156	3610	IPC-nEN1	IPC-nEN1	H_IPC-nEN
S42.B1	H_Sci	13.3	972226	3289	IPC-nEN1	IPC-nEN1	H_IPC-nEN
S42.D1	H_Sci	13.3	976001	2800	IPC-nEN1	IPC-nEN1	H_IPC-nEN
S42.G1	H_Sci	13.3	971015	3292	IPC-nEN1	IPC-nEN1	H_IPC-nEN
S42.B2	H_Sci	13.3	974524	3213	IPC-nEN1	IPC-nEN1	H_IPC-nEN
S42.B12	H_Sci	18.5	979427	2505	IPC-nEN1	IPC-nEN1	H_IPC-nEN
S42.G12	H_Sci	18.5	962245	2749	IPC-nEN1	IPC-nEN1	H_IPC-nEN
S44.D8	H_Sci	17.5	970520	2638	IPC-nEN1	IPC-nEN1	H_IPC-nEN
S44.D9	H_Sci	17.5	975599	3131	IPC-nEN1	IPC-nEN1	H_IPC-nEN
S45.E5	H_Sci	21.5	970866	2602	IPC-nEN1	IPC-nEN1	H_IPC-nEN
S46.C10	H_Sci	21.5	973898	1928	IPC-nEN1	IPC-nEN1	H_IPC-nEN
S47.G1	H_Sci	21.5	963513	1794	IPC-nEN1	IPC-nEN1	H_IPC-nEN
S47.G10	H_Sci	21.5	963258	2545	IPC-nEN1	IPC-nEN1	H_IPC-nEN
S51.H1	H_Sci	11	970490	3017	IPC-nEN1	IPC-nEN1	H_IPC-nEN
S51.H11	H_Sci	13	978937	2722	IPC-nEN1	IPC-nEN1	H_IPC-nEN
S53.D3	H_Sci	14.2	973984	2784	IPC-nEN1	IPC-nEN1	H_IPC-nEN
S55.F1	H_Sci	13.3	970507	3286	IPC-nEN1	IPC-nEN1	H_IPC-nEN
S82.G6	H_Sci	11.5	977445	3001	IPC-nEN1	IPC-nEN1	H_IPC-nEN
S82.A7	H_Sci	11.5	978087	3487	IPC-nEN1	IPC-nEN1	H_IPC-nEN
S84.D8	H_Sci	13	977207	2894	IPC-nEN1	IPC-nEN1	H_IPC-nEN
S81.C10	H_Sci	15	976514	3198	IPC-nEN1	IPC-nEN1	H_IPC-nEN
S85.A7	H_Sci	17.5	976313	2628	IPC-nEN1	IPC-nEN1	H_IPC-nEN
S86.D9	H_Sci	17.5	970722	2282	IPC-nEN1	IPC-nEN1	H_IPC-nEN
S88.D3	H_Sci	13	979780	3703	IPC-nEN1	IPC-nEN1	H_IPC-nEN
S91.F8	H_Sci	16	979172	2284	IPC-nEN1	IPC-nEN1	H_IPC-nEN
S94.D6	H_Sci	13	969164	2459	IPC-nEN1	IPC-nEN1	H_IPC-nEN
S177.C1	H_Sci	18	983562	2592	IPC-nEN1	IPC-nEN1	H_IPC-nEN
S177.C11	H_Sci	18	977320	2622	IPC-nEN1	IPC-nEN1	H_IPC-nEN
O1.D1	H_Sci	18.5	968361	1817	IPC-div1	IPC-div1	H_IPC-div
O1.E4	H_Sci	18.5	972462	4393	IPC-div1	IPC-div1	H_IPC-div
O1.C5	H_Sci	18.5	978797	3697	IPC-div1	IPC-div1	H_IPC-div
O2.H4	H_Sci	18.5	978393	4418	IPC-div1	IPC-div1	H_IPC-div
O4.B8	H_Sci	14	978201	3027	IPC-div1	IPC-div1	H_IPC-div
O8.A5	H_Sci	14.7	978663	3991	IPC-div1	IPC-div1	H_IPC-div
O9.F1	H_Sci	14.7	978421	3058	IPC-div1	IPC-div1	H_IPC-div
O9.A3	H_Sci	14.7	982525	3951	IPC-div1	IPC-div1	H_IPC-div
O9.H5	H_Sci	14.7	978574	4436	IPC-div1	IPC-div1	H_IPC-div
O12.F8	H_Sci	22	974129	3898	IPC-div1	IPC-div1	H_IPC-div
S2.E1	H_Sci	11	981645	2727	IPC-div1	IPC-div1	H_IPC-div
S2.E10	H_Sci	11	979753	4423	IPC-div1	IPC-div1	H_IPC-div
S3.G7	H_Sci	14.5	978150	3442	IPC-div1	IPC-div1	H_IPC-div
S27.B3	H_Sci	17.3	975684	3742	IPC-div1	IPC-div1	H_IPC-div
S35.E5	H_Sci	15	981969	2393	IPC-div1	IPC-div1	H_IPC-div
S35.E7	H_Sci	15	975033	2386	IPC-div1	IPC-div1	H_IPC-div
S35.F7	H_Sci	15	974897	3867	IPC-div1	IPC-div1	H_IPC-div
S35.A9	H_Sci	15	978693	3340	IPC-div1	IPC-div1	H_IPC-div
S36.E10	H_Sci	16.3	972425	3197	IPC-div1	IPC-div1	H_IPC-div
S36.G12	H_Sci	16.3	976996	3612	IPC-div1	IPC-div1	H_IPC-div
S37.G3	H_Sci	16.3	970474	2653	IPC-div1	IPC-div1	H_IPC-div
S42.A3	H_Sci	13.3	974817	3430	IPC-div1	IPC-div1	H_IPC-div
S42.C8	H_Sci	18.5	974746	3821	IPC-div1	IPC-div1	H_IPC-div
S51.C1	H_Sci	11	981294	3614	IPC-div1	IPC-div1	H_IPC-div
S51.D3	H_Sci	14.5	975070	3388	IPC-div1	IPC-div1	H_IPC-div
S51.E11	H_Sci	13	985881	3640	IPC-div1	IPC-div1	H_IPC-div
S51.C12	H_Sci	13	978318	2965	IPC-div1	IPC-div1	H_IPC-div
S52.G2	H_Sci	13	979708	3043	IPC-div1	IPC-div1	H_IPC-div
S52.F3	H_Sci	13	973576	3169	IPC-div1	IPC-div1	H_IPC-div
S56.D11	H_Sci	13	970248	4166	IPC-div1	IPC-div1	H_IPC-div
S83.C3	H_Sci	11.5	977678	3841	IPC-div1	IPC-div1	H_IPC-div
S83.A7	H_Sci	11.5	981252	4348	IPC-div1	IPC-div1	H_IPC-div
S83.F7	H_Sci	11.5	987783	3947	IPC-div1	IPC-div1	H_IPC-div
S83.H8	H_Sci	11.5	982788	4406	IPC-div1	IPC-div1	H_IPC-div
S94.H7	H_Sci	13	976784	3057	IPC-div1	IPC-div1	H_IPC-div
S140.D12	H_Sci	20	977382	4251	IPC-div1	IPC-div1	H_IPC-div
O1.G1	H_Sci	18.5	976790	2116	OPC	OPC	H_OPC
O1.G12	H_Sci	18.5	978185	3971	OPC	OPC	H_OPC
O4.F4	H_Sci	14	983639	3765	OPC	OPC	H_OPC
O12.D1	H_Sci	14	979617	4637	OPC	OPC	H_OPC
S15.H2	H_Sci	13	983740	3500	OPC	OPC	H_OPC
S22.F11	H_Sci	19	982106	4675	OPC	OPC	H_OPC
S26.F1	H_Sci	17.3	968325	1484	OPC	OPC	H_OPC
S26.F11	H_Sci	17.3	976978	2472	OPC	OPC	H_OPC
S32.E8	H_Sci	32	980411	3306	OPC	OPC	H_OPC
S32.G9	H_Sci	32	979035	2004	OPC	OPC	H_OPC
S32.F12	H_Sci	32	974664	2991	OPC	OPC	H_OPC
S32.H12	H_Sci	32	975498	3945	OPC	OPC	H_OPC
S33.F5	H_Sci	32	983718	1966	OPC	OPC	H_OPC
S33.G5	H_Sci	32	978675	4491	OPC	OPC	H_OPC
S33.F8	H_Sci	32	983531	3194	OPC	OPC	H_OPC
S36.G6	H_Sci	16.3	982878	4955	OPC	OPC	H_OPC
S45.G1	H_Sci	21.5	974811	2939	OPC	OPC	H_OPC
S45.A5	H_Sci	21.5	983440	3758	OPC	OPC	H_OPC
S45.G5	H_Sci	21.5	977149	2860	OPC	OPC	H_OPC
S45.H5	H_Sci	21.5	984890	2891	OPC	OPC	H_OPC
S45.A8	H_Sci	21.5	981022	2901	OPC	OPC	H_OPC
S46.F1	H_Sci	21.5	964585	1881	OPC	OPC	H_OPC
S47.D1	H_Sci	21.5	974037	1160	OPC	OPC	H_OPC
S47.H3	H_Sci	21.5	992400	1528	OPC	OPC	H_OPC
S47.D12	H_Sci	21.5	980895	3382	OPC	OPC	H_OPC
S50.F11	H_Sci	11	982837	5066	OPC	OPC	H_OPC
S53.G1	H_Sci	14.2	975875	1818	OPC	OPC	H_OPC
S56.A1	H_Sci	13	973338	2189	OPC	OPC	H_OPC
S56.A10	H_Sci	13	967230	2380	OPC	OPC	H_OPC
S57.D1	H_Sci	20	981716	2807	OPC	OPC	H_OPC
S84.C9	H_Sci	13	979984	4131	OPC	OPC	H_OPC
S91.D8	H_Sci	16	982559	4488	OPC	OPC	H_OPC
S113.F1	H_Sci	21.5	969102	2919	OPC	OPC	H_OPC
S113.E3	H_Sci	21.5	976756	2211	OPC	OPC	H_OPC
S113.H3	H_Sci	21.5	972982	1527	OPC	OPC	H_OPC
S113.F6	H_Sci	21.5	980106	1976	OPC	OPC	H_OPC
S116.C7	H_Sci	22	982009	3978	OPC	OPC	H_OPC
O1.C2	H_Sci	18.5	970279	2153	IN-CTX-MGE2	IN-CTX-MGE2	H_IN-CTX-MGE
O1.E10	H_Sci	18.5	978665	2886	IN-CTX-MGE2	IN-CTX-MGE2	H_IN-CTX-MGE
O2.C9	H_Sci	18.5	986933	1776	IN-CTX-MGE2	IN-CTX-MGE2	H_IN-CTX-MGE
O4.A5	H_Sci	14	981579	2490	IN-CTX-MGE2	IN-CTX-MGE2	H_IN-CTX-MGE
O10.D8	H_Sci	14.7	976950	2933	IN-CTX-MGE2	IN-CTX-MGE2	H_IN-CTX-MGE
O11.G5	H_Sci	16	978300	1562	IN-CTX-MGE2	IN-CTX-MGE2	H_IN-CTX-MGE
O11.G11	H_Sci	16	972143	1469	IN-CTX-MGE2	IN-CTX-MGE2	H_IN-CTX-MGE
O12.A4	H_Sci	14	974207	1099	IN-CTX-MGE2	IN-CTX-MGE2	H_IN-CTX-MGE
O12.H10	H_Sci	22	971022	2689	IN-CTX-MGE2	IN-CTX-MGE2	H_IN-CTX-MGE
S19.D10	H_Sci	14.2	962731	1670	IN-CTX-MGE2	IN-CTX-MGE2	H_IN-CTX-MGE
S23.F11	H_Sci	13.3	972819	2808	IN-CTX-MGE2	IN-CTX-MGE2	H_IN-CTX-MGE
S24.G3	H_Sci	13.3	982078	2154	IN-CTX-MGE2	IN-CTX-MGE2	H_IN-CTX-MGE
S24.B4	H_Sci	13.3	978703	2396	IN-CTX-MGE2	IN-CTX-MGE2	H_IN-CTX-MGE
S24.B9	H_Sci	13.3	974339	2211	IN-CTX-MGE2	IN-CTX-MGE2	H_IN-CTX-MGE
S26.E1	H_Sci	17.3	968403	1670	IN-CTX-MGE2	IN-CTX-MGE2	H_IN-CTX-MGE
S26.B2	H_Sci	17.3	978729	2061	IN-CTX-MGE2	IN-CTX-MGE2	H_IN-CTX-MGE
S26.D3	H_Sci	17.3	971429	1655	IN-CTX-MGE2	IN-CTX-MGE2	H_IN-CTX-MGE
S26.F8	H_Sci	17.3	974361	2013	IN-CTX-MGE2	IN-CTX-MGE2	H_IN-CTX-MGE
S26.D12	H_Sci	17.3	973462	1747	IN-CTX-MGE2	IN-CTX-MGE2	H_IN-CTX-MGE
S27.B5	H_Sci	17.3	962743	1867	IN-CTX-MGE2	IN-CTX-MGE2	H_IN-CTX-MGE
S27.C6	H_Sci	17.3	980857	1668	IN-CTX-MGE2	IN-CTX-MGE2	H_IN-CTX-MGE
S27.D12	H_Sci	17.3	976692	2418	IN-CTX-MGE2	IN-CTX-MGE2	H_IN-CTX-MGE
S28.C3	H_Sci	14.2	978118	1566	IN-CTX-MGE2	IN-CTX-MGE2	H_IN-CTX-MGE
S28.B6	H_Sci	14.2	967873	1380	IN-CTX-MGE2	IN-CTX-MGE2	H_IN-CTX-MGE
S37.E6	H_Sci	16.3	978200	2664	IN-CTX-MGE2	IN-CTX-MGE2	H_IN-CTX-MGE
S37.C9	H_Sci	16.3	982818	1246	IN-CTX-MGE2	IN-CTX-MGE2	H_IN-CTX-MGE
S41.A11	H_Sci	13.3	972321	2073	IN-CTX-MGE2	IN-CTX-MGE2	H_IN-CTX-MGE
S42.C12	H_Sci	18.5	974655	2972	IN-CTX-MGE2	IN-CTX-MGE2	H_IN-CTX-MGE
S45.F3	H_Sci	21.5	972067	2227	IN-CTX-MGE2	IN-CTX-MGE2	H_IN-CTX-MGE
S45.B7	H_Sci	21.5	974274	1042	IN-CTX-MGE2	IN-CTX-MGE2	H_IN-CTX-MGE
S45.E7	H_Sci	21.5	980842	2379	IN-CTX-MGE2	IN-CTX-MGE2	H_IN-CTX-MGE
S45.F8	H_Sci	21.5	979707	1797	IN-CTX-MGE2	IN-CTX-MGE2	H_IN-CTX-MGE
S46.D2	H_Sci	21.5	964330	2021	IN-CTX-MGE2	IN-CTX-MGE2	H_IN-CTX-MGE
S46.E3	H_Sci	21.5	966280	2165	IN-CTX-MGE2	IN-CTX-MGE2	H_IN-CTX-MGE
S46.D5	H_Sci	21.5	971842	2479	IN-CTX-MGE2	IN-CTX-MGE2	H_IN-CTX-MGE
S46.B8	H_Sci	21.5	969095	2081	IN-CTX-MGE2	IN-CTX-MGE2	H_IN-CTX-MGE
S46.C8	H_Sci	21.5	977991	1221	IN-CTX-MGE2	IN-CTX-MGE2	H_IN-CTX-MGE
S46.F9	H_Sci	21.5	968904	2216	IN-CTX-MGE2	IN-CTX-MGE2	H_IN-CTX-MGE
S46.E11	H_Sci	21.5	970292	1668	IN-CTX-MGE2	IN-CTX-MGE2	H_IN-CTX-MGE
S46.G11	H_Sci	21.5	979720	2031	IN-CTX-MGE2	IN-CTX-MGE2	H_IN-CTX-MGE
S46.C12	H_Sci	21.5	963706	2106	IN-CTX-MGE2	IN-CTX-MGE2	H_IN-CTX-MGE
S47.F3	H_Sci	21.5	982430	1541	IN-CTX-MGE2	IN-CTX-MGE2	H_IN-CTX-MGE
S47.H4	H_Sci	21.5	973336	2178	IN-CTX-MGE2	IN-CTX-MGE2	H_IN-CTX-MGE
S47.C6	H_Sci	21.5	978733	2076	IN-CTX-MGE2	IN-CTX-MGE2	H_IN-CTX-MGE
S47.F6	H_Sci	21.5	975519	2164	IN-CTX-MGE2	IN-CTX-MGE2	H_IN-CTX-MGE
S47.B7	H_Sci	21.5	978631	1942	IN-CTX-MGE2	IN-CTX-MGE2	H_IN-CTX-MGE
S47.E7	H_Sci	21.5	979144	1633	IN-CTX-MGE2	IN-CTX-MGE2	H_IN-CTX-MGE
S47.A9	H_Sci	21.5	977196	2285	IN-CTX-MGE2	IN-CTX-MGE2	H_IN-CTX-MGE
S56.E6	H_Sci	13	975674	2072	IN-CTX-MGE2	IN-CTX-MGE2	H_IN-CTX-MGE
S57.E1	H_Sci	20	967757	2061	IN-CTX-MGE2	IN-CTX-MGE2	H_IN-CTX-MGE
S57.A6	H_Sci	20	965353	1649	IN-CTX-MGE2	IN-CTX-MGE2	H_IN-CTX-MGE
S57.D8	H_Sci	20	968348	1926	IN-CTX-MGE2	IN-CTX-MGE2	H_IN-CTX-MGE
S57.F8	H_Sci	20	957770	2311	IN-CTX-MGE2	IN-CTX-MGE2	H_IN-CTX-MGE
S57.E10	H_Sci	20	966085	2007	IN-CTX-MGE2	IN-CTX-MGE2	H_IN-CTX-MGE
S72.G4	H_Sci	17.7	964281	2557	IN-CTX-MGE2	IN-CTX-MGE2	H_IN-CTX-MGE
S72.B7	H_Sci	17.7	960649	2582	IN-CTX-MGE2	IN-CTX-MGE2	H_IN-CTX-MGE
S72.H8	H_Sci	17.7	974574	2047	IN-CTX-MGE2	IN-CTX-MGE2	H_IN-CTX-MGE
S79.C2	H_Sci	19	994184	1320	IN-CTX-MGE2	IN-CTX-MGE2	H_IN-CTX-MGE
S79.A4	H_Sci	19	989963	1212	IN-CTX-MGE2	IN-CTX-MGE2	H_IN-CTX-MGE
S79.E4	H_Sci	19	987969	1081	IN-CTX-MGE2	IN-CTX-MGE2	H_IN-CTX-MGE
S79.F4	H_Sci	19	978768	1029	IN-CTX-MGE2	IN-CTX-MGE2	H_IN-CTX-MGE
S79.G5	H_Sci	19	976137	1049	IN-CTX-MGE2	IN-CTX-MGE2	H_IN-CTX-MGE
S79.D6	H_Sci	19	971323	1325	IN-CTX-MGE2	IN-CTX-MGE2	H_IN-CTX-MGE
S79.E7	H_Sci	19	984289	1125	IN-CTX-MGE2	IN-CTX-MGE2	H_IN-CTX-MGE
S79.G9	H_Sci	19	979179	1384	IN-CTX-MGE2	IN-CTX-MGE2	H_IN-CTX-MGE
S80.H12	H_Sci	11.5	976240	2782	IN-CTX-MGE2	IN-CTX-MGE2	H_IN-CTX-MGE
S82.C1	H_Sci	11.5	979860	3072	IN-CTX-MGE2	IN-CTX-MGE2	H_IN-CTX-MGE
S81.E4	H_Sci	15	982221	2229	IN-CTX-MGE2	IN-CTX-MGE2	H_IN-CTX-MGE
S81.G9	H_Sci	15	978815	2707	IN-CTX-MGE2	IN-CTX-MGE2	H_IN-CTX-MGE
S85.H1	H_Sci	17.5	969734	2679	IN-CTX-MGE2	IN-CTX-MGE2	H_IN-CTX-MGE
S85.D2	H_Sci	17.5	973574	2637	IN-CTX-MGE2	IN-CTX-MGE2	H_IN-CTX-MGE
S86.A4	H_Sci	17.5	974374	2513	IN-CTX-MGE2	IN-CTX-MGE2	H_IN-CTX-MGE
S87.C12	H_Sci	17.5	974277	1619	IN-CTX-MGE2	IN-CTX-MGE2	H_IN-CTX-MGE
S88.C3	H_Sci	13	984965	2981	IN-CTX-MGE2	IN-CTX-MGE2	H_IN-CTX-MGE
S91.G5	H_Sci	16	981854	2054	IN-CTX-MGE2	IN-CTX-MGE2	H_IN-CTX-MGE
S91.C10	H_Sci	16	977673	2346	IN-CTX-MGE2	IN-CTX-MGE2	H_IN-CTX-MGE
S92.C9	H_Sci	16.5	965819	1252	IN-CTX-MGE2	IN-CTX-MGE2	H_IN-CTX-MGE
S95.F10	H_Sci	13	975402	2542	IN-CTX-MGE2	IN-CTX-MGE2	H_IN-CTX-MGE
S95.A11	H_Sci	13	977480	2165	IN-CTX-MGE2	IN-CTX-MGE2	H_IN-CTX-MGE
S95.E11	H_Sci	13	977188	2103	IN-CTX-MGE2	IN-CTX-MGE2	H_IN-CTX-MGE
S96.F5	H_Sci	14	978441	1956	IN-CTX-MGE2	IN-CTX-MGE2	H_IN-CTX-MGE
S113.D1	H_Sci	21.5	982854	1166	IN-CTX-MGE2	IN-CTX-MGE2	H_IN-CTX-MGE
S113.G2	H_Sci	21.5	974909	2197	IN-CTX-MGE2	IN-CTX-MGE2	H_IN-CTX-MGE
S113.A6	H_Sci	21.5	983150	1350	IN-CTX-MGE2	IN-CTX-MGE2	H_IN-CTX-MGE
S113.C6	H_Sci	21.5	978062	1598	IN-CTX-MGE2	IN-CTX-MGE2	H_IN-CTX-MGE
S113.A7	H_Sci	21.5	974179	1455	IN-CTX-MGE2	IN-CTX-MGE2	H_IN-CTX-MGE
S113.C8	H_Sci	21.5	975750	3235	IN-CTX-MGE2	IN-CTX-MGE2	H_IN-CTX-MGE
S113.C9	H_Sci	21.5	962192	1039	IN-CTX-MGE2	IN-CTX-MGE2	H_IN-CTX-MGE
S114.F4	H_Sci	22	981235	1831	IN-CTX-MGE2	IN-CTX-MGE2	H_IN-CTX-MGE
S114.F6	H_Sci	22	978636	2809	IN-CTX-MGE2	IN-CTX-MGE2	H_IN-CTX-MGE
S115.C4	H_Sci	22	980816	3668	IN-CTX-MGE2	IN-CTX-MGE2	H_IN-CTX-MGE
S116.G6	H_Sci	22	976104	1761	IN-CTX-MGE2	IN-CTX-MGE2	H_IN-CTX-MGE
S140.D8	H_Sci	20	976000	1562	IN-CTX-MGE2	IN-CTX-MGE2	H_IN-CTX-MGE
S162.C6	H_Sci	23	982668	1155	IN-CTX-MGE2	IN-CTX-MGE2	H_IN-CTX-MGE
S189.E11	H_Sci	8	971862	1738	IN-CTX-MGE2	IN-CTX-MGE2	H_IN-CTX-MGE
O1.E3	H_Sci	18.5	968193	2432	Mural	Mural	H_Mural
S4.E4	H_Sci	14.5	960438	2769	Mural	Mural	H_Mural
S16.C2	H_Sci	13	977604	2016	Mural	Mural	H_Mural
S20.F11	H_Sci	14.2	974579	3274	Mural	Mural	H_Mural
S32.D12	H_Sci	32	972482	3464	Mural	Mural	H_Mural
S35.E6	H_Sci	15	973478	2276	Mural	Mural	H_Mural
S35.G7	H_Sci	15	974483	2373	Mural	Mural	H_Mural
S35.E8	H_Sci	15	976839	2133	Mural	Mural	H_Mural
S35.D9	H_Sci	15	982560	2117	Mural	Mural	H_Mural
S45.D9	H_Sci	21.5	969861	3107	Mural	Mural	H_Mural
S47.B4	H_Sci	21.5	976062	3297	Mural	Mural	H_Mural
S47.D5	H_Sci	21.5	970140	2519	Mural	Mural	H_Mural
S47.E5	H_Sci	21.5	980571	3648	Mural	Mural	H_Mural
S50.G6	H_Sci	37	974581	3045	Mural	Mural	H_Mural
S83.H5	H_Sci	11.5	977253	4752	Mural	Mural	H_Mural
S88.E6	H_Sci	13	979618	3599	Mural	Mural	H_Mural
S91.B8	H_Sci	16	966869	2370	Mural	Mural	H_Mural
S96.B1	H_Sci	14	977800	3207	Mural	Mural	H_Mural
S115.B4	H_Sci	22	977435	3508	Mural	Mural	H_Mural
O1.F4	H_Sci	18.5	982111	2619	IPC-nEN3	IPC-nEN3	H_IPC-nEN
O1.G5	H_Sci	18.5	979831	3144	IPC-nEN3	IPC-nEN3	H_IPC-nEN
O1.H12	H_Sci	18.5	985998	2741	IPC-nEN3	IPC-nEN3	H_IPC-nEN
O2.A3	H_Sci	18.5	974906	2914	IPC-nEN3	IPC-nEN3	H_IPC-nEN
O2.A4	H_Sci	18.5	970327	3301	IPC-nEN3	IPC-nEN3	H_IPC-nEN
O2.C6	H_Sci	18.5	975318	3523	IPC-nEN3	IPC-nEN3	H_IPC-nEN
O2.F9	H_Sci	18.5	979983	2836	IPC-nEN3	IPC-nEN3	H_IPC-nEN
O4.C8	H_Sci	14	985453	2988	IPC-nEN3	IPC-nEN3	H_IPC-nEN
O7.F1	H_Sci	14.7	975016	2967	IPC-nEN3	IPC-nEN3	H_IPC-nEN
O7.D4	H_Sci	14.7	978991	2612	IPC-nEN3	IPC-nEN3	H_IPC-nEN
O7.A8	H_Sci	14.7	978319	4127	IPC-nEN3	IPC-nEN3	H_IPC-nEN
O7.A9	H_Sci	14.7	978394	2684	IPC-nEN3	IPC-nEN3	H_IPC-nEN
O9.D1	H_Sci	14.7	971769	1714	IPC-nEN3	IPC-nEN3	H_IPC-nEN
O9.D12	H_Sci	14.7	981094	3433	IPC-nEN3	IPC-nEN3	H_IPC-nEN
O10.E1	H_Sci	14.7	980902	3196	IPC-nEN3	IPC-nEN3	H_IPC-nEN
O12.G8	H_Sci	22	973165	2965	IPC-nEN3	IPC-nEN3	H_IPC-nEN
O12.B12	H_Sci	14.7	974556	2609	IPC-nEN3	IPC-nEN3	H_IPC-nEN
S3.G1	H_Sci	14.5	984432	2476	IPC-nEN3	IPC-nEN3	H_IPC-nEN
S17.A1	H_Sci	13	985942	2085	IPC-nEN3	IPC-nEN3	H_IPC-nEN
S19.A6	H_Sci	14.2	977880	3283	IPC-nEN3	IPC-nEN3	H_IPC-nEN
S21.A5	H_Sci	14.2	982685	3114	IPC-nEN3	IPC-nEN3	H_IPC-nEN
S24.D9	H_Sci	13.3	985533	2787	IPC-nEN3	IPC-nEN3	H_IPC-nEN
S36.E11	H_Sci	16.3	980348	3724	IPC-nEN3	IPC-nEN3	H_IPC-nEN
S38.D4	H_Sci	16.3	978077	3190	IPC-nEN3	IPC-nEN3	H_IPC-nEN
S38.E7	H_Sci	16.3	980867	3526	IPC-nEN3	IPC-nEN3	H_IPC-nEN
S42.H11	H_Sci	18.5	972626	3489	IPC-nEN3	IPC-nEN3	H_IPC-nEN
S51.E3	H_Sci	14.5	961941	2490	IPC-nEN3	IPC-nEN3	H_IPC-nEN
S56.A2	H_Sci	13	968689	2985	IPC-nEN3	IPC-nEN3	H_IPC-nEN
S82.G1	H_Sci	11.5	978417	2552	IPC-nEN3	IPC-nEN3	H_IPC-nEN
S82.G10	H_Sci	11.5	980792	2989	IPC-nEN3	IPC-nEN3	H_IPC-nEN
S92.G7	H_Sci	16.5	964482	1656	IPC-nEN3	IPC-nEN3	H_IPC-nEN
S93.B1	H_Sci	16.5	974863	3971	IPC-nEN3	IPC-nEN3	H_IPC-nEN
S93.B6	H_Sci	13	982181	3297	IPC-nEN3	IPC-nEN3	H_IPC-nEN
S93.H6	H_Sci	13	983377	4044	IPC-nEN3	IPC-nEN3	H_IPC-nEN
S93.B9	H_Sci	13	981424	4637	IPC-nEN3	IPC-nEN3	H_IPC-nEN
S93.B10	H_Sci	13	978289	4134	IPC-nEN3	IPC-nEN3	H_IPC-nEN
S140.C3	H_Sci	20	974551	3215	IPC-nEN3	IPC-nEN3	H_IPC-nEN
S140.C6	H_Sci	20	960055	2964	IPC-nEN3	IPC-nEN3	H_IPC-nEN
S140.A10	H_Sci	20	980535	2891	IPC-nEN3	IPC-nEN3	H_IPC-nEN
O1.B5	H_Sci	18.5	979054	2299	IN-CTX-MGE1	IN-CTX-MGE1	H_IN-CTX-MGE
O1.E5	H_Sci	18.5	971871	2096	IN-CTX-MGE1	IN-CTX-MGE1	H_IN-CTX-MGE
O1.B8	H_Sci	18.5	970355	1689	IN-CTX-MGE1	IN-CTX-MGE1	H_IN-CTX-MGE
O2.C4	H_Sci	18.5	975908	2482	IN-CTX-MGE1	IN-CTX-MGE1	H_IN-CTX-MGE
O2.B8	H_Sci	18.5	974624	2775	IN-CTX-MGE1	IN-CTX-MGE1	H_IN-CTX-MGE
O4.F1	H_Sci	14	977614	1711	IN-CTX-MGE1	IN-CTX-MGE1	H_IN-CTX-MGE
O4.F5	H_Sci	14	974803	2262	IN-CTX-MGE1	IN-CTX-MGE1	H_IN-CTX-MGE
O4.D12	H_Sci	14	977968	2387	IN-CTX-MGE1	IN-CTX-MGE1	H_IN-CTX-MGE
O7.D5	H_Sci	14.7	978380	2211	IN-CTX-MGE1	IN-CTX-MGE1	H_IN-CTX-MGE
O9.A2	H_Sci	14.7	980382	2613	IN-CTX-MGE1	IN-CTX-MGE1	H_IN-CTX-MGE
O9.F2	H_Sci	14.7	983912	2415	IN-CTX-MGE1	IN-CTX-MGE1	H_IN-CTX-MGE
O9.G2	H_Sci	14.7	979687	2258	IN-CTX-MGE1	IN-CTX-MGE1	H_IN-CTX-MGE
O9.C3	H_Sci	14.7	976586	2391	IN-CTX-MGE1	IN-CTX-MGE1	H_IN-CTX-MGE
O9.E5	H_Sci	14.7	981692	2339	IN-CTX-MGE1	IN-CTX-MGE1	H_IN-CTX-MGE
O9.G6	H_Sci	14.7	973921	2117	IN-CTX-MGE1	IN-CTX-MGE1	H_IN-CTX-MGE
O9.E7	H_Sci	14.7	966663	2015	IN-CTX-MGE1	IN-CTX-MGE1	H_IN-CTX-MGE
O9.C9	H_Sci	14.7	980717	2227	IN-CTX-MGE1	IN-CTX-MGE1	H_IN-CTX-MGE
O9.E9	H_Sci	14.7	970075	2117	IN-CTX-MGE1	IN-CTX-MGE1	H_IN-CTX-MGE
O9.B10	H_Sci	14.7	981299	2644	IN-CTX-MGE1	IN-CTX-MGE1	H_IN-CTX-MGE
O9.E10	H_Sci	14.7	982249	2031	IN-CTX-MGE1	IN-CTX-MGE1	H_IN-CTX-MGE
O9.F10	H_Sci	14.7	977668	2465	IN-CTX-MGE1	IN-CTX-MGE1	H_IN-CTX-MGE
O9.D11	H_Sci	14.7	981532	2530	IN-CTX-MGE1	IN-CTX-MGE1	H_IN-CTX-MGE
O10.F2	H_Sci	14.7	976604	2061	IN-CTX-MGE1	IN-CTX-MGE1	H_IN-CTX-MGE
O10.A9	H_Sci	14.7	977923	2601	IN-CTX-MGE1	IN-CTX-MGE1	H_IN-CTX-MGE
O10.B12	H_Sci	14.7	969151	2482	IN-CTX-MGE1	IN-CTX-MGE1	H_IN-CTX-MGE
O10.D12	H_Sci	14.7	978574	2937	IN-CTX-MGE1	IN-CTX-MGE1	H_IN-CTX-MGE
O12.G3	H_Sci	14	959304	1643	IN-CTX-MGE1	IN-CTX-MGE1	H_IN-CTX-MGE
O12.E5	H_Sci	14	967213	1658	IN-CTX-MGE1	IN-CTX-MGE1	H_IN-CTX-MGE
O12.G5	H_Sci	14	972742	1591	IN-CTX-MGE1	IN-CTX-MGE1	H_IN-CTX-MGE
O12.D6	H_Sci	14	973702	1910	IN-CTX-MGE1	IN-CTX-MGE1	H_IN-CTX-MGE
O12.F6	H_Sci	14	986291	1987	IN-CTX-MGE1	IN-CTX-MGE1	H_IN-CTX-MGE
O12.A7	H_Sci	14	961285	1720	IN-CTX-MGE1	IN-CTX-MGE1	H_IN-CTX-MGE
O12.C7	H_Sci	14	975938	2017	IN-CTX-MGE1	IN-CTX-MGE1	H_IN-CTX-MGE
O12.D8	H_Sci	22	967831	1665	IN-CTX-MGE1	IN-CTX-MGE1	H_IN-CTX-MGE
O12.G9	H_Sci	22	982394	2573	IN-CTX-MGE1	IN-CTX-MGE1	H_IN-CTX-MGE
O12.H9	H_Sci	22	981881	2483	IN-CTX-MGE1	IN-CTX-MGE1	H_IN-CTX-MGE
O12.G10	H_Sci	22	979048	2648	IN-CTX-MGE1	IN-CTX-MGE1	H_IN-CTX-MGE
S3.E4	H_Sci	14.5	977107	2118	IN-CTX-MGE1	IN-CTX-MGE1	H_IN-CTX-MGE
S3.A7	H_Sci	14.5	982591	1783	IN-CTX-MGE1	IN-CTX-MGE1	H_IN-CTX-MGE
S3.F8	H_Sci	14.5	963921	2032	IN-CTX-MGE1	IN-CTX-MGE1	H_IN-CTX-MGE
S14.H11	H_Sci	19	974427	2214	IN-CTX-MGE1	IN-CTX-MGE1	H_IN-CTX-MGE
S15.F8	H_Sci	13	980222	1705	IN-CTX-MGE1	IN-CTX-MGE1	H_IN-CTX-MGE
S15.A9	H_Sci	13	977966	2175	IN-CTX-MGE1	IN-CTX-MGE1	H_IN-CTX-MGE
S15.F9	H_Sci	13	973339	2147	IN-CTX-MGE1	IN-CTX-MGE1	H_IN-CTX-MGE
S15.A10	H_Sci	13	979604	1661	IN-CTX-MGE1	IN-CTX-MGE1	H_IN-CTX-MGE
S15.B10	H_Sci	13	984481	1842	IN-CTX-MGE1	IN-CTX-MGE1	H_IN-CTX-MGE
S15.C12	H_Sci	13	974873	1978	IN-CTX-MGE1	IN-CTX-MGE1	H_IN-CTX-MGE
S15.H12	H_Sci	13	973805	2207	IN-CTX-MGE1	IN-CTX-MGE1	H_IN-CTX-MGE
S16.A2	H_Sci	13	976196	1794	IN-CTX-MGE1	IN-CTX-MGE1	H_IN-CTX-MGE
S16.G2	H_Sci	13	971702	1905	IN-CTX-MGE1	IN-CTX-MGE1	H_IN-CTX-MGE
S16.H2	H_Sci	13	975010	2370	IN-CTX-MGE1	IN-CTX-MGE1	H_IN-CTX-MGE
S16.G5	H_Sci	13	984612	2600	IN-CTX-MGE1	IN-CTX-MGE1	H_IN-CTX-MGE
S16.B6	H_Sci	13	982177	2038	IN-CTX-MGE1	IN-CTX-MGE1	H_IN-CTX-MGE
S17.E3	H_Sci	13	971717	2325	IN-CTX-MGE1	IN-CTX-MGE1	H_IN-CTX-MGE
S17.G6	H_Sci	13	982699	2706	IN-CTX-MGE1	IN-CTX-MGE1	H_IN-CTX-MGE
S17.D7	H_Sci	13	980781	2558	IN-CTX-MGE1	IN-CTX-MGE1	H_IN-CTX-MGE
S17.B12	H_Sci	19	977890	2590	IN-CTX-MGE1	IN-CTX-MGE1	H_IN-CTX-MGE
S17.G12	H_Sci	19	975326	2482	IN-CTX-MGE1	IN-CTX-MGE1	H_IN-CTX-MGE
[truncated: 30,907 more rows]

## Sheet: B. Human_clustermarkers_Science
p_val	avg_diff	pct.1	pct.2	cluster	gene	Cluster markers used for calculating genescore were obtained from Nowakowski et al., 2017 (sm-tables-s1-11).
0.0075689	0.257713	0.5	0.27	Astrocyte	OPHN1
6.47e-07	0.269954	0.37	0.096	Astrocyte	RHOC
0.00215567	0.278606	0.587	0.349	Astrocyte	KIAA1033
0.00220444	0.282229	0.413	0.174	Astrocyte	COL6A1
0.00279372	0.286548	1	0.927	Astrocyte	HNRNPA2B1
0.00209417	0.297997	0.565	0.298	Astrocyte	COL11A1
0.00898713	0.308805	0.696	0.478	Astrocyte	PKM
2.01e-07	0.31013	0.391	0.088	Astrocyte	LRP1B
4.79e-06	0.313161	0.543	0.198	Astrocyte	RP11.270C12.3
8.89e-05	0.321689	0.457	0.169	Astrocyte	CAMK2G
0.000252549	0.328217	0.261	0.063	Astrocyte	HLA.C
0.00490666	0.328325	0.717	0.497	Astrocyte	SRPK2
0.00474668	0.32913	0.37	0.165	Astrocyte	LRRN3
0.0005519	0.329454	0.609	0.314	Astrocyte	LRP1
5.73e-05	0.330238	0.957	0.938	Astrocyte	WSB1
9.57e-06	0.338129	0.63	0.481	Astrocyte	RP11.734J24.1
0.000276487	0.339481	0.348	0.11	Astrocyte	CYP51A1P2
2.5e-07	0.341281	0.913	0.575	Astrocyte	SYT11
0.000410438	0.342726	0.37	0.127	Astrocyte	AHCYL2
0.00883121	0.347933	0.457	0.237	Astrocyte	TACC1
0.000125517	0.361976	0.348	0.106	Astrocyte	BMP7
2.98e-06	0.366524	0.391	0.104	Astrocyte	IL33
4.06e-05	0.368781	0.283	0.06	Astrocyte	RGMA
7.79e-07	0.376125	0.283	0.076	Astrocyte	MTND4P24
0.00166359	0.376348	0.543	0.281	Astrocyte	POLR2L
0.00232219	0.378601	0.761	0.543	Astrocyte	LARS
0.00179669	0.379141	0.652	0.378	Astrocyte	MRFAP1
0.00352179	0.382391	0.5	0.253	Astrocyte	NDRG4
0.00209188	0.390771	0.413	0.188	Astrocyte	MLEC
0.00185611	0.40079	0.978	0.957	Astrocyte	MT.CYB
0.0046103	0.404099	0.978	0.946	Astrocyte	CTNNB1
0.0094549	0.407005	0.13	0.32	Astrocyte	CERS6
0.00069711	0.408477	0.696	0.397	Astrocyte	RP11.553L6.5
0.0084665	0.410822	0.457	0.252	Astrocyte	USP46
0.000324392	0.415091	0.543	0.279	Astrocyte	NBPF8
0.000496132	0.416777	0.5	0.217	Astrocyte	BMPR1A
0.00302461	0.421259	0.5	0.243	Astrocyte	NDUFB5
0.00377692	0.430225	0.391	0.184	Astrocyte	ZNF678
0.00011069	0.43287	0.63	0.363	Astrocyte	PPIB
0.000524237	0.434342	0.609	0.312	Astrocyte	PAX6
0.00626558	0.439347	0.37	0.173	Astrocyte	PRTFDC1
1.4e-05	0.443765	0.37	0.116	Astrocyte	MEGF10
0.00052275	0.44676	0.261	0.068	Astrocyte	SMOC1
3.46e-06	0.448407	0.587	0.228	Astrocyte	TMEM132B
0.000292992	0.457667	0.413	0.148	Astrocyte	IGFBP2
0.00249514	0.467235	0.413	0.187	Astrocyte	GRIA4
2.88e-09	0.471196	0.522	0.135	Astrocyte	LGALS1
0.000203289	0.471473	0.565	0.556	Astrocyte	ZMYM2
0.00181999	0.474877	0.696	0.423	Astrocyte	AC240274.1
9.3e-08	0.475536	0.978	0.996	Astrocyte	MALAT1
2.16e-06	0.477149	0.478	0.148	Astrocyte	CDCA7L
7.76e-06	0.48506	0.304	0.064	Astrocyte	HLA.B
0.00893737	0.485842	0.217	0.416	Astrocyte	MMP16
0.00580957	0.487215	0.413	0.208	Astrocyte	PNPT1
4.04e-09	0.491444	0.435	0.087	Astrocyte	NKAIN4
0.00253266	0.492511	0.783	0.617	Astrocyte	FOS
2.33e-05	0.494843	0.304	0.08	Astrocyte	BEND7
0.00106424	0.495278	0.5	0.229	Astrocyte	PCDH17
0.000239541	0.497755	0.804	0.507	Astrocyte	FABP5P7
7.11e-06	0.506167	0.891	0.568	Astrocyte	FABP5
0.00542229	0.509788	0.348	0.14	Astrocyte	CYR61
0.0036732	0.513071	0.783	0.533	Astrocyte	PRDX1
0.00161424	0.513241	0.783	0.577	Astrocyte	HSPA1A
0.0012944	0.514535	0.63	0.372	Astrocyte	CASC4
2.1e-06	0.51549	0.457	0.138	Astrocyte	LAPTM4B
0.0036679	0.515835	0.261	0.084	Astrocyte	GSTM4
8.13e-12	0.519928	0.261	0.015	Astrocyte	TRIM47
0.00441074	0.521417	0.804	0.635	Astrocyte	PTPRD
0.000506688	0.522567	0.826	0.555	Astrocyte	HSP90B1
0.00639102	0.523865	0.63	0.402	Astrocyte	SMC5
0.0057498	0.523998	0.565	0.334	Astrocyte	MRPS5
0.00276561	0.529864	0.5	0.247	Astrocyte	MEST
1.74e-05	0.534485	0.5	0.199	Astrocyte	SEPT7P9
8.85e-06	0.536249	0.652	0.42	Astrocyte	CHP1
0.000196165	0.537263	0.543	0.239	Astrocyte	RNF13
0.00255728	0.538228	0.826	0.573	Astrocyte	TMEM66
0.00581199	0.545425	0.304	0.136	Astrocyte	CREM
0.000319292	0.546062	0.978	0.879	Astrocyte	EEF1A1P6
0.000655976	0.547547	0.652	0.359	Astrocyte	ACOX1
0.000218934	0.553895	0.283	0.079	Astrocyte	SEPP1
0.000760999	0.564712	0.739	0.447	Astrocyte	ZBTB20
9.37e-11	0.565606	0.848	0.354	Astrocyte	SOX2
1.91e-05	0.566916	0.565	0.226	Astrocyte	NLGN1
0.0008717	0.567235	0.587	0.44	Astrocyte	RP11.16F15.2
3.86e-05	0.583063	0.435	0.142	Astrocyte	OLFM2
0.00219077	0.587994	0.304	0.116	Astrocyte	CXXC5
3.01e-05	0.58844	0.522	0.214	Astrocyte	PHLPP1
0.000822149	0.589575	0.783	0.489	Astrocyte	FMNL2
0.00192345	0.594215	0.457	0.205	Astrocyte	BBS2
2.63e-05	0.594863	0.826	0.508	Astrocyte	ENO1
0.000152918	0.595784	0.717	0.392	Astrocyte	LSAMP
0.00272836	0.605347	0.543	0.294	Astrocyte	MAPK1
0.000273388	0.608679	0.304	0.084	Astrocyte	ZIC5
0.00662441	0.609595	0.978	0.98	Astrocyte	MT.ND4
0.00223362	0.616059	0.261	0.078	Astrocyte	ADAMTS6
0.00792402	0.617947	0.783	0.546	Astrocyte	RHOA
0.00258871	0.621404	0.5	0.361	Astrocyte	RNPC3
0.00658701	0.621686	0.522	0.303	Astrocyte	TOB2
2.22e-06	0.622993	0.565	0.212	Astrocyte	TRPS1
0.00130501	0.624594	0.283	0.082	Astrocyte	ADI1
0.00758224	0.628634	0.587	0.344	Astrocyte	MAGI1
0.00927625	0.631613	0.891	0.714	Astrocyte	LDHB
3.72e-05	0.636742	0.826	0.495	Astrocyte	AC253572.1
0.000443247	0.639147	0.652	0.348	Astrocyte	NTRK3
0.00132944	0.64811	0.783	0.507	Astrocyte	PSAP
0.000752611	0.650938	0.304	0.099	Astrocyte	NOTCH1
0.00363816	0.656426	0.543	0.347	Astrocyte	TEAD1
0.00845025	0.660114	0.391	0.175	Astrocyte	CNDP2
0.00148635	0.661072	0.283	0.089	Astrocyte	CYP51A1P1
0.00173058	0.672915	0.326	0.124	Astrocyte	ZNF521
1.39e-09	0.676542	0.739	0.302	Astrocyte	VIM
0.00949165	0.677125	0.326	0.132	Astrocyte	PAQR7
0.000143467	0.677513	0.565	0.303	Astrocyte	FADS2
0.000293969	0.677736	0.304	0.082	Astrocyte	DNASE2
0.00015082	0.678361	0.565	0.258	Astrocyte	STAT3
7.34e-05	0.681034	0.304	0.079	Astrocyte	SEPT7P3
3.36e-09	0.683337	0.63	0.193	Astrocyte	LRRN1
0.000248423	0.687348	0.37	0.119	Astrocyte	ITPK1
0.000985319	0.693826	0.5	0.232	Astrocyte	C14orf1
0.000118741	0.694846	0.283	0.067	Astrocyte	SLC18B1
4.41e-05	0.695434	0.63	0.29	Astrocyte	CAMK2D
0.00621804	0.699567	0.283	0.104	Astrocyte	SERPINH1
0.000371218	0.710008	0.522	0.241	Astrocyte	ABCD3
2.88e-07	0.710733	0.935	0.929	Astrocyte	MT.ATP8
0.00126519	0.712393	0.957	0.862	Astrocyte	PNISR
0.00380703	0.714439	0.326	0.123	Astrocyte	PTCH1
8.35e-14	0.715746	0.587	0.117	Astrocyte	FKBP10
0.000134017	0.719144	0.283	0.067	Astrocyte	GRAMD1C
0.0039963	0.723001	0.717	0.469	Astrocyte	SELK
0.000111368	0.724464	0.804	0.479	Astrocyte	NTM
6.47e-08	0.72947	0.848	0.422	Astrocyte	RASSF2
0.00622422	0.730824	0.261	0.138	Astrocyte	SYPL1
7.43e-05	0.736342	0.804	0.482	Astrocyte	PCDH9
0.000517665	0.751433	0.413	0.163	Astrocyte	LTBP1
0.00132007	0.757338	0.413	0.19	Astrocyte	FAM120A
4.16e-08	0.761255	0.891	0.57	Astrocyte	GOLIM4
0.00493248	0.761266	0.413	0.186	Astrocyte	RHBDD2
1.07e-06	0.761485	0.261	0.035	Astrocyte	ACSS1
0.00275655	0.764089	0.652	0.406	Astrocyte	SEMA6A
5.62e-05	0.772345	0.761	0.44	Astrocyte	DAD1
0.00962209	0.77246	0.413	0.287	Astrocyte	NDUFB3
3.39e-07	0.77365	0.87	0.742	Astrocyte	DST
0.00462485	0.774942	0.37	0.158	Astrocyte	PSENEN
0.00293369	0.775006	0.63	0.362	Astrocyte	RNF216P1
6.51e-05	0.77579	0.761	0.446	Astrocyte	GABPB1.AS1
0.00283523	0.775842	0.348	0.13	Astrocyte	LAP3
0.000100761	0.778996	0.717	0.404	Astrocyte	ITM2B
0.00807655	0.779556	0.63	0.415	Astrocyte	ARHGAP5
0.000601149	0.782545	0.413	0.303	Astrocyte	TTC14
0.00255659	0.789738	0.304	0.124	Astrocyte	AGPAT3
0.00236935	0.795803	0.391	0.169	Astrocyte	MLLT6
0.00351195	0.797203	0.435	0.195	Astrocyte	PRKD1
0.00648481	0.804014	0.283	0.108	Astrocyte	COG2
0.00181098	0.805969	0.565	0.375	Astrocyte	PTPRA
1.39e-07	0.806071	0.565	0.178	Astrocyte	NEAT1
0.00858757	0.807906	0.326	0.143	Astrocyte	NLGN3
1.31e-05	0.811854	0.804	0.754	Astrocyte	APC
4.38e-05	0.813427	0.37	0.103	Astrocyte	IQSEC1
4.24e-10	0.815249	1	0.722	Astrocyte	NRXN1
0.00363263	0.816659	0.457	0.215	Astrocyte	DPP8
0.00223854	0.818019	0.5	0.245	Astrocyte	ZDHHC21
3.94e-05	0.818287	0.652	0.314	Astrocyte	RIN2
8.49e-05	0.82707	0.522	0.211	Astrocyte	NBPF10
0.00090719	0.827828	0.435	0.206	Astrocyte	IFT88
0.000125848	0.835236	0.435	0.153	Astrocyte	VEGFA
0.00644381	0.840611	0.391	0.176	Astrocyte	ZNF639
0.00106924	0.84156	0.457	0.212	Astrocyte	TXNIP
8.22e-06	0.842228	0.696	0.335	Astrocyte	NBPF25P
7.08e-07	0.846563	0.478	0.134	Astrocyte	HLA.A
1.08e-06	0.848695	0.565	0.198	Astrocyte	NCKAP5
0.00219889	0.850394	0.5	0.258	Astrocyte	IFNAR1
0.00090195	0.850707	0.326	0.111	Astrocyte	FUT11
0.00203583	0.853631	0.543	0.293	Astrocyte	ABI1
0.00226098	0.853817	0.543	0.285	Astrocyte	FERMT2
1.86e-05	0.855194	0.348	0.087	Astrocyte	CSMD1
0.000581544	0.855729	0.543	0.257	Astrocyte	TMEM106B
0.000105118	0.860698	0.63	0.315	Astrocyte	FUT9
0.000220488	0.863338	0.543	0.239	Astrocyte	HADHB
0.000331836	0.866832	0.37	0.121	Astrocyte	IFI6
0.000223533	0.867166	0.37	0.144	Astrocyte	ST3GAL5
0.00506897	0.869243	0.435	0.204	Astrocyte	PSMD10
0.00149136	0.876242	0.261	0.072	Astrocyte	CTD.2282P23.2
0.00211852	0.877658	0.435	0.195	Astrocyte	LPIN2
0.000661508	0.878157	0.391	0.141	Astrocyte	ZNF621
6.58e-05	0.882231	0.5	0.205	Astrocyte	PTPN13
0.00191879	0.887456	0.761	0.491	Astrocyte	MED13
0.000580326	0.888837	0.348	0.122	Astrocyte	MAST4
0.000340562	0.894726	0.283	0.075	Astrocyte	B3GNT1
0.000773448	0.896331	0.609	0.336	Astrocyte	LPHN3
5.3e-05	0.896408	0.717	0.414	Astrocyte	TAOK3
0.000248871	0.902134	0.435	0.164	Astrocyte	RNF180
1e-07	0.902208	0.957	0.846	Astrocyte	MT.ND4L
1.9e-05	0.90285	0.261	0.046	Astrocyte	HSPA2
0.000112946	0.904151	0.87	0.729	Astrocyte	NDUFA4
9.99e-09	0.906451	0.283	0.027	Astrocyte	BAI1
4.15e-05	0.90676	0.891	0.664	Astrocyte	SEPT2
0.000319796	0.907801	0.543	0.247	Astrocyte	SEMA6D
0.00088348	0.909057	0.283	0.079	Astrocyte	DPM3
0.000308877	0.914637	0.587	0.298	Astrocyte	GNG5
0.00187281	0.916546	0.674	0.472	Astrocyte	TOMM7
0.00022806	0.917631	0.413	0.145	Astrocyte	RCN1
0.000762485	0.917676	0.522	0.263	Astrocyte	TMEM170A
3e-05	0.918124	0.522	0.2	Astrocyte	DPP6
1.73e-05	0.929469	0.565	0.226	Astrocyte	CACNB2
4e-06	0.929741	0.326	0.065	Astrocyte	MTSS1L
0.00408556	0.93317	0.5	0.251	Astrocyte	MCFD2
0.000611601	0.936095	0.717	0.459	Astrocyte	IDH1
0.00493303	0.93645	0.63	0.46	Astrocyte	JUN
0.00778842	0.941533	0.391	0.185	Astrocyte	PDLIM3
0.00305893	0.94379	0.348	0.143	Astrocyte	HEATR5A
0.00258461	0.945567	0.87	0.648	Astrocyte	SRGAP2B
5.45e-05	0.956112	0.652	0.322	Astrocyte	SESN3
0.00410441	0.956129	0.304	0.108	Astrocyte	METTL8
0.00112414	0.960598	0.283	0.089	Astrocyte	VEGFB
0.00031749	0.96102	0.739	0.429	Astrocyte	SAT1
0.00641565	0.963654	0.543	0.332	Astrocyte	AHCYL1
0.00189165	0.965462	0.587	0.315	Astrocyte	NEK1
1.82e-05	0.96831	0.761	0.409	Astrocyte	SLC35F1
0.000813552	0.968521	0.37	0.13	Astrocyte	SALL2
6.41e-09	0.968732	0.674	0.227	Astrocyte	NPAS3
3.93e-07	0.969488	0.304	0.046	Astrocyte	MT1X
2.64e-11	0.971705	1	0.82	Astrocyte	SEPT7
4e-06	0.972368	0.283	0.048	Astrocyte	FAM212B
1.04e-06	0.975548	0.717	0.36	Astrocyte	ABAT
0.0013591	0.976319	0.457	0.208	Astrocyte	ZNF236
0.00674533	0.977278	0.261	0.097	Astrocyte	IFI27L1
0.00133894	0.984426	0.652	0.375	Astrocyte	CLDND1
0.000554935	0.985068	0.522	0.252	Astrocyte	SCP2
8.47e-08	0.987238	0.63	0.241	Astrocyte	PTAR1
1.23e-05	0.992542	0.609	0.264	Astrocyte	AXL
6.13e-08	0.993296	0.87	0.512	Astrocyte	ITGB8
5.6e-05	0.996348	0.652	0.322	Astrocyte	FHL1
0.000406913	1.00551	0.761	0.484	Astrocyte	FYN
3.33e-07	1.00696	0.696	0.314	Astrocyte	DCLK2
9.47e-06	1.01259	0.761	0.561	Astrocyte	CTD.2031P19.4
0.00227858	1.01577	0.457	0.248	Astrocyte	ITGAV
0.000157615	1.01824	0.5	0.247	Astrocyte	FAM19A5
1.2e-08	1.02226	0.848	0.686	Astrocyte	TMBIM6
0.0033758	1.02498	0.304	0.112	Astrocyte	MCCC2
0.000145173	1.02746	0.5	0.23	Astrocyte	HIBCH
1.72e-06	1.03122	0.891	0.694	Astrocyte	MT.ND3
0.00618667	1.03329	0.326	0.163	Astrocyte	PLXNC1
0.000130788	1.03385	0.609	0.287	Astrocyte	SEL1L3
3.61e-05	1.03452	0.304	0.067	Astrocyte	ECHDC2
2.84e-05	1.03682	0.63	0.298	Astrocyte	DSEL
8.24e-05	1.03998	0.543	0.233	Astrocyte	LIFR
4.26e-05	1.04331	0.717	0.46	Astrocyte	SLC25A5
7.28e-14	1.04352	0.717	0.179	Astrocyte	PCDH10
1.9e-05	1.04487	0.457	0.176	Astrocyte	EFCAB14
0.00727208	1.04578	0.457	0.241	Astrocyte	UGP2
0.00114146	1.04777	0.913	0.826	Astrocyte	GPM6A
1.43e-08	1.04898	0.783	0.529	Astrocyte	MSMO1
0.00445065	1.05063	0.283	0.094	Astrocyte	WWC2
4.21e-09	1.05752	0.457	0.098	Astrocyte	TFPI
7.54e-08	1.06122	0.348	0.221	Astrocyte	RPL41P2
8.94e-06	1.06723	0.565	0.238	Astrocyte	SC5D
9.09e-10	1.0705	0.891	0.656	Astrocyte	HMGCS1
0.00143637	1.07131	0.63	0.357	Astrocyte	HIPK2
9.62e-05	1.07164	0.587	0.265	Astrocyte	ABHD2
0.000269052	1.07425	0.739	0.437	Astrocyte	RHOBTB3
0.00341626	1.07441	0.261	0.078	Astrocyte	RAB13
0.000162376	1.07467	0.63	0.335	Astrocyte	SSR3
0.000942238	1.07624	0.587	0.298	Astrocyte	SNX5
3.59e-06	1.07674	0.848	0.507	Astrocyte	CANX
0.00928762	1.08635	0.261	0.092	Astrocyte	LGALS3BP
0.000164899	1.09217	0.63	0.338	Astrocyte	MYO6
2.61e-09	1.09404	0.37	0.052	Astrocyte	ACSL6
2.39e-13	1.09419	0.674	0.157	Astrocyte	TTYH1
0.00220858	1.09593	0.587	0.331	Astrocyte	TIMP2
1.82e-05	1.09679	0.261	0.046	Astrocyte	NTNG1
7.32e-07	1.09978	0.696	0.313	Astrocyte	DDR1
0.000528292	1.10304	0.652	0.351	Astrocyte	LHX2
0.000979694	1.10335	0.326	0.143	Astrocyte	PCCB
1.78e-15	1.10568	0.804	0.395	Astrocyte	RP5.857K21.11
0.00925731	1.10631	0.261	0.09	Astrocyte	RREB1
0.0036836	1.1087	0.304	0.112	Astrocyte	FJX1
0.000848175	1.10933	0.435	0.178	Astrocyte	TCF7L2
0.000937302	1.11273	0.413	0.186	Astrocyte	UBL3
0.00635973	1.11292	0.326	0.133	Astrocyte	CHKA
0.00128347	1.11442	0.283	0.084	Astrocyte	ABCA3
0.000686605	1.11661	0.391	0.153	Astrocyte	CD81
0.000470343	1.12401	0.674	0.395	Astrocyte	ZFYVE16
0.00226735	1.12802	0.457	0.208	Astrocyte	GSTM2
3.01e-05	1.1308	0.609	0.273	Astrocyte	MPC1
1.68e-05	1.13228	0.478	0.164	Astrocyte	PCDH7
0.0003685	1.13298	0.304	0.088	Astrocyte	SLC2A1
0.00139934	1.13364	0.652	0.404	Astrocyte	SAMD8
1.56e-06	1.13415	0.261	0.071	Astrocyte	TIMP1
0.00113231	1.1364	0.457	0.195	Astrocyte	SNAP23
5.09e-05	1.13678	0.696	0.363	Astrocyte	BBX
0.00350384	1.13786	0.261	0.085	Astrocyte	RP11.15A1.3
0.000386858	1.13946	0.457	0.183	Astrocyte	ZMAT1
3.81e-12	1.14296	0.674	0.204	Astrocyte	SCRG1
2.15e-05	1.14388	0.587	0.27	Astrocyte	SPECC1
1.68e-07	1.14603	0.783	0.365	Astrocyte	AASS
0.00246671	1.15263	0.696	0.45	Astrocyte	CLNS1A
1.8e-05	1.15346	0.435	0.15	Astrocyte	FGFBP3
0.0095074	1.1537	0.435	0.217	Astrocyte	LPP
0.00617326	1.15371	0.326	0.141	Astrocyte	PURB
1.03e-08	1.1595	0.543	0.143	Astrocyte	TAPBP
8.57e-08	1.1606	0.674	0.254	Astrocyte	ANXA5
5.18e-08	1.16411	0.783	0.383	Astrocyte	SOX9
1.08e-08	1.16723	0.717	0.313	Astrocyte	DDAH1
3.71e-06	1.17132	0.739	0.425	Astrocyte	TSPAN3
0.00332824	1.17705	0.348	0.134	Astrocyte	STK17A
0.00086086	1.17817	0.391	0.178	Astrocyte	FAT1
3.98e-07	1.17829	0.478	0.149	Astrocyte	ZIC2
1.93e-13	1.1803	0.717	0.185	Astrocyte	SALL3
0.00011051	1.18309	0.652	0.402	Astrocyte	C3orf70
6.05e-10	1.18576	0.978	0.757	Astrocyte	CNN3
9.28e-05	1.18831	0.326	0.085	Astrocyte	IRF2
0.00049922	1.19195	0.37	0.141	Astrocyte	EPB41L2
0.00588202	1.19679	0.304	0.133	Astrocyte	GAREML
4.26e-06	1.19687	0.478	0.148	Astrocyte	B3GAT2
4.35e-08	1.20341	0.326	0.046	Astrocyte	ENKUR
0.000688193	1.21039	0.261	0.066	Astrocyte	SCN1A
1.39e-05	1.2113	0.63	0.294	Astrocyte	SLC16A1
0.000321508	1.21132	0.5	0.219	Astrocyte	UFL1
1.61e-08	1.21497	0.435	0.098	Astrocyte	GPRC5B
5.73e-06	1.21892	0.348	0.086	Astrocyte	LINC01138
1.61e-11	1.21905	0.87	0.389	Astrocyte	SRI
8.21e-08	1.22564	0.826	0.415	Astrocyte	NOVA1
7.43e-09	1.2261	0.935	0.583	Astrocyte	NBPF14
3.96e-11	1.22679	0.891	0.568	Astrocyte	ID2
0.000167104	1.23219	0.37	0.116	Astrocyte	EFCAB2
2.08e-06	1.2337	0.609	0.266	Astrocyte	JAM2
1.24e-09	1.23651	0.891	0.483	Astrocyte	FABP7
0.00105807	1.23714	0.283	0.081	Astrocyte	NEK6
3.1e-13	1.23866	0.978	0.718	Astrocyte	QKI
2.99e-10	1.24245	0.478	0.088	Astrocyte	MFGE8
0.00140562	1.25198	0.283	0.086	Astrocyte	DLC1
3.29e-06	1.25434	0.522	0.177	Astrocyte	CCDC144CP
0.00234757	1.25802	0.261	0.079	Astrocyte	TNFRSF19
4.76e-07	1.25872	0.783	0.382	Astrocyte	CD63
0.000695428	1.26521	0.587	0.319	Astrocyte	MEIS1
0.000271889	1.27247	0.391	0.134	Astrocyte	PSD2
0.00180402	1.27707	0.478	0.218	Astrocyte	SPATS2L
0.001	1.27869	0.891	0.262	Astrocyte	ZFP36L1
1.96e-13	1.28284	0.913	0.374	Astrocyte	MYO10
7.45e-08	1.28492	0.696	0.278	Astrocyte	TRIM9
2.29e-05	1.28862	0.283	0.056	Astrocyte	GAS1
1.76e-07	1.29886	0.543	0.196	Astrocyte	ARHGAP12
5.7e-10	1.30349	0.457	0.08	Astrocyte	MT2A
0.000555765	1.30429	0.261	0.076	Astrocyte	LAMB2
9.82e-06	1.30443	0.522	0.188	Astrocyte	IVD
0.00395079	1.30988	0.304	0.116	Astrocyte	SCCPDH
4.68e-06	1.31414	0.348	0.076	Astrocyte	HLA.E
0.00673029	1.31512	0.304	0.14	Astrocyte	MAGI2.AS3
0.00112913	1.31626	0.304	0.107	Astrocyte	JAG1
1.92e-05	1.31727	0.457	0.154	Astrocyte	DAG1
3.51e-06	1.31828	0.413	0.112	Astrocyte	AIF1L
1.11e-16	1.32747	0.87	0.304	Astrocyte	B2M
0.00106908	1.33127	0.391	0.16	Astrocyte	PSME2
8.21e-08	1.33329	0.348	0.056	Astrocyte	ADHFE1
2.01e-05	1.33369	0.37	0.132	Astrocyte	SLC25A27
5.89e-07	1.33564	0.63	0.24	Astrocyte	NOTCH2
0.0093939	1.33669	0.37	0.172	Astrocyte	PDXK
0.00362704	1.33717	0.587	0.343	Astrocyte	VPS36
1.05e-08	1.33749	0.587	0.17	Astrocyte	SPRED1
0.001	1.34127	1	0.826	Astrocyte	C1orf61
3.23e-05	1.34233	0.413	0.126	Astrocyte	HS2ST1
0.000722127	1.34439	0.543	0.269	Astrocyte	OAT
1.5e-12	1.34592	0.609	0.271	Astrocyte	MTRNR2L8
2.62e-09	1.34958	0.478	0.098	Astrocyte	ILDR2
0.00499923	1.35162	0.326	0.134	Astrocyte	PEX2
2.49e-08	1.35167	0.261	0.024	Astrocyte	PPP1R3C
2.91e-10	1.36789	0.783	0.395	Astrocyte	NADK2
0.000492776	1.37231	0.478	0.211	Astrocyte	PTPRG
5.94e-13	1.38223	0.543	0.091	Astrocyte	SEPT8
3.83e-08	1.38687	0.283	0.03	Astrocyte	ID1
0.00387926	1.38949	0.652	0.45	Astrocyte	IDI1
9.09e-08	1.39006	0.63	0.224	Astrocyte	IL6ST
0.001	1.39088	0.804	0.25	Astrocyte	LRRC16A
7.06e-05	1.39135	0.391	0.125	Astrocyte	NOTCH3
0.00183289	1.39711	0.37	0.153	Astrocyte	SLC48A1
3.95e-05	1.39818	0.543	0.242	Astrocyte	LIMA1
1.46e-11	1.40196	0.783	0.277	Astrocyte	PHYHIPL
7.51e-09	1.40251	0.5	0.116	Astrocyte	ABLIM1
0.00785218	1.40299	0.283	0.115	Astrocyte	C8orf4
0.00247523	1.40365	0.391	0.17	Astrocyte	ATF7
0.00172182	1.40457	0.326	0.119	Astrocyte	LDLRAD3
0.000423775	1.40467	0.304	0.094	Astrocyte	DGKB
0.000625365	1.40836	0.522	0.312	Astrocyte	ALDH7A1
8.09e-06	1.41288	0.413	0.116	Astrocyte	PLEKHH2
9.42e-06	1.41431	0.413	0.115	Astrocyte	SWAP70
0.000150756	1.41538	0.413	0.152	Astrocyte	HSD17B7P2
1.04e-06	1.42131	0.326	0.06	Astrocyte	KAT2A
0.00789169	1.42292	0.326	0.147	Astrocyte	GPC6
0.00265191	1.42444	0.283	0.093	Astrocyte	OGFRL1
2.94e-06	1.43662	0.543	0.19	Astrocyte	LITAF
0.000308746	1.43873	0.304	0.121	Astrocyte	HIST2H2BE
0.00287383	1.44054	0.261	0.084	Astrocyte	THG1L
1.44e-05	1.44337	0.543	0.24	Astrocyte	CADM2
5.37e-12	1.44444	0.652	0.198	Astrocyte	ETV1
4.19e-09	1.45143	0.435	0.08	Astrocyte	PCDHGC3
0.001	1.45589	0.935	0.474	Astrocyte	MTND4P12
0.00680704	1.45721	0.326	0.14	Astrocyte	SLC35A5
0.000846476	1.46126	0.283	0.079	Astrocyte	GCSH
2.41e-11	1.46333	0.739	0.242	Astrocyte	TJP1
2.7e-07	1.47214	0.804	0.554	Astrocyte	SCD
5.45e-11	1.47511	0.717	0.233	Astrocyte	ADD3
1.82e-09	1.47649	0.457	0.09	Astrocyte	BCHE
0.000449641	1.47687	0.565	0.274	Astrocyte	SPPL2A
5.36e-06	1.47874	0.37	0.09	Astrocyte	GLDC
2.12e-05	1.48458	0.348	0.091	Astrocyte	STK3
3.67e-08	1.48658	0.37	0.061	Astrocyte	CA2
4.53e-05	1.49126	0.457	0.161	Astrocyte	COMT
0.00032325	1.49421	0.261	0.063	Astrocyte	PBXIP1
0.000503939	1.49427	0.304	0.112	Astrocyte	SPRED2
0.00248879	1.50129	0.326	0.124	Astrocyte	DGKH
0.00011802	1.50253	0.478	0.195	Astrocyte	CD99
0.000541012	1.51309	0.283	0.076	Astrocyte	PPARGC1A
2.03e-07	1.5133	0.652	0.275	Astrocyte	SNX3
2.46e-05	1.51918	0.391	0.114	Astrocyte	NOG
0.00293675	1.5211	0.37	0.161	Astrocyte	PDIA3P1
1.01e-11	1.52962	0.543	0.103	Astrocyte	CPT1A
0.000165446	1.53497	0.283	0.069	Astrocyte	CRYL1
3.18e-11	1.53842	0.761	0.304	Astrocyte	TRIB2
9.16e-06	1.54121	0.37	0.095	Astrocyte	HRSP12
0.000261999	1.54185	0.37	0.128	Astrocyte	TGIF1
9.88e-07	1.54209	0.391	0.096	Astrocyte	ALCAM
0.00359807	1.54515	0.283	0.105	Astrocyte	TMEM9B
1.98e-06	1.55242	0.478	0.144	Astrocyte	PIK3R1
9.68e-06	1.55366	0.283	0.056	Astrocyte	NACC2
0.000134903	1.5569	0.522	0.227	Astrocyte	HSD17B12
5.16e-06	1.55863	0.522	0.192	Astrocyte	PHACTR2
1.14e-10	1.55866	0.543	0.115	Astrocyte	SFXN5
4.19e-06	1.56199	0.522	0.177	Astrocyte	PHGDH
5.62e-08	1.56264	0.652	0.277	Astrocyte	NLGN4X
0.00577504	1.56349	0.261	0.138	Astrocyte	EMX2
6.11e-05	1.56486	0.696	0.417	Astrocyte	CTNND2
2.02e-06	1.56816	0.261	0.04	Astrocyte	SLC25A53
0.00175357	1.56931	0.261	0.077	Astrocyte	ABHD4
1.42e-07	1.57224	0.5	0.139	Astrocyte	SPRY2
5.46e-07	1.57549	0.435	0.117	Astrocyte	HSDL2
3.99e-08	1.58267	0.696	0.304	Astrocyte	SCD5
3.72e-08	1.58504	0.913	0.707	Astrocyte	GPM6B
0.00339734	1.59484	0.283	0.097	Astrocyte	PLOD2
2.83e-06	1.59505	0.283	0.045	Astrocyte	LYPD1
4.73e-07	1.60121	0.5	0.147	Astrocyte	CHPT1
1.72e-11	1.60501	0.652	0.186	Astrocyte	SEMA5A
1.22e-05	1.61302	0.261	0.077	Astrocyte	LRRC17
0.00039212	1.61931	0.326	0.097	Astrocyte	ADCY2
3.37e-12	1.62649	0.804	0.281	Astrocyte	IGDCC4
7.75e-13	1.63652	0.761	0.346	Astrocyte	DNER
2.65e-11	1.64034	0.391	0.048	Astrocyte	S100A13
7.58e-05	1.64985	0.5	0.21	Astrocyte	CLSTN1
0.00678339	1.65633	0.413	0.195	Astrocyte	ADCYAP1R1
6.64e-07	1.6603	0.326	0.058	Astrocyte	TNK2
1.33e-15	1.66758	0.652	0.121	Astrocyte	HTRA1
3.34e-08	1.67004	0.5	0.131	Astrocyte	BMPR1B
0.00114358	1.6707	0.283	0.093	Astrocyte	FAM84B
2.4e-12	1.67218	0.739	0.233	Astrocyte	PSAT1
3.55e-09	1.67466	0.63	0.283	Astrocyte	ALDH6A1
4.25e-05	1.67652	0.457	0.163	Astrocyte	ELOVL2
8.92e-07	1.68184	0.457	0.145	Astrocyte	FAM3C
3.07e-07	1.68292	0.413	0.098	Astrocyte	ZMAT3
0.00022455	1.6882	0.457	0.235	Astrocyte	ID4
2.23e-14	1.68888	0.783	0.215	Astrocyte	HES1
1.3e-07	1.69028	0.478	0.125	Astrocyte	DOCK1
9.33e-15	1.69062	0.761	0.195	Astrocyte	ZFP36L2
5.94e-10	1.69768	0.891	0.471	Astrocyte	TLK1
2.83e-11	1.71961	0.63	0.158	Astrocyte	AK4
9.54e-10	1.72178	0.674	0.24	Astrocyte	ETV5
0.00284399	1.72699	0.37	0.158	Astrocyte	ATP9B
2.43e-07	1.72904	0.304	0.043	Astrocyte	LYN
2.94e-06	1.73545	0.348	0.073	Astrocyte	APOL2
1.43e-06	1.73905	0.522	0.181	Astrocyte	WDR41
1.96e-11	1.75299	0.848	0.447	Astrocyte	NCAN
2.04e-05	1.76607	0.413	0.121	Astrocyte	LRP4
1.42e-05	1.76756	0.304	0.062	Astrocyte	KANK1
0.001	1.77229	0.913	0.316	Astrocyte	RFTN2
0.001	1.7755	0.261	0.229	Astrocyte	RP11.492M23.2
0.000845917	1.78101	0.587	0.319	Astrocyte	TMED10
0.001	1.78438	0.913	0.393	Astrocyte	GPR56
2.79e-07	1.7869	0.391	0.08	Astrocyte	FGFR3
3.4e-05	1.80092	0.457	0.18	Astrocyte	GULP1
5.49e-06	1.80133	0.283	0.048	Astrocyte	SNTA1
2.3e-10	1.80204	0.326	0.03	Astrocyte	SLC6A9
1.11e-16	1.80635	0.826	0.249	Astrocyte	CLU
4.55e-08	1.80805	0.261	0.025	Astrocyte	ACSBG1
0.00120591	1.81158	0.37	0.145	Astrocyte	SSFA2
6.04e-09	1.81762	0.565	0.194	Astrocyte	ARHGEF26
2.76e-07	1.82651	0.413	0.093	Astrocyte	PMP22
1.6e-07	1.83185	0.522	0.189	Astrocyte	PDE4B
0.00221981	1.85743	0.283	0.09	Astrocyte	PARP14
2.54e-06	1.86204	0.391	0.096	Astrocyte	PPP2R5A
0.001	1.86437	0.957	0.384	Astrocyte	PTN
1.11e-16	1.86838	0.978	0.612	Astrocyte	PTPRZ1
0.001	1.87352	0.891	0.284	Astrocyte	SDC3
0.000601631	1.8781	0.261	0.067	Astrocyte	PHF11
4.16e-09	1.87835	0.522	0.149	Astrocyte	ITM2C
0.00729946	1.89473	0.283	0.111	Astrocyte	TRAPPC3
1.12e-11	1.89604	0.87	0.58	Astrocyte	CPE
1.11e-15	1.9025	0.761	0.261	Astrocyte	SLITRK2
0.000102067	1.90266	0.283	0.083	Astrocyte	BAALC
8.5e-08	1.90439	0.435	0.096	Astrocyte	S1PR1
0.000197722	1.9063	0.326	0.093	Astrocyte	IMPACT
7.08e-08	1.91667	0.283	0.033	Astrocyte	SOX8
6.66e-10	1.91906	0.609	0.172	Astrocyte	PDLIM5
2.22e-15	1.92612	0.826	0.323	Astrocyte	ZEB1
2.57e-09	1.93043	0.543	0.143	Astrocyte	NTRK2
0.00044684	1.93757	0.413	0.162	Astrocyte	PARD3
2.01e-05	1.94794	0.283	0.057	Astrocyte	ACTN2
3.66e-07	1.94898	0.304	0.047	Astrocyte	ROBO3
1.44e-15	1.95588	0.435	0.035	Astrocyte	OLIG2
2.87e-06	1.96296	0.348	0.073	Astrocyte	RASSF4
1.99e-07	1.97089	0.413	0.115	Astrocyte	GNG12
3.66e-13	1.97149	0.848	0.388	Astrocyte	TSPAN7
8.27e-10	1.97642	0.478	0.107	Astrocyte	RORA
3.34e-07	1.98265	0.522	0.157	Astrocyte	MASP1
8.45e-07	1.99393	0.348	0.069	Astrocyte	RHOJ
6.25e-11	2.01592	0.522	0.101	Astrocyte	ENHO
2.21e-07	2.01645	0.261	0.035	Astrocyte	ARHGAP31
0.00112552	2.01861	0.261	0.074	Astrocyte	ACOT2
1.05e-07	2.02083	0.457	0.109	Astrocyte	MCC
2.73e-05	2.02287	0.435	0.141	Astrocyte	ZC3HAV1
0.00179505	2.02534	0.261	0.076	Astrocyte	ALDH5A1
1.4e-10	2.05514	0.5	0.097	Astrocyte	HEY1
5.11e-15	2.05663	0.674	0.147	Astrocyte	STON2
2.99e-12	2.06295	0.609	0.145	Astrocyte	FAM107A
6.31e-05	2.06323	0.326	0.119	Astrocyte	CADM4
3.33e-16	2.06697	0.696	0.166	Astrocyte	PPAP2B
1.73e-11	2.06988	0.739	0.345	Astrocyte	PEA15
7.45e-11	2.07776	0.543	0.122	Astrocyte	KAT2B
6.9e-07	2.07896	0.37	0.077	Astrocyte	EEPD1
9.75e-14	2.08323	0.87	0.464	Astrocyte	GLUL
0.000579025	2.08385	0.304	0.107	Astrocyte	MAML2
1.22e-10	2.09029	0.457	0.073	Astrocyte	ARHGEF6
6.34e-08	2.09335	0.326	0.047	Astrocyte	BRINP3
2.07e-11	2.09519	0.587	0.134	Astrocyte	SLC6A1
5.62e-07	2.10037	0.261	0.031	Astrocyte	ZIC1
2.74e-11	2.10064	0.565	0.136	Astrocyte	DUSP6
1.86e-12	2.10241	0.478	0.072	Astrocyte	SLC7A11
1.03e-07	2.10732	0.283	0.039	Astrocyte	RP11.263K19.4
1.63e-13	2.11118	0.587	0.105	Astrocyte	NDRG2
6.13e-10	2.11959	0.37	0.058	Astrocyte	PDGFRA
0.001	2.12188	0.717	0.092	Astrocyte	MLC1
9.45e-13	2.14206	0.5	0.077	Astrocyte	SASH1
0.001	2.16212	0.652	0.133	Astrocyte	SERPINE2
6.66e-16	2.17757	0.457	0.038	Astrocyte	SLC25A18
8.94e-12	2.17759	0.587	0.172	Astrocyte	PRNP
8.15e-10	2.18169	0.5	0.107	Astrocyte	METTL7A
3.49e-10	2.19489	0.391	0.054	Astrocyte	PAQR8
0.001	2.19841	0.87	0.277	Astrocyte	PON2
5.55e-10	2.19906	0.478	0.109	Astrocyte	PRCP
3.45e-14	2.20142	0.739	0.302	Astrocyte	GABBR1
1.68e-14	2.20503	0.326	0.016	Astrocyte	MT1E
7.08e-12	2.20717	0.587	0.139	Astrocyte	MAP3K1
0.0036573	2.20833	0.348	0.153	Astrocyte	NRBP2
1.41e-06	2.20969	0.261	0.035	Astrocyte	APCDD1
2.45e-12	2.21172	0.522	0.099	Astrocyte	LRRTM3
8.54e-13	2.21399	0.5	0.107	Astrocyte	LIX1
1.27e-12	2.21794	0.63	0.149	Astrocyte	RFX4
4.41e-09	2.21933	0.326	0.039	Astrocyte	SSPN
0.001	2.22308	0.935	0.307	Astrocyte	SLC1A3
0.001	2.22457	0.848	0.309	Astrocyte	SEZ6L
2.25e-12	2.23936	0.565	0.109	Astrocyte	ITGA6
0.001	2.24066	0.478	0.033	Astrocyte	ABCC9
5.8e-05	2.25336	0.261	0.057	Astrocyte	ACACB
0.000807184	2.26623	0.261	0.075	Astrocyte	ERAP1
0.00536751	2.27007	0.283	0.098	Astrocyte	MYO1E
4.66e-09	2.27256	0.522	0.155	Astrocyte	GRM3
0.001	2.28047	0.804	0.157	Astrocyte	TNC
0.001	2.28311	0.783	0.291	Astrocyte	GLUD1
1.26e-07	2.30409	0.261	0.027	Astrocyte	P2RY1
1.63e-05	2.32313	0.261	0.048	Astrocyte	PARP9
6.08e-11	2.32633	0.348	0.038	Astrocyte	RGCC
1.09e-11	2.32839	0.435	0.063	Astrocyte	CSGALNACT1
3.45e-06	2.34622	0.326	0.09	Astrocyte	PLEKHG1
2e-14	2.37375	0.413	0.034	Astrocyte	TRIL
0.001	2.38388	0.457	0.049	Astrocyte	PMP2
0.001	2.39182	0.783	0.121	Astrocyte	GATM
8.17e-12	2.40034	0.348	0.029	Astrocyte	EFHD2
0.000131411	2.40571	0.348	0.129	Astrocyte	IGFBP5
0.001	2.41677	0.63	0.046	Astrocyte	CCDC80
2.38e-11	2.42995	0.37	0.038	Astrocyte	LINC01351
0.001	2.44499	0.957	0.434	Astrocyte	DBI
1.9e-10	2.45216	0.304	0.024	Astrocyte	ADRB1
1.8e-11	2.46414	0.5	0.101	Astrocyte	ARAP2
5.27e-07	2.46637	0.348	0.066	Astrocyte	BDH2
3.86e-14	2.48056	0.435	0.051	Astrocyte	SLC15A2
7.7e-13	2.49051	0.391	0.036	Astrocyte	SLC38A3
0.001	2.5104	0.87	0.384	Astrocyte	ATP1B2
0.001	2.51267	0.543	0.027	Astrocyte	HEPACAM
0.001	2.53888	0.717	0.17	Astrocyte	LRIG1
8.93e-13	2.54794	0.587	0.143	Astrocyte	ITPR2
1.63e-14	2.55316	0.5	0.066	Astrocyte	SPATA6
0.000131108	2.57091	0.261	0.057	Astrocyte	MTMR10
1.45e-09	2.58531	0.391	0.319	Astrocyte	RPL10AP6
0.001	2.60043	0.935	0.368	Astrocyte	SLC1A2
0.001	2.60277	0.804	0.173	Astrocyte	ATP1A2
1.66e-08	2.61081	0.304	0.045	Astrocyte	SUCLG2
0.001	2.62976	0.63	0.076	Astrocyte	WSCD1
1.06e-11	2.64311	0.391	0.053	Astrocyte	DPF3
1.07e-10	2.65474	0.37	0.041	Astrocyte	GNG7
2.22e-16	2.70147	0.565	0.084	Astrocyte	SLC4A4
6.52e-13	2.72032	0.413	0.042	Astrocyte	ZCCHC24
0.001	2.72502	0.848	0.126	Astrocyte	RAB31
7.26e-07	2.72588	0.283	0.044	Astrocyte	C8orf46
0.001	2.75331	0.543	0.037	Astrocyte	SLC6A11
0.001	2.76394	0.783	0.205	Astrocyte	DTNA
0.001	2.76614	0.848	0.185	Astrocyte	F3
0.001	2.79111	0.717	0.096	Astrocyte	EGFR
4.95e-11	2.82986	0.326	0.029	Astrocyte	IL17RB
0.001	2.87348	0.739	0.094	Astrocyte	HOPX
0.001	2.87936	0.478	0.05	Astrocyte	B3GALTL
3.5e-06	2.88647	0.261	0.051	Astrocyte	TGFB2
0.001	2.91126	0.891	0.124	Astrocyte	BCAN
0.001	2.91942	0.522	0.04	Astrocyte	SPON1
0.001	2.93235	0.435	0.016	Astrocyte	CLDN10
3.86e-08	2.93404	0.304	0.055	Astrocyte	C2orf72
0.001	2.93868	0.674	0.085	Astrocyte	LUZP2
3.8e-14	2.95588	0.413	0.047	Astrocyte	GJA1
2.92e-12	2.96161	0.326	0.022	Astrocyte	LGI1
0.001	2.97892	0.609	0.077	Astrocyte	SLCO1C1
5.79e-06	3.05754	0.261	0.05	Astrocyte	RGS20
0.001	3.06861	0.696	0.037	Astrocyte	ATP13A4
1.27e-14	3.07	0.609	0.125	Astrocyte	LRRC4C
1.86e-09	3.07121	0.261	0.02	Astrocyte	FAM181B
2.22e-16	3.08472	0.478	0.043	Astrocyte	S100A16
0.001	3.10384	0.478	0.04	Astrocyte	SIRPA
1.93e-11	3.12345	0.348	0.037	Astrocyte	KAL1
0.001	3.14679	0.587	0.039	Astrocyte	S100B
0.001	3.1967	0.587	0.044	Astrocyte	EDNRB
0.001	3.25498	0.522	0.032	Astrocyte	OLIG1
0.001	3.25597	0.587	0.062	Astrocyte	GFAP
9.51e-09	3.26407	0.326	0.046	Astrocyte	LINC00943
1.44e-11	3.26949	0.348	0.033	Astrocyte	HAPLN1
0.001	3.27243	0.804	0.148	Astrocyte	CST3
0.001	3.58522	0.478	0.054	Astrocyte	ALDOC
0.001	3.60477	0.652	0.05	Astrocyte	CD9
0.001	3.63388	0.391	0.025	Astrocyte	CXCL14
1.55e-15	3.69271	0.348	0.023	Astrocyte	GRAMD3
0.001	3.76583	0.739	0.081	Astrocyte	DIO2
0.001	3.86629	0.739	0.047	Astrocyte	CSPG5
0.001	3.97396	0.478	0.008	Astrocyte	AC007682.1
6.66e-16	3.97772	0.261	0.006	Astrocyte	ALDH1L1
0.001	4.02148	0.413	0.023	Astrocyte	NPNT
0.001	4.0241	0.783	0.052	Astrocyte	MT3
0.001	4.06324	0.304	0.009	Astrocyte	KCNJ16
0.001	4.13051	0.348	0.004	Astrocyte	LGR6
0.001	4.16284	0.696	0.018	Astrocyte	GPR37L1
0.001	4.3652	0.304	0.005	Astrocyte	AGT
0.001	4.38866	0.413	0.009	Astrocyte	RP11.71N10.1
0.001	4.5233	0.696	0.064	Astrocyte	SPARCL1
0.001	4.66422	0.543	0.032	Astrocyte	AQP4
2.22e-15	4.85873	0.283	0.008	Astrocyte	FGF1
0.00904784	0.252585	0.861	0.645	IPC-div1	ZNF286B
0.0011933	0.2534	0.528	0.228	IPC-div1	WDR76
0.00245986	0.253692	0.389	0.161	IPC-div1	SRR
3.3e-05	0.2541	0.389	0.119	IPC-div1	HMGN2P4
0.000250372	0.256742	0.556	0.325	IPC-div1	SGCE
0.00104287	0.257064	1	0.933	IPC-div1	TMSB10
0.00135772	0.257237	0.861	0.585	IPC-div1	MIDN
0.000691104	0.258631	0.806	0.476	IPC-div1	STRBP
0.00102093	0.260379	0.944	0.76	IPC-div1	TRIM2
0.00147198	0.261085	0.833	0.571	IPC-div1	ROBO2
0.00394451	0.263666	0.556	0.317	IPC-div1	BNIP2
0.000982816	0.264008	0.5	0.368	IPC-div1	C16orf80
1.22e-06	0.264036	0.889	0.489	IPC-div1	BANF1
0.00376305	0.266785	0.833	0.555	IPC-div1	ZBTB18
0.00584086	0.267903	0.528	0.267	IPC-div1	JAM2
0.000229792	0.268339	0.833	0.483	IPC-div1	PRPF8
1.6e-08	0.269044	0.972	0.768	IPC-div1	ADNP
0.00359592	0.269263	0.917	0.769	IPC-div1	DDX6
0.00327258	0.270075	0.639	0.35	IPC-div1	SMARCD1
0.00048987	0.270367	0.639	0.378	IPC-div1	CAMSAP1
0.00266357	0.272803	0.472	0.299	IPC-div1	UNC5D
0.00222626	0.273915	0.611	0.436	IPC-div1	RNF24
0.00218179	0.275427	0.583	0.314	IPC-div1	PPP4R2
0.00578878	0.27571	0.778	0.515	IPC-div1	NUDT4
0.000600987	0.276005	0.472	0.172	IPC-div1	PKP4
2.63e-06	0.276203	0.75	0.376	IPC-div1	RANP1
4.82e-05	0.282559	0.944	0.637	IPC-div1	MEX3A
1.56e-05	0.285408	1	0.827	IPC-div1	ZNF292
0.00018224	0.286251	0.972	0.795	IPC-div1	YBX1
1.09e-05	0.287594	0.639	0.314	IPC-div1	SHISA2
1.63e-05	0.289371	0.667	0.362	IPC-div1	HELLS
0.000575048	0.290793	0.778	0.511	IPC-div1	RPL36AL
0.00486337	0.291166	0.722	0.447	IPC-div1	COX8A
0.000995316	0.292389	0.806	0.488	IPC-div1	MDH1
0.000397305	0.294664	0.889	0.611	IPC-div1	USP11
0.00584344	0.29583	0.389	0.159	IPC-div1	HEG1
6.85e-05	0.297833	0.639	0.345	IPC-div1	ACTR1A
0.00194249	0.299692	0.389	0.162	IPC-div1	FANCM
0.00671087	0.303341	0.917	0.722	IPC-div1	BASP1
0.00100318	0.303778	0.917	0.656	IPC-div1	FUS
7.19e-06	0.304619	0.833	0.546	IPC-div1	RHOA
0.000251376	0.306097	0.806	0.451	IPC-div1	VTA1
0.00473868	0.306762	0.694	0.451	IPC-div1	KIAA0232
4.24e-05	0.308636	0.778	0.49	IPC-div1	TUG1
0.00755343	0.309199	0.556	0.32	IPC-div1	WAPAL
0.000529643	0.309402	0.639	0.426	IPC-div1	OSBPL8
0.000773064	0.309732	0.917	0.65	IPC-div1	PTGES3
0.00876945	0.31071	0.972	0.821	IPC-div1	SEPT7
0.000433107	0.310901	0.75	0.401	IPC-div1	ANP32A
4.9e-06	0.31285	0.639	0.302	IPC-div1	NUMA1
5.12e-05	0.313149	0.944	0.812	IPC-div1	HNRNPC
2.46e-08	0.313168	1	0.846	IPC-div1	GAPDH
0.00344213	0.315596	0.778	0.478	IPC-div1	PKM
6.52e-12	0.31624	1	0.925	IPC-div1	NFIB
9.75e-11	0.316523	1	0.878	IPC-div1	UBB
4.42e-06	0.317587	1	0.736	IPC-div1	LINC00461
0.00475242	0.317809	0.833	0.558	IPC-div1	RP11.396K3.1
0.00211846	0.318405	0.639	0.332	IPC-div1	CALU
0.00289506	0.318808	0.583	0.367	IPC-div1	KIAA1191
0.00640005	0.319256	0.417	0.272	IPC-div1	DANCR
0.0012575	0.319615	0.611	0.3	IPC-div1	POLR2D
4.19e-08	0.321247	0.972	0.919	IPC-div1	H3F3A
0.00516316	0.321772	0.5	0.305	IPC-div1	ARMC1
0.000315133	0.321975	0.694	0.399	IPC-div1	N4BP2
3.41e-09	0.322499	0.917	0.591	IPC-div1	FDFT1
0.000200121	0.322937	0.694	0.349	IPC-div1	PHLDA1
3.95e-07	0.323194	0.917	0.661	IPC-div1	ZC3H13
0.00681345	0.325065	0.472	0.221	IPC-div1	CBX3P9
1.37e-12	0.326829	1	0.976	IPC-div1	STMN1
2.77e-07	0.327477	1	0.992	IPC-div1	PTMA
5.34e-10	0.328639	1	0.969	IPC-div1	TMSB4X
0.000396463	0.329894	0.583	0.255	IPC-div1	C2orf69
0.00315979	0.33	0.75	0.465	IPC-div1	SNX6
8.04e-05	0.331017	0.278	0.052	IPC-div1	RP11.192N10.2
0.000350392	0.332641	0.917	0.602	IPC-div1	MAGED1
0.000120541	0.332756	0.361	0.23	IPC-div1	CRNKL1
0.00578959	0.333994	0.417	0.174	IPC-div1	OTUD6B
0.00486333	0.337133	0.639	0.378	IPC-div1	MIB1
0.00996464	0.33745	0.472	0.231	IPC-div1	EXOSC9
0.00211872	0.338676	0.889	0.649	IPC-div1	SERF2
0.0099719	0.340449	0.5	0.266	IPC-div1	STARD3NL
0.00822102	0.342919	0.667	0.42	IPC-div1	TFDP2
0.000122338	0.345469	0.833	0.47	IPC-div1	DCAF16
0.00365952	0.345559	0.472	0.2	IPC-div1	FBLN1
0.00300355	0.347895	0.722	0.49	IPC-div1	PER2
5.94e-05	0.348279	0.667	0.384	IPC-div1	CD63
0.00124153	0.348816	0.778	0.469	IPC-div1	DHX15
0.00831766	0.349287	0.444	0.241	IPC-div1	POLDIP3
1.59e-06	0.349749	0.917	0.694	IPC-div1	SPAG9
0.00249117	0.355457	0.639	0.333	IPC-div1	COA1
5.25e-07	0.356686	1	0.862	IPC-div1	SUMO2
0.00250589	0.357227	0.528	0.286	IPC-div1	NDUFB3
0.00864265	0.357444	0.417	0.441	IPC-div1	RP13.585F24.1
0.000336358	0.358754	0.833	0.53	IPC-div1	ARPP19
0.000709052	0.359146	0.806	0.579	IPC-div1	PUM1
0.00115728	0.361156	0.583	0.344	IPC-div1	VPS36
0.00499102	0.361614	0.389	0.159	IPC-div1	RP11.268I9.1
0.00247796	0.361649	0.694	0.43	IPC-div1	PFDN1
0.00177053	0.361774	0.722	0.417	IPC-div1	NOVA1
0.00113993	0.36215	0.667	0.353	IPC-div1	VBP1
1.18e-06	0.362589	0.972	0.742	IPC-div1	DAAM1
3.13e-08	0.368729	0.778	0.485	IPC-div1	RAB11A
1.96e-05	0.370694	0.722	0.35	IPC-div1	ELAVL2
0.000127686	0.371501	0.972	0.753	IPC-div1	PHIP
1.61e-06	0.373126	0.556	0.168	IPC-div1	CLVS2
0.00240184	0.373488	0.889	0.607	IPC-div1	LSM12
0.00830982	0.375418	0.75	0.515	IPC-div1	DENND5A
0.00131586	0.376211	0.333	0.103	IPC-div1	TSHZ1
5.05e-05	0.376677	1	0.942	IPC-div1	SRSF3
7.74e-06	0.376834	0.889	0.551	IPC-div1	HMGN3
1.15e-05	0.377988	0.861	0.579	IPC-div1	DHX9
0.00411597	0.378922	0.694	0.461	IPC-div1	SLC25A5
0.000400199	0.378928	0.944	0.722	IPC-div1	LINC01158
0.00225041	0.379979	0.583	0.32	IPC-div1	SUGP2
0.00249855	0.380157	0.694	0.438	IPC-div1	NARF
0.000325083	0.381424	0.5	0.278	IPC-div1	TIMM8B
0.00064392	0.38195	0.806	0.567	IPC-div1	ZMIZ1
5.14e-12	0.382183	0.389	0.029	IPC-div1	PTTG3P
4.44e-07	0.382838	0.944	0.592	IPC-div1	MDM2
0.00107434	0.383603	1	0.957	IPC-div1	HNRNPA1
0.00389975	0.384293	0.583	0.312	IPC-div1	STT3B
6.36e-07	0.385299	0.889	0.72	IPC-div1	CKB
0.000539395	0.390138	0.833	0.574	IPC-div1	USP47
0.00667107	0.390957	0.694	0.408	IPC-div1	COPS6
0.00533507	0.391072	0.361	0.131	IPC-div1	PEX19
8.4e-05	0.391093	0.556	0.212	IPC-div1	CEP57L1
0.0035332	0.391834	0.611	0.386	IPC-div1	KLHL9
0.00184656	0.392763	0.417	0.175	IPC-div1	CCDC152
4.79e-06	0.393026	0.944	0.815	IPC-div1	PSIP1
0.00385485	0.39306	0.389	0.149	IPC-div1	PIH1D1
2.16e-05	0.394185	0.833	0.481	IPC-div1	ERH
0.000405802	0.397037	0.694	0.348	IPC-div1	CNR1
4.29e-05	0.400411	0.833	0.663	IPC-div1	KHDRBS1
0.00194084	0.403735	0.306	0.084	IPC-div1	CENPQ
0.00246	0.405652	0.611	0.36	IPC-div1	SPCS2P4
0.00125291	0.407517	0.389	0.146	IPC-div1	H2AFZP3
0.000845329	0.4086	0.583	0.272	IPC-div1	CEP89
1.19e-05	0.411628	0.806	0.408	IPC-div1	DCLRE1C
0.00398803	0.411943	0.694	0.461	IPC-div1	PA2G4
3.33e-09	0.413523	1	0.896	IPC-div1	CCND2
0.00338595	0.41471	0.667	0.382	IPC-div1	TTLL5
0.000720025	0.414881	0.444	0.182	IPC-div1	RHNO1
2.04e-09	0.41493	0.944	0.644	IPC-div1	EZR
5.03e-05	0.415735	0.694	0.311	IPC-div1	HSPA13
0.00223359	0.416502	0.5	0.215	IPC-div1	PHLPP1
2.25e-05	0.42192	0.583	0.216	IPC-div1	ACTL6A
0.00646247	0.424439	0.528	0.256	IPC-div1	ANXA5
0.00432985	0.425031	0.333	0.113	IPC-div1	RP11.798M19.6
0.00261345	0.425414	0.583	0.287	IPC-div1	EBP
0.00755865	0.426567	0.778	0.574	IPC-div1	AKT3
0.00666772	0.427648	0.583	0.316	IPC-div1	FUT9
0.000273669	0.428046	0.861	0.546	IPC-div1	PARK7
0.000372147	0.42823	0.528	0.245	IPC-div1	ING1
7.38e-06	0.428359	0.833	0.491	IPC-div1	SGCB
5.95e-07	0.429398	0.639	0.337	IPC-div1	PIP4K2A
0.000949491	0.433064	0.861	0.577	IPC-div1	TOP1
0.00896814	0.433365	0.833	0.66	IPC-div1	NPM1P27
0.00266661	0.434355	0.917	0.791	IPC-div1	HNRNPL
1.72e-09	0.434871	0.889	0.389	IPC-div1	FBXL5
0.00508204	0.435242	0.722	0.436	IPC-div1	PSMB3
0.000154565	0.438985	0.667	0.304	IPC-div1	MDK
0.00670328	0.440615	0.528	0.348	IPC-div1	ZNF518B
0.000582434	0.441126	0.806	0.611	IPC-div1	UBXN4
0.00201556	0.442677	0.333	0.133	IPC-div1	ANKRD10.IT1
7.56e-05	0.443482	0.861	0.52	IPC-div1	XRCC6
0.00121628	0.443548	0.556	0.251	IPC-div1	FSTL1
1.01e-07	0.445445	0.611	0.189	IPC-div1	TFAP2C
0.00118477	0.446156	0.694	0.41	IPC-div1	SYF2
0.0017983	0.446189	0.361	0.115	IPC-div1	TMEM19
0.000315971	0.452499	0.917	0.748	IPC-div1	NONO
0.00132605	0.452833	0.472	0.187	IPC-div1	SLCO5A1
0.00250087	0.452881	0.333	0.108	IPC-div1	SGTB
0.00266668	0.453722	0.278	0.151	IPC-div1	MIR133A1HG
0.00198045	0.453753	0.556	0.383	IPC-div1	ZNF714
0.000561153	0.454326	0.667	0.328	IPC-div1	EIF4EP2
0.00241787	0.456737	0.556	0.338	IPC-div1	CALM2P3
1.31e-09	0.457815	0.972	0.789	IPC-div1	CBX5
0.000435383	0.458146	0.611	0.317	IPC-div1	CEP78
0.00546822	0.458271	0.528	0.281	IPC-div1	TRAPPC13
0.00111125	0.459444	0.556	0.311	IPC-div1	TMEM237
0.00741766	0.461459	0.306	0.102	IPC-div1	TMEM256
4.05e-06	0.461551	0.972	0.764	IPC-div1	FUBP1
2.43e-06	0.461889	0.778	0.347	IPC-div1	LARP7
5.3e-06	0.462266	1	0.994	IPC-div1	MARCKS
1.14e-05	0.462414	0.889	0.547	IPC-div1	ENC1
0.00130748	0.462854	0.694	0.385	IPC-div1	INIP
0.00680665	0.462873	0.833	0.682	IPC-div1	SLC38A2
6.7e-06	0.463176	0.417	0.107	IPC-div1	RP11.407N17.6
4.23e-06	0.463293	0.75	0.383	IPC-div1	DCP2
0.00224252	0.466753	0.639	0.369	IPC-div1	ELMO1
1.02e-09	0.468044	1	0.806	IPC-div1	USP22
0.000816652	0.468583	0.528	0.239	IPC-div1	C3orf58
0.00764159	0.468879	0.389	0.165	IPC-div1	AP000962.2
0.00475386	0.469805	0.5	0.263	IPC-div1	POLR2E
0.00576753	0.470292	0.278	0.152	IPC-div1	EXOG
3.87e-05	0.471175	0.833	0.566	IPC-div1	CCDC14
0.00595869	0.472119	0.444	0.197	IPC-div1	RCC2
0.00428365	0.473153	0.833	0.57	IPC-div1	SRGAP2C
1.51e-05	0.474448	0.972	0.745	IPC-div1	HNRNPK
1.16e-10	0.476277	0.778	0.279	IPC-div1	HMGN2P41
0.00127181	0.476326	0.472	0.256	IPC-div1	UBE2Q2P2
1.46e-06	0.477193	0.778	0.431	IPC-div1	ACLY
0.00313509	0.480845	0.778	0.474	IPC-div1	SPCS2
0.000431772	0.481001	0.778	0.437	IPC-div1	PSMD14
0.0089693	0.481981	0.583	0.313	IPC-div1	SEZ6L
0.000383602	0.482317	0.611	0.279	IPC-div1	RHEB
1.78e-05	0.482893	0.389	0.15	IPC-div1	RP11.138A9.2
5.65e-06	0.483275	0.917	0.599	IPC-div1	CBX1
0.00683696	0.485848	0.583	0.346	IPC-div1	UBAP2
0.00442922	0.488394	0.361	0.124	IPC-div1	KAT2B
0.00293753	0.48891	0.333	0.148	IPC-div1	TRIAP1
0.00419283	0.490238	0.583	0.343	IPC-div1	EHMT1
0.00266173	0.490749	0.472	0.237	IPC-div1	TACC1
0.00729987	0.494953	0.556	0.279	IPC-div1	ASNSD1
2.25e-07	0.495186	0.917	0.569	IPC-div1	CHD7
2.24e-05	0.496437	0.806	0.413	IPC-div1	EXOSC8
0.00153815	0.499647	0.306	0.104	IPC-div1	STK35
1.76e-05	0.499742	0.833	0.556	IPC-div1	CTNND1
0.000374112	0.500287	0.75	0.519	IPC-div1	PABPN1
0.00108152	0.502263	0.694	0.413	IPC-div1	HMGB1P1
9.89e-06	0.505054	0.917	0.745	IPC-div1	TUBBP1
0.00225158	0.507164	0.556	0.259	IPC-div1	LCLAT1
0.000218691	0.507261	0.694	0.34	IPC-div1	CCDC112
0.00845017	0.507844	0.778	0.555	IPC-div1	DNAJC8
1.7e-09	0.508139	0.944	0.613	IPC-div1	CORO1C
0.00414857	0.508945	0.556	0.275	IPC-div1	CDON
4.56e-06	0.509404	0.528	0.17	IPC-div1	DENND1B
2.42e-06	0.510488	0.833	0.491	IPC-div1	ZNF43
6.5e-07	0.513911	0.444	0.32	IPC-div1	UBE2G1
3.29e-05	0.518455	0.694	0.352	IPC-div1	LHX2
0.00168864	0.519991	0.472	0.201	IPC-div1	RNF114
0.000129791	0.520127	0.694	0.333	IPC-div1	TMX1
0.00088661	0.528222	0.556	0.25	IPC-div1	ANP32B
0.000217426	0.528268	0.639	0.283	IPC-div1	ATAD5
0.00013422	0.530312	0.722	0.465	IPC-div1	PTPLAD1
5.83e-09	0.531019	0.833	0.34	IPC-div1	NUP98
0.00550107	0.531469	0.694	0.422	IPC-div1	RSRC1
2.93e-06	0.532198	0.278	0.138	IPC-div1	LGALS1
2e-08	0.535955	0.417	0.059	IPC-div1	HIST1H3C
0.00608827	0.536395	0.583	0.319	IPC-div1	GJC1
0.00089719	0.536877	0.861	0.585	IPC-div1	MZT2B
0.0044227	0.53745	0.667	0.383	IPC-div1	CTCF
7.52e-07	0.538979	0.778	0.444	IPC-div1	SOGA1
0.00770181	0.540357	0.417	0.189	IPC-div1	TMTC4
0.00822832	0.542838	0.361	0.139	IPC-div1	CENPT
0.00334901	0.544365	0.694	0.468	IPC-div1	MDH2
2.74e-06	0.545788	0.639	0.249	IPC-div1	DKC1
0.00301426	0.547358	0.417	0.2	IPC-div1	LPPR4
8.66e-06	0.54792	0.556	0.182	IPC-div1	FANCI
0.00105272	0.548017	0.417	0.146	IPC-div1	GPC6
9.42e-05	0.549601	0.5	0.171	IPC-div1	PHF21B
0.000404694	0.550056	0.611	0.28	IPC-div1	ANKRD32
0.00508901	0.550385	0.667	0.376	IPC-div1	FOXN2
0.00413046	0.55144	0.417	0.173	IPC-div1	C1D
1.73e-07	0.552215	1	0.83	IPC-div1	SYNE2
0.00638341	0.553187	0.444	0.192	IPC-div1	CISD2
0.0049224	0.553192	0.556	0.359	IPC-div1	SSH2
2.98e-08	0.553526	0.972	0.742	IPC-div1	CBX3
0.000370638	0.553631	0.611	0.422	IPC-div1	TUBAP2
0.00259576	0.554416	0.528	0.238	IPC-div1	TMEM183A
8.77e-07	0.554743	0.944	0.571	IPC-div1	GOLIM4
0.00302778	0.555781	0.75	0.456	IPC-div1	ANKRD40
0.00301493	0.558805	0.556	0.264	IPC-div1	CCDC167
7.39e-05	0.562124	0.361	0.154	IPC-div1	ALG8
3.81e-06	0.5625	0.944	0.753	IPC-div1	SRSF10
0.00943192	0.562936	0.5	0.305	IPC-div1	NF2
1.83e-12	0.563045	1	0.704	IPC-div1	SMC3
0.00269072	0.566705	0.444	0.182	IPC-div1	AACS
0.00833248	0.567577	0.444	0.192	IPC-div1	RBM41
8.79e-05	0.568404	0.556	0.216	IPC-div1	PTPRK
7.44e-06	0.569241	0.889	0.554	IPC-div1	MYEF2
0.00177468	0.570251	0.778	0.5	IPC-div1	G3BP1
3.06e-06	0.570629	0.75	0.329	IPC-div1	CDK19
0.00051038	0.572626	0.75	0.412	IPC-div1	SMS
0.00739748	0.573709	0.861	0.6	IPC-div1	GTF2I
7.19e-06	0.574038	0.583	0.265	IPC-div1	CNIH4
0.00120191	0.575198	0.361	0.113	IPC-div1	CHCHD7
0.000478572	0.576061	0.444	0.15	IPC-div1	STON2
0.00890694	0.577234	0.389	0.155	IPC-div1	POT1.AS1
0.00911582	0.577641	0.417	0.345	IPC-div1	NAA16
0.000598711	0.578082	0.861	0.548	IPC-div1	NDUFC2
0.00981033	0.581161	0.528	0.3	IPC-div1	PSMC2
0.00046513	0.585249	0.806	0.48	IPC-div1	VEZF1
0.00336104	0.586605	0.444	0.184	IPC-div1	KIAA1958
7.37e-06	0.587377	0.583	0.282	IPC-div1	SEC11A
0.000371634	0.591202	0.556	0.225	IPC-div1	CEP192
0.000128068	0.59281	0.694	0.368	IPC-div1	SMIM14
0.00610264	0.595337	0.278	0.082	IPC-div1	B4GALT4
8.08e-05	0.5956	0.5	0.168	IPC-div1	HMGN5
0.00314406	0.596744	0.75	0.463	IPC-div1	ATCAY
0.0051491	0.60098	0.361	0.164	IPC-div1	NSMCE1
0.00511426	0.606189	0.333	0.125	IPC-div1	SUV39H2
1.3e-05	0.607523	0.361	0.116	IPC-div1	CLSPN
0.000357735	0.608653	0.611	0.295	IPC-div1	JADE1
3.49e-08	0.612761	0.75	0.335	IPC-div1	RRM1
0.00241211	0.613693	0.611	0.365	IPC-div1	MPPED2
0.00592202	0.615255	0.389	0.166	IPC-div1	ZNF675
0.000189553	0.61603	0.778	0.436	IPC-div1	SNRPC
0.000126	0.617192	0.75	0.377	IPC-div1	CDKAL1
0.00864352	0.618158	0.417	0.195	IPC-div1	MSANTD3
4.2e-10	0.618408	1	0.68	IPC-div1	RAN
0.00417295	0.619626	0.583	0.297	IPC-div1	LCORL
7.72e-05	0.622453	0.639	0.277	IPC-div1	UXT
1.51e-09	0.622556	0.75	0.457	IPC-div1	ELAVL4
0.00123421	0.622814	0.5	0.267	IPC-div1	RAB8A
4.41e-11	0.623408	0.889	0.49	IPC-div1	NUP50
0.000828855	0.628322	0.694	0.421	IPC-div1	EFNB2
1.93e-10	0.63229	0.278	0.025	IPC-div1	RP11.336N8.4
0.00258919	0.63238	0.444	0.178	IPC-div1	LMO7
1.38e-10	0.632761	0.889	0.69	IPC-div1	ARID2
0.00722026	0.633601	0.528	0.264	IPC-div1	BARD1
0.00745138	0.635489	0.361	0.139	IPC-div1	CDK16
0.00178036	0.636487	0.944	0.792	IPC-div1	CFL1
0.000505549	0.640803	0.556	0.255	IPC-div1	DCTN3
0.000125768	0.642281	0.861	0.509	IPC-div1	NUPL1
0.00743111	0.642357	0.361	0.16	IPC-div1	TGIF2
0.0045908	0.645812	0.611	0.431	IPC-div1	NUP93
2.48e-08	0.646491	1	0.776	IPC-div1	HNRNPR
3.76e-05	0.648842	0.639	0.439	IPC-div1	CBFA2T2
0.00796431	0.649062	0.528	0.301	IPC-div1	PGRMC2
2.78e-05	0.649725	0.5	0.158	IPC-div1	CENPK
1.03e-05	0.649776	0.556	0.281	IPC-div1	PLCB1
6.86e-06	0.650174	0.722	0.335	IPC-div1	PARP2
9.15e-05	0.651533	0.333	0.074	IPC-div1	RP11.386M24.4
6.2e-05	0.652259	0.472	0.146	IPC-div1	CMC1
0.00613751	0.654989	0.583	0.345	IPC-div1	MAGI1
1.28e-05	0.656689	0.444	0.131	IPC-div1	H2AFY2
2.04e-09	0.656993	0.75	0.304	IPC-div1	WEE1
0.00037058	0.657882	0.861	0.536	IPC-div1	DCAF7
1.14e-06	0.660812	1	0.939	IPC-div1	TUBB
0.00479725	0.660858	0.528	0.254	IPC-div1	BLOC1S1
0.000539932	0.663213	0.583	0.259	IPC-div1	MBNL1
4.13e-08	0.66513	0.972	0.554	IPC-div1	HSP90B1
1.38e-08	0.665311	0.889	0.528	IPC-div1	CUX1
0.00596345	0.666835	0.944	0.76	IPC-div1	RP11.543P15.1
0.00307225	0.66785	0.556	0.262	IPC-div1	MRPL47
0.00426834	0.66801	0.333	0.111	IPC-div1	POLH
0.000552604	0.66815	0.639	0.31	IPC-div1	CCP110
6.59e-07	0.669056	0.861	0.549	IPC-div1	KIF5B
1.53e-06	0.670094	0.639	0.235	IPC-div1	ADD3
0.000648286	0.670161	0.389	0.119	IPC-div1	LSM4
0.000365126	0.670582	0.528	0.207	IPC-div1	TMEM158
0.000136171	0.670881	0.556	0.267	IPC-div1	DBN1
4.39e-06	0.671103	0.944	0.62	IPC-div1	HNRNPH3
2.57e-07	0.675829	0.944	0.616	IPC-div1	PPP2R5C
5.24e-09	0.677619	0.944	0.453	IPC-div1	WIPF3
0.00667261	0.679014	0.417	0.188	IPC-div1	MPP5
0.000148349	0.680419	0.639	0.328	IPC-div1	SCARNA22
0.00314887	0.680466	0.611	0.309	IPC-div1	CLIC4
8.48e-06	0.682289	0.556	0.19	IPC-div1	ZGRF1
1.16e-10	0.684884	1	0.837	IPC-div1	HP1BP3
3.6e-06	0.686002	0.917	0.575	IPC-div1	CCAR1
0.00384427	0.686797	0.611	0.369	IPC-div1	CCNH
2.84e-05	0.686839	0.806	0.533	IPC-div1	PRDX1
8.13e-05	0.687701	0.667	0.297	IPC-div1	PNRC2
0.00144612	0.688165	0.389	0.242	IPC-div1	NFYA
6.8e-08	0.688404	0.667	0.205	IPC-div1	KNTC1
0.00810068	0.689805	0.333	0.116	IPC-div1	TMEM194A
0.000504105	0.692654	0.556	0.229	IPC-div1	PSPC1
0.00395092	0.6963	0.667	0.377	IPC-div1	TRO
0.00555425	0.696936	0.361	0.137	IPC-div1	ZNF273
0.00465818	0.697062	0.278	0.078	IPC-div1	RP11.85O21.5
5.6e-08	0.700556	0.806	0.352	IPC-div1	SNCAIP
0.000418329	0.700632	0.778	0.471	IPC-div1	HNRNPUL1
0.00235296	0.700734	0.333	0.102	IPC-div1	CEP128
1.62e-06	0.702022	0.917	0.528	IPC-div1	MSI1
0.00865595	0.702204	0.5	0.24	IPC-div1	NUDC
4.23e-06	0.703113	0.5	0.138	IPC-div1	SAP30
1.24e-07	0.703311	0.917	0.709	IPC-div1	HN1
0.00105274	0.704308	0.611	0.299	IPC-div1	GNG5
1.08e-05	0.710359	0.556	0.18	IPC-div1	C18orf54
0.00277861	0.714571	0.306	0.089	IPC-div1	SSNA1
0.00993385	0.714995	0.333	0.156	IPC-div1	CWF19L1
0.00135286	0.715559	0.417	0.146	IPC-div1	POLR2C
0.000281424	0.715596	0.639	0.287	IPC-div1	TPRKB
0.00388755	0.7159	0.611	0.344	IPC-div1	CWF19L2
4.38e-11	0.716907	1	0.7	IPC-div1	TULP4
9.35e-05	0.717987	0.667	0.302	IPC-div1	SORT1
9.57e-06	0.718226	0.667	0.268	IPC-div1	LDLR
5.59e-05	0.720736	0.722	0.37	IPC-div1	FRMD4B
3.75e-08	0.72206	1	0.859	IPC-div1	RBMX
0.000973074	0.722464	0.444	0.159	IPC-div1	SPATA5
2.08e-06	0.723511	1	0.955	IPC-div1	CALM2
2.22e-16	0.724343	1	0.745	IPC-div1	NFIA
0.000247789	0.7249	0.5	0.184	IPC-div1	MAGOHB
5.28e-05	0.727131	0.806	0.47	IPC-div1	YTHDF2
0.000112696	0.72734	0.5	0.187	IPC-div1	RFC4
4.68e-05	0.730448	0.778	0.416	IPC-div1	ING3
0.00398149	0.730806	0.278	0.075	IPC-div1	ZNF726
0.000966574	0.732687	0.583	0.265	IPC-div1	C19orf53
0.00093702	0.732862	0.5	0.239	IPC-div1	HPS4
0.00271761	0.733118	0.528	0.236	IPC-div1	NFIC
2.27e-10	0.734496	0.528	0.083	IPC-div1	HIST1H3B
1.21e-06	0.736216	0.556	0.157	IPC-div1	ZNF93
0.00325121	0.73782	0.722	0.508	IPC-div1	HMGCR
0.000120269	0.738917	0.694	0.322	IPC-div1	SESN3
6.45e-05	0.740579	0.444	0.179	IPC-div1	EDRF1
0.000273319	0.741252	0.667	0.459	IPC-div1	ZNF608
0.00430517	0.742155	0.639	0.369	IPC-div1	KARS
0.00107974	0.742482	0.333	0.096	IPC-div1	ZNF85
4.98e-05	0.743633	0.694	0.316	IPC-div1	AGO1
0.0029305	0.745273	0.806	0.578	IPC-div1	ELAVL3
0.00367813	0.746747	0.444	0.239	IPC-div1	NAA38
2.33e-05	0.746829	0.667	0.33	IPC-div1	CBL
0.00194946	0.747038	0.528	0.235	IPC-div1	ID4
0.00101581	0.747151	0.611	0.309	IPC-div1	CCNG2
1.61e-14	0.748184	0.528	0.08	IPC-div1	HMGN2P6
0.000669744	0.748594	0.361	0.104	IPC-div1	MCM8
0.00517353	0.748919	0.361	0.132	IPC-div1	DACH1
0.00025681	0.749241	0.472	0.167	IPC-div1	ITGB3BP
5.85e-05	0.750354	0.611	0.255	IPC-div1	DZIP3
1.31e-05	0.753028	0.639	0.378	IPC-div1	MYO10
0.00963142	0.755109	0.306	0.132	IPC-div1	DHX38
1.47e-05	0.755146	0.75	0.361	IPC-div1	DR1
0.000214161	0.758454	0.667	0.395	IPC-div1	HNRNPLL
0.00972008	0.759399	0.556	0.333	IPC-div1	RNF5
0.0057232	0.761599	0.306	0.094	IPC-div1	LINC01224
4.02e-12	0.763522	0.972	0.651	IPC-div1	ILF2
0.00574496	0.764925	0.389	0.156	IPC-div1	SH3PXD2A
0.00146532	0.766415	0.361	0.17	IPC-div1	NDUFAF3
0.009623	0.768572	0.361	0.136	IPC-div1	RABL3
0.000192452	0.769977	0.667	0.317	IPC-div1	GABPB1
0.000654337	0.770305	0.472	0.188	IPC-div1	RNU6.957P
6.52e-05	0.770612	0.583	0.36	IPC-div1	CTDSPL2
0.00189701	0.772543	0.472	0.19	IPC-div1	EIF3G
0.00359041	0.772971	0.333	0.131	IPC-div1	BEND3
8.42e-07	0.7796	0.639	0.21	IPC-div1	CDKN1B
0.000315238	0.779678	0.389	0.112	IPC-div1	FJX1
3.58e-06	0.780313	0.694	0.299	IPC-div1	CENPJ
7.69e-07	0.780376	0.556	0.151	IPC-div1	INSM1
0.000398639	0.780498	0.5	0.241	IPC-div1	ZAK
2.49e-06	0.780579	0.75	0.329	IPC-div1	MRPL51
0.00182561	0.780785	0.528	0.24	IPC-div1	KCTD3
3.14e-10	0.782771	0.556	0.249	IPC-div1	RP5.821D11.7
4.25e-06	0.787574	0.694	0.365	IPC-div1	DLEU2
1.34e-07	0.787654	0.889	0.529	IPC-div1	HMGB1P10
7.07e-06	0.788181	0.583	0.204	IPC-div1	PCNA
1.47e-06	0.788677	0.639	0.224	IPC-div1	COX17
1.28e-07	0.789997	0.917	0.497	IPC-div1	CSRP2
0.00733584	0.789997	0.333	0.118	IPC-div1	BUD13
1.19e-06	0.790197	0.5	0.29	IPC-div1	TRIM26
2.28e-05	0.790447	0.444	0.149	IPC-div1	CHEK1
6e-05	0.793853	0.833	0.5	IPC-div1	PSMA4
7.85e-05	0.795571	0.444	0.128	IPC-div1	PCBD2
0.000787612	0.796319	0.5	0.238	IPC-div1	TRIM28
0.00607639	0.797026	0.278	0.106	IPC-div1	GKAP1
0.000342475	0.797439	0.528	0.242	IPC-div1	PHC2
0.00390968	0.798339	0.417	0.175	IPC-div1	METTL10
0.00220598	0.800429	0.278	0.153	IPC-div1	ADRM1
0.000143545	0.811046	0.722	0.62	IPC-div1	RPL21P28
4.38e-05	0.812541	0.806	0.429	IPC-div1	H2AFY
0.000724908	0.812837	0.5	0.193	IPC-div1	IDH3G
0.000364187	0.814559	0.472	0.233	IPC-div1	PTMS
1.23e-07	0.815361	0.944	0.548	IPC-div1	DEK
0.000405756	0.817202	0.333	0.085	IPC-div1	TUBB6
1.64e-13	0.818338	1	0.928	IPC-div1	HNRNPA2B1
0.000166122	0.821899	0.556	0.239	IPC-div1	SAE1
0.00214569	0.823702	0.417	0.158	IPC-div1	HN1L
0.000118574	0.824047	0.639	0.282	IPC-div1	BTG3
0.000355494	0.828256	0.75	0.415	IPC-div1	LAPTM4A
0.000220277	0.829119	0.444	0.139	IPC-div1	MDC1
5.88e-06	0.830741	0.472	0.142	IPC-div1	RFC5
1.11e-16	0.831442	0.444	0.021	IPC-div1	CDC20P1
0.00471786	0.832217	0.306	0.093	IPC-div1	SPRTN
1.07e-06	0.834641	0.694	0.275	IPC-div1	CUL1
0.000988329	0.834902	0.389	0.125	IPC-div1	C12orf73
3.61e-05	0.835768	0.417	0.231	IPC-div1	CSTF1
0.00511862	0.835797	0.306	0.096	IPC-div1	AC004381.6
0.00380168	0.837338	0.528	0.246	IPC-div1	AMOTL2
3.8e-05	0.84279	0.472	0.138	IPC-div1	TRIM45
1.13e-07	0.847008	0.917	0.503	IPC-div1	MARCH7
1.72e-07	0.851717	0.889	0.539	IPC-div1	POU3F2
0.00527122	0.852914	0.361	0.203	IPC-div1	ZNF362
0.00165516	0.854656	0.583	0.273	IPC-div1	RNF4
6.2e-05	0.855633	0.278	0.046	IPC-div1	XRCC6P4
0.00225361	0.858053	0.472	0.191	IPC-div1	SPATA13
0.00132442	0.860321	0.389	0.132	IPC-div1	RNASEH2A
1.89e-07	0.860979	0.306	0.033	IPC-div1	DBF4P1
0.00046529	0.861644	0.556	0.254	IPC-div1	RBMXP2
1.49e-06	0.861717	0.667	0.302	IPC-div1	SKIDA1
1.85e-05	0.862046	0.472	0.133	IPC-div1	RP11.168J18.6
2.22e-16	0.862047	1	0.957	IPC-div1	HMGB1
2.02e-06	0.862146	0.806	0.419	IPC-div1	DDAH2
7.79e-05	0.862572	0.556	0.297	IPC-div1	KBTBD2
0.000105414	0.863809	0.778	0.431	IPC-div1	NFIX
2.42e-08	0.867775	0.556	0.138	IPC-div1	KIAA0101
0.000297534	0.870632	0.528	0.213	IPC-div1	RP11.663P9.2
0.00017823	0.871369	0.472	0.155	IPC-div1	ZC3H12C
0.00221179	0.875785	0.694	0.381	IPC-div1	ZNF24
0.00041093	0.878635	0.333	0.082	IPC-div1	MASTL
2.72e-11	0.880271	0.889	0.395	IPC-div1	LDHA
3.49e-05	0.880314	0.444	0.124	IPC-div1	MIS18A
2.38e-06	0.884087	0.75	0.359	IPC-div1	MMS22L
0.00901095	0.884312	0.361	0.135	IPC-div1	TDP1
6.44e-14	0.88599	1	0.803	IPC-div1	RP11.673C5.1
0.00493386	0.888204	0.306	0.104	IPC-div1	ZNF217
0.00515924	0.889662	0.611	0.347	IPC-div1	TEAD1
1.67e-06	0.890276	0.472	0.119	IPC-div1	LDLRAD3
0.000792351	0.893207	0.556	0.258	IPC-div1	CRB1
0.00304229	0.901927	0.278	0.08	IPC-div1	HIST1H1D
0.00208238	0.906613	0.361	0.117	IPC-div1	HIRIP3
0.000148122	0.90996	0.361	0.102	IPC-div1	DTL
1.1e-12	0.910017	0.972	0.746	IPC-div1	NUCKS1
0.00295988	0.913652	0.417	0.155	IPC-div1	ZNF682
0.00532143	0.913673	0.417	0.227	IPC-div1	CIAPIN1
5.93e-06	0.919141	0.472	0.181	IPC-div1	USP13
3.27e-05	0.920353	0.694	0.401	IPC-div1	HNRNPM
5.65e-07	0.921634	0.944	0.667	IPC-div1	BRD8
0.00266599	0.923025	0.333	0.103	IPC-div1	CHAF1A
0.00958533	0.923379	0.333	0.121	IPC-div1	PPP2R5D
3.21e-06	0.924152	0.5	0.137	IPC-div1	ORC6
4.8e-10	0.924429	0.917	0.433	IPC-div1	H2AFV
0.00693005	0.924571	0.528	0.258	IPC-div1	HAUS6
0.00845749	0.925466	0.333	0.116	IPC-div1	TMEM60
0.000219062	0.92561	0.278	0.069	IPC-div1	RP11.366L20.2
0.0047835	0.932367	0.583	0.33	IPC-div1	ZNF300
0.00376182	0.932601	0.333	0.111	IPC-div1	ELP4
0.00378713	0.933623	0.556	0.276	IPC-div1	EML1
0.000571084	0.934442	0.361	0.101	IPC-div1	DESI2
1.48e-07	0.937451	0.778	0.314	IPC-div1	USP1
0.00330557	0.939237	0.417	0.173	IPC-div1	MCRS1
0.00883863	0.93924	0.389	0.193	IPC-div1	CSRNP2
0.000386449	0.94131	0.583	0.288	IPC-div1	LRRC8A
2.36e-09	0.941574	0.472	0.077	IPC-div1	RP11.95I19.3
0.00172266	0.944891	0.528	0.244	IPC-div1	SRRT
0.00185603	0.952027	0.417	0.159	IPC-div1	ANAPC15
0.000153057	0.95304	0.444	0.147	IPC-div1	RCOR1
0.00132426	0.955656	0.389	0.133	IPC-div1	TAGLN2
0.00336566	0.959464	0.389	0.146	IPC-div1	CHRDL1
0.0066485	0.960997	0.556	0.307	IPC-div1	SCLT1
9.42e-05	0.961641	0.5	0.222	IPC-div1	ZNF92
0.00286829	0.965916	0.278	0.093	IPC-div1	ZC3H7B
0.00823625	0.967151	0.278	0.121	IPC-div1	RNF169
6.86e-05	0.96763	0.806	0.444	IPC-div1	UBE2L3
0.00781979	0.967657	0.361	0.133	IPC-div1	PLGRKT
0.00193084	0.967915	0.861	0.76	IPC-div1	MIR6723
0.000938824	0.968611	0.528	0.231	IPC-div1	PPM1B
6.78e-05	0.971194	0.694	0.32	IPC-div1	CMC2
2.46e-09	0.976346	0.861	0.477	IPC-div1	EZH2
0.0021958	0.976602	0.528	0.245	IPC-div1	CLMP
0.00535756	0.976908	0.361	0.202	IPC-div1	IKZF5
0.000787509	0.976999	0.5	0.207	IPC-div1	NUDT1
2.14e-07	0.977629	0.306	0.047	IPC-div1	DBF4B
0.00607594	0.979749	0.389	0.155	IPC-div1	RBM15
0.00317578	0.985702	0.361	0.133	IPC-div1	MYC
2.68e-07	0.987535	0.722	0.309	IPC-div1	CDC27
0.00217495	0.988155	0.5	0.257	IPC-div1	SNRPB
1.23e-05	0.98981	0.361	0.071	IPC-div1	MIR16.2
0.00189907	0.990111	0.389	0.161	IPC-div1	RP11.436K8.1
7.72e-08	0.990164	0.778	0.393	IPC-div1	CCT5
3e-13	0.991739	0.917	0.438	IPC-div1	QSER1
4.58e-06	0.99259	0.611	0.247	IPC-div1	KIAA1731
2.56e-05	0.994399	0.667	0.322	IPC-div1	NUP107
2.13e-05	0.998769	0.333	0.062	IPC-div1	HP08942
0.0020814	1.00498	0.389	0.137	IPC-div1	EMX2
2.63e-06	1.00669	0.694	0.283	IPC-div1	MID1
0.00253866	1.00788	0.333	0.102	IPC-div1	KCTD9
0.00968078	1.01031	0.333	0.135	IPC-div1	RASGRP1
0.0051154	1.01138	0.306	0.105	IPC-div1	AC004158.2
1.09e-14	1.01252	1	0.913	IPC-div1	HMGB1P5
0.00450966	1.01315	0.278	0.292	IPC-div1	RP5.857K21.7
2.05e-06	1.01897	0.75	0.338	IPC-div1	PSMC3
1.17e-05	1.02284	0.611	0.229	IPC-div1	HIST1H1C
3.41e-05	1.02416	0.583	0.231	IPC-div1	CARD8
0.00617131	1.02813	0.278	0.123	IPC-div1	CLGN
5.25e-06	1.03	0.778	0.388	IPC-div1	WHSC1
2.68e-05	1.03651	0.333	0.066	IPC-div1	NEUROG2
4.7e-06	1.04618	0.528	0.175	IPC-div1	RUVBL2
4.58e-05	1.05111	0.306	0.059	IPC-div1	ZNF492
0.000882009	1.05204	0.444	0.193	IPC-div1	ZNF100
3.67e-06	1.05251	0.5	0.162	IPC-div1	ATL2
2.62e-05	1.0575	0.5	0.173	IPC-div1	CLIC1
0.000523582	1.05791	0.694	0.519	IPC-div1	RPL7AP6
2.21e-08	1.05894	0.833	0.419	IPC-div1	CEP97
0.00018326	1.05931	0.417	0.122	IPC-div1	TIMELESS
0.00408472	1.06048	0.333	0.109	IPC-div1	PAPD7
3.61e-11	1.06122	0.75	0.254	IPC-div1	SLC4A8
1.98e-09	1.06427	0.75	0.249	IPC-div1	CEP70
9.65e-05	1.06547	0.417	0.123	IPC-div1	DAP
5.72e-09	1.06662	0.806	0.324	IPC-div1	ZEB1
0.00217531	1.06718	0.306	0.114	IPC-div1	OSER1.AS1
9.75e-06	1.07618	0.694	0.326	IPC-div1	SUZ12
6.31e-06	1.0776	0.972	0.91	IPC-div1	TUBA1C
7.43e-06	1.07956	0.833	0.435	IPC-div1	CNTRL
2.91e-11	1.08017	0.75	0.286	IPC-div1	HES6
0.000541388	1.08083	0.583	0.296	IPC-div1	ASXL1
0.00155846	1.08288	0.333	0.099	IPC-div1	BLM
0.000174749	1.0856	0.306	0.094	IPC-div1	ALDH16A1
0.00224844	1.08738	0.528	0.252	IPC-div1	GNG4
0.00051672	1.08934	0.389	0.149	IPC-div1	PTPRE
1.42e-05	1.09008	0.361	0.073	IPC-div1	E2F7
1.29e-06	1.09181	0.861	0.586	IPC-div1	TNPO2
2.79e-06	1.09276	0.583	0.268	IPC-div1	TANK
6.81e-08	1.10302	0.556	0.14	IPC-div1	NKAIN3
4.57e-08	1.10312	0.639	0.187	IPC-div1	STK17B
0.00661774	1.10438	0.389	0.18	IPC-div1	OS9
3.39e-05	1.1081	0.444	0.125	IPC-div1	CCDC34
9.4e-13	1.1121	0.917	0.522	IPC-div1	LBR
6.09e-07	1.12154	0.417	0.101	IPC-div1	TRMU
0.000110321	1.12742	0.361	0.085	IPC-div1	POC5
2.38e-08	1.13203	0.639	0.219	IPC-div1	CEP135
1.6e-05	1.13359	0.639	0.276	IPC-div1	KIAA0586
9.23e-05	1.13646	0.333	0.076	IPC-div1	IGSF9
1.37e-08	1.13756	0.778	0.284	IPC-div1	NUDCD2
0.00119928	1.15032	0.5	0.204	IPC-div1	DHTKD1
5.48e-08	1.15493	0.722	0.311	IPC-div1	PIK3R3
0.000140856	1.15663	0.556	0.278	IPC-div1	YAF2
0.000133986	1.15762	0.444	0.143	IPC-div1	UCP2
0.00167283	1.15811	0.472	0.202	IPC-div1	HDAC6
1.39e-07	1.16446	0.889	0.499	IPC-div1	IVNS1ABP
0.00390261	1.16678	0.556	0.296	IPC-div1	STAM
0.00998339	1.16873	0.278	0.091	IPC-div1	SFR1
4.7e-08	1.17272	0.75	0.282	IPC-div1	CDK5RAP2
2.9e-06	1.17659	0.528	0.153	IPC-div1	DNAJC9
0.000119456	1.17759	0.472	0.151	IPC-div1	FAM111A
3.09e-11	1.17787	0.667	0.161	IPC-div1	ASCL1
0.00406352	1.17918	0.444	0.267	IPC-div1	ABHD2
5.01e-05	1.1852	0.361	0.096	IPC-div1	MND1
1.5e-05	1.19067	0.333	0.079	IPC-div1	E2F2
0.0010024	1.19123	0.333	0.093	IPC-div1	TEX9
1.2e-08	1.1916	0.639	0.182	IPC-div1	SPDL1
0.00034927	1.19438	0.361	0.097	IPC-div1	PIM1
3.99e-11	1.19736	0.833	0.369	IPC-div1	LSM5
4.35e-05	1.19826	0.306	0.053	IPC-div1	ZNF724P
0.000251433	1.2014	0.417	0.133	IPC-div1	RAD18
0.000355703	1.20403	0.306	0.069	IPC-div1	JADE3
4.02e-10	1.20558	0.972	0.721	IPC-div1	SKA2
1.4e-07	1.21094	0.472	0.159	IPC-div1	SETD7
7.83e-06	1.21684	0.444	0.106	IPC-div1	TYMS
0.00410112	1.2206	0.306	0.15	IPC-div1	DCTPP1
2.62e-10	1.22334	0.778	0.328	IPC-div1	CENPC
0.000406873	1.22652	0.472	0.178	IPC-div1	PHGDH
1.56e-08	1.22958	0.611	0.171	IPC-div1	SSTR2
0.001	1.23541	0.972	0.693	IPC-div1	H2AFZ
1.19e-09	1.23662	0.611	0.157	IPC-div1	GMNN
1.95e-07	1.23694	0.5	0.111	IPC-div1	GEN1
0.00259202	1.23964	0.389	0.135	IPC-div1	TAF8
5.04e-05	1.24106	0.5	0.208	IPC-div1	NAB1
0.00590818	1.24108	0.333	0.116	IPC-div1	RP11.706O15.3
0.000312965	1.24857	0.444	0.144	IPC-div1	RFC3
2.09e-05	1.25052	0.583	0.223	IPC-div1	MAT2B
1.11e-15	1.2532	0.972	0.542	IPC-div1	CKAP5
0.0022187	1.25425	0.444	0.189	IPC-div1	TBC1D1
0.00210699	1.25494	0.306	0.109	IPC-div1	CPEB2
0.000584669	1.25618	0.278	0.066	IPC-div1	CENPM
1.84e-14	1.26393	0.833	0.4	IPC-div1	HMGN2P3
8.57e-07	1.26477	0.472	0.108	IPC-div1	LIN9
0.00372107	1.27208	0.389	0.173	IPC-div1	TUBG1
3.41e-09	1.28262	0.694	0.198	IPC-div1	UHRF1
0.00311366	1.28426	0.333	0.123	IPC-div1	ARL16
1.43e-07	1.28519	0.667	0.22	IPC-div1	RNFT2
0.00120983	1.28551	0.306	0.078	IPC-div1	BRIP1
2.55e-15	1.29068	0.667	0.093	IPC-div1	CENPN
3.88e-05	1.2957	0.472	0.153	IPC-div1	CCDC77
0.000493946	1.29725	0.278	0.089	IPC-div1	ENOSF1
0.00075775	1.30515	0.361	0.113	IPC-div1	MRPS18A
0.000511532	1.31228	0.444	0.167	IPC-div1	ODF2
0.000110508	1.31301	0.472	0.158	IPC-div1	NDC1
7.73e-06	1.31552	0.417	0.1	IPC-div1	NIF3L1
0.000114404	1.32268	0.417	0.129	IPC-div1	CEP152
9.16e-07	1.32355	0.222	0.267	IPC-div1	TMSB4XP4
0.00838272	1.32754	0.361	0.146	IPC-div1	PRIM2
0.000199671	1.32831	0.417	0.124	IPC-div1	MDM1
2.22e-16	1.33295	0.917	0.31	IPC-div1	PAX6
1.07e-05	1.33642	0.333	0.084	IPC-div1	NUP37
6.66e-16	1.33885	1	0.772	IPC-div1	TUBA1B
8.94e-05	1.34012	0.444	0.129	IPC-div1	LMNB1
1.58e-08	1.34066	0.556	0.123	IPC-div1	BRCA2
9.79e-07	1.34727	0.472	0.105	IPC-div1	RAD51AP1
0.00191553	1.34856	0.389	0.134	IPC-div1	STK17A
1.78e-07	1.35377	0.333	0.047	IPC-div1	CRNDE
0.000207305	1.35535	0.361	0.09	IPC-div1	POLQ
2.26e-06	1.35835	0.444	0.098	IPC-div1	HIST1H1B
4.4e-05	1.36603	0.5	0.164	IPC-div1	NCAPD3
1.64e-09	1.36813	0.5	0.081	IPC-div1	C21orf58
0.000314149	1.37105	0.389	0.196	IPC-div1	LRRN1
6.73e-05	1.39327	0.389	0.151	IPC-div1	ZIC2
4.41e-12	1.39368	0.806	0.232	IPC-div1	ATAD2
3.73e-07	1.39562	0.528	0.139	IPC-div1	DNA2
1.28e-12	1.39589	0.611	0.114	IPC-div1	FBXO5
3.91e-05	1.39836	0.361	0.077	IPC-div1	XRCC2
2.1e-14	1.39931	0.5	0.154	IPC-div1	ADCY3
0.00068941	1.40176	0.278	0.06	IPC-div1	MIIP
1.13e-11	1.4037	0.833	0.292	IPC-div1	SETD8
2.47e-08	1.4046	0.75	0.309	IPC-div1	POLR2A
1.52e-08	1.40468	0.417	0.065	IPC-div1	ZNF850
6.89e-11	1.41904	0.528	0.08	IPC-div1	H2AFX
2.44e-15	1.41938	0.944	0.617	IPC-div1	RAD21
3.48e-07	1.42057	0.667	0.231	IPC-div1	HDGF
0.0015169	1.42379	0.389	0.165	IPC-div1	GPD2
1.34e-07	1.42645	0.472	0.149	IPC-div1	C4orf46
4.64e-14	1.42727	0.944	0.445	IPC-div1	BUB3
1.84e-06	1.43437	0.417	0.097	IPC-div1	HSD17B11
2.69e-06	1.44393	0.556	0.211	IPC-div1	MPHOSPH9
1.11e-16	1.44541	0.556	0.04	IPC-div1	KIF4B
3.55e-06	1.45291	0.444	0.113	IPC-div1	TBC1D31
2.32e-05	1.45794	0.472	0.148	IPC-div1	KCTD15
0.001	1.4602	0.833	0.264	IPC-div1	SMC2
6.66e-16	1.46205	0.667	0.085	IPC-div1	SKA3
0.000171407	1.4633	0.361	0.111	IPC-div1	GTF3C5
2.54e-12	1.46983	0.806	0.263	IPC-div1	TUBB4B
0.001	1.47461	1	0.735	IPC-div1	HMGN2
2.22e-16	1.48733	0.806	0.192	IPC-div1	GAS2L3
1.11e-16	1.49275	0.972	0.457	IPC-div1	HMGB3
3.33e-15	1.49429	0.917	0.269	IPC-div1	VRK1
6.4e-06	1.49496	0.444	0.144	IPC-div1	FIGN
7.12e-05	1.4951	0.417	0.15	IPC-div1	GOT1
3.28e-11	1.50117	0.667	0.152	IPC-div1	CCDC18
1.35e-05	1.50467	0.417	0.104	IPC-div1	EFS
7.05e-11	1.50644	0.611	0.12	IPC-div1	DIAPH3
6.25e-05	1.51213	0.389	0.102	IPC-div1	HAUS8
7.13e-14	1.51693	0.556	0.063	IPC-div1	TACC3
9.44e-07	1.51958	0.472	0.11	IPC-div1	BRCA1
7.5e-05	1.529	0.306	0.056	IPC-div1	SMTN
0.000734249	1.52916	0.306	0.074	IPC-div1	CCDC150
2.39e-13	1.53009	0.611	0.1	IPC-div1	RRM2
5.89e-12	1.54052	0.194	0.27	IPC-div1	EEF1A1P19
8.63e-08	1.54078	0.417	0.064	IPC-div1	EMC9
0.000157311	1.56202	0.333	0.084	IPC-div1	MCM10
1.4e-09	1.56457	0.528	0.127	IPC-div1	TGIF1
9.88e-10	1.56748	0.5	0.078	IPC-div1	HYLS1
0.001	1.57798	1	0.491	IPC-div1	TMPO
5.29e-12	1.58137	0.528	0.066	IPC-div1	NCAPH
0.001	1.58225	0.972	0.505	IPC-div1	ANP32E
8.23e-07	1.58535	0.389	0.067	IPC-div1	SMOC1
5.13e-09	1.5915	0.556	0.149	IPC-div1	GPSM2
4.23e-08	1.59705	0.5	0.115	IPC-div1	CENPO
1.35e-11	1.6075	0.611	0.109	IPC-div1	ZWINT
4.2e-12	1.61095	0.472	0.058	IPC-div1	KIFC1
6.42e-05	1.61316	0.389	0.105	IPC-div1	RCC1
0.000354301	1.61887	0.278	0.065	IPC-div1	TK1
7.02e-07	1.61908	0.889	0.796	IPC-div1	HIST1H4C
1.06e-05	1.62135	0.444	0.115	IPC-div1	E2F3
2.76e-06	1.62136	0.306	0.04	IPC-div1	RP11.303E16.2
2.69e-09	1.63979	0.694	0.214	IPC-div1	DTYMK
0.000441228	1.65318	0.361	0.104	IPC-div1	HIST1H1A
4.02e-11	1.65388	0.639	0.15	IPC-div1	CENPU
0.001	1.67617	0.944	0.276	IPC-div1	KIF20B
2.29e-05	1.68172	0.417	0.137	IPC-div1	IFT122
6.84e-05	1.6865	0.444	0.16	IPC-div1	PSME2
0.001	1.70192	0.889	0.51	IPC-div1	HMGN2P5
3.97e-08	1.70465	0.5	0.115	IPC-div1	NEUROD1
1.22e-15	1.70944	0.861	0.219	IPC-div1	FANCD2
1.82e-14	1.71403	0.556	0.057	IPC-div1	KIF18B
0.001	1.73193	0.861	0.17	IPC-div1	KIAA1524
6.43e-07	1.73346	0.417	0.095	IPC-div1	FAM122B
1.2e-07	1.76516	0.5	0.138	IPC-div1	ZMYM1
1.31e-08	1.77057	0.444	0.073	IPC-div1	CTC.260E6.6
0.001	1.77178	0.972	0.648	IPC-div1	ARL6IP1
0.00316556	1.7807	0.278	0.087	IPC-div1	GADD45G
3.02e-05	1.79509	0.361	0.083	IPC-div1	CEP85
6.47e-11	1.79783	0.639	0.137	IPC-div1	DEPDC1B
2.33e-15	1.80031	0.806	0.194	IPC-div1	DDX39A
2.86e-10	1.81396	0.556	0.107	IPC-div1	ESCO2
1.11e-16	1.81398	0.75	0.144	IPC-div1	MZT1
1.51e-10	1.81702	0.361	0.026	IPC-div1	CENPA
5.71e-08	1.81979	0.444	0.092	IPC-div1	TTF2
6.83e-11	1.83402	0.5	0.092	IPC-div1	DMRTA2
7.77e-16	1.84539	0.861	0.27	IPC-div1	AC120042.1
1.33e-06	1.85791	0.528	0.166	IPC-div1	GTF3C4
0.001	1.86261	0.861	0.131	IPC-div1	ANLN
1.92e-08	1.86474	0.528	0.128	IPC-div1	LMNB2
0.001	1.87214	0.889	0.234	IPC-div1	DBF4
3.43e-14	1.88219	0.75	0.166	IPC-div1	NCAPG2
7.2e-08	1.88751	0.417	0.067	IPC-div1	FAM110A
6.99e-15	1.88789	0.722	0.143	IPC-div1	NCAPD2
1.02e-05	1.88964	0.333	0.07	IPC-div1	FANCB
2.11e-08	1.89176	0.556	0.146	IPC-div1	SEPHS1
7.53e-05	1.89958	0.333	0.07	IPC-div1	TICRR
1.57e-12	1.91046	0.667	0.122	IPC-div1	RANGAP1
2.28e-14	1.91212	0.5	0.045	IPC-div1	SAPCD2
4.6e-06	1.91283	0.278	0.033	IPC-div1	POC1A
1.47e-14	1.92577	0.778	0.172	IPC-div1	CKS1B
1.25e-14	1.92667	0.667	0.108	IPC-div1	SPC25
0.001	1.93066	0.917	0.14	IPC-div1	KIF15
0.001	1.93621	0.944	0.405	IPC-div1	G2E3
0.001	1.94091	0.944	0.311	IPC-div1	TRIM59
1.44e-09	1.943	0.583	0.128	IPC-div1	CENPW
0.00142062	1.95225	0.306	0.13	IPC-div1	SASS6
0.001	1.96654	0.861	0.274	IPC-div1	CKS2
2.07e-11	1.96898	0.556	0.102	IPC-div1	PLK4
2.84e-09	1.97503	0.528	0.107	IPC-div1	CDCA3
0.001	1.98665	0.861	0.164	IPC-div1	RACGAP1
0.001	2.00122	0.778	0.106	IPC-div1	PBK
1.4e-08	2.01465	0.444	0.073	IPC-div1	CDC25B
0.001	2.01843	0.861	0.176	IPC-div1	UBE2T
0.001	2.01989	0.861	0.168	IPC-div1	KIF22
7.63e-06	2.0427	0.361	0.067	IPC-div1	PHF19
0.001	2.04618	0.917	0.297	IPC-div1	SMC4
2.88e-11	2.05738	0.528	0.085	IPC-div1	CENPL
2.55e-15	2.06584	0.667	0.093	IPC-div1	MELK
0.001	2.06903	0.806	0.214	IPC-div1	MIS18BP1
3.33e-16	2.08147	0.694	0.112	IPC-div1	CIT
9.49e-11	2.08214	0.472	0.068	IPC-div1	APOLD1
0.001	2.11096	0.972	0.27	IPC-div1	CKAP2
0.001	2.11165	0.75	0.13	IPC-div1	MAD2L1
1.43e-08	2.12473	0.472	0.081	IPC-div1	STIL
1.46e-06	2.14043	0.278	0.059	IPC-div1	CENPI
0.001	2.14332	0.861	0.11	IPC-div1	NDC80
2.51e-07	2.14587	0.389	0.059	IPC-div1	MYBL1
0.001	2.16053	0.944	0.304	IPC-div1	HMGB2
0.001	2.16873	0.889	0.081	IPC-div1	DLGAP5
0.001	2.17657	0.861	0.124	IPC-div1	SPC24
1.31e-14	2.18543	0.639	0.101	IPC-div1	PSRC1
0.001	2.19881	0.833	0.102	IPC-div1	KIF18A
4.77e-13	2.20781	0.583	0.089	IPC-div1	CCNA2
0.001	2.20955	0.889	0.38	IPC-div1	KPNA2
0.001	2.21184	0.917	0.119	IPC-div1	IQGAP3
1.38e-08	2.21238	0.417	0.066	IPC-div1	CDCA5
2.11e-09	2.21492	0.417	0.049	IPC-div1	SHCBP1
4.48e-08	2.21709	0.389	0.054	IPC-div1	ESPL1
4.4e-07	2.23197	0.472	0.12	IPC-div1	RFWD3
3.89e-15	2.23696	0.667	0.115	IPC-div1	NDE1
2.76e-05	2.24098	0.278	0.041	IPC-div1	TMEM74
0.001	2.24528	0.917	0.159	IPC-div1	NCAPG
4.91e-07	2.25128	0.472	0.106	IPC-div1	ZNF826P
7.91e-08	2.26128	0.417	0.065	IPC-div1	SKA1
0.001	2.27159	0.833	0.137	IPC-div1	KNSTRN
3.33e-15	2.274	0.583	0.062	IPC-div1	DEPDC1
0.001	2.28067	0.833	0.087	IPC-div1	EOMES
0.001	2.2926	0.75	0.101	IPC-div1	PPP1R17
0.001	2.31497	0.806	0.106	IPC-div1	KIF14
0.001	2.35015	0.889	0.1	IPC-div1	KIF23
0.001	2.35086	0.861	0.139	IPC-div1	CASC5
0.001	2.35651	0.833	0.083	IPC-div1	AURKB
2.63e-13	2.35715	0.472	0.04	IPC-div1	FAM83D
0.001	2.36065	0.889	0.143	IPC-div1	CDK1
0.001	2.36303	0.917	0.195	IPC-div1	PRC1
5.05e-06	2.37844	0.306	0.044	IPC-div1	TRAIP
0.001	2.38161	0.889	0.129	IPC-div1	PRR11
0.001	2.39486	0.944	0.208	IPC-div1	NUSAP1
1.78e-10	2.40569	0.333	0.037	IPC-div1	ARHGEF39
0.001	2.43574	0.806	0.071	IPC-div1	CDC25C
3.77e-13	2.45778	0.556	0.076	IPC-div1	FOXM1
0.001	2.46568	0.944	0.159	IPC-div1	PTTG1
0.001	2.48292	0.722	0.094	IPC-div1	PENK
0.001	2.48468	0.722	0.112	IPC-div1	KIF11
0.001	2.48707	0.806	0.106	IPC-div1	ARHGAP11A
0.001	2.48846	0.806	0.085	IPC-div1	ARHGAP11B
0.001	2.50431	0.806	0.084	IPC-div1	SGOL1
0.001	2.51969	0.806	0.111	IPC-div1	RTKN2
0.001	2.53554	0.75	0.092	IPC-div1	CDKN3
0.001	2.53755	0.639	0.061	IPC-div1	CDCA2
1.77e-14	2.54064	0.639	0.1	IPC-div1	CCNF
1.06e-07	2.55162	0.333	0.057	IPC-div1	CHEK2
1.91e-09	2.55387	0.361	0.036	IPC-div1	FOXN4
0.001	2.56764	0.944	0.147	IPC-div1	CENPE
0.001	2.58338	0.944	0.142	IPC-div1	MKI67
0.001	2.59568	0.917	0.204	IPC-div1	TOP2A
4.77e-13	2.60301	0.556	0.082	IPC-div1	PARPBP
1.11e-15	2.60588	0.472	0.027	IPC-div1	NEUROD4
0.001	2.61324	0.889	0.095	IPC-div1	SPAG5
0.001	2.62742	0.722	0.089	IPC-div1	BUB1B
0.001	2.63409	0.833	0.115	IPC-div1	SGOL2
0.001	2.65174	0.778	0.085	IPC-div1	BUB1
0.001	2.65681	0.806	0.1	IPC-div1	CKAP2L
5.01e-09	2.67474	0.361	0.042	IPC-div1	ARHGAP19
0.001	2.70346	0.833	0.074	IPC-div1	HJURP
0.001	2.70557	0.944	0.133	IPC-div1	BIRC5
2.89e-08	2.71475	0.361	0.043	IPC-div1	HMMR
0.001	2.7168	0.861	0.101	IPC-div1	NUF2
0.001	2.72462	0.778	0.055	IPC-div1	TROAP
0.001	2.75538	0.833	0.094	IPC-div1	KIF2C
0.001	2.76105	0.556	0.031	IPC-div1	CEP55
0.001	2.7669	0.944	0.268	IPC-div1	CENPF
0.001	2.80053	0.944	0.141	IPC-div1	TPX2
0.001	2.81112	0.917	0.152	IPC-div1	ASPM
0.001	2.82338	0.806	0.078	IPC-div1	FAM64A
0.001	2.85747	0.694	0.06	IPC-div1	NEK2
0.001	2.85977	0.778	0.052	IPC-div1	CDC20
0.001	2.86443	0.917	0.086	IPC-div1	GTSE1
1.42e-14	2.86541	0.528	0.054	IPC-div1	INCENP
8.55e-15	2.881	0.444	0.029	IPC-div1	PIF1
5.59e-12	2.88279	0.444	0.04	IPC-div1	NEIL3
0.001	2.89143	0.806	0.064	IPC-div1	PLK1
0.001	2.89211	0.639	0.056	IPC-div1	AURKA
2.49e-08	2.90393	0.333	0.032	IPC-div1	RP11.480I12.5
0.001	2.91813	0.944	0.133	IPC-div1	ECT2
1.58e-10	2.92072	0.333	0.028	IPC-div1	FAM72D
0.001	2.93295	0.889	0.084	IPC-div1	KIF4A
0.001	2.93472	0.917	0.098	IPC-div1	UBE2C
0.001	2.95175	0.778	0.078	IPC-div1	TTK
0.001	3.00504	0.889	0.087	IPC-div1	CDCA8
0.001	3.0078	0.722	0.059	IPC-div1	KIF20A
0.001	3.01198	0.944	0.103	IPC-div1	CCNB2
0.001	3.03458	0.889	0.103	IPC-div1	CCNB1
0.000590528	0.250316	0.588	0.326	IPC-div2	API5
0.000180782	0.250593	0.588	0.294	IPC-div2	CASP8AP2
0.000186224	0.251054	0.471	0.216	IPC-div2	ACTL6A
0.00544629	0.253157	0.922	0.795	IPC-div2	YBX1
0.00988994	0.255032	0.529	0.315	IPC-div2	COMMD2
0.0027095	0.255627	0.804	0.555	IPC-div2	PSMD12
0.00193592	0.256327	0.294	0.216	IPC-div2	TRIP4
7.71e-06	0.256771	1	0.906	IPC-div2	RPS3
2.04e-05	0.256882	0.667	0.328	IPC-div2	CENPC
0.000598272	0.25768	0.412	0.172	IPC-div2	RP11.490K7.4
6.26e-09	0.259183	1	0.942	IPC-div2	SRSF3
0.000623485	0.260194	0.549	0.341	IPC-div2	TXLNA
0.00019176	0.26054	0.824	0.576	IPC-div2	CNBP
8.29e-05	0.261437	0.804	0.528	IPC-div2	CUX1
9.36e-06	0.264359	0.431	0.149	IPC-div2	ASAP2
0.000174583	0.266078	0.882	0.699	IPC-div2	RP11.69L16.5
0.00132212	0.26642	0.451	0.227	IPC-div2	NLGN1
0.00198504	0.270645	0.333	0.129	IPC-div2	LMNB1
0.000249635	0.270778	0.569	0.28	IPC-div2	PLCB1
0.000325945	0.271021	0.882	0.685	IPC-div2	HNRNPA3
0.00619211	0.271893	0.667	0.436	IPC-div2	CNTRL
0.000220727	0.27331	0.725	0.434	IPC-div2	NUP214
0.00842596	0.274054	0.588	0.358	IPC-div2	RNF38
5.93e-05	0.275436	0.706	0.419	IPC-div2	RPS20P14
0.00754022	0.276173	0.275	0.124	IPC-div2	PBX3
0.00950384	0.276353	0.529	0.302	IPC-div2	NUMA1
0.00552683	0.276865	0.922	0.729	IPC-div2	FAU
0.00168043	0.27698	0.608	0.349	IPC-div2	PHLDA1
0.000880458	0.276999	0.569	0.298	IPC-div2	SMAD5
0.000406382	0.277382	0.961	0.744	IPC-div2	HNRNPK
0.00810249	0.278011	0.373	0.192	IPC-div2	TMEM128
0.000518578	0.278326	0.51	0.273	IPC-div2	WASF2
4.32e-05	0.279934	0.922	0.678	IPC-div2	POU3F3
0.00433277	0.280286	0.647	0.452	IPC-div2	TCEB1
0.00840682	0.282503	0.549	0.357	IPC-div2	PSMD2
0.00726337	0.282804	0.608	0.386	IPC-div2	RP3.417G15.1
0.000386198	0.285099	0.706	0.408	IPC-div2	HSPA4
0.00146195	0.286847	0.843	0.652	IPC-div2	ILF2
0.00287404	0.287411	0.627	0.372	IPC-div2	USP10
0.00689387	0.287961	0.725	0.5	IPC-div2	XRN2
0.00387743	0.289151	0.294	0.146	IPC-div2	PTMAP4
0.00388028	0.290119	0.373	0.178	IPC-div2	CCDC144CP
0.00525763	0.291839	0.294	0.122	IPC-div2	CHMP1A
0.00674686	0.294182	0.392	0.207	IPC-div2	CSGALNACT2
0.00189804	0.298691	0.608	0.345	IPC-div2	KIAA0922
4.31e-05	0.298816	0.686	0.39	IPC-div2	SRI
0.00516533	0.299153	0.569	0.328	IPC-div2	NR2C2
0.00288632	0.300093	0.294	0.143	IPC-div2	AC019097.7
0.00720134	0.301106	0.451	0.247	IPC-div2	UFSP2
0.000114511	0.301217	0.412	0.331	IPC-div2	ZNF300
0.000204929	0.301729	0.922	0.845	IPC-div2	HNRNPA1P48
2.07e-11	0.304608	0.961	0.643	IPC-div2	EZR
0.00241084	0.305876	0.49	0.313	IPC-div2	POLR2G
0.000541387	0.305968	0.745	0.472	IPC-div2	IPO9
0.000121854	0.306125	0.667	0.409	IPC-div2	RP5.1085F17.3
0.00309727	0.306926	0.412	0.19	IPC-div2	DKFZP667B1610
0.000874227	0.30709	0.569	0.306	IPC-div2	DGCR8
0.00139144	0.307966	0.529	0.269	IPC-div2	CCDC88C
0.00377832	0.30839	0.706	0.455	IPC-div2	THAP5
9.33e-08	0.308803	0.686	0.303	IPC-div2	MDK
0.000395506	0.308897	0.373	0.144	IPC-div2	RP11.76I14.1
0.000109766	0.311326	0.745	0.432	IPC-div2	FAM213A
0.0047107	0.311749	0.941	0.853	IPC-div2	RPL8
0.00651175	0.311928	0.922	0.788	IPC-div2	BCLAF1
0.00189322	0.312592	0.549	0.297	IPC-div2	CDO1
5.32e-05	0.312884	0.373	0.124	IPC-div2	ASRGL1
0.000685166	0.31291	0.608	0.333	IPC-div2	TXNRD1
0.000120886	0.31301	1	0.905	IPC-div2	RPLP1
1.99e-05	0.314782	0.902	0.607	IPC-div2	RDX
0.00876222	0.314935	0.373	0.206	IPC-div2	F2R
0.000795548	0.315273	0.549	0.277	IPC-div2	RBM17
0.000212925	0.317362	0.588	0.289	IPC-div2	SMAD9
0.00159245	0.320252	0.784	0.531	IPC-div2	ROCK1
0.00109118	0.321217	0.51	0.274	IPC-div2	SPPL2A
0.000563717	0.322542	0.627	0.344	IPC-div2	HERC2P9
0.00032683	0.322693	0.608	0.323	IPC-div2	SNRNP40
7.62e-07	0.324159	0.627	0.272	IPC-div2	SNRPGP10
0.00690868	0.324191	0.647	0.42	IPC-div2	SSBP1
0.00997692	0.325042	0.333	0.147	IPC-div2	C6orf203
0.00169869	0.326355	0.471	0.234	IPC-div2	MRE11A
6.23e-05	0.327441	0.686	0.505	IPC-div2	TMEM258
0.00166557	0.327531	0.569	0.322	IPC-div2	MED4
0.00973472	0.328585	0.431	0.24	IPC-div2	KCTD3
0.00135792	0.329029	0.647	0.373	IPC-div2	ACP1
0.000417959	0.329276	0.255	0.07	IPC-div2	CHRNA7
0.000140601	0.329913	0.941	0.843	IPC-div2	PPIA
0.000815612	0.330086	0.49	0.28	IPC-div2	REEP3
0.00121111	0.330288	0.333	0.125	IPC-div2	ADH5P4
2.33e-06	0.330409	0.745	0.375	IPC-div2	RANP1
4.57e-07	0.331923	0.98	0.984	IPC-div2	SET
7.78e-07	0.334043	1	0.883	IPC-div2	RPS24
0.00388669	0.336028	0.471	0.258	IPC-div2	STX16
0.000343944	0.336754	0.922	0.696	IPC-div2	RPS26
1.32e-06	0.337697	0.902	0.643	IPC-div2	ARID1A
0.00242109	0.338674	0.922	0.802	IPC-div2	MYL6
0.000138228	0.3391	0.765	0.522	IPC-div2	LBR
1.49e-05	0.339382	0.941	0.683	IPC-div2	MAPK1IP1L
0.00186959	0.339925	0.725	0.519	IPC-div2	SEC63
4.03e-08	0.340013	0.941	0.806	IPC-div2	NAP1L1
0.0016498	0.341922	0.275	0.092	IPC-div2	RP1.104O17.1
1.67e-08	0.342136	0.824	0.507	IPC-div2	FABP5P7
0.000369099	0.342459	0.49	0.223	IPC-div2	EIF4A3
0.00902668	0.342564	0.647	0.427	IPC-div2	UBE2E3
0.00947842	0.342604	0.275	0.106	IPC-div2	MIS12
0.00180637	0.343296	0.922	0.704	IPC-div2	SRSF7
0.000239261	0.344511	0.882	0.614	IPC-div2	SHFM1
0.0075904	0.34507	0.882	0.684	IPC-div2	COX6C
4.86e-05	0.348452	0.667	0.401	IPC-div2	CSNK2B
0.00627452	0.350277	0.275	0.113	IPC-div2	SP2
1.73e-07	0.350646	0.706	0.381	IPC-div2	KPNA2
0.000909677	0.351151	0.98	0.945	IPC-div2	RPS14
7.6e-05	0.352002	0.804	0.522	IPC-div2	SLIRP
0.00033155	0.352257	0.588	0.323	IPC-div2	RFC1
1.24e-07	0.353771	0.824	0.569	IPC-div2	CHD7
0.00288473	0.355133	0.588	0.338	IPC-div2	DERL2
0.00797391	0.357091	0.353	0.168	IPC-div2	DAZAP1
0.00851465	0.358791	0.255	0.129	IPC-div2	PCBD2
3.28e-05	0.358921	0.647	0.343	IPC-div2	CACNA2D1
0.000439219	0.358998	0.824	0.646	IPC-div2	SLC25A6
8.08e-05	0.359575	0.706	0.392	IPC-div2	CCT5
0.00126899	0.359594	0.412	0.231	IPC-div2	BCOR
0.00415677	0.360015	0.706	0.456	IPC-div2	ATXN10
0.00267823	0.360601	0.49	0.25	IPC-div2	DNAJC15
6.74e-05	0.36097	0.863	0.567	IPC-div2	GABARAP
0.00113101	0.361014	0.549	0.293	IPC-div2	FEM1C
9.95e-05	0.362316	0.882	0.6	IPC-div2	EID1
0.00163062	0.36265	0.49	0.264	IPC-div2	LRRC37A4P
0.00418638	0.36289	0.392	0.19	IPC-div2	EIF3G
0.00194268	0.363888	0.412	0.186	IPC-div2	RNGTT
2.53e-05	0.364561	0.392	0.133	IPC-div2	ARHGAP33
0.000566274	0.364575	0.686	0.47	IPC-div2	DENND5B
0.00150227	0.36555	0.922	0.703	IPC-div2	NCL
0.00685586	0.365559	0.49	0.27	IPC-div2	LSM8
0.000968397	0.366422	0.451	0.231	IPC-div2	CARD8
0.00760962	0.366778	0.431	0.222	IPC-div2	DDX55
0.00324064	0.367315	0.333	0.134	IPC-div2	PLXNB2
0.000441263	0.36847	0.922	0.686	IPC-div2	CASP2
0.00196562	0.370361	0.627	0.386	IPC-div2	XIST
0.000213749	0.370706	0.784	0.567	IPC-div2	ZMIZ1
0.00389522	0.370876	0.353	0.155	IPC-div2	ZNF682
0.000103313	0.371556	0.549	0.248	IPC-div2	NUP85
0.00881525	0.372094	0.471	0.284	IPC-div2	LINC00493
5.33e-05	0.373357	0.314	0.128	IPC-div2	FAM149B1
0.00110953	0.373862	0.431	0.193	IPC-div2	PHACTR2
0.00383646	0.374685	0.706	0.509	IPC-div2	PNN
0.000347834	0.374704	0.294	0.093	IPC-div2	ZNF90
0.000323692	0.375519	0.882	0.616	IPC-div2	RAD21
0.00231785	0.376001	0.275	0.094	IPC-div2	FAM60CP
1.64e-06	0.376517	0.412	0.117	IPC-div2	DLEU1
0.00559254	0.37684	0.353	0.155	IPC-div2	AC024560.3
0.000269361	0.377307	0.902	0.721	IPC-div2	SKA2
0.000235328	0.37775	0.784	0.5	IPC-div2	XPO1
0.0006093	0.378745	0.922	0.701	IPC-div2	BAZ2B
0.000419963	0.381131	0.451	0.193	IPC-div2	SLC25A37
0.00670867	0.38381	0.569	0.336	IPC-div2	PRPF6
0.00517893	0.386351	0.941	0.767	IPC-div2	ADNP
5.49e-05	0.387457	0.941	0.742	IPC-div2	DAAM1
5.37e-05	0.388847	0.392	0.136	IPC-div2	EMX2
0.000330082	0.389988	0.608	0.335	IPC-div2	PARP2
1.95e-09	0.390407	0.98	0.788	IPC-div2	CBX5
0.00476611	0.391219	0.725	0.477	IPC-div2	LSM14A
0.00826353	0.392611	0.902	0.721	IPC-div2	TCERG1
0.00371341	0.394182	0.373	0.182	IPC-div2	CTC.359D24.3
4.55e-05	0.394278	0.588	0.284	IPC-div2	RP11.436D23.1
0.0019224	0.394846	0.824	0.578	IPC-div2	CIRBP
0.00473111	0.395159	0.451	0.224	IPC-div2	RALY
0.00203651	0.395914	0.255	0.126	IPC-div2	NOTCH3
0.000490849	0.39619	1	0.996	IPC-div2	ACTB
0.000427838	0.398826	0.941	0.824	IPC-div2	XRCC5
0.00775656	0.399012	0.294	0.12	IPC-div2	ZNF713
0.00450001	0.400729	0.784	0.546	IPC-div2	PARK7
2.34e-06	0.401335	0.745	0.376	IPC-div2	CDKAL1
4.36e-05	0.403362	0.824	0.545	IPC-div2	EEF1B2
0.00198816	0.404132	0.255	0.08	IPC-div2	TIPIN
0.00556929	0.405022	0.824	0.62	IPC-div2	HNRNPH3
0.00111568	0.407052	0.686	0.435	IPC-div2	CTBP2
0.00190293	0.408078	0.706	0.523	IPC-div2	AC016739.2
3.27e-06	0.408834	0.706	0.48	IPC-div2	VEZF1
0.00138059	0.409191	0.333	0.124	IPC-div2	MIS18A
0.000826471	0.410365	0.824	0.587	IPC-div2	GDI1
5.33e-05	0.41176	0.49	0.209	IPC-div2	IGF2BP3
5.23e-07	0.411983	0.922	0.654	IPC-div2	RQCD1
2.13e-05	0.412313	0.706	0.365	IPC-div2	AASS
0.00613958	0.414384	0.275	0.104	IPC-div2	NPY
0.00292358	0.414958	0.647	0.42	IPC-div2	CEP97
2.71e-05	0.41701	0.549	0.236	IPC-div2	DBF4
0.000272026	0.417036	0.608	0.31	IPC-div2	PIK3R3
0.00127939	0.417404	0.431	0.209	IPC-div2	RBM15B
0.000120247	0.417407	0.549	0.265	IPC-div2	PPP2R3C
0.00539308	0.417556	0.686	0.44	IPC-div2	DAD1
0.00187399	0.417594	0.529	0.274	IPC-div2	RAP1B
0.00262162	0.418145	0.627	0.481	IPC-div2	RP11.734J24.1
0.00291839	0.419114	0.51	0.265	IPC-div2	PDE7A
0.00261164	0.422008	0.902	0.693	IPC-div2	SPAG9
0.000234847	0.422269	0.902	0.638	IPC-div2	CPSF6
0.00113588	0.422949	0.314	0.138	IPC-div2	GPR180
0.00212841	0.42311	0.49	0.262	IPC-div2	RAD23A
0.00149192	0.423397	0.451	0.208	IPC-div2	NAB1
0.000734709	0.4267	0.431	0.21	IPC-div2	PPM1G
2.66e-07	0.427535	0.804	0.455	IPC-div2	ELAVL4
1.83e-05	0.42822	0.863	0.565	IPC-div2	CCDC14
0.00380978	0.42856	0.353	0.221	IPC-div2	GLRX3
0.000303581	0.430219	0.902	0.655	IPC-div2	FUS
3.39e-05	0.431185	0.784	0.459	IPC-div2	PA2G4
0.000127854	0.431649	0.373	0.125	IPC-div2	CCDC34
0.00788722	0.432762	0.314	0.129	IPC-div2	SERPING1
0.000102145	0.433212	0.392	0.145	IPC-div2	SALL1
9.54e-08	0.433893	0.863	0.568	IPC-div2	FABP5
1.08e-05	0.435558	0.98	0.832	IPC-div2	PTMAP5
1.07e-06	0.435665	0.588	0.234	IPC-div2	PSAT1
0.00670331	0.437377	0.686	0.452	IPC-div2	FADS1
1.42e-05	0.437506	0.765	0.429	IPC-div2	ACLY
0.000128202	0.438528	0.745	0.432	IPC-div2	SLC4A7
0.000581576	0.439126	0.392	0.157	IPC-div2	ELMOD2
2.65e-07	0.441375	0.902	0.57	IPC-div2	GOLIM4
0.000981973	0.442118	0.294	0.176	IPC-div2	SETD3
1.75e-06	0.442385	0.863	0.535	IPC-div2	ALDOA
9.39e-06	0.442474	0.373	0.105	IPC-div2	NSMCE4A
0.00349422	0.442654	0.275	0.121	IPC-div2	ERI1
0.000210038	0.443338	0.608	0.309	IPC-div2	NETO2
0.000445917	0.443491	0.667	0.382	IPC-div2	DCP2
0.00369935	0.444421	0.275	0.114	IPC-div2	AIF1L
0.00150131	0.44515	0.784	0.52	IPC-div2	XRCC6
0.00276868	0.445309	0.549	0.305	IPC-div2	SPCS3
0.00487887	0.44679	0.353	0.163	IPC-div2	ASCL1
0.000220197	0.448483	0.863	0.588	IPC-div2	CHCHD2
1.54e-08	0.449037	0.922	0.629	IPC-div2	TMSB15A
3.31e-05	0.449968	0.765	0.605	IPC-div2	SETBP1
0.000676823	0.452541	0.627	0.365	IPC-div2	NUCB2
0.00570941	0.452887	0.627	0.44	IPC-div2	CYCS
2.56e-05	0.453172	0.569	0.253	IPC-div2	RBMXP2
0.0042096	0.456952	0.255	0.086	IPC-div2	KDELC2
2.6e-05	0.457711	0.745	0.451	IPC-div2	CCT7
0.00521019	0.457921	0.471	0.24	IPC-div2	POLDIP3
5.59e-05	0.458163	0.627	0.307	IPC-div2	GPR125
6.02e-05	0.458823	0.863	0.718	IPC-div2	PRDX2
7.37e-05	0.459238	0.51	0.224	IPC-div2	CEP192
0.00340228	0.459697	0.431	0.205	IPC-div2	RP11.473N11.2
0.00117925	0.460813	0.686	0.409	IPC-div2	SF1
6.33e-06	0.461306	0.863	0.584	IPC-div2	SRSF2
0.00149065	0.461866	0.49	0.238	IPC-div2	NAA38
4.43e-08	0.465079	0.569	0.191	IPC-div2	HIST1H2BD
7.34e-06	0.465305	0.824	0.594	IPC-div2	MYH10
0.000153881	0.465363	0.647	0.369	IPC-div2	PPME1
0.000684613	0.465526	0.784	0.509	IPC-div2	NUPL1
0.00435141	0.465695	0.471	0.344	IPC-div2	MEGF9
0.000816182	0.465864	0.588	0.31	IPC-div2	PSD3
0.00889569	0.466719	0.706	0.508	IPC-div2	MRPL42
1.03e-05	0.467812	0.529	0.205	IPC-div2	RNASEH2B
0.00507652	0.468789	0.529	0.291	IPC-div2	DNAJC13
0.00183813	0.468922	0.667	0.411	IPC-div2	MMP16
0.00232256	0.469405	0.392	0.183	IPC-div2	USP39
0.0040916	0.470903	0.608	0.432	IPC-div2	ZNF106
0.00341692	0.471029	0.392	0.174	IPC-div2	NCSTN
0.000508027	0.471236	0.824	0.555	IPC-div2	CD47
0.000364451	0.471594	0.745	0.452	IPC-div2	C12orf57
0.000604922	0.474256	0.824	0.586	IPC-div2	CCT6A
0.00555123	0.47588	0.333	0.138	IPC-div2	PLEKHG4B
0.00556686	0.475982	0.745	0.523	IPC-div2	QRICH1
1.31e-05	0.475985	0.314	0.078	IPC-div2	AC013727.1
0.00132409	0.476155	0.608	0.338	IPC-div2	MYO6
5.76e-06	0.476572	0.941	0.742	IPC-div2	TMSB4XP1
0.00314106	0.477168	0.686	0.524	IPC-div2	SNRPF
0.00709274	0.478515	0.373	0.169	IPC-div2	ZNF143
0.00441172	0.47853	0.529	0.287	IPC-div2	RAE1
1.24e-06	0.478694	0.863	0.507	IPC-div2	ENO1
0.00108616	0.47908	0.569	0.317	IPC-div2	GABPB1
0.00986014	0.479625	0.667	0.442	IPC-div2	KDM1A
0.000676801	0.479958	0.647	0.361	IPC-div2	PCNT
0.000214247	0.479991	0.51	0.225	IPC-div2	FBL
8.52e-05	0.480935	0.51	0.215	IPC-div2	PTPRK
0.001	0.48107	0.588	0.099	IPC-div2	UBE2C
0.000488725	0.481343	0.765	0.479	IPC-div2	CS
0.000138714	0.482243	0.51	0.224	IPC-div2	COX17
0.000511236	0.482891	0.294	0.089	IPC-div2	RBBP9
0.00465909	0.483435	0.804	0.663	IPC-div2	KHDRBS1
4.22e-07	0.483528	0.569	0.25	IPC-div2	TMEM209
3.63e-06	0.485525	0.784	0.419	IPC-div2	RSRC1
8.62e-09	0.486037	0.314	0.048	IPC-div2	C5orf34
0.000251782	0.487695	0.647	0.352	IPC-div2	VBP1
6.59e-08	0.487703	0.706	0.297	IPC-div2	AHI1
0.00252573	0.487788	0.569	0.316	IPC-div2	CEP78
0.00022163	0.489093	0.627	0.359	IPC-div2	SPCS2P4
0.00032243	0.489134	0.725	0.443	IPC-div2	SOGA1
1.48e-10	0.489213	0.98	0.928	IPC-div2	HNRNPA2B1
0.000348206	0.489484	0.804	0.536	IPC-div2	EIF5B
0.00383249	0.489711	0.51	0.273	IPC-div2	PDHA1
0.00034114	0.492145	0.392	0.21	IPC-div2	PROSER1
0.00270269	0.492145	0.608	0.347	IPC-div2	UTP11L
4.87e-05	0.493819	0.569	0.253	IPC-div2	NUP188
5.96e-06	0.494753	0.431	0.141	IPC-div2	TWSG1
0.00641513	0.494753	0.49	0.266	IPC-div2	RAB8A
0.000622111	0.495525	0.49	0.232	IPC-div2	MARCH1
0.00305202	0.497296	0.275	0.104	IPC-div2	MED12L
0.000822424	0.497307	0.353	0.133	IPC-div2	CCNK
0.0010836	0.497514	0.51	0.247	IPC-div2	NFE2L2
2.09e-14	0.497625	0.373	0.039	IPC-div2	HIST1H3I
0.000548706	0.49774	0.706	0.421	IPC-div2	UBE2G2
7.85e-05	0.501577	0.51	0.214	IPC-div2	FNIP2
0.009761	0.502407	0.529	0.31	IPC-div2	PKD2
1.86e-06	0.503112	0.647	0.412	IPC-div2	HMGB1P1
8.98e-12	0.505075	0.882	0.399	IPC-div2	C3orf70
0.00692674	0.505655	0.647	0.42	IPC-div2	DDAH2
4.64e-05	0.506005	0.451	0.175	IPC-div2	CIPC
1.13e-06	0.506505	0.98	0.919	IPC-div2	H3F3A
5.43e-07	0.507711	0.647	0.273	IPC-div2	CDON
1.64e-11	0.507881	1	0.969	IPC-div2	TMSB4X
4.18e-06	0.509986	0.824	0.476	IPC-div2	NDUFA6
0.00554241	0.510989	0.686	0.447	IPC-div2	COX8A
4.03e-05	0.511005	0.51	0.207	IPC-div2	CDK6
0.00422349	0.511717	0.686	0.455	IPC-div2	FGD5.AS1
0.000170971	0.512983	0.627	0.321	IPC-div2	C4orf27
0.00463254	0.513096	0.373	0.17	IPC-div2	ALAS1
1.22e-07	0.513241	0.863	0.606	IPC-div2	EIF4EBP2
0.00929713	0.513557	0.529	0.337	IPC-div2	TALDO1
0.00843723	0.515422	0.431	0.244	IPC-div2	SUMO3
2.78e-09	0.515809	0.765	0.401	IPC-div2	NUP155
3.41e-06	0.517036	0.314	0.071	IPC-div2	XRCC4
9.77e-11	0.518	0.961	0.752	IPC-div2	PHIP
0.00772777	0.519925	0.529	0.298	IPC-div2	TUFM
1.37e-06	0.520867	0.824	0.455	IPC-div2	PET100
0.00164816	0.521313	0.804	0.555	IPC-div2	NDUFB2
0.00184467	0.52417	0.667	0.399	IPC-div2	CGGBP1
2.06e-07	0.524287	0.784	0.473	IPC-div2	SPCS2
0.00129669	0.526855	0.353	0.134	IPC-div2	C5orf22
1.49e-07	0.527303	0.549	0.204	IPC-div2	ZHX3
3.85e-05	0.527595	0.255	0.059	IPC-div2	ZNF492
0.000232914	0.527729	0.784	0.486	IPC-div2	POU2F1
2.77e-05	0.528902	0.667	0.345	IPC-div2	TEAD1
0.0003312	0.52892	0.294	0.092	IPC-div2	TEX9
0.000150031	0.528937	0.549	0.263	IPC-div2	CCDC167
1.15e-05	0.529975	0.373	0.108	IPC-div2	ZNF718
0.000589788	0.531752	0.353	0.206	IPC-div2	STXBP4
0.000175977	0.53206	0.725	0.485	IPC-div2	STT3A
0.00174764	0.532756	0.451	0.217	IPC-div2	KNOP1
0.00117306	0.532991	0.392	0.161	IPC-div2	FANCM
7.91e-11	0.53328	0.51	0.116	IPC-div2	SGOL2
0.000604089	0.533941	0.529	0.258	IPC-div2	MBNL1
1.3e-05	0.534651	0.627	0.296	IPC-div2	CREB5
0.00467463	0.53497	0.451	0.246	IPC-div2	AP3M1
0.00363814	0.535057	0.451	0.244	IPC-div2	PI4KAP2
0.00184044	0.535101	0.686	0.425	IPC-div2	ROMO1
0.00211015	0.535866	0.275	0.098	IPC-div2	GPAA1
3.32e-05	0.535949	0.471	0.178	IPC-div2	SEPT10
2.5e-07	0.536074	0.745	0.36	IPC-div2	TOMM5
4.16e-12	0.536422	0.451	0.079	IPC-div2	HMGN2P6
0.000585905	0.537715	0.922	0.688	IPC-div2	HINT1
0.00192643	0.538602	0.529	0.271	IPC-div2	WBP4
1.38e-06	0.538689	0.863	0.594	IPC-div2	SF3B2
0.00221942	0.538734	0.549	0.291	IPC-div2	NHLRC2
0.00716654	0.538766	0.745	0.586	IPC-div2	TNPO2
2.85e-08	0.539352	0.686	0.319	IPC-div2	TP53
0.0010102	0.539562	0.49	0.236	IPC-div2	TMEM97
0.000198763	0.539564	0.471	0.2	IPC-div2	KHSRP
7.49e-11	0.540216	0.902	0.714	IPC-div2	LDHB
3.96e-06	0.542538	0.804	0.462	IPC-div2	LSM3
0.00685337	0.544385	0.275	0.107	IPC-div2	ZNF826P
7.31e-06	0.544816	0.431	0.138	IPC-div2	COMMD4
4.32e-07	0.545291	0.725	0.369	IPC-div2	SNRPD3
9.69e-07	0.54552	0.961	0.859	IPC-div2	RBMX
2.33e-08	0.546115	0.863	0.618	IPC-div2	KPNB1
0.00283206	0.546188	0.529	0.301	IPC-div2	DHX8
0.00600831	0.546585	0.608	0.366	IPC-div2	ENO2
0.00897748	0.547233	0.471	0.251	IPC-div2	MLH1
2.22e-07	0.547313	0.922	0.637	IPC-div2	PCBP2
6.66e-09	0.547376	0.431	0.117	IPC-div2	HMGN2P4
0.00013347	0.547614	0.588	0.31	IPC-div2	SNHG1
2.67e-06	0.547903	0.686	0.319	IPC-div2	C14orf132
0.00712508	0.547951	0.431	0.234	IPC-div2	GNB4
5.53e-06	0.54966	0.745	0.5	IPC-div2	PSMA4
1.03e-07	0.549688	0.941	0.722	IPC-div2	LINC01158
0.00538457	0.551266	0.412	0.196	IPC-div2	CCNY
2.86e-06	0.552031	0.686	0.36	IPC-div2	SSRP1
0.00470643	0.552734	0.353	0.15	IPC-div2	U2AF2
0.00175173	0.553089	0.294	0.144	IPC-div2	RANBP17
0.00682205	0.553129	0.294	0.117	IPC-div2	BCS1L
3.45e-06	0.553191	0.902	0.642	IPC-div2	PRKDC
0.00535409	0.55327	0.431	0.248	IPC-div2	KIAA1731
2.09e-05	0.553473	0.451	0.171	IPC-div2	DAXX
0.00480261	0.55516	0.431	0.279	IPC-div2	FIBP
2.74e-05	0.555164	0.922	0.744	IPC-div2	TUBBP1
0.00748395	0.555178	0.412	0.2	IPC-div2	AARS
4.23e-05	0.55682	0.863	0.59	IPC-div2	RIF1
0.00022131	0.558114	0.529	0.248	IPC-div2	KIAA1143
0.00222032	0.558187	0.569	0.33	IPC-div2	SF3A3
0.00216166	0.559165	0.549	0.32	IPC-div2	SUGP2
0.00416455	0.561599	0.569	0.361	IPC-div2	ADH5
5.61e-14	0.566205	0.588	0.124	IPC-div2	WDHD1
1.17e-10	0.56696	0.961	0.744	IPC-div2	NFIA
0.00164792	0.567576	0.686	0.447	IPC-div2	PARP1
0.00137214	0.568299	0.686	0.416	IPC-div2	ITGB1
7.68e-05	0.568701	0.922	0.723	IPC-div2	CHCHD3
0.00247864	0.568731	0.471	0.228	IPC-div2	NSL1
0.000214733	0.57054	0.333	0.106	IPC-div2	PIN1
0.00355831	0.571148	0.333	0.134	IPC-div2	STK17A
2.74e-06	0.571757	0.843	0.488	IPC-div2	BANF1
0.00254775	0.572503	0.275	0.092	IPC-div2	MTBP
3.27e-05	0.574674	0.373	0.116	IPC-div2	NDE1
0.000186046	0.57485	0.529	0.245	IPC-div2	TCF3
6.26e-09	0.577116	0.784	0.362	IPC-div2	BBX
0.00405474	0.577968	0.373	0.162	IPC-div2	SAAL1
2.85e-05	0.581432	0.667	0.349	IPC-div2	ELAVL2
4.1e-10	0.581878	0.961	0.704	IPC-div2	SMC3
0.00546538	0.5822	0.49	0.279	IPC-div2	KIF20B
5.91e-06	0.582943	0.882	0.685	IPC-div2	GSTP1
0.000214663	0.583202	0.667	0.388	IPC-div2	HDLBP
2.34e-05	0.583404	0.588	0.264	IPC-div2	JKAMP
7.94e-05	0.583905	0.471	0.203	IPC-div2	SHROOM3
0.000990889	0.584134	0.333	0.127	IPC-div2	CDK10
1.49e-05	0.586054	0.471	0.169	IPC-div2	LRRCC1
0.00490295	0.586442	0.392	0.192	IPC-div2	ALG5
0.000204323	0.586965	0.941	0.856	IPC-div2	H3F3AP4
2.13e-13	0.58861	0.784	0.273	IPC-div2	CKS2
0.00128684	0.589265	0.824	0.564	IPC-div2	RNPS1
6.97e-08	0.590051	1	0.939	IPC-div2	TUBB
3.65e-07	0.591221	0.804	0.438	IPC-div2	QSER1
0.0021867	0.592388	0.725	0.477	IPC-div2	MSH6
1.23e-08	0.592388	1	0.992	IPC-div2	PTMA
0.0032793	0.592504	0.529	0.286	IPC-div2	C12orf65
0.000354506	0.592649	0.824	0.626	IPC-div2	H3F3AP6
0.00118963	0.59272	0.608	0.341	IPC-div2	UBA2
2.04e-06	0.592968	0.922	0.745	IPC-div2	NUCKS1
6.22e-14	0.593052	0.588	0.153	IPC-div2	ASPM
1.3e-05	0.594527	0.824	0.528	IPC-div2	MSI1
0.00070785	0.594775	0.471	0.21	IPC-div2	MPHOSPH9
0.00241518	0.595008	0.49	0.248	IPC-div2	NFYC
0.00233302	0.595071	0.725	0.476	IPC-div2	PRKD3
0.00681935	0.595546	0.471	0.252	IPC-div2	USP46
2.38e-11	0.596857	0.824	0.349	IPC-div2	LHX2
6.14e-05	0.598287	0.373	0.125	IPC-div2	THOC3
0.000828089	0.598383	0.627	0.345	IPC-div2	MRPL33
3.33e-16	0.598598	0.49	0.057	IPC-div2	HIST1H3C
4.84e-08	0.599027	0.569	0.187	IPC-div2	TBC1D1
4.51e-07	0.599536	0.784	0.557	IPC-div2	PTMAP2
4.49e-07	0.599855	0.804	0.489	IPC-div2	ZNF738
0.000158472	0.602016	0.686	0.4	IPC-div2	HNRNPM
0.00144064	0.602429	0.627	0.354	IPC-div2	SPCS1
0.00216832	0.603104	0.431	0.205	IPC-div2	MCPH1
0.000508	0.603256	0.314	0.113	IPC-div2	GSTCD
0.00233505	0.60339	0.392	0.176	IPC-div2	EIF2B1
0.000341802	0.603657	0.569	0.314	IPC-div2	FAM127A
1.17e-05	0.605839	0.392	0.119	IPC-div2	MGME1
0.00454773	0.606233	0.529	0.29	IPC-div2	TTC21B
0.00460551	0.607005	0.51	0.276	IPC-div2	SNX3
0.000488147	0.607463	0.549	0.289	IPC-div2	TRIM26
5.02e-09	0.60747	0.98	0.846	IPC-div2	NNAT
0.000486213	0.607612	0.725	0.474	IPC-div2	NOP56
1.77e-05	0.610549	0.275	0.062	IPC-div2	KIF20A
1.1e-08	0.611298	0.824	0.444	IPC-div2	BUB3
0.00252578	0.612751	0.549	0.301	IPC-div2	UBTF
8.51e-06	0.613141	0.529	0.206	IPC-div2	LZTS1
9.33e-07	0.613801	0.824	0.48	IPC-div2	ERH
2.4e-07	0.614011	0.765	0.386	IPC-div2	ZFHX4
3.94e-05	0.615058	0.627	0.318	IPC-div2	WAPAL
0.00488793	0.617468	0.51	0.338	IPC-div2	KDM3B
4.78e-09	0.619732	0.765	0.323	IPC-div2	ZEB1
9.01e-05	0.619792	0.529	0.236	IPC-div2	CDK11B
2.26e-06	0.621595	0.529	0.197	IPC-div2	TMTC2
3.29e-10	0.624961	0.725	0.297	IPC-div2	CENPJ
0.000337495	0.625172	0.275	0.095	IPC-div2	CDKN3
5.22e-09	0.62639	0.667	0.249	IPC-div2	GNG4
1.35e-05	0.627857	0.725	0.382	IPC-div2	CTCF
1.46e-05	0.62796	0.863	0.68	IPC-div2	RAN
5.25e-05	0.628207	0.431	0.162	IPC-div2	ATRAID
3.93e-05	0.62831	0.627	0.3	IPC-div2	RPA2
[truncated: 12,132 more rows]

## Sheet: C. ClusterMarkerCorrelation
Calculated using Human_clustersmarkers obtained from Nowakowski et al., 2017 (sm-tables-s1-11)
PearsonCorrelation	RG-early	RG-div1	RG-div2	oRG	vRG	tRG	IPC-div1	IPC-div2	IPC-nEN1	IPC-nEN2	IPC-nEN3	OPC	Astrocyte
F_earlyRG1	0.869726	0.337961	0.289959	0.30849	0.630164	0.451596	0.175915	0.209883	0.0620665	-0.414674	0.470206	0.822862	0.557301
F_earlyRG2	0.792405	0.511107	0.419718	0.294761	0.448464	0.27586	0.267582	0.610277	0.430224	0.0278131	0.483715	0.849602	0.60211
F_earlyRG3	0.505852	0.672713	0.182882	0.0500462	0.491994	-0.0220244	0.714139	0.406035	-0.0751207	-0.319305	0.436883	0.573339	0.332707
F_midRG	0.327508	0.459483	0.527258	0.417587	0.618702	0.582688	-0.0342027	0.190765	-0.12075	-0.432994	0.31541	0.373903	0.283591
F_lateRG1	-0.0295603	0.367675	0.396785	0.631408	0.507657	0.396713	-0.067275	0.196555	-0.315695	-0.117632	0.135331	0.398384	0.528476
F_lateRG2	0.436831	0.641549	0.0658148	0.00589647	0.583675	-0.0977601	0.710036	0.367242	-0.36345	-0.28167	-0.0653374	0.132964	0.196468
F_lateRG3	0.39298	0.633882	0.367383	0.296057	0.567817	0.0395003	0.452349	0.624972	-0.0275888	-0.20842	-0.0167914	0.123221	0.285543
F_tRG	0.119032	0.182166	0.371349	0.471698	0.401554	0.696464	-0.035081	0.209383	-0.403856	-0.163458	0.10053	0.340025	0.331846
F_IPC1	-0.217651	-0.1318	-0.31764	-0.224925	-0.19181	-0.23383	0.668205	0.62318	0.69561	0.90646	0.72941	-0.246087	-0.18575
F_IPC2	0.494202	0.508601	0.592623	0.0824213	0.0856973	-0.0602097	0.305733	0.718834	0.880809	0.60246	0.866793	0.164185	-0.00848027
F_IPC3	0.563841	0.653154	0.196485	-0.190266	0.12111	-0.160952	0.737577	0.299668	0.792323	0.30719	0.788345	-0.0554028	-0.159166
F_OPC	-0.251958	0.0663291	0.0151626	0.496904	0.359779	0.154074	0.257191	-0.415966	0.243348	-0.275254	0.0949946	0.803316	0.360954
F_Ependymal	-0.0111758	0.0624459	0.0892525	0.487796	0.255457	0.0738638	0.0660035	0.16301	-0.406062	0.454782	0.257756	0.925035	0.155075
p-value	RG-early	RG-div1	RG-div2	oRG	vRG	tRG	IPC-div1	IPC-div2	IPC-nEN1	IPC-nEN2	IPC-nEN3	OPC	Astrocyte
F_earlyRG1	1.2884e-42	3.48582e-06	8.63823e-05	0.000355821	9.39817e-07	4.57965e-07	0.167862	0.0214042	0.773264	0.00963841	0.000255555	1.43519e-06	0.000339643
F_earlyRG2	4.86268e-37	1.43722e-20	1.78511e-12	0.000289931	0.000595103	0.00162282	0.00163634	5.81572e-25	0.035864	0.847953	0.000571974	7.76896e-08	0.0001023
F_earlyRG3	5.3309e-14	1.65443e-43	0.00431238	0.538987	7.57021e-05	0.797638	5.74424e-33	4.22409e-10	0.709599	0.0114179	0.00190492	0.00142592	0.0255421
F_midRG	0.000540399	2.29103e-11	2.03199e-15	2.65015e-08	1.32702e-10	4.19801e-15	0.793567	0.0524077	0.525035	0.000960454	0.0308058	0.0226261	0.0157777
F_lateRG1	0.772627	1.1279e-08	1.78661e-10	4.12763e-35	2.4689e-11	9.53648e-10	0.646027	0.0909981	0.04169	0.325069	0.431305	0.00052847	1.29213e-13
F_lateRG2	5.55217e-09	6.47749e-46	0.23456	0.92609	1.66396e-13	0.153144	3.97206e-36	1.17688e-08	0.0249009	0.00944138	0.72238	0.333171	0.0337495
F_lateRG3	2.64656e-08	1.04212e-50	2.7232e-14	5.47484e-07	5.64153e-13	0.556459	1.91748e-12	5.43757e-35	0.874993	0.0618755	0.923729	0.370112	0.00273955
F_tRG	0.258422	0.00674315	9.13787e-09	1.07776e-17	7.31351e-07	2.03157e-34	0.827625	0.0941387	0.00799385	0.196847	0.584071	0.00347428	6.41657e-06
F_IPC1	0.0509525	0.195783	0.00737349	0.0421916	0.104019	0.0449497	9.98849e-09	2.89092e-06	7.42328e-09	1.26256e-22	1.38517e-07	0.14205	0.148333
F_IPC2	2.29614e-08	3.01383e-18	4.70984e-24	0.38119	0.575664	0.545742	7.60982e-05	8.71346e-43	6.33424e-11	8.98752e-07	2.3818e-13	0.403794	0.960271
F_IPC3	4.212e-12	1.93613e-35	0.00565259	0.0566769	0.407136	0.104343	2.51922e-43	4.09855e-06	1.85992e-09	0.0225294	6.91196e-09	0.788074	0.339835
F_OPC	0.246133	0.668809	0.915896	8.43216e-05	0.0397326	0.362568	0.53861	0.139056	0.528072	0.240165	0.746673	4.42078e-10	0.0126809
F_Ependymal	0.917213	0.309354	0.194451	2.73411e-16	0.0134597	0.303534	0.625686	0.151176	0.0320277	0.000296159	0.154367	1.09599e-19	0.10099

## Sheet: D. common_tRG_markers
p_val	avg_diff	pct.1	pct.2	cluster	gene	tRG markers shared with ferret tRG markers were used for calculating tRG score.
4.05e-11	0.788459	0.74	0.455	tRG	JUN
0.000378736	0.258754	0.73	0.528	tRG	ARPP19
3.28e-06	0.275187	0.69	0.44	tRG	WBP5
1.58e-08	0.660903	0.37	0.124	tRG	ACYP2
0.001	1.67306	0.65	0.221	tRG	ADAM9
0.001	1.66236	0.48	0.107	tRG	AIF1L
0.00361393	0.440445	0.48	0.31	tRG	ALDH7A1
7.77e-16	0.744558	0.9	0.53	tRG	ALDOA
1.11e-16	1.48191	0.33	0.05	tRG	ANXA1
0.001	1.32282	0.67	0.13	tRG	ANXA2
0.001	1.08296	0.74	0.247	tRG	ANXA5
0.001	0.975418	0.84	0.407	tRG	ARHGAP5
0.000109105	0.409739	0.38	0.188	tRG	ARL13B
0.001	1.49261	0.76	0.166	tRG	ATP1A2
0.001	1.03003	0.93	0.376	tRG	ATP1B2
1.45e-12	0.615575	0.83	0.474	tRG	AZIN1
0.001	0.347632	0.73	0.3	tRG	B2M
0.00443967	0.961534	0.28	0.144	tRG	B3GALNT1
0.00234882	0.301863	0.37	0.213	tRG	BBIP1
0.001	1.38367	0.66	0.119	tRG	BCAN
1.24e-05	0.785109	0.39	0.175	tRG	CALCOCO2
4.44e-16	0.763347	0.87	0.502	tRG	CANX
0.000208895	0.51711	0.53	0.371	tRG	CASC4
0.001	0.681914	0.82	0.376	tRG	CD63
0.001	1.2951	0.85	0.264	tRG	CDON
1.55e-05	0.86143	0.4	0.188	tRG	CETN2
0.001	0.552494	0.98	0.715	tRG	CKB
0.000118243	0.512075	0.57	0.344	tRG	CLCN3
8.41e-07	0.407767	0.64	0.372	tRG	CLDND1
3.11e-08	0.384615	0.75	0.445	tRG	CLNS1A
0.001	2.02237	0.93	0.239	tRG	CLU
0.001	1.46948	0.96	0.755	tRG	CNN3
2.25e-07	1.01394	0.3	0.091	tRG	CNTFR
9.58e-07	0.661452	0.39	0.159	tRG	COMT
0.001	1.91919	0.95	0.284	tRG	CREB5
0.001	4.17399	0.55	0.062	tRG	CRYAB
5.7e-14	0.848212	0.79	0.415	tRG	CTNNA1
3.87e-06	0.684861	0.28	0.114	tRG	CXXC5
0.001	2.25635	0.81	0.127	tRG	CYR61
1.49e-07	0.797544	0.39	0.152	tRG	DAG1
0.001	1.16127	0.9	0.429	tRG	DBI
0.001	1.62002	0.92	0.303	tRG	DDAH1
0.000157927	0.62226	0.41	0.209	tRG	DNAJC19
0.001	1.49577	0.6	0.202	tRG	DTNA
0.00234339	0.889014	0.33	0.179	tRG	DTX4
1.72e-06	0.621383	0.57	0.307	tRG	ECH1
0.001	1.92216	0.98	0.631	tRG	EGR1
1.14e-12	0.767047	0.63	0.264	tRG	ELOVL5
0.00116722	0.369476	0.29	0.135	tRG	EMX2
3.16e-05	0.37554	0.27	0.102	tRG	ENHO
0.00601416	0.407944	0.47	0.301	tRG	EPB41L3
4.3e-08	0.483094	0.68	0.415	tRG	ERBB2IP
2.49e-13	0.92458	0.61	0.256	tRG	EVI5
0.001	1.16741	0.98	0.639	tRG	EZR
0.001	1.3986	0.97	0.562	tRG	FABP5
0.001	1.21357	0.95	0.476	tRG	FABP7
0.000664947	0.376575	0.5	0.301	tRG	FADS2
0.000433351	0.327279	0.48	0.285	tRG	FAM63B
0.001	2.23096	0.57	0.083	tRG	FAM84B
1.55e-07	0.533288	0.43	0.174	tRG	FAT1
7.14e-08	0.397322	0.58	0.291	tRG	FDPS
4.73e-07	0.381424	0.44	0.193	tRG	FEZ2
1.2e-05	0.686838	0.55	0.304	tRG	FGFR1
5.3e-14	1.01395	0.66	0.272	tRG	FGFR2
4.72e-08	0.437306	0.61	0.319	tRG	FHL1
0.001	1.6229	0.96	0.611	tRG	FOS
1.04e-10	0.330444	0.65	0.311	tRG	FUT9
2.78e-10	1.04268	0.48	0.175	tRG	GCA
0.001	2.09745	0.46	0.059	tRG	GFAP
0.001	2.29045	0.94	0.195	tRG	GLI3
8.44e-14	0.392861	0.72	0.33	tRG	GLO1
1.12e-06	0.767247	0.54	0.29	tRG	GLUD1
4.37e-07	0.302772	0.72	0.462	tRG	GLUL
0.001	1.69369	0.53	0.108	tRG	GNG12
5.29e-11	0.438937	0.64	0.293	tRG	GNG5
2.22e-16	0.430338	0.93	0.565	tRG	GOLIM4
7.01e-08	0.376538	0.6	0.312	tRG	GOLM1
1.76e-05	1.08647	0.35	0.147	tRG	GPAM
0.001	0.688327	0.97	0.703	tRG	GPM6B
0.001	2.13094	0.94	0.204	tRG	HES1
8e-11	0.722955	0.64	0.302	tRG	HIGD1A
0.001	0.931451	0.95	0.651	tRG	HMGCS1
1.11e-16	0.778493	0.92	0.545	tRG	HMGN3
1.02e-13	1.42036	0.39	0.094	tRG	HOPX
0.000200699	0.58887	0.4	0.226	tRG	HSD17B12
0.001	0.61871	0.65	0.218	tRG	HSPB1
0.00059993	0.486824	0.28	0.123	tRG	HTRA1
0.001	1.01455	0.6	0.18	tRG	IER2
1.61e-11	0.860465	0.43	0.131	tRG	IFT57
1.01e-07	0.682774	0.36	0.126	tRG	IGFBP5
4.66e-11	1.06949	0.54	0.221	tRG	IL6ST
4.47e-12	1.08889	0.35	0.081	tRG	INHBB
0.001	1.43956	0.65	0.162	tRG	IQGAP2
5.63e-10	1.25733	0.37	0.108	tRG	ITGA6
0.000494926	0.548854	0.43	0.246	tRG	ITGAV
9.12e-08	0.615667	0.71	0.412	tRG	ITGB1
0.001	1.95389	0.96	0.505	tRG	ITGB8
2.95e-05	0.594299	0.34	0.149	tRG	ITM2C
0.001	0.920374	0.67	0.26	tRG	JAM2
0.001	1.2319	0.66	0.222	tRG	JAM3
6.95e-09	0.588147	0.29	0.077	tRG	JUNB
0.001	0.877151	0.99	0.792	tRG	JUND
0.000252532	0.721169	0.49	0.291	tRG	KIF1A
9.02e-11	0.518728	0.94	0.752	tRG	KIF1B
0.001	0.816876	0.86	0.342	tRG	LHX2
0.001	0.946641	0.64	0.183	tRG	LITAF
4.62e-11	1.15793	0.48	0.168	tRG	LRIG1
2.32e-13	1.9082	0.31	0.056	tRG	LRP10
3.15e-06	0.408292	0.54	0.292	tRG	LRRC58
1.43e-13	1.30444	0.38	0.097	tRG	LRRTM3
1.4e-06	0.444537	0.66	0.389	tRG	LSAMP
2.04e-13	1.59609	0.43	0.114	tRG	MAGT1
5.06e-06	0.675326	0.37	0.155	tRG	MASP1
8.57e-12	0.836539	0.66	0.299	tRG	MDK
1.89e-15	0.588047	0.55	0.179	tRG	MFAP2
3.25e-06	0.537223	0.67	0.406	tRG	MGST3
4.2e-08	0.792686	0.31	0.093	tRG	MLC1
0.001	1.10017	0.66	0.23	tRG	MLF1
0.001	1.0495	0.91	0.522	tRG	MSMO1
3.89e-12	0.347587	0.98	0.8	tRG	MYL6
0.001	1.3289	0.75	0.332	tRG	MYO6
0.000919908	0.327649	0.42	0.236	tRG	NAA38
1.95e-13	0.657393	0.78	0.39	tRG	NADK2
0.001	0.448706	0.97	0.803	tRG	NAP1L1
1.55e-15	1.06332	0.83	0.442	tRG	NCAN
0.00029355	0.352993	0.26	0.107	tRG	NDRG2
2.4e-10	1.26229	0.32	0.077	tRG	NEK6
4.5e-06	0.360147	0.47	0.25	tRG	NEO1
0.00641243	0.315579	0.31	0.167	tRG	NFE2L1
0.001	1.44634	0.81	0.237	tRG	NFE2L2
0.001	0.542462	0.99	0.741	tRG	NFIA
0.001	1.45451	0.87	0.229	tRG	NOTCH2
0.001	1.06095	0.74	0.219	tRG	NPAS3
0.000137337	0.375458	0.73	0.512	tRG	NUDT4
0.001	1.75047	0.88	0.287	tRG	PALLD
0.001	1.92613	0.41	0.099	tRG	PAWR
0.001	1.7805	0.94	0.3	tRG	PAX6
0.001	1.77941	0.7	0.174	tRG	PDLIM3
7.77e-16	1.35107	0.47	0.123	tRG	PDPN
0.001	1.18213	0.91	0.336	tRG	PEA15
6.54e-07	0.360113	0.61	0.334	tRG	PEG3
1.11e-16	1.25493	0.55	0.172	tRG	PHGDH
4.22e-13	0.711489	0.74	0.371	tRG	PIK3C2A
5.29e-10	1.178	0.3	0.069	tRG	PLTP
0.001	1.71864	0.43	0.089	tRG	PMP22
1.1e-06	0.496777	0.56	0.293	tRG	PNRC2
0.001	1.10853	0.89	0.269	tRG	PON2
0.001	1.44192	0.62	0.161	tRG	PPAP2B
0.001	0.363527	1	0.946	tRG	PPP1CB
5.48e-09	0.537749	0.93	0.704	tRG	PPP1R12A
0.001	0.891706	0.88	0.501	tRG	PSAP
0.001	1.76905	0.84	0.224	tRG	PSAT1
0.001	1.1424	0.78	0.285	tRG	PTGFRN
0.001	1.16917	0.95	0.377	tRG	PTN
0.001	0.831214	0.97	0.608	tRG	PTPRZ1
0.001	0.383746	0.98	0.715	tRG	QKI
1.65e-10	0.672195	0.59	0.275	tRG	REEP3
0.001	1.20671	0.85	0.31	tRG	RFTN2
0.001	1.4901	0.59	0.144	tRG	RFX4
2.22e-16	0.601906	0.92	0.539	tRG	RHOA
4.45e-05	0.311658	0.7	0.475	tRG	RHOB
4.79e-11	1.42423	0.35	0.093	tRG	RHOC
0.00896367	0.362678	0.34	0.193	tRG	RSU1
0.001	2.41406	0.75	0.132	tRG	SAMD4A
0.001	0.788599	0.95	0.547	tRG	SCD
1.25e-08	0.851232	0.53	0.248	tRG	SCP2
0.001	1.39652	0.81	0.317	tRG	SCRN1
9.65e-14	1.196	0.35	0.079	tRG	SDC2
1.17e-09	0.626387	0.56	0.247	tRG	SDHD
1.47e-09	0.633435	0.91	0.66	tRG	2022-09-02
0.000651045	0.311565	0.58	0.374	tRG	SERP1
0.00021919	0.754178	0.26	0.102	tRG	SERPINH1
2.6e-05	0.528775	0.56	0.32	tRG	SESN3
2.01e-09	1.41509	0.37	0.113	tRG	SFXN5
0.001	1.60854	0.96	0.298	tRG	SLC1A3
0.000211884	0.412557	0.53	0.324	tRG	SMIM7
1.11e-16	0.853508	0.76	0.346	tRG	SNCAIP
0.001	0.715291	0.84	0.348	tRG	SOX2
0.001	1.58544	0.95	0.374	tRG	SOX9
7.01e-14	0.503369	0.94	0.69	tRG	SPAG9
0.001	0.772293	0.9	0.226	tRG	SPARC
2.14e-10	0.92874	0.72	0.387	tRG	SQLE
9.41e-12	0.341759	0.9	0.603	tRG	SRSF5
1.55e-15	0.654722	0.87	0.508	tRG	STAG2
1.07e-05	0.530954	0.33	0.132	tRG	STK17A
0.001	1.22917	0.54	0.143	tRG	STON2
0.001	0.985541	0.96	0.569	tRG	SYT11
2.44e-15	0.701299	0.66	0.261	tRG	TAF13
0.001	2.25968	0.73	0.12	tRG	TAGLN2
5.46e-05	0.314652	0.37	0.176	tRG	TCF7L2
1.67e-15	1.51782	0.35	0.062	tRG	THBS3
3.03e-06	1.29791	0.37	0.153	tRG	TIMM10B
0.000953373	0.365452	0.44	0.254	tRG	TIMM13
3.2e-05	0.680469	0.43	0.211	tRG	TLE1
1.78e-15	0.61473	0.96	0.681	tRG	TMBIM6
1.19e-05	0.441089	0.63	0.383	tRG	TMCO1
5.11e-07	0.573168	0.59	0.316	tRG	TMED10
0.001	1.51917	0.62	0.158	tRG	TMEM47
0.001	0.514955	0.94	0.634	tRG	TOB1
6.97e-13	1.28416	0.6	0.261	tRG	TPM1
2.69e-14	0.593291	0.98	0.756	tRG	TRIM2
0.001	1.39449	0.82	0.27	tRG	TRIM9
0.001	0.987481	0.62	0.206	tRG	TRPS1
4.28e-13	0.576274	0.79	0.42	tRG	TSPAN3
0.001	1.2695	0.59	0.2	tRG	TSPAN6
0.001	1.18502	0.56	0.153	tRG	TTYH1
8.26e-06	0.466805	0.39	0.184	tRG	UBL3
0.001	1.5025	0.94	0.291	tRG	VIM
4.11e-15	1.51362	0.51	0.151	tRG	WWC1
3.55e-15	1.14905	0.44	0.106	tRG	YAP1
0.001	1.74713	0.51	0.133	tRG	YBX3
0.001	0.516245	0.86	0.44	tRG	ZBTB20
0.001	1.00306	0.94	0.378	tRG	ZFHX4
0.001	1.68074	0.94	0.253	tRG	ZFP36L1
7.36e-13	1.05492	0.54	0.193	tRG	ZFP36L2
1.12e-05	0.515274	0.36	0.158	tRG	ZHX2
1.11e-15	0.994262	0.39	0.079	tRG	ZIC5

## Sheet: E. Cluster_score (tRG)
Ferret_tRG_score	score	ID	Age	Subtype.combined		Human_tRG_score	score	ID	Age
E25_AAACCTGCAAGACACG-1	-228.859	F_IPC3	10XE25	F_earlyRG		Hi_GW21_5.Hi_GW21_5	951.139	tRG	19
E25_AAACCTGCAGTTAACC-1	-229.867	F_lateRG2	10XE25	F_earlyRG		Hi_GW21_8.Hi_GW21_8	737.968	RG-div1	19
E25_AAACCTGCATGACATC-1	-310.001	F_lateRG2	10XE25	F_earlyRG		Hi_GW16_11.Hi_GW16_11	-284.629	vRG	14
E25_AAACCTGGTACTTGAC-1	-249.912	F_lateRG2	10XE25	F_earlyRG		Hi_GW16_3.Hi_GW16_3	211.441	RG-div2	14
E25_AAACCTGGTATTCTCT-1	-226.292	F_IPC2	10XE25	F_earlyRG		Hi_GW16_4.Hi_GW16_4	738.946	RG-div2	14
E25_AAACCTGGTCGCGGTT-1	-210.013	F_IPC2	10XE25	F_earlyRG		Hi_GW16_13.Hi_GW16_13	960.21	vRG	14
E25_AAACCTGGTGCAACGA-1	-197.252	F_IPC3	10XE25	F_earlyRG		Hi_GW16_14.Hi_GW16_14	-641.801	IPC-div2	14
E25_AAACCTGGTTATGTGC-1	-335.337	F_earlyRG3	10XE25	F_IPC		Hi_GW16_15.Hi_GW16_15	315.859	RG-div2	14
E25_AAACGGGAGATATGCA-1	-239.677	F_IPC2	10XE25	F_earlyRG		Hi_GW16_16.Hi_GW16_16	1043.36	oRG	14
E25_AAACGGGCAAAGGAAG-1	-192.123	F_IPC2	10XE25	F_earlyRG		Hi_GW16_17.Hi_GW16_17	1169.79	tRG	14
E25_AAACGGGGTACGCTGC-1	-249.543	F_IPC2	10XE25	F_earlyRG		Hi_GW16_18.Hi_GW16_18	1211.25	RG-div2	14
E25_AAACGGGGTTGGTTTG-1	-211.369	F_IPC2	10XE25	F_earlyRG		Hi_GW16_20.Hi_GW16_20	956.378	tRG	14
E25_AAACGGGTCCACGAAT-1	-268.577	F_lateRG2	10XE25	F_earlyRG		Hi_GW16_25.Hi_GW16_25	969.746	tRG	14
E25_AAACGGGTCTCGTTTA-1	-386.779	F_earlyRG2	10XE25	F_IPC		Hi_GW16_24.Hi_GW16_24	-1275.78	IPC-nEN1	14
E25_AAAGATGAGCGCTCCA-1	-233.716	F_lateRG2	10XE25	F_earlyRG		O1.A1	1440.21	tRG	18.5
E25_AAAGATGAGCGGATCA-1	-293.092	F_lateRG2	10XE25	F_earlyRG		O1.B1	-1090.53	IPC-nEN1	18.5
E25_AAAGATGAGGCTCATT-1	-244.522	F_IPC3	10XE25	F_earlyRG		O1.C1	-1131.45	IPC-div2	18.5
E25_AAAGATGCAATGGACG-1	-230.01	F_lateRG2	10XE25	F_earlyRG		O1.D1	-250.564	IPC-div1	18.5
E25_AAAGATGCACTGCCAG-1	-196.739	F_IPC3	10XE25	F_earlyRG		O1.E1	1630.19	tRG	18.5
E25_AAAGCAAAGAGGTAGA-1	-236.834	F_lateRG2	10XE25	F_earlyRG		O1.G1	-1045.68	OPC	18.5
E25_AAAGCAACACGAAATA-1	-183.931	F_IPC2	10XE25	F_earlyRG		O1.H1	-1150.41	tRG	18.5
E25_AAAGCAACATTAGGCT-1	-227.946	F_IPC3	10XE25	F_earlyRG		O1.A2	-925.136	IPC-div2	18.5
E25_AAAGCAATCCACTGGG-1	-251.502	F_lateRG2	10XE25	F_earlyRG		O1.F2	1360.64	tRG	18.5
E25_AAAGTAGAGAGTAAGG-1	-327.718	F_lateRG2	10XE25	F_earlyRG		O1.B4	-847.611	IPC-div2	18.5
E25_AAAGTAGAGTGAAGTT-1	-275.994	F_lateRG2	10XE25	F_earlyRG		O1.E4	-94.9626	IPC-div1	18.5
E25_AAAGTAGCAACACGCC-1	-164.851	F_lateRG2	10XE25	F_earlyRG		O1.F4	-1174.57	IPC-nEN3	18.5
E25_AAAGTAGCACGGTTTA-1	-290.613	F_lateRG2	10XE25	F_earlyRG		O1.G4	962.807	RG-div1	18.5
E25_AAAGTAGCAGTCAGAG-1	-232.065	F_lateRG2	10XE25	F_earlyRG		O1.C5	-988.941	IPC-div1	18.5
E25_AAAGTAGCATGCGCAC-1	-230.554	F_IPC2	10XE25	F_earlyRG		O1.G5	-739.476	IPC-nEN3	18.5
E25_AAATGCCAGATAGGAG-1	-267.141	F_IPC3	10XE25	F_earlyRG		O1.B6	-972.519	IPC-nEN1	18.5
E25_AAATGCCAGCATCATC-1	-214.024	F_IPC2	10XE25	F_earlyRG		O1.E6	1328.88	oRG	18.5
E25_AAATGCCAGGCTAGGT-1	-239.702	F_IPC2	10XE25	F_earlyRG		O1.G7	1557.31	tRG	18.5
E25_AAATGCCCAGGACGTA-1	-271.695	F_lateRG2	10XE25	F_earlyRG		O1.H9	1235.26	tRG	18.5
E25_AAATGCCCAGTCCTTC-1	-220.484	F_IPC2	10XE25	F_earlyRG		O1.B10	-1028.13	IPC-nEN1	18.5
E25_AAATGCCGTCAATACC-1	-253.366	F_earlyRG3	10XE25	F_IPC		O1.H10	1432.76	tRG	18.5
E25_AAATGCCTCCTGCCAT-1	-215.005	F_IPC3	10XE25	F_earlyRG		O1.C11	-835.196	IPC-div2	18.5
E25_AACACGTAGGAGTAGA-1	-226.488	F_IPC3	10XE25	F_earlyRG		O1.D11	260.911	IPC-div2	18.5
E25_AACACGTCACTTCGAA-1	-209.992	F_IPC2	10XE25	F_earlyRG		O1.G11	-1188.89	IPC-nEN1	18.5
E25_AACACGTCAGCGTCCA-1	-210.334	F_IPC3	10XE25	F_earlyRG		O1.A12	-319.066	IPC-nEN1	18.5
E25_AACACGTGTTGATTCG-1	-254.828	F_lateRG2	10XE25	F_earlyRG		O1.G12	-731.548	OPC	18.5
E25_AACACGTTCAGCAACT-1	-305.249	F_IPC2	10XE25	F_earlyRG		O1.H12	-792.811	IPC-nEN3	18.5
E25_AACCATGAGCTTATCG-1	-256.794	F_lateRG2	10XE25	F_earlyRG		O2.A1	1954.21	tRG	18.5
E25_AACCATGCACACCGAC-1	-294.6	F_lateRG2	10XE25	F_earlyRG		O2.B1	-780.137	tRG	18.5
E25_AACCATGCACCCATGG-1	-223.059	F_lateRG2	10XE25	F_earlyRG		O2.F1	1059.76	tRG	18.5
E25_AACCATGCAGGGTACA-1	-209.414	F_lateRG2	10XE25	F_earlyRG		O2.G1	-1291.9	RG-div2	18.5
E25_AACCGCGCACGACTCG-1	-236.23	F_IPC2	10XE25	F_earlyRG		O2.A3	153.304	IPC-nEN3	18.5
E25_AACCGCGGTAAGAGGA-1	-258.185	F_lateRG2	10XE25	F_earlyRG		O2.F3	12.746	IPC-div2	18.5
E25_AACCGCGGTATTCTCT-1	-258.765	F_IPC2	10XE25	F_earlyRG		O2.A4	-333.725	IPC-nEN3	18.5
E25_AACCGCGTCATGTCTT-1	-202.124	F_lateRG2	10XE25	F_earlyRG		O2.F4	0.826434	IPC-div2	18.5
E25_AACCGCGTCTTGTACT-1	-244.106	F_lateRG2	10XE25	F_earlyRG		O2.H4	-197.654	IPC-div1	18.5
E25_AACGTTGCAAGCTGGA-1	-225.547	F_IPC2	10XE25	F_earlyRG		O2.E5	-784.383	IPC-nEN1	18.5
E25_AACGTTGCACTACAGT-1	-143.087	F_IPC3	10XE25	F_earlyRG		O2.C6	391.296	IPC-nEN3	18.5
E25_AACGTTGCATTTGCCC-1	-189.593	F_lateRG2	10XE25	F_earlyRG		O2.H7	672.503	RG-div2	18.5
E25_AACGTTGGTAACGTTC-1	-248.82	F_lateRG2	10XE25	F_earlyRG		O2.C8	-1243.23	IPC-nEN1	18.5
E25_AACGTTGTCACTCTTA-1	-291.483	F_lateRG2	10XE25	F_earlyRG		O2.D8	-864.266	vRG	18.5
E25_AACTCAGCAGCGATCC-1	-177.474	F_IPC2	10XE25	F_earlyRG		O2.F8	1055.9	RG-div2	18.5
E25_AACTCAGGTGCAGTAG-1	-243.214	F_lateRG2	10XE25	F_earlyRG		O2.F9	-770.602	IPC-nEN3	18.5
E25_AACTCCCAGCCTATGT-1	-239.49	F_IPC3	10XE25	F_earlyRG		O2.G9	1522.12	tRG	18.5
E25_AACTCCCGTCCTAGCG-1	-223.564	F_lateRG2	10XE25	F_earlyRG		O2.A10	-936.915	IPC-nEN1	18.5
E25_AACTCCCGTCGCGGTT-1	-236.621	F_lateRG2	10XE25	F_earlyRG		O2.B10	1882.32	tRG	18.5
E25_AACTCCCGTTCTGGTA-1	-234.724	F_lateRG2	10XE25	F_earlyRG		O2.A11	-417.726	IPC-div2	18.5
E25_AACTCTTAGGCGTACA-1	-217.051	F_lateRG2	10XE25	F_earlyRG		O2.D11	-534.764	IPC-nEN1	18.5
E25_AACTCTTCAAGCGATG-1	-231.305	F_lateRG2	10XE25	F_earlyRG		O2.E11	975.122	tRG	18.5
E25_AACTCTTGTGGGTATG-1	-167.939	F_lateRG2	10XE25	F_earlyRG		O2.G11	904.178	RG-div2	18.5
E25_AACTCTTGTTACGACT-1	-115.706	F_IPC2	10XE25	F_earlyRG		O4.A1	-1265.13	RG-div2	14
E25_AACTGGTAGACTAAGT-1	-227.548	F_lateRG2	10XE25	F_earlyRG		O4.E1	-1252.48	vRG	14
E25_AACTGGTAGGGAAACA-1	-289.893	F_lateRG2	10XE25	F_earlyRG		O4.G1	-1038.06	IPC-nEN2	14
E25_AACTGGTAGGGTTTCT-1	-194.49	F_lateRG2	10XE25	F_earlyRG		O4.H1	-1230.18	IPC-nEN1	14
E25_AACTGGTCACATTCGA-1	-278.339	F_lateRG2	10XE25	F_earlyRG		O4.A2	-115.278	RG-div2	14
E25_AACTGGTGTCACAAGG-1	-233.917	F_lateRG2	10XE25	F_earlyRG		O4.C2	-300.154	IPC-div2	14
E25_AACTGGTTCACCCGAG-1	-261.219	F_IPC2	10XE25	F_earlyRG		O4.G2	-273.286	IPC-div2	14
E25_AACTGGTTCCACGTTC-1	-209.832	F_lateRG2	10XE25	F_earlyRG		O4.H2	-381.509	IPC-div2	14
E25_AACTGGTTCCATGAAC-1	-325.517	F_lateRG2	10XE25	F_earlyRG		O4.A4	-368.509	IPC-div2	14
E25_AACTGGTTCGGAGCAA-1	-212.432	F_lateRG2	10XE25	F_earlyRG		O4.C4	-1253.09	IPC-nEN2	14
E25_AACTGGTTCTTGTATC-1	-173.166	F_IPC2	10XE25	F_earlyRG		O4.E4	812.758	RG-div2	14
E25_AACTTTCAGCCACGTC-1	-177.605	F_IPC3	10XE25	F_earlyRG		O4.F4	-722.061	OPC	14
E25_AACTTTCGTACCGGCT-1	-223.557	F_IPC2	10XE25	F_earlyRG		O4.G5	946.219	RG-div2	14
E25_AAGACCTCAGCCTATA-1	-199.933	F_lateRG2	10XE25	F_earlyRG		O4.B6	-1061.91	IPC-nEN1	14
E25_AAGACCTCAGGACCCT-1	-283.598	F_lateRG2	10XE25	F_earlyRG		O4.A7	-1096.09	IPC-nEN1	14
E25_AAGACCTGTCGCGTGT-1	-245.953	F_lateRG2	10XE25	F_earlyRG		O4.E7	295.26	oRG	14
E25_AAGACCTGTTTGTTGG-1	-208.415	F_IPC2	10XE25	F_earlyRG		O4.H7	-355.329	IPC-div2	14
E25_AAGACCTTCAGCCTAA-1	-191.924	F_lateRG2	10XE25	F_earlyRG		O4.A8	-1172.66	IPC-nEN1	14
E25_AAGACCTTCGAACTGT-1	-288.783	F_lateRG2	10XE25	F_earlyRG		O4.B8	-1037.52	IPC-div1	14
E25_AAGCCGCCAGCGTTCG-1	-267.952	F_lateRG2	10XE25	F_earlyRG		O4.C8	-1049.63	IPC-nEN3	14
E25_AAGCCGCTCCAGGGCT-1	-194.965	F_IPC2	10XE25	F_earlyRG		O4.G8	56.7925	RG-div2	14
E25_AAGGAGCAGACCCACC-1	-258.054	F_earlyRG3	10XE25	F_IPC		O4.H8	275.08	RG-div2	14
E25_AAGGAGCAGCGTAATA-1	-129.032	F_IPC3	10XE25	F_earlyRG		O4.G9	111.185	RG-div2	14
E25_AAGGAGCCACCGAATT-1	-181.287	F_IPC2	10XE25	F_earlyRG		O4.H9	403.865	RG-div2	14
E25_AAGGAGCCACCTCGTT-1	-214.092	F_IPC3	10XE25	F_earlyRG		O4.E10	-559.86	vRG	14
E25_AAGGAGCCAGATCCAT-1	-271.683	F_lateRG2	10XE25	F_earlyRG		O4.F10	53.6073	RG-div1	14
E25_AAGGAGCCAGCTCGAC-1	-224.94	F_IPC2	10XE25	F_earlyRG		O4.C11	-636.49	IPC-div2	14
E25_AAGGCAGAGCTGCCCA-1	-262.531	F_lateRG2	10XE25	F_earlyRG		O4.A12	1280.69	RG-div2	14
E25_AAGGCAGAGGAATGGA-1	-235.559	F_lateRG2	10XE25	F_earlyRG		O4.F12	1085.1	oRG	14
E25_AAGGCAGAGTAGGCCA-1	-217.534	F_IPC2	10XE25	F_earlyRG		O4.H12	-1056.57	IPC-nEN1	14
E25_AAGGCAGAGTGTACCT-1	-221.464	F_IPC3	10XE25	F_earlyRG		O7.B1	1611.23	tRG	14.7
E25_AAGGCAGCAAACGCGA-1	-187.322	F_lateRG2	10XE25	F_earlyRG		O7.C1	-767.272	IPC-nEN1	14.7
E25_AAGGCAGCAGATAATG-1	-261.582	F_lateRG2	10XE25	F_earlyRG		O7.D1	1542.8	tRG	14.7
E25_AAGGCAGCAGGGCATA-1	-165.976	F_IPC2	10XE25	F_earlyRG		O7.F1	-27.4259	IPC-nEN3	14.7
E25_AAGGCAGGTGATGTGG-1	-175.607	F_IPC3	10XE25	F_earlyRG		O7.C2	1095.77	RG-div1	14.7
E25_AAGGCAGTCTTATCTG-1	-209.012	F_lateRG2	10XE25	F_earlyRG		O7.D2	1172.96	oRG	14.7
E25_AAGGTTCAGCGATATA-1	-224.982	F_lateRG2	10XE25	F_earlyRG		O7.A3	-784.898	IPC-nEN1	14.7
E25_AAGGTTCAGTACGTTC-1	-300.846	F_lateRG2	10XE25	F_earlyRG		O7.C3	874.827	RG-div1	14.7
E25_AAGGTTCGTACATCCA-1	-178.569	F_lateRG2	10XE25	F_earlyRG		O7.D3	-1091.18	IPC-nEN1	14.7
E25_AAGGTTCTCAATCTCT-1	-159.353	F_lateRG2	10XE25	F_earlyRG		O7.F3	-1006.98	IPC-nEN1	14.7
E25_AAGTCTGAGCCACCTG-1	-207.658	F_IPC2	10XE25	F_earlyRG		O7.H3	888.745	oRG	14.7
E25_AAGTCTGCAATCCGAT-1	-216.277	F_lateRG2	10XE25	F_earlyRG		O7.D4	-966.855	IPC-nEN3	14.7
E25_AAGTCTGCAGTGAGTG-1	-224.177	F_IPC2	10XE25	F_earlyRG		O7.F4	1937.35	tRG	14.7
E25_AAGTCTGGTAAACACA-1	-272.422	F_IPC2	10XE25	F_earlyRG		O7.H4	1129.71	RG-div1	14.7
E25_AAGTCTGTCGTCCGTT-1	-209.948	F_lateRG2	10XE25	F_earlyRG		O7.A5	666.882	RG-div1	14.7
E25_AAGTCTGTCGTCTGAA-1	-341.615	F_lateRG2	10XE25	F_earlyRG		O7.E5	1607.86	tRG	14.7
E25_AATCCAGAGCGCCTCA-1	-205.757	F_lateRG2	10XE25	F_earlyRG		O7.C6	1497.91	tRG	14.7
E25_AATCCAGAGGTTCCTA-1	-229.517	F_lateRG2	10XE25	F_earlyRG		O7.E6	-550.769	IPC-div2	14.7
E25_AATCCAGAGTACGATA-1	-270.347	F_lateRG2	10XE25	F_earlyRG		O7.A7	1387.12	RG-div1	14.7
E25_AATCCAGAGTACGCCC-1	-199.407	F_lateRG2	10XE25	F_earlyRG		O7.F7	-1095.71	IPC-nEN1	14.7
E25_AATCCAGCAACTGGCC-1	-176.678	F_IPC2	10XE25	F_earlyRG		O7.A8	104.271	IPC-nEN3	14.7
E25_AATCCAGCATATACGC-1	-204.872	F_lateRG2	10XE25	F_earlyRG		O7.B8	1363.47	RG-div1	14.7
E25_AATCCAGGTGTGTGCC-1	-233.16	F_lateRG2	10XE25	F_earlyRG		O7.H8	780.846	RG-div1	14.7
E25_AATCCAGGTTAAGACA-1	-273.916	F_IPC2	10XE25	F_earlyRG		O7.A9	-800.672	IPC-nEN3	14.7
E25_AATCCAGGTTTAAGCC-1	-235.005	F_lateRG2	10XE25	F_earlyRG		O7.B9	1627.13	tRG	14.7
E25_AATCGGTAGCCAGTAG-1	-253.287	F_IPC2	10XE25	F_earlyRG		O7.G9	785.176	RG-div1	14.7
E25_AATCGGTAGGGAGTAA-1	-167.37	F_IPC2	10XE25	F_earlyRG		O7.F10	983.035	RG-div1	14.7
E25_AATCGGTGTAAGTGGC-1	-231.005	F_lateRG2	10XE25	F_earlyRG		O7.C11	-967.726	IPC-nEN1	14.7
E25_AATCGGTGTCCAACTA-1	-291.314	F_lateRG2	10XE25	F_earlyRG		O7.D11	1609.64	tRG	14.7
E25_AATCGGTGTGACAAAT-1	-236.39	F_lateRG2	10XE25	F_earlyRG		O7.F11	566.746	tRG	14.7
E25_AATCGGTTCAAGGCTT-1	-234.887	F_IPC2	10XE25	F_earlyRG		O7.B12	1345.49	RG-div1	14.7
E25_AATCGGTTCTACCTGC-1	-250.357	F_lateRG2	10XE25	F_earlyRG		O7.D12	1592.75	tRG	14.7
E25_ACACCAAAGTCGATAA-1	-217.424	F_lateRG2	10XE25	F_earlyRG		O7.G12	1547.23	RG-div1	14.7
E25_ACACCAAAGTGCCAGA-1	-235.679	F_IPC3	10XE25	F_earlyRG		O8.B1	-689.724	IPC-div2	14.7
E25_ACACCAAAGTGGCACA-1	-352.36	F_earlyRG3	10XE25	F_IPC		O8.H1	-1425.57	IPC-div2	14.7
E25_ACACCAACACACCGCA-1	-216.857	F_lateRG2	10XE25	F_earlyRG		O8.C2	99.4217	vRG	14.7
E25_ACACCAACAGTCAGAG-1	-169.873	F_IPC3	10XE25	F_earlyRG		O8.F2	309.115	RG-div2	14.7
E25_ACACCCTAGGCCCTCA-1	-178.02	F_IPC3	10XE25	F_earlyRG		O8.H2	1172.98	oRG	14.7
E25_ACACCCTCAAGCTGGA-1	-248.857	F_IPC2	10XE25	F_earlyRG		O8.E3	650.648	RG-div2	14.7
E25_ACACCCTCAATGCCAT-1	-220.591	F_IPC3	10XE25	F_earlyRG		O8.A5	-961.71	IPC-div1	14.7
E25_ACACCCTGTAGCTAAA-1	-198.853	F_IPC3	10XE25	F_earlyRG		O8.F6	829.53	RG-div2	14.7
E25_ACACCGGCACCTCGTT-1	-235.05	F_IPC3	10XE25	F_earlyRG		O8.D7	611.322	RG-div2	14.7
E25_ACACCGGCAGAAGCAC-1	-264.948	F_IPC3	10XE25	F_earlyRG		O8.E7	760.035	RG-div2	14.7
E25_ACACCGGTCAGTGTTG-1	-237.489	F_lateRG2	10XE25	F_earlyRG		O8.F8	1654.7	tRG	14.7
E25_ACACCGGTCGCAAACT-1	-237.916	F_IPC3	10XE25	F_earlyRG		O8.A9	898.977	RG-div2	14.7
E25_ACACTGAAGACAAGCC-1	-227.275	F_lateRG2	10XE25	F_earlyRG		O8.H11	-112.535	IPC-div2	14.7
E25_ACACTGAAGATGGGTC-1	-315.256	F_IPC3	10XE25	F_earlyRG		O9.D1	-1309.35	IPC-nEN3	14.7
E25_ACACTGAAGCACCGTC-1	-211.329	F_IPC2	10XE25	F_earlyRG		O9.F1	-551.126	IPC-div1	14.7
E25_ACACTGACAGCTCGCA-1	-196.139	F_IPC2	10XE25	F_earlyRG		O9.D2	1092.67	tRG	14.7
E25_ACACTGACAGTCGTGC-1	-183.702	F_IPC3	10XE25	F_earlyRG		O9.E2	968.438	oRG	14.7
E25_ACACTGAGTCAGCTAT-1	-236.545	F_lateRG2	10XE25	F_earlyRG		O9.A3	-431.846	IPC-div1	14.7
E25_ACACTGAGTGTTCTTT-1	-191.556	F_lateRG2	10XE25	F_earlyRG		O9.C4	-688.852	IPC-nEN1	14.7
E25_ACACTGATCAGTGCAT-1	-158.298	F_lateRG2	10XE25	F_earlyRG		O9.E4	-609.09	IPC-nEN1	14.7
E25_ACAGCCGCATACAGCT-1	-216.991	F_lateRG2	10XE25	F_earlyRG		O9.F4	1239.73	tRG	14.7
E25_ACAGCCGTCATTATCC-1	-160.516	F_lateRG2	10XE25	F_earlyRG		O9.A5	312.254	RG-div2	14.7
E25_ACAGCCGTCTCGCTTG-1	-161.692	F_lateRG2	10XE25	F_earlyRG		O9.B5	1891.44	tRG	14.7
E25_ACAGCTAAGCGATCCC-1	-215.744	F_IPC2	10XE25	F_earlyRG		O9.F5	1196.93	tRG	14.7
E25_ACAGCTAAGTAACCCT-1	-318.648	F_lateRG2	10XE25	F_earlyRG		O9.H5	-705.85	IPC-div1	14.7
E25_ACAGCTAAGTTGAGAT-1	-249.882	F_IPC2	10XE25	F_earlyRG		O9.A6	1889.43	tRG	14.7
E25_ACAGCTACAAACAACA-1	-307.217	F_earlyRG3	10XE25	F_IPC		O9.D7	929.208	RG-div1	14.7
E25_ACAGCTAGTCTGCAAT-1	-241.462	F_IPC2	10XE25	F_earlyRG		O9.B8	803.791	oRG	14.7
E25_ACAGCTATCATAAAGG-1	-173.965	F_IPC2	10XE25	F_earlyRG		O9.D8	679.297	RG-div1	14.7
E25_ACATACGCAATGTAAG-1	-327.167	F_lateRG2	10XE25	F_earlyRG		O9.G9	1478.65	tRG	14.7
E25_ACATACGGTGACTACT-1	-212.444	F_IPC2	10XE25	F_earlyRG		O9.A12	100.115	IPC-div2	14.7
E25_ACATCAGAGCGTCTAT-1	-265.466	F_lateRG2	10XE25	F_earlyRG		O9.D12	-534.865	IPC-nEN3	14.7
E25_ACATCAGAGGTGGGTT-1	-226.662	F_IPC2	10XE25	F_earlyRG		O9.H12	1675.7	RG-div1	14.7
E25_ACATCAGCAGCATACT-1	-218.585	F_lateRG2	10XE25	F_earlyRG		O10.A1	424.38	RG-div2	14.7
E25_ACATCAGGTTGTGGCC-1	-209.757	F_lateRG2	10XE25	F_earlyRG		O10.E1	-809.685	IPC-nEN3	14.7
E25_ACATGGTCAGACGCAA-1	-244.524	F_lateRG2	10XE25	F_earlyRG		O10.F1	-1253.17	IPC-nEN2	14.7
E25_ACATGGTCAGGAACGT-1	-245.526	F_IPC2	10XE25	F_earlyRG		O10.G1	-1242.76	IPC-nEN2	14.7
E25_ACATGGTCAGTTTACG-1	-375.045	F_earlyRG3	10XE25	F_IPC		O10.H1	-1257.59	IPC-nEN1	14.7
E25_ACATGGTGTGGACGAT-1	-266.54	F_lateRG2	10XE25	F_earlyRG		O10.D3	425.454	vRG	14.7
E25_ACCAGTAAGATACACA-1	-197.538	F_IPC2	10XE25	F_earlyRG		O10.G3	718.509	vRG	14.7
E25_ACCAGTAAGGGTTCCC-1	-185.165	F_IPC2	10XE25	F_earlyRG		O10.A4	320.303	vRG	14.7
E25_ACCAGTACATACCATG-1	-200.531	F_lateRG2	10XE25	F_earlyRG		O10.C4	507.133	RG-div2	14.7
E25_ACCAGTAGTAAGCACG-1	-207.453	F_lateRG2	10XE25	F_earlyRG		O10.F6	1442.27	tRG	14.7
E25_ACCAGTAGTCTAGCGC-1	-253.612	F_lateRG2	10XE25	F_earlyRG		O10.A8	-1296.83	IPC-nEN2	14.7
E25_ACCAGTATCGAATCCA-1	-220.986	F_lateRG2	10XE25	F_earlyRG		O10.E8	-1461.39	IPC-nEN2	14.7
E25_ACCAGTATCTGCAGTA-1	-378.792	F_lateRG2	10XE25	F_earlyRG		O10.F11	-1392.8	IPC-nEN2	14.7
E25_ACCCACTCACCCATGG-1	-133.257	F_IPC3	10XE25	F_earlyRG		O10.A12	491.635	RG-div1	14.7
E25_ACCCACTCAGTTAACC-1	-297.16	F_lateRG2	10XE25	F_earlyRG		O12.A1	661.702	RG-div2	14
E25_ACCCACTTCCTTGGTC-1	-159.996	F_IPC2	10XE25	F_earlyRG		O12.B1	133.222	RG-div2	14
E25_ACCCACTTCTTGAGGT-1	-249.578	F_lateRG2	10XE25	F_earlyRG		O12.C1	-105.897	RG-div1	14
E25_ACCCACTTCTTGCATT-1	-263.498	F_lateRG2	10XE25	F_earlyRG		O12.D1	-416.474	OPC	14
E25_ACCGTAAAGCAGATCG-1	-159.968	F_IPC2	10XE25	F_earlyRG		O12.E1	-993.849	RG-div2	14
E25_ACCGTAATCTACTCAT-1	-163.824	F_IPC3	10XE25	F_earlyRG		O12.H1	460.752	RG-div1	14
E25_ACCTTTAGTCTGCAAT-1	-206.834	F_IPC2	10XE25	F_earlyRG		O12.A2	-1203.78	IPC-nEN1	14
E25_ACCTTTATCCTTTACA-1	-181.065	F_lateRG2	10XE25	F_earlyRG		O12.F2	1454.44	oRG	14
E25_ACCTTTATCGGAAACG-1	-258.921	F_IPC2	10XE25	F_earlyRG		O12.G2	1002.75	RG-div2	14
E25_ACGAGCCCAACAACCT-1	-261.931	F_IPC2	10XE25	F_earlyRG		O12.H2	1003.6	RG-div2	14
E25_ACGAGCCCACGGACAA-1	-298.087	F_lateRG2	10XE25	F_earlyRG		O12.A3	1056.18	oRG	14
E25_ACGAGCCCAGCTGTAT-1	-335.174	F_lateRG2	10XE25	F_earlyRG		O12.A8	453.543	Astrocyte	22
E25_ACGAGCCGTACGAAAT-1	-191.087	F_lateRG2	10XE25	F_earlyRG		O12.B8	983.605	tRG	22
E25_ACGAGCCTCGCATGGC-1	-265.758	F_lateRG2	10XE25	F_earlyRG		O12.F8	-266.334	IPC-div1	22
E25_ACGATACAGATGTGTA-1	-212.278	F_lateRG2	10XE25	F_earlyRG		O12.G8	-102.532	IPC-nEN3	22
E25_ACGATACCACTATCTT-1	-256.919	F_lateRG2	10XE25	F_earlyRG		O12.A9	567.217	Astrocyte	22
E25_ACGATACCATCTCGCT-1	-245.285	F_IPC2	10XE25	F_earlyRG		O12.A10	2223.09	oRG	22
E25_ACGATACTCCATGAGT-1	-198.032	F_lateRG2	10XE25	F_earlyRG		O12.B10	353.402	tRG	22
E25_ACGATACTCTTTACGT-1	-231.239	F_IPC3	10XE25	F_earlyRG		O12.D10	1720.19	oRG	22
E25_ACGATGTAGCGTAGTG-1	-199.109	F_IPC3	10XE25	F_earlyRG		O12.A12	1264.58	tRG	14.7
E25_ACGATGTAGCTGATAA-1	-185.893	F_IPC3	10XE25	F_earlyRG		O12.B12	-1173.94	IPC-nEN3	14.7
E25_ACGATGTAGGAGTACC-1	-229.283	F_IPC2	10XE25	F_earlyRG		O12.E12	464.743	RG-div2	14.7
E25_ACGATGTAGTGACTCT-1	-258.535	F_IPC2	10XE25	F_earlyRG		S1.F2	832.437	RG-div1	11
E25_ACGATGTGTAGGGACT-1	-179.601	F_IPC2	10XE25	F_earlyRG		S1.B3	564.646	RG-div2	11
E25_ACGCAGCCACAAGTAA-1	-209.15	F_IPC3	10XE25	F_earlyRG		S1.D9	-106.554	RG-div1	11
E25_ACGCAGCGTGTTCGAT-1	-222.9	F_IPC2	10XE25	F_earlyRG		S1.F10	639.654	oRG	11
E25_ACGCAGCTCTCTGTCG-1	-188.636	F_lateRG2	10XE25	F_earlyRG		S1.F11	685.511	RG-div1	11
E25_ACGCCAGAGAAACCTA-1	-280.322	F_IPC2	10XE25	F_earlyRG		S1.G11	-8.49927	vRG	11
E25_ACGCCAGAGCCAGAAC-1	-217.212	F_IPC2	10XE25	F_earlyRG		S2.E1	-1234.91	IPC-div1	11
E25_ACGCCAGAGGGATGGG-1	-237.71	F_IPC2	10XE25	F_earlyRG		S2.G1	-968.521	vRG	11
E25_ACGCCAGAGTCGCCGT-1	-211.151	F_lateRG2	10XE25	F_earlyRG		S2.A2	-1036.71	IPC-nEN1	11
E25_ACGCCAGCACCTATCC-1	-286.221	F_IPC3	10XE25	F_earlyRG		S2.D3	411.105	RG-div2	11
E25_ACGCCAGCATATACCG-1	-193.412	F_lateRG2	10XE25	F_earlyRG		S2.E3	430.634	RG-div1	11
E25_ACGCCAGTCGGATGTT-1	-239.591	F_lateRG2	10XE25	F_earlyRG		S2.D4	178.288	RG-div2	11
E25_ACGCCGAAGCTCCCAG-1	-323.412	F_lateRG2	10XE25	F_earlyRG		S2.H4	-69.1015	RG-div2	11
E25_ACGCCGACAGGAACGT-1	-240.881	F_lateRG2	10XE25	F_earlyRG		S2.C5	-79.7577	RG-div2	11
E25_ACGCCGATCGGATGGA-1	-233.372	F_lateRG2	10XE25	F_earlyRG		S2.E6	-697.473	IPC-div2	11
E25_ACGGAGAAGATGGGTC-1	-187.618	F_IPC2	10XE25	F_earlyRG		S2.G6	24.386	RG-div2	11
E25_ACGGAGAAGCAATATG-1	-249.214	F_lateRG2	10XE25	F_earlyRG		S2.A7	162.101	vRG	11
E25_ACGGAGAGTCCGACGT-1	-219.198	F_lateRG2	10XE25	F_earlyRG		S2.C7	256.519	RG-div1	11
E25_ACGGCCAAGAGTAAGG-1	-166.6	F_IPC2	10XE25	F_earlyRG		S2.A8	113.475	RG-div2	11
E25_ACGGCCAGTAGCTCCG-1	-253.707	F_lateRG2	10XE25	F_earlyRG		S2.E9	61.4806	RG-div1	11
E25_ACGGGCTTCACCGGGT-1	-184.045	F_IPC3	10XE25	F_earlyRG		S2.G9	-822.12	IPC-div2	11
E25_ACGGGTCCATGCTGGC-1	-298.87	F_lateRG2	10XE25	F_earlyRG		S2.A10	83.7883	RG-div2	11
E25_ACGGGTCGTTAGTGGG-1	-230.995	F_IPC2	10XE25	F_earlyRG		S2.E10	-892.536	IPC-div1	11
E25_ACGGGTCTCAGTGCAT-1	-243.473	F_IPC3	10XE25	F_earlyRG		S2.H10	181.619	RG-div1	11
E25_ACGTCAAAGAGTTGGC-1	-196.478	F_IPC2	10XE25	F_earlyRG		S2.G11	609.898	vRG	11
E25_ACGTCAACACGAAGCA-1	-160.129	F_IPC2	10XE25	F_earlyRG		S2.H12	-1318.54	IPC-nEN2	14.5
E25_ACGTCAATCAGAAATG-1	-179.023	F_lateRG2	10XE25	F_earlyRG		S3.A1	-1078.59	RG-div1	14.5
E25_ACGTCAATCTTGTATC-1	-167.684	F_lateRG2	10XE25	F_earlyRG		S3.B1	341.644	RG-div1	14.5
E25_ACTGAACAGTGCCAGA-1	-234.548	F_IPC2	10XE25	F_earlyRG		S3.C1	-136.833	vRG	14.5
E25_ACTGAACCACTCAGGC-1	-312.654	F_IPC3	10XE25	F_earlyRG		S3.D1	-1244.08	IPC-nEN2	14.5
E25_ACTGAACTCGCAAGCC-1	-258.886	F_IPC3	10XE25	F_earlyRG		S3.E1	281.199	vRG	14.5
E25_ACTGAGTAGATGTTAG-1	-211.669	F_lateRG2	10XE25	F_earlyRG		S3.F1	-1248.66	IPC-nEN1	14.5
E25_ACTGAGTAGCCTATGT-1	-208.361	F_IPC2	10XE25	F_earlyRG		S3.G1	-734.321	IPC-nEN3	14.5
E25_ACTGAGTAGGGCTCTC-1	-232.597	F_lateRG2	10XE25	F_earlyRG		S3.A2	-1187.67	IPC-nEN2	14.5
E25_ACTGAGTAGTCCTCCT-1	-178.971	F_IPC3	10XE25	F_earlyRG		S3.C2	589.249	tRG	14.5
E25_ACTGAGTCAATTGCTG-1	-193.319	F_IPC2	10XE25	F_earlyRG		S3.E2	-983.889	IPC-nEN2	14.5
E25_ACTGAGTCACATCCGG-1	-268.074	F_tRG	10XE25	F_lateRG		S3.F2	-1319.1	IPC-nEN2	14.5
E25_ACTGAGTCACCTCGTT-1	-219.317	F_lateRG2	10XE25	F_earlyRG		S3.G2	-1239.15	IPC-nEN1	14.5
E25_ACTGAGTCAGATGAGC-1	-164.184	F_lateRG2	10XE25	F_earlyRG		S3.D3	656.542	RG-div2	14.5
E25_ACTGAGTGTGTGGCTC-1	-232.173	F_lateRG2	10XE25	F_earlyRG		S3.E3	-999.311	IPC-nEN1	14.5
E25_ACTGAGTGTTCGTTGA-1	-215.015	F_lateRG2	10XE25	F_earlyRG		S3.F3	531.722	RG-div1	14.5
E25_ACTGATGCAAGAGTCG-1	-231.631	F_lateRG2	10XE25	F_earlyRG		S3.G3	1075.31	tRG	14.5
E25_ACTGATGCATCGGACC-1	-267.148	F_IPC2	10XE25	F_earlyRG		S3.H3	757.235	tRG	14.5
E25_ACTGATGCATTGAGCT-1	-207.819	F_lateRG2	10XE25	F_earlyRG		S3.B4	934.756	RG-div1	14.5
E25_ACTGATGGTTTGCATG-1	-164.739	F_IPC3	10XE25	F_earlyRG		S3.C4	709.276	vRG	14.5
E25_ACTGATGTCTCGGACG-1	-239.397	F_lateRG2	10XE25	F_earlyRG		S3.F4	188.506	vRG	14.5
E25_ACTGATGTCTCTTGAT-1	-188.303	F_IPC3	10XE25	F_earlyRG		S3.H4	-1395.57	IPC-nEN2	14.5
E25_ACTGCTCCAAGCGCTC-1	-293.511	F_lateRG2	10XE25	F_earlyRG		S3.A5	-1420.42	IPC-nEN2	14.5
E25_ACTGCTCCAGGTCTCG-1	-248.617	F_IPC3	10XE25	F_earlyRG		S3.D5	748.504	vRG	14.5
E25_ACTGCTCTCCAATGGT-1	-260.387	F_lateRG2	10XE25	F_earlyRG		S3.E5	583.773	vRG	14.5
E25_ACTGCTCTCTGCAGTA-1	-199.623	F_IPC2	10XE25	F_earlyRG		S3.F5	495.102	RG-div1	14.5
E25_ACTGTCCAGTACTTGC-1	-218.534	F_lateRG2	10XE25	F_earlyRG		S3.G5	-1272	IPC-nEN2	14.5
E25_ACTGTCCAGTCCCACG-1	-227.025	F_lateRG2	10XE25	F_earlyRG		S3.H5	334.323	RG-div1	14.5
E25_ACTGTCCCAGATCGGA-1	-257.626	F_IPC2	10XE25	F_earlyRG		S3.A6	-1162.86	IPC-nEN2	14.5
E25_ACTGTCCCAGCCACCA-1	-245.142	F_IPC2	10XE25	F_earlyRG		S3.B6	1156.03	tRG	14.5
E25_ACTGTCCGTCAGATAA-1	-247.578	F_IPC3	10XE25	F_earlyRG		S3.C6	294.511	RG-div2	14.5
E25_ACTGTCCTCAGTGTTG-1	-198.558	F_IPC2	10XE25	F_earlyRG		S3.E6	-1208.44	IPC-nEN2	14.5
E25_ACTTACTAGACTTTCG-1	-183.467	F_lateRG2	10XE25	F_earlyRG		S3.G6	-1212.52	IPC-nEN2	14.5
E25_ACTTACTAGAGTAAGG-1	-275.799	F_lateRG2	10XE25	F_earlyRG		S3.H6	659.202	RG-div1	14.5
E25_ACTTACTCAATCGGTT-1	-259.519	F_lateRG2	10XE25	F_earlyRG		S3.D7	733.047	vRG	14.5
E25_ACTTACTCAGGTGCCT-1	-208.338	F_IPC2	10XE25	F_earlyRG		S3.E7	288.794	vRG	14.5
E25_ACTTACTGTCACCTAA-1	-320.136	F_lateRG2	10XE25	F_earlyRG		S3.G7	-867.098	IPC-div1	14.5
E25_ACTTACTTCAACGCTA-1	-199.347	F_lateRG2	10XE25	F_earlyRG		S3.H7	-1395.25	IPC-nEN2	14.5
E25_ACTTGTTCAGATCTGT-1	-241.419	F_lateRG2	10XE25	F_earlyRG		S3.A8	-1304.02	IPC-nEN2	14.5
E25_ACTTGTTGTACAGACG-1	-256.116	F_lateRG2	10XE25	F_earlyRG		S3.B8	-1293.15	IPC-nEN2	14.5
E25_ACTTGTTTCACAGTAC-1	-193.924	F_lateRG2	10XE25	F_earlyRG		S3.C8	727.408	RG-div1	14.5
E25_ACTTGTTTCAGTGTTG-1	-240.732	F_lateRG2	10XE25	F_earlyRG		S3.D8	621.609	tRG	14.5
E25_ACTTGTTTCCTGTAGA-1	-143.389	F_lateRG2	10XE25	F_earlyRG		S3.E8	499.148	vRG	14.5
E25_ACTTTCAAGCTTTGGT-1	-234.029	F_lateRG2	10XE25	F_earlyRG		S3.A9	-1099.34	IPC-nEN2	14.5
E25_ACTTTCAAGGACAGCT-1	-241.438	F_lateRG2	10XE25	F_earlyRG		S3.D9	-1477.69	IPC-nEN2	14.5
E25_ACTTTCACACGACTCG-1	-242.993	F_lateRG2	10XE25	F_earlyRG		S3.E9	1024.56	RG-div1	14.5
E25_ACTTTCACAGACGCAA-1	-223.362	F_IPC3	10XE25	F_earlyRG		S3.F9	-1338.41	IPC-nEN2	14.5
E25_ACTTTCACATGCCTAA-1	-259.994	F_IPC2	10XE25	F_earlyRG		S3.H9	-1000.89	IPC-div2	14.5
E25_ACTTTCAGTAGAAAGG-1	-221.104	F_lateRG2	10XE25	F_earlyRG		S3.A10	516.86	RG-div1	14.5
E25_ACTTTCAGTCGTTGTA-1	-186.137	F_IPC2	10XE25	F_earlyRG		S3.B10	425.017	RG-div1	14.5
E25_ACTTTCAGTCTGGAGA-1	-274.883	F_lateRG2	10XE25	F_earlyRG		S3.C10	669.188	vRG	14.5
E25_AGAATAGAGGACCACA-1	-180.673	F_IPC2	10XE25	F_earlyRG		S15.H2	-861.764	OPC	13
E25_AGAATAGAGTGGAGTC-1	-218.818	F_IPC3	10XE25	F_earlyRG		S16.C1	-967.237	IPC-nEN2	13
E25_AGAATAGCATTTGCCC-1	-272.561	F_lateRG2	10XE25	F_earlyRG		S16.H1	1537.69	oRG	13
E25_AGAATAGTCGTGGACC-1	-209.842	F_lateRG2	10XE25	F_earlyRG		S16.F2	774.26	RG-div1	13
E25_AGACGTTCACGACTCG-1	-273.631	F_IPC2	10XE25	F_earlyRG		S16.E3	117.515	vRG	13
E25_AGACGTTGTACATCCA-1	-315.105	F_lateRG2	10XE25	F_earlyRG		S16.A4	1189.07	oRG	13
E25_AGACGTTGTCATCCCT-1	-297.633	F_IPC3	10XE25	F_earlyRG		S16.D4	-1288.32	IPC-nEN2	13
E25_AGACGTTGTCTCTCGT-1	-239.633	F_IPC2	10XE25	F_earlyRG		S16.F4	995.765	tRG	13
E25_AGACGTTGTCTTGATG-1	-212.365	F_IPC2	10XE25	F_earlyRG		S16.B5	683.1	RG-div1	13
E25_AGACGTTGTGTCGCTG-1	-162.1	F_lateRG2	10XE25	F_earlyRG		S16.E5	1199.22	tRG	13
E25_AGAGCGAAGCGTCTAT-1	-289.564	F_lateRG2	10XE25	F_earlyRG		S16.C6	1370.05	tRG	13
E25_AGAGCGAAGTGAACGC-1	-230.874	F_lateRG2	10XE25	F_earlyRG		S16.D6	1537.82	vRG	13
E25_AGAGCGACACTTAACG-1	-405.538	F_IPC3	10XE25	F_earlyRG		S16.E6	1523.4	tRG	13
E25_AGAGCGATCTTAACCT-1	-194.932	F_IPC2	10XE25	F_earlyRG		S16.F6	1191.55	tRG	13
E25_AGAGCTTCAACTGCGC-1	-324.177	F_IPC3	10XE25	F_earlyRG		S16.C7	1082.64	tRG	13
E25_AGAGCTTCATCGATTG-1	-230.615	F_IPC3	10XE25	F_earlyRG		S16.B8	977.946	RG-div1	13
E25_AGAGCTTGTAACGCGA-1	-286.777	F_lateRG2	10XE25	F_earlyRG		S16.D8	812.127	vRG	13
E25_AGAGCTTGTGGTCTCG-1	-245.293	F_lateRG2	10XE25	F_earlyRG		S16.E8	265.418	vRG	13
E25_AGAGCTTGTGTGCCTG-1	-190.383	F_IPC3	10XE25	F_earlyRG		S16.G8	1366.62	tRG	13
E25_AGAGCTTTCACCCTCA-1	-185.164	F_IPC2	10XE25	F_earlyRG		S16.C10	-1199.24	IPC-nEN2	13
E25_AGAGCTTTCAGCTGGC-1	-252.528	F_IPC2	10XE25	F_earlyRG		S16.D11	-1263.57	IPC-nEN2	13
E25_AGAGTGGAGATGGCGT-1	-312.948	F_lateRG2	10XE25	F_earlyRG		S17.A1	-959.774	IPC-nEN3	13
E25_AGAGTGGAGCAATCTC-1	-233.176	F_IPC2	10XE25	F_earlyRG		S17.G10	883.893	oRG	19
E25_AGAGTGGCATCGGGTC-1	-345.126	F_lateRG2	10XE25	F_earlyRG		S19.B1	459.871	vRG	19
E25_AGAGTGGCATGCCACG-1	-161.225	F_lateRG2	10XE25	F_earlyRG		S19.C4	-1132.28	IPC-nEN1	14.2
E25_AGAGTGGGTACAGTTC-1	-259.575	F_lateRG2	10XE25	F_earlyRG		S19.G4	1663.62	tRG	14.2
E25_AGAGTGGGTCTAGGTT-1	-347.7	F_IPC1	10XE25	F_IPC		S19.A6	-552.705	IPC-nEN3	14.2
E25_AGAGTGGTCACCGGGT-1	-169.572	F_lateRG2	10XE25	F_earlyRG		S19.B7	1811.81	tRG	14.2
E25_AGATCTGAGCACCGTC-1	-311.943	F_lateRG2	10XE25	F_earlyRG		S19.E7	745.151	RG-div1	14.2
E25_AGATCTGCAAAGTCAA-1	-152.565	F_IPC3	10XE25	F_earlyRG		S19.G8	-1358.23	IPC-nEN2	14.2
E25_AGATCTGGTAGGCTGA-1	-252.381	F_lateRG2	10XE25	F_earlyRG		S19.E9	677.868	RG-div1	14.2
E25_AGATCTGGTCGAAAGC-1	-244.52	F_lateRG2	10XE25	F_earlyRG		S19.C10	898.107	tRG	14.2
E25_AGATCTGGTTGGAGGT-1	-219.558	F_lateRG2	10XE25	F_earlyRG		S19.D11	975.521	tRG	14.2
E25_AGATCTGGTTTGACAC-1	-364.99	F_IPC1	10XE25	F_IPC		S20.C1	-1466.57	IPC-div2	14.2
E25_AGATCTGTCCGCTGTT-1	-222.193	F_lateRG2	10XE25	F_earlyRG		S20.H1	-1410.26	IPC-nEN2	14.2
E25_AGATCTGTCGTGGGAA-1	-279.509	F_earlyRG3	10XE25	F_IPC		S20.A9	-1208.37	IPC-nEN2	14.2
E25_AGATTGCAGCAACGGT-1	-189.583	F_IPC2	10XE25	F_earlyRG		S20.G9	-1444.81	IPC-nEN2	14.2
E25_AGATTGCAGCGCCTCA-1	-326.816	F_IPC1	10XE25	F_IPC		S20.G10	934.64	vRG	14.2
E25_AGATTGCCATGAAGTA-1	-184.074	F_IPC3	10XE25	F_earlyRG		S20.H10	-1439.68	IPC-nEN2	14.2
E25_AGATTGCGTAACGACG-1	-193.146	F_lateRG2	10XE25	F_earlyRG		S20.G11	-172.764	RG-div2	14.2
E25_AGATTGCTCTTTCCTC-1	-231.864	F_lateRG2	10XE25	F_earlyRG		S20.A12	-1439.25	IPC-nEN2	14.2
E25_AGCAGCCAGCAACGGT-1	-174.164	F_IPC2	10XE25	F_earlyRG		S20.C12	-810.991	IPC-div2	14.2
E25_AGCAGCCAGTATCTCG-1	-213.636	F_IPC2	10XE25	F_earlyRG		S21.A1	-1302.78	tRG	14.2
E25_AGCAGCCAGTGCAAGC-1	-231.936	F_IPC2	10XE25	F_earlyRG		S21.F1	-1480.42	IPC-nEN2	14.2
E25_AGCAGCCAGTGGTAGC-1	-134.837	F_lateRG2	10XE25	F_earlyRG		S21.G2	468.825	oRG	14.2
E25_AGCAGCCCAAATACAG-1	-177.545	F_IPC3	10XE25	F_earlyRG		S21.E3	1054.06	vRG	14.2
E25_AGCAGCCCAATGGTCT-1	-228.132	F_IPC2	10XE25	F_earlyRG		S21.H3	-1197.51	IPC-nEN2	14.2
E25_AGCATACAGCCATCGC-1	-274.191	F_lateRG2	10XE25	F_earlyRG		S21.A5	-473.996	IPC-nEN3	14.2
E25_AGCATACCACCTCGTT-1	-148.259	F_IPC2	10XE25	F_earlyRG		S21.E5	1898.55	tRG	14.2
E25_AGCATACCAGCTTCGG-1	-205.059	F_lateRG2	10XE25	F_earlyRG		S21.B6	-1287.37	IPC-nEN2	14.2
E25_AGCATACCATATGAGA-1	-117.327	F_lateRG2	10XE25	F_earlyRG		S21.D6	544.449	oRG	14.2
E25_AGCATACGTACTTCTT-1	-238.446	F_IPC2	10XE25	F_earlyRG		S21.F6	445.066	vRG	14.2
E25_AGCATACTCTACTCAT-1	-220.767	F_lateRG2	10XE25	F_earlyRG		S21.G6	1214.23	tRG	14.2
E25_AGCATACTCTTCTGGC-1	-261.948	F_lateRG2	10XE25	F_earlyRG		S21.D7	-1397.29	IPC-nEN2	14.2
E25_AGCCTAAAGAACTGTA-1	-198.904	F_IPC3	10XE25	F_earlyRG		S21.F8	-1357.92	IPC-nEN2	14.2
E25_AGCCTAACACGAGGTA-1	-227.452	F_lateRG2	10XE25	F_earlyRG		S21.A9	-1285.76	IPC-nEN2	14.2
E25_AGCCTAACAGGAATCG-1	-226.544	F_lateRG2	10XE25	F_earlyRG		S21.A10	2232.09	tRG	14.2
E25_AGCCTAACATAACCTG-1	-200.383	F_lateRG2	10XE25	F_earlyRG		S21.B10	-1287.05	IPC-nEN2	14.2
E25_AGCCTAAGTACCGTAT-1	-287.186	F_lateRG2	10XE25	F_earlyRG		S22.B7	730.799	RG-div2	13.3
E25_AGCCTAAGTATATGAG-1	-183.787	F_lateRG2	10XE25	F_earlyRG		S22.G7	-319.029	RG-div2	13.3
E25_AGCCTAATCTTGCAAG-1	-209.469	F_IPC2	10XE25	F_earlyRG		S22.C9	-37.2164	vRG	13.3
E25_AGCGGTCAGTCGTTTG-1	-303.432	F_earlyRG3	10XE25	F_IPC		S22.F11	-291.193	OPC	19
E25_AGCGGTCGTCCAAGTT-1	-168.495	F_lateRG2	10XE25	F_earlyRG		S23.B1	-1404.51	vRG	13.3
E25_AGCGGTCGTTTGGCGC-1	-261.685	F_IPC3	10XE25	F_earlyRG		S23.D1	650.435	RG-div2	13.3
E25_AGCGTATAGCTTTGGT-1	-215.009	F_IPC3	10XE25	F_earlyRG		S23.F1	233.09	RG-div2	13.3
E25_AGCGTATCAGCGTCCA-1	-210.838	F_IPC3	10XE25	F_earlyRG		S23.C2	311.117	RG-div1	13.3
E25_AGCGTATGTGCAACGA-1	-297.66	F_lateRG2	10XE25	F_earlyRG		S23.E2	-78.4806	vRG	13.3
E25_AGCGTATGTGCCTTGG-1	-221.785	F_IPC3	10XE25	F_earlyRG		S23.B4	65.7265	RG-div2	13.3
E25_AGCGTATGTTTGACTG-1	-224.575	F_lateRG2	10XE25	F_earlyRG		S23.D4	634.728	RG-div1	13.3
E25_AGCGTATTCACTCCTG-1	-404.157	F_IPC3	10XE25	F_earlyRG		S23.E4	412.275	RG-div2	13.3
E25_AGCGTATTCGCATGGC-1	-221.172	F_IPC3	10XE25	F_earlyRG		S23.H4	344.083	RG-div2	13.3
E25_AGCGTCGAGACGCAAC-1	-241.096	F_lateRG2	10XE25	F_earlyRG		S23.A5	420.439	RG-div2	13.3
E25_AGCGTCGCAAAGCAAT-1	-268.579	F_IPC3	10XE25	F_earlyRG		S23.B5	-759.919	IPC-div2	13.3
E25_AGCGTCGCACTAAGTC-1	-209.3	F_lateRG2	10XE25	F_earlyRG		S23.F5	489.558	RG-div1	13.3
E25_AGCGTCGGTCCTAGCG-1	-228.801	F_lateRG2	10XE25	F_earlyRG		S23.B6	78.3603	RG-div1	13.3
E25_AGCGTCGTCTTGCAAG-1	-340.757	F_lateRG2	10XE25	F_earlyRG		S23.C7	466.856	RG-div2	13.3
E25_AGCTCCTAGGCGATAC-1	-239.001	F_lateRG2	10XE25	F_earlyRG		S23.F7	449.484	tRG	13.3
E25_AGCTCCTGTCACAAGG-1	-198.88	F_IPC2	10XE25	F_earlyRG		S23.C9	-1292.04	IPC-nEN2	13.3
E25_AGCTCCTTCTTGTACT-1	-256.507	F_IPC2	10XE25	F_earlyRG		S23.E9	78.4192	RG-div2	13.3
E25_AGCTCTCAGAAACCTA-1	-109.292	F_lateRG2	10XE25	F_earlyRG		S23.F9	491.442	RG-div2	13.3
E25_AGCTCTCAGAAGGGTA-1	-243.006	F_lateRG2	10XE25	F_earlyRG		S23.B11	201.701	vRG	13.3
E25_AGCTCTCAGGCCCTCA-1	-181.915	F_IPC2	10XE25	F_earlyRG		S23.A12	-656.26	RG-early	13.3
E25_AGCTCTCCAGTCACTA-1	-157.791	F_lateRG2	10XE25	F_earlyRG		S23.D12	-101.344	vRG	13.3
E25_AGCTCTCGTGCAGACA-1	-118.71	F_IPC3	10XE25	F_earlyRG		S23.H12	129.395	vRG	13.3
E25_AGCTTGATCTGAGTGT-1	-315.557	F_lateRG2	10XE25	F_earlyRG		S24.D1	-1271.48	RG-div1	13.3
E25_AGGCCACCATACAGCT-1	-328.582	F_earlyRG3	10XE25	F_IPC		S24.E1	-1312.07	vRG	13.3
E25_AGGCCACTCAGGTTCA-1	-173.968	F_lateRG2	10XE25	F_earlyRG		S24.A4	-1300.02	IPC-nEN2	13.3
E25_AGGCCACTCGCCAGCA-1	-205.936	F_IPC3	10XE25	F_earlyRG		S24.F4	-480.959	vRG	13.3
E25_AGGCCGTCATCCGGGT-1	-212.469	F_lateRG2	10XE25	F_earlyRG		S24.A6	987.06	RG-div2	13.3
E25_AGGCCGTTCAAAGTAG-1	-329.357	F_lateRG2	10XE25	F_earlyRG		S24.F6	-427.507	IPC-div2	13.3
E25_AGGGAGTAGATGCGAC-1	-231.173	F_lateRG2	10XE25	F_earlyRG		S24.G7	329.981	RG-div2	13.3
E25_AGGGAGTAGCTAACTC-1	-189.506	F_lateRG2	10XE25	F_earlyRG		S24.C9	1274.1	tRG	13.3
E25_AGGGAGTAGGTGGGTT-1	-202.164	F_IPC2	10XE25	F_earlyRG		S24.D9	-884.42	IPC-nEN3	13.3
E25_AGGGAGTCAACTGCTA-1	-227.466	F_lateRG2	10XE25	F_earlyRG		S24.A10	656.962	oRG	13.3
E25_AGGGAGTGTCGACTAT-1	-207.991	F_IPC2	10XE25	F_earlyRG		S24.B11	508.111	vRG	13.3
E25_AGGGAGTTCATCATTC-1	-196.996	F_IPC3	10XE25	F_earlyRG		S24.D11	766.174	RG-div1	13.3
E25_AGGGATGAGAAACGCC-1	-159.761	F_IPC2	10XE25	F_earlyRG		S24.E12	-197.291	vRG	13.3
E25_AGGGATGAGACTACAA-1	-326.662	F_IPC1	10XE25	F_IPC		S25.A3	626.565	RG-div1	13.3
E25_AGGGATGGTATTACCG-1	-179.133	F_IPC3	10XE25	F_earlyRG		S25.B9	442.999	RG-div1	13.3
E25_AGGGATGGTTTAAGCC-1	-202.946	F_IPC2	10XE25	F_earlyRG		S26.F1	-1433.33	OPC	17.3
E25_AGGGTGAAGGACACCA-1	-161.023	F_IPC2	10XE25	F_earlyRG		S26.H2	394.737	RG-div1	17.3
E25_AGGGTGAAGTGACATA-1	-242.871	F_lateRG2	10XE25	F_earlyRG		S26.B3	-302.375	IPC-nEN1	17.3
E25_AGGGTGAGTACTCAAC-1	-186.783	F_lateRG2	10XE25	F_earlyRG		S26.C4	1401.29	oRG	17.3
E25_AGGGTGAGTTCGTGAT-1	-195.485	F_IPC2	10XE25	F_earlyRG		S26.G8	1504.8	tRG	17.3
E25_AGGGTGAGTTGCCTCT-1	-185.88	F_IPC3	10XE25	F_earlyRG		S26.F11	-904.488	OPC	17.3
E25_AGGGTGATCTCAAGTG-1	-207.019	F_lateRG2	10XE25	F_earlyRG		S27.C1	84.016	RG-div2	17.3
E25_AGGTCATAGACACGAC-1	-211.545	F_IPC2	10XE25	F_earlyRG		S27.F1	-1148.93	IPC-div2	17.3
E25_AGGTCATAGGTAAACT-1	-347.114	F_lateRG2	10XE25	F_earlyRG		S27.B3	-544.52	IPC-div1	17.3
E25_AGGTCATCATATACCG-1	-219.155	F_IPC2	10XE25	F_earlyRG		S27.H3	1067.96	oRG	17.3
E25_AGGTCATGTACCGGCT-1	-212.882	F_IPC2	10XE25	F_earlyRG		S27.G4	-904.533	IPC-nEN1	17.3
E25_AGGTCATGTCACTTCC-1	-266.145	F_lateRG2	10XE25	F_earlyRG		S27.H5	536.926	oRG	17.3
E25_AGGTCATGTTGGGACA-1	-344.194	F_lateRG2	10XE25	F_earlyRG		S27.H7	771.802	vRG	17.3
E25_AGGTCATTCAAACCAC-1	-138.273	F_lateRG2	10XE25	F_earlyRG		S27.F10	-561.055	IPC-div2	17.3
E25_AGGTCATTCACATACG-1	-133.384	F_IPC3	10XE25	F_earlyRG		S27.D11	-810.001	IPC-div2	17.3
E25_AGGTCATTCAGTTGAC-1	-243.443	F_IPC2	10XE25	F_earlyRG		S27.H11	470.637	RG-div2	17.3
E25_AGGTCCGAGCGTGAGT-1	-210.511	F_lateRG2	10XE25	F_earlyRG		S27.H12	960.733	oRG	17.3
E25_AGGTCCGAGTGGTCCC-1	-249.365	F_lateRG2	10XE25	F_earlyRG		S28.G1	1414.66	oRG	14.2
E25_AGGTCCGCAAGCCTAT-1	-250.717	F_lateRG2	10XE25	F_earlyRG		S28.B2	972.292	vRG	14.2
E25_AGGTCCGTCTTGTATC-1	-192.092	F_IPC2	10XE25	F_earlyRG		S28.D4	1988.6	oRG	14.2
E25_AGTAGTCAGCACACAG-1	-207.189	F_lateRG2	10XE25	F_earlyRG		S28.G5	2152.22	oRG	14.2
E25_AGTAGTCAGGAATCGC-1	-155.381	F_lateRG2	10XE25	F_earlyRG		S28.E6	-711.525	Astrocyte	14.2
E25_AGTAGTCAGGATGTAT-1	-233.31	F_lateRG2	10XE25	F_earlyRG		S31.G5	-579.7	Astrocyte	32
E25_AGTAGTCAGGTGCACA-1	-255.448	F_lateRG2	10XE25	F_earlyRG		S31.B6	-718.544	Astrocyte	32
E25_AGTAGTCAGTCCCACG-1	-189.561	F_IPC2	10XE25	F_earlyRG		S31.E9	-727.968	Astrocyte	32
E25_AGTAGTCCACTCGACG-1	-132.663	F_lateRG2	10XE25	F_earlyRG		S31.G9	-170.235	RG-div1	32
E25_AGTAGTCTCCTCAATT-1	-217.827	F_IPC3	10XE25	F_earlyRG		S31.G10	-11.2706	Astrocyte	32
E25_AGTCTTTAGAACAATC-1	-182.072	F_IPC2	10XE25	F_earlyRG		S31.G12	-88.7076	Astrocyte	32
E25_AGTCTTTAGTCCGTAT-1	-139.285	F_IPC2	10XE25	F_earlyRG		S32.H2	300.04	Astrocyte	32
E25_AGTCTTTGTAACGCGA-1	-272.345	F_lateRG2	10XE25	F_earlyRG		S32.D3	-941.592	Astrocyte	32
E25_AGTCTTTGTCGTGGCT-1	-246.965	F_lateRG2	10XE25	F_earlyRG		S32.E4	-266.632	Astrocyte	32
E25_AGTCTTTGTCTTTCAT-1	-255.393	F_lateRG2	10XE25	F_earlyRG		S32.E6	-606.026	Astrocyte	32
E25_AGTGAGGAGCCAGGAT-1	-210.98	F_lateRG2	10XE25	F_earlyRG		S32.H6	193.347	Astrocyte	32
E25_AGTGAGGAGCTAAACA-1	-294.743	F_lateRG2	10XE25	F_earlyRG		S32.E7	524.215	Astrocyte	32
E25_AGTGAGGCACATCCGG-1	-203.13	F_IPC2	10XE25	F_earlyRG		S32.B8	9.40598	Astrocyte	32
E25_AGTGAGGCAGACAAGC-1	-198.347	F_IPC2	10XE25	F_earlyRG		S32.E8	-575.979	OPC	32
E25_AGTGAGGCAGATTGCT-1	-206.243	F_IPC2	10XE25	F_earlyRG		S32.G9	-1111.91	OPC	32
E25_AGTGAGGCATTCTTAC-1	-207.451	F_lateRG2	10XE25	F_earlyRG		S32.H9	165.84	Astrocyte	32
E25_AGTGAGGGTCGACTAT-1	-249.932	F_IPC2	10XE25	F_earlyRG		S32.B10	-1065.32	Astrocyte	32
E25_AGTGAGGTCACATAGC-1	-190.333	F_lateRG2	10XE25	F_earlyRG		S32.C11	-529.012	Astrocyte	32
E25_AGTGAGGTCGGTTAAC-1	-206.933	F_lateRG2	10XE25	F_earlyRG		S32.F12	-335.212	OPC	32
E25_AGTGAGGTCTGATACG-1	-193.617	F_IPC3	10XE25	F_earlyRG		S32.H12	-470.928	OPC	32
E25_AGTGGGAAGACCTAGG-1	-178.284	F_lateRG2	10XE25	F_earlyRG		S33.F5	-885.275	OPC	32
E25_AGTGGGAGTCGAAAGC-1	-132.601	F_IPC2	10XE25	F_earlyRG		S33.G5	-496.231	OPC	32
E25_AGTGGGAGTGAGGCTA-1	-262.456	F_lateRG2	10XE25	F_earlyRG		S33.B6	235.612	Astrocyte	32
E25_AGTGGGATCTGGAGCC-1	-188.783	F_lateRG2	10XE25	F_earlyRG		S33.G6	28.9859	Astrocyte	32
E25_AGTGTCAAGCGCTTAT-1	-218.001	F_IPC3	10XE25	F_earlyRG		S33.G7	-231.821	Astrocyte	32
E25_AGTGTCAAGTGACTCT-1	-229.293	F_IPC3	10XE25	F_earlyRG		S33.F8	-611.004	OPC	32
E25_AGTGTCACAGCCAGAA-1	-183.056	F_IPC3	10XE25	F_earlyRG		S33.C12	-469.881	Astrocyte	32
E25_AGTGTCACAGGACCCT-1	-287.398	F_lateRG2	10XE25	F_earlyRG		S35.A4	641.332	RG-div1	15
E25_AGTGTCAGTACGAAAT-1	-236.782	F_IPC2	10XE25	F_earlyRG		S35.B4	1116.33	RG-div1	15
E25_AGTGTCATCCGTCATC-1	-199.085	F_IPC2	10XE25	F_earlyRG		S35.D4	1513.7	RG-div1	15
E25_AGTTGGTAGGCGCTCT-1	-223.814	F_IPC3	10XE25	F_earlyRG		S35.E5	-887.855	IPC-div1	15
E25_AGTTGGTCATTGCGGC-1	-241.715	F_lateRG2	10XE25	F_earlyRG		S35.F5	1101	RG-div1	15
E25_AGTTGGTGTCGCATAT-1	-232.12	F_IPC2	10XE25	F_earlyRG		S35.A7	-849.02	IPC-nEN1	15
E25_ATAGACCAGACAGAGA-1	-198.174	F_lateRG2	10XE25	F_earlyRG		S35.E7	-1075.09	IPC-div1	15
E25_ATAGACCCAAACTGTC-1	-226.618	F_IPC3	10XE25	F_earlyRG		S35.F7	441.533	IPC-div1	15
E25_ATAGACCCAAAGTGCG-1	-252.857	F_lateRG2	10XE25	F_earlyRG		S35.C8	1237.5	RG-div1	15
E25_ATAGACCCACGCATCG-1	-194.831	F_IPC3	10XE25	F_earlyRG		S35.F8	1326.11	RG-div1	15
E25_ATAGACCCACTGTCGG-1	-151.597	F_IPC2	10XE25	F_earlyRG		S35.H8	1238.93	RG-div1	15
E25_ATAGACCCAGGGTATG-1	-257.279	F_lateRG2	10XE25	F_earlyRG		S35.A9	187.504	IPC-div1	15
E25_ATAGACCGTAAATACG-1	-315.375	F_lateRG2	10XE25	F_earlyRG		S35.B9	1647.28	RG-div1	15
E25_ATAGACCTCACGGTTA-1	-158.147	F_IPC2	10XE25	F_earlyRG		S36.C1	-760.593	RG-div1	16.3
E25_ATCACGACAACTGGCC-1	-240.106	F_lateRG2	10XE25	F_earlyRG		S36.F1	-342.652	tRG	16.3
E25_ATCACGACACATCCAA-1	-308.321	F_lateRG2	10XE25	F_earlyRG		S36.G6	-516.564	OPC	16.3
E25_ATCACGACAGGGAGAG-1	-216.558	F_IPC3	10XE25	F_earlyRG		S36.A8	-1243.53	IPC-nEN2	16.3
E25_ATCACGAGTAGAAGGA-1	-196.597	F_lateRG2	10XE25	F_earlyRG		S36.H8	1215.16	RG-div2	16.3
E25_ATCACGAGTAGTAGTA-1	-174.316	F_IPC2	10XE25	F_earlyRG		S36.A9	-137.031	IPC-div2	16.3
E25_ATCACGAGTATTACCG-1	-237.27	F_IPC2	10XE25	F_earlyRG		S36.C9	360.432	RG-div2	16.3
E25_ATCACGAGTCAATACC-1	-214.407	F_lateRG2	10XE25	F_earlyRG		S36.F9	708.87	vRG	16.3
E25_ATCACGAGTGCGAAAC-1	-285.435	F_lateRG2	10XE25	F_earlyRG		S36.H9	-108.904	RG-div2	16.3
E25_ATCACGAGTTTAGGAA-1	-204.976	F_lateRG2	10XE25	F_earlyRG		S36.A10	1597.05	RG-div1	16.3
E25_ATCACGAGTTTGTTGG-1	-207.698	F_IPC2	10XE25	F_earlyRG		S36.B10	1791.74	tRG	16.3
E25_ATCACGATCACCGGGT-1	-197.618	F_lateRG2	10XE25	F_earlyRG		S36.C10	-138.097	IPC-div2	16.3
E25_ATCATCTCAATGGTCT-1	-117.339	F_IPC2	10XE25	F_earlyRG		S36.E10	-1105.6	IPC-div1	16.3
E25_ATCATCTCAATGTAAG-1	-272.567	F_IPC3	10XE25	F_earlyRG		S36.A11	927.649	oRG	16.3
E25_ATCATCTCATAACCTG-1	-181.768	F_lateRG2	10XE25	F_earlyRG		S36.B11	1818.95	RG-div2	16.3
E25_ATCATCTGTACCGGCT-1	-174.693	F_IPC2	10XE25	F_earlyRG		S36.D11	750.762	tRG	16.3
E25_ATCATCTTCACAACGT-1	-184.942	F_IPC3	10XE25	F_earlyRG		S36.E11	-588.561	IPC-nEN3	16.3
E25_ATCATCTTCATGCAAC-1	-198.522	F_IPC3	10XE25	F_earlyRG		S36.F11	1144.26	tRG	16.3
E25_ATCATCTTCGGAGGTA-1	-192.831	F_IPC2	10XE25	F_earlyRG		S36.G11	997.974	tRG	16.3
E25_ATCATGGGTACTTCTT-1	-245.621	F_IPC2	10XE25	F_earlyRG		S36.A12	1068.58	vRG	16.3
E25_ATCCACCAGATCTGCT-1	-204.821	F_lateRG2	10XE25	F_earlyRG		S36.B12	1781.18	RG-div1	16.3
E25_ATCCACCAGATTACCC-1	-173.005	F_lateRG2	10XE25	F_earlyRG		S36.C12	1160.69	RG-div1	16.3
E25_ATCCACCCAGGAATCG-1	-197.403	F_lateRG2	10XE25	F_earlyRG		S36.D12	-882	IPC-nEN1	16.3
E25_ATCCACCCATCCGCGA-1	-161.752	F_lateRG2	10XE25	F_earlyRG		S36.G12	-969.826	IPC-div1	16.3
E25_ATCCACCCATGGGACA-1	-178.619	F_IPC3	10XE25	F_earlyRG		S37.C1	-891.634	RG-div2	16.3
E25_ATCCACCGTTCCACTC-1	-237.13	F_IPC3	10XE25	F_earlyRG		S37.E1	-1161.46	IPC-nEN1	16.3
E25_ATCCGAACACAGGCCT-1	-391.784	F_earlyRG3	10XE25	F_IPC		S37.A2	-511.474	IPC-div2	16.3
E25_ATCCGAACACTGCCAG-1	-205.5	F_IPC2	10XE25	F_earlyRG		S37.E2	-983.783	IPC-nEN1	16.3
E25_ATCCGAATCGGTCTAA-1	-276.164	F_lateRG2	10XE25	F_earlyRG		S37.G2	1031.09	RG-div2	16.3
E25_ATCCGAATCTTGTTTG-1	-239.178	F_IPC3	10XE25	F_earlyRG		S37.G3	-1040.78	IPC-div1	16.3
E25_ATCGAGTCATGGTCAT-1	-201.897	F_lateRG2	10XE25	F_earlyRG		S37.G4	213.291	RG-div2	16.3
E25_ATCGAGTGTAGCCTAT-1	-218.263	F_IPC2	10XE25	F_earlyRG		S37.A5	1031.3	oRG	16.3
E25_ATCGAGTGTGTTGAGG-1	-368.618	F_lateRG2	10XE25	F_earlyRG		S37.A6	732.35	RG-div1	16.3
E25_ATCGAGTGTTCCGGCA-1	-269.433	F_lateRG2	10XE25	F_earlyRG		S37.E7	478.421	RG-div2	16.3
E25_ATCGAGTTCAGCACAT-1	-231.458	F_lateRG2	10XE25	F_earlyRG		S37.A8	-66.6873	IPC-div2	16.3
E25_ATCGAGTTCATTCACT-1	-196.764	F_lateRG2	10XE25	F_earlyRG		S37.C8	1152.66	tRG	16.3
E25_ATCGAGTTCCGTAGGC-1	-264.729	F_lateRG2	10XE25	F_earlyRG		S37.E8	1046.57	vRG	16.3
E25_ATCTACTCACAAGACG-1	-146.885	F_IPC2	10XE25	F_earlyRG		S37.B9	-1296.69	IPC-div2	16.3
E25_ATCTACTCAGACGCTC-1	-310.108	F_lateRG2	10XE25	F_earlyRG		S37.B11	913.514	RG-div2	16.3
E25_ATCTACTCAGTTCATG-1	-151.222	F_IPC2	10XE25	F_earlyRG		S37.B12	853.338	RG-div2	16.3
E25_ATCTACTCATCACCCT-1	-219.775	F_lateRG2	10XE25	F_earlyRG		S37.C12	878.318	RG-div2	16.3
E25_ATCTACTTCGCACTCT-1	-183.016	F_lateRG2	10XE25	F_earlyRG		S37.D12	728.422	oRG	16.3
E25_ATCTGCCAGAAACGCC-1	-126.057	F_IPC2	10XE25	F_earlyRG		S38.A1	-907.302	RG-div1	16.3
E25_ATCTGCCCAGTCGATT-1	-181.198	F_IPC2	10XE25	F_earlyRG		S38.C1	-596.298	IPC-nEN1	16.3
E25_ATCTGCCCAGTTTACG-1	-272.448	F_IPC2	10XE25	F_earlyRG		S38.D1	1331.04	vRG	16.3
E25_ATCTGCCGTGTTTGGT-1	-206.843	F_IPC3	10XE25	F_earlyRG		S38.E1	1686.37	vRG	16.3
E25_ATGAGGGAGACGCTTT-1	-346.515	F_lateRG2	10XE25	F_earlyRG		S38.A2	628.117	vRG	16.3
E25_ATGAGGGCAATGGTCT-1	-335.849	F_earlyRG3	10XE25	F_IPC		S38.B2	717.842	RG-div2	16.3
E25_ATGAGGGGTAGGCATG-1	-171.373	F_IPC3	10XE25	F_earlyRG		S38.F2	898.981	vRG	16.3
E25_ATGAGGGGTGACGGTA-1	-280.589	F_lateRG2	10XE25	F_earlyRG		S38.H2	1732	tRG	16.3
E25_ATGCGATCACGGCTAC-1	-190.32	F_IPC2	10XE25	F_earlyRG		S38.C3	1436.03	tRG	16.3
E25_ATGCGATGTCTCTCGT-1	-205.588	F_IPC3	10XE25	F_earlyRG		S38.E3	-916.232	IPC-nEN1	16.3
E25_ATGGGAGCAAAGCAAT-1	-204.087	F_lateRG2	10XE25	F_earlyRG		S38.H3	-429.543	IPC-nEN1	16.3
E25_ATGGGAGCACAGAGGT-1	-217.44	F_IPC3	10XE25	F_earlyRG		S38.C4	-726.377	IPC-nEN1	16.3
E25_ATGGGAGGTGTTTGGT-1	-213.368	F_lateRG2	10XE25	F_earlyRG		S38.D4	-391.515	IPC-nEN3	16.3
E25_ATGTGTGAGAGCCCAA-1	-189.265	F_lateRG2	10XE25	F_earlyRG		S38.E4	1327.31	tRG	16.3
E25_ATGTGTGTCGGCGCTA-1	-241.32	F_lateRG2	10XE25	F_earlyRG		S38.G4	1752.58	tRG	16.3
E25_ATGTGTGTCGGCGGTT-1	-275.635	F_IPC3	10XE25	F_earlyRG		S38.A5	881.948	RG-div2	16.3
E25_ATGTGTGTCGTAGATC-1	-232.726	F_lateRG2	10XE25	F_earlyRG		S38.D5	347.799	vRG	16.3
E25_ATTACTCAGCAGGCTA-1	-303.603	F_lateRG2	10XE25	F_earlyRG		S38.E5	757.041	RG-div1	16.3
E25_ATTACTCAGCGGCTTC-1	-207.682	F_IPC2	10XE25	F_earlyRG		S38.F5	-219.533	IPC-div2	16.3
E25_ATTACTCAGTCCGGTC-1	-128.045	F_IPC2	10XE25	F_earlyRG		S38.G5	1316.65	tRG	16.3
E25_ATTACTCCAGGACCCT-1	-207.522	F_lateRG2	10XE25	F_earlyRG		S38.H5	1347.66	RG-div1	16.3
E25_ATTACTCTCAAACGGG-1	-132.147	F_IPC2	10XE25	F_earlyRG		S38.D6	1690.57	tRG	16.3
E25_ATTACTCTCCAAGTAC-1	-125.365	F_IPC2	10XE25	F_earlyRG		S38.E6	1359.35	RG-div1	16.3
E25_ATTACTCTCGGAAACG-1	-171.672	F_IPC3	10XE25	F_earlyRG		S38.F6	995.88	RG-div2	16.3
E25_ATTATCCAGTGTCCAT-1	-271.761	F_lateRG2	10XE25	F_earlyRG		S38.G6	1587.01	RG-div1	16.3
E25_ATTATCCCAGGAATCG-1	-223.622	F_IPC2	10XE25	F_earlyRG		S38.H6	915.914	tRG	16.3
E25_ATTATCCCATTCCTCG-1	-241.832	F_IPC2	10XE25	F_earlyRG		S38.B7	904.463	RG-div2	16.3
E25_ATTATCCGTATTCTCT-1	-242.041	F_lateRG2	10XE25	F_earlyRG		S38.E7	-200.867	IPC-nEN3	16.3
E25_ATTATCCTCTTGGGTA-1	-254.121	F_IPC3	10XE25	F_earlyRG		S38.B8	1587.68	tRG	16.3
E25_ATTCTACTCGAACTGT-1	-319.956	F_lateRG2	10XE25	F_earlyRG		S38.F8	746.198	RG-div1	16.3
E25_ATTCTACTCGACCAGC-1	-237.24	F_lateRG2	10XE25	F_earlyRG		S38.A9	1895.36	tRG	16.3
E25_ATTGGACAGCGTGAGT-1	-159.675	F_IPC3	10XE25	F_earlyRG		S38.B9	1127.13	RG-div2	16.3
E25_ATTGGACGTCCGAGTC-1	-255.446	F_IPC3	10XE25	F_earlyRG		S38.C9	860.749	RG-div1	16.3
E25_ATTGGACTCAACGGCC-1	-126.413	F_IPC2	10XE25	F_earlyRG		S38.E9	-536.533	IPC-div2	16.3
E25_ATTGGACTCAGCTCGG-1	-253.552	F_lateRG2	10XE25	F_earlyRG		S38.D11	-1019.53	IPC-nEN1	16.3
E25_ATTGGTGAGACTAAGT-1	-257.05	F_IPC3	10XE25	F_earlyRG		S38.A12	1407.07	RG-div1	16.3
E25_ATTGGTGCACATTTCT-1	-228.243	F_lateRG2	10XE25	F_earlyRG		S41.A1	-558.3	vRG	13.3
E25_ATTGGTGCACGTGAGA-1	-214.204	F_lateRG2	10XE25	F_earlyRG		S41.G1	-1335.31	RG-div1	13.3
E25_ATTGGTGGTAGCACGA-1	-171.049	F_IPC2	10XE25	F_earlyRG		S41.A12	280.214	vRG	13.3
E25_ATTTCTGAGATGCGAC-1	-220.249	F_IPC2	10XE25	F_earlyRG		S41.G12	520.928	RG-div1	13.3
E25_ATTTCTGAGTTACGGG-1	-175.814	F_IPC2	10XE25	F_earlyRG		S42.B1	-995.797	IPC-nEN1	13.3
E25_ATTTCTGCACGTGAGA-1	-120.32	F_IPC2	10XE25	F_earlyRG		S42.D1	-984.193	IPC-nEN1	13.3
E25_ATTTCTGCAGTAAGCG-1	-271.34	F_lateRG2	10XE25	F_earlyRG		S42.G1	-1158.68	IPC-nEN1	13.3
E25_ATTTCTGTCACGGTTA-1	-280.149	F_lateRG2	10XE25	F_earlyRG		S42.H1	-176.481	RG-div2	13.3
E25_ATTTCTGTCAGAGACG-1	-170.165	F_IPC2	10XE25	F_earlyRG		S42.B2	-1002.46	IPC-nEN1	13.3
E25_ATTTCTGTCTTACCTA-1	-262.99	F_lateRG2	10XE25	F_earlyRG		S42.F2	463.836	RG-div2	13.3
E25_CAACCAAAGCTGAACG-1	-358.703	F_lateRG2	10XE25	F_earlyRG		S42.A3	-993.965	IPC-div1	13.3
E25_CAACCAACACAGCGTC-1	-326.293	F_earlyRG3	10XE25	F_IPC		S42.F7	307.445	oRG	18.5
E25_CAACCAACACTGCCAG-1	-216.559	F_lateRG2	10XE25	F_earlyRG		S42.C8	-912.688	IPC-div1	18.5
E25_CAACCTCAGAGCTTCT-1	-200.446	F_IPC2	10XE25	F_earlyRG		S42.A9	-553.917	IPC-div2	18.5
E25_CAACCTCCACCGGAAA-1	-263.936	F_lateRG2	10XE25	F_earlyRG		S42.H11	-452.481	IPC-nEN3	18.5
E25_CAACCTCCATGCAACT-1	-254.15	F_lateRG2	10XE25	F_earlyRG		S42.B12	-874.483	IPC-nEN1	18.5
E25_CAACCTCCATGTAGTC-1	-139.475	F_lateRG2	10XE25	F_earlyRG		S42.G12	-1132.19	IPC-nEN1	18.5
E25_CAACCTCGTACTTGAC-1	-154.493	F_lateRG2	10XE25	F_earlyRG		S44.D5	1442.46	oRG	17.5
E25_CAACCTCGTGAACCTT-1	-120.739	F_IPC3	10XE25	F_earlyRG		S44.G7	569.097	RG-div1	17.5
E25_CAACCTCGTGACAAAT-1	-229.402	F_lateRG2	10XE25	F_earlyRG		S44.D8	-949.105	IPC-nEN1	17.5
E25_CAACCTCGTTACCGAT-1	-215.771	F_lateRG2	10XE25	F_earlyRG		S44.D9	-992.737	IPC-nEN1	17.5
E25_CAACTAGAGACGCACA-1	-278.24	F_IPC2	10XE25	F_earlyRG		S44.E10	1225.64	oRG	17.5
E25_CAACTAGGTGGCAAAC-1	-171.12	F_lateRG2	10XE25	F_earlyRG		S45.C1	-1374.45	Astrocyte	21.5
E25_CAACTAGTCGGTTAAC-1	-242.975	F_IPC3	10XE25	F_earlyRG		S45.G1	-999.41	OPC	21.5
E25_CAAGAAAAGAGGTTGC-1	-234.039	F_lateRG2	10XE25	F_earlyRG		S45.G2	400.05	oRG	21.5
E25_CAAGAAAAGCCGATTT-1	-211.226	F_IPC3	10XE25	F_earlyRG		S45.E3	-663.201	Astrocyte	21.5
E25_CAAGAAAAGGCATGGT-1	-241.82	F_IPC2	10XE25	F_earlyRG		S45.G3	-34.5853	Astrocyte	21.5
E25_CAAGAAAAGGGTGTTG-1	-273.507	F_lateRG2	10XE25	F_earlyRG		S45.D4	74.4308	Astrocyte	21.5
E25_CAAGAAACACATGGGA-1	-211.009	F_lateRG2	10XE25	F_earlyRG		S45.A5	-655.945	OPC	21.5
E25_CAAGAAACACCACCAG-1	-296.548	F_lateRG2	10XE25	F_earlyRG		S45.C5	529.279	RG-div2	21.5
E25_CAAGAAACAGTCACTA-1	-231.128	F_IPC3	10XE25	F_earlyRG		S45.D5	974.115	vRG	21.5
E25_CAAGAAACAGTCAGAG-1	-196.705	F_IPC3	10XE25	F_earlyRG		S45.E5	-989.208	IPC-nEN1	21.5
E25_CAAGAAAGTTAAGATG-1	-273.915	F_lateRG2	10XE25	F_earlyRG		S45.G5	-593.085	OPC	21.5
E25_CAAGAAAGTTCAGGCC-1	-215.173	F_IPC3	10XE25	F_earlyRG		S45.H5	-819.05	OPC	21.5
E25_CAAGAAATCGCCCTTA-1	-157.184	F_IPC3	10XE25	F_earlyRG		S45.B6	287.265	RG-div1	21.5
E25_CAAGATCGTGACGGTA-1	-169.087	F_IPC2	10XE25	F_earlyRG		S45.D7	712.826	Astrocyte	21.5
E25_CAAGATCGTGGCCCTA-1	-228.92	F_lateRG2	10XE25	F_earlyRG		S45.A8	-737.476	OPC	21.5
E25_CAAGATCGTTGAGTTC-1	-246.065	F_lateRG2	10XE25	F_earlyRG		S45.H9	808.702	oRG	21.5
E25_CAAGGCCAGTGTTAGA-1	-189.075	F_IPC3	10XE25	F_earlyRG		S45.B10	-349.907	RG-div2	21.5
E25_CAAGGCCCAACCGCCA-1	-290.487	F_lateRG2	10XE25	F_earlyRG		S45.C10	-428.106	Astrocyte	21.5
E25_CAAGGCCTCACTTCAT-1	-206.933	F_IPC3	10XE25	F_earlyRG		S45.D10	1225.72	oRG	21.5
E25_CAAGGCCTCTGGCGTG-1	-260.462	F_IPC3	10XE25	F_earlyRG		S45.G11	-81.4337	Astrocyte	21.5
E25_CAAGTTGAGACTAGGC-1	-172.059	F_IPC2	10XE25	F_earlyRG		S45.G12	269.104	Astrocyte	21.5
E25_CAAGTTGCACGGATAG-1	-279.592	F_lateRG2	10XE25	F_earlyRG		S46.D1	-1308.84	Astrocyte	21.5
E25_CAAGTTGCACGTGAGA-1	-237.921	F_IPC2	10XE25	F_earlyRG		S46.F1	-871.575	OPC	21.5
E25_CAAGTTGCATCGATGT-1	-183.555	F_lateRG2	10XE25	F_earlyRG		S46.E2	965.369	vRG	21.5
E25_CAAGTTGGTTCCCTTG-1	-261.439	F_lateRG2	10XE25	F_earlyRG		S46.F2	191.606	RG-div1	21.5
E25_CAAGTTGGTTGCGTTA-1	-242.224	F_lateRG2	10XE25	F_earlyRG		S46.D3	878.106	oRG	21.5
E25_CAAGTTGTCTTCCTTC-1	-96.3041	F_IPC2	10XE25	F_earlyRG		S46.G5	1912.48	tRG	21.5
E25_CACAAACAGATGTAAC-1	-251.314	F_lateRG2	10XE25	F_earlyRG		S46.E7	-373.32	IPC-div2	21.5
E25_CACAAACCAAGAAAGG-1	-198.947	F_IPC3	10XE25	F_earlyRG		S46.A10	1034.34	oRG	21.5
E25_CACAAACCATTAGGCT-1	-329.68	F_IPC1	10XE25	F_IPC		S46.C10	-1191.67	IPC-nEN1	21.5
E25_CACAAACGTTCGTGAT-1	-251.153	F_IPC2	10XE25	F_earlyRG		S46.D10	612.892	Astrocyte	21.5
E25_CACAAACGTTGATTCG-1	-243.111	F_lateRG2	10XE25	F_earlyRG		S46.F10	892.023	oRG	21.5
E25_CACAAACGTTGTTTGG-1	-260.721	F_lateRG2	10XE25	F_earlyRG		S46.A12	359.568	RG-div2	21.5
E25_CACACAAAGCGATATA-1	-271.113	F_lateRG2	10XE25	F_earlyRG		S47.D1	-1452.6	OPC	21.5
E25_CACACAAAGCTGAAAT-1	-319.359	F_lateRG2	10XE25	F_earlyRG		S47.G1	-1287.78	IPC-nEN1	21.5
E25_CACACAACAGATCTGT-1	-138.55	F_IPC3	10XE25	F_earlyRG		S47.H1	-1382.59	oRG	21.5
E25_CACACAACATTGAGCT-1	-200.9	F_lateRG2	10XE25	F_earlyRG		S47.H3	-994.068	OPC	21.5
E25_CACACAAGTGCGGTAA-1	-197.124	F_IPC3	10XE25	F_earlyRG		S47.E6	1490.36	oRG	21.5
E25_CACACAAGTTATCCGA-1	-182.159	F_lateRG2	10XE25	F_earlyRG		S47.F7	4.17597	RG-div1	21.5
E25_CACACAATCCCTAACC-1	-145.646	F_lateRG2	10XE25	F_earlyRG		S47.H7	-679.872	Astrocyte	21.5
E25_CACACCTAGCCACGCT-1	-228.975	F_IPC2	10XE25	F_earlyRG		S47.D8	408.866	Astrocyte	21.5
E25_CACACCTAGTGTACGG-1	-278.419	F_lateRG2	10XE25	F_earlyRG		S47.G9	-758.254	Astrocyte	21.5
E25_CACACCTAGTTACCCA-1	-202.719	F_IPC3	10XE25	F_earlyRG		S47.G10	-1167.94	IPC-nEN1	21.5
E25_CACACCTCACATCTTT-1	-195.293	F_IPC3	10XE25	F_earlyRG		S47.E11	321.479	Astrocyte	21.5
E25_CACACCTCACCACCAG-1	-123.914	F_IPC3	10XE25	F_earlyRG		S47.D12	-762.355	OPC	21.5
E25_CACACCTCACTGTCGG-1	-214.602	F_lateRG2	10XE25	F_earlyRG		S47.H12	899.407	oRG	21.5
E25_CACACCTCATACTCTT-1	-316.718	F_lateRG2	10XE25	F_earlyRG		S48.G7	36.8374	Astrocyte	37
E25_CACACCTGTAGCTCCG-1	-235.009	F_lateRG2	10XE25	F_earlyRG		S48.B9	202.941	Astrocyte	37
E25_CACACCTGTATCTGCA-1	-331.28	F_IPC3	10XE25	F_earlyRG		S50.B10	362.517	vRG	11
E25_CACACCTTCAATAAGG-1	-262.018	F_IPC2	10XE25	F_earlyRG		S50.A11	761.156	vRG	11
E25_CACACCTTCGCCGTGA-1	-326.952	F_earlyRG3	10XE25	F_IPC		S50.B11	644.196	RG-div2	11
E25_CACACTCAGCCGCCTA-1	-206.245	F_IPC2	10XE25	F_earlyRG		S50.F11	-495.119	OPC	11
E25_CACACTCCAACTGGCC-1	-157.787	F_IPC2	10XE25	F_earlyRG		S50.G11	430.028	RG-div2	11
E25_CACACTCCAAGTACCT-1	-251.954	F_lateRG2	10XE25	F_earlyRG		S50.H11	60.9394	RG-div2	11
E25_CACACTCCAGCTTCGG-1	-249.032	F_IPC3	10XE25	F_earlyRG		S50.B12	414.869	RG-div2	11
E25_CACACTCGTCCTCCAT-1	-224.884	F_lateRG2	10XE25	F_earlyRG		S50.F12	-49.6015	vRG	11
E25_CACACTCGTTCAGGCC-1	-228.031	F_lateRG2	10XE25	F_earlyRG		S51.C1	-1234.7	IPC-div1	11
E25_CACACTCTCGAATGCT-1	-253.643	F_lateRG2	10XE25	F_earlyRG		S51.E1	-1084.58	tRG	11
E25_CACACTCTCGGAGGTA-1	-229.529	F_lateRG2	10XE25	F_earlyRG		S51.F1	-1377.35	IPC-nEN2	11
E25_CACACTCTCGGTTCGG-1	-150.182	F_IPC2	10XE25	F_earlyRG		S51.H1	-1173.95	IPC-nEN1	11
E25_CACAGGCAGCTAGTTC-1	-218.294	F_IPC2	10XE25	F_earlyRG		S51.A2	498.453	RG-div1	11
E25_CACAGGCAGCTGCGAA-1	-253.967	F_lateRG2	10XE25	F_earlyRG		S51.C3	479.669	vRG	14.5
E25_CACAGGCAGGACTGGT-1	-164.693	F_IPC3	10XE25	F_earlyRG		S51.D3	-935.715	IPC-div1	14.5
E25_CACAGGCGTAGTACCT-1	-252.522	F_lateRG2	10XE25	F_earlyRG		S51.E3	-1098.63	IPC-nEN3	14.5
E25_CACAGGCTCTAAGCCA-1	-214.75	F_lateRG2	10XE25	F_earlyRG		S51.F3	-1241.31	IPC-nEN2	14.5
E25_CACAGTAAGCTAGGCA-1	-181.449	F_lateRG2	10XE25	F_earlyRG		S51.G3	963.952	RG-div1	14.5
E25_CACAGTAAGGCATGTG-1	-255.87	F_lateRG2	10XE25	F_earlyRG		S51.H3	-1243.02	IPC-nEN2	14.5
E25_CACAGTACACGAGAGT-1	-158.695	F_IPC3	10XE25	F_earlyRG		S51.A4	-1273.07	IPC-nEN2	14.5
E25_CACAGTACAGGCTGAA-1	-187.33	F_IPC3	10XE25	F_earlyRG		S51.B4	-1345.63	IPC-nEN2	14.5
E25_CACAGTAGTGAGTGAC-1	-212.646	F_IPC2	10XE25	F_earlyRG		S51.D4	-1457.49	IPC-nEN2	14.5
E25_CACAGTATCTCCTATA-1	-181.718	F_IPC3	10XE25	F_earlyRG		S51.C10	1501.67	RG-div1	13
E25_CACATAGAGATATGGT-1	-145.405	F_IPC2	10XE25	F_earlyRG		S51.E10	1156.26	tRG	13
E25_CACATAGAGTCGTACT-1	-222.402	F_IPC2	10XE25	F_earlyRG		S51.F10	912.827	RG-div2	13
E25_CACATAGAGTGCTGCC-1	-243.9	F_IPC3	10XE25	F_earlyRG		S51.H10	652.658	vRG	13
E25_CACATAGCACGTTGGC-1	-257.619	F_lateRG2	10XE25	F_earlyRG		S51.A11	1554.7	tRG	13
E25_CACATAGGTAAGTAGT-1	-307.709	F_lateRG2	10XE25	F_earlyRG		S51.C11	1248.05	RG-div1	13
E25_CACATAGGTCGAGTTT-1	-228.614	F_lateRG2	10XE25	F_earlyRG		S51.D11	857.416	RG-div1	13
E25_CACATAGGTTATCACG-1	-186.182	F_lateRG2	10XE25	F_earlyRG		S51.E11	-636.804	IPC-div1	13
E25_CACATAGTCTCGCTTG-1	-290.396	F_lateRG2	10XE25	F_earlyRG		S51.H11	-1099.82	IPC-nEN1	13
E25_CACATTTAGAGTCTGG-1	-264.129	F_IPC3	10XE25	F_earlyRG		S51.A12	1681.43	tRG	13
E25_CACATTTAGGACGAAA-1	-202.86	F_IPC2	10XE25	F_earlyRG		S51.C12	-873.801	IPC-div1	13
E25_CACATTTAGGCAAAGA-1	-196.175	F_IPC3	10XE25	F_earlyRG		S51.D12	1586.19	tRG	13
E25_CACATTTCACATTTCT-1	-255.269	F_lateRG2	10XE25	F_earlyRG		S51.F12	1596.81	oRG	13
E25_CACATTTGTTCGGGCT-1	-214.328	F_IPC2	10XE25	F_earlyRG		S51.H12	916.714	RG-div2	13
E25_CACCACTGTGGGTCAA-1	-288.069	F_lateRG2	10XE25	F_earlyRG		S52.F1	-1374.94	IPC-nEN2	13
E25_CACCACTGTTACAGAA-1	-195.014	F_IPC2	10XE25	F_earlyRG		S52.G1	-1339.04	IPC-nEN2	13
E25_CACCAGGAGGTACTCT-1	-233.227	F_IPC2	10XE25	F_earlyRG		S52.B2	-1259.34	IPC-nEN2	13
E25_CACCAGGCAATGGACG-1	-227.563	F_IPC3	10XE25	F_earlyRG		S52.D2	934.103	oRG	13
E25_CACCAGGCATCCGGGT-1	-224.122	F_lateRG2	10XE25	F_earlyRG		S52.G2	-741.868	IPC-div1	13
E25_CACCAGGCATTCTTAC-1	-316.307	F_IPC1	10XE25	F_IPC		S52.H2	-1250.11	IPC-nEN2	13
E25_CACCAGGGTCCGACGT-1	-224.641	F_IPC3	10XE25	F_earlyRG		S52.F3	-937.402	IPC-div1	13
E25_CACCAGGTCGTTTGCC-1	-309.968	F_earlyRG3	10XE25	F_IPC		S52.F7	1407.11	oRG	19
E25_CACCAGGTCTGCAAGT-1	-265.557	F_lateRG2	10XE25	F_earlyRG		S52.F12	-1499.46	IPC-nEN2	14.2
E25_CACCTTGAGAGGTTGC-1	-172.165	F_IPC2	10XE25	F_earlyRG		S53.A1	-1419.01	vRG	14.2
E25_CACCTTGAGGGAAACA-1	-237.126	F_lateRG2	10XE25	F_earlyRG		S53.D1	-1522.1	vRG	14.2
E25_CACCTTGCACCGGAAA-1	-181.607	F_IPC2	10XE25	F_earlyRG		S53.E1	-1433.71	IPC-nEN2	14.2
E25_CACCTTGCATTCTTAC-1	-208.509	F_lateRG2	10XE25	F_earlyRG		S53.F1	577.544	vRG	14.2
E25_CACCTTGTCACGCGGT-1	-217.342	F_lateRG2	10XE25	F_earlyRG		S53.G1	-1105.62	OPC	14.2
E25_CACCTTGTCATACGGT-1	-333.456	F_lateRG2	10XE25	F_earlyRG		S53.H1	-1360.7	IPC-nEN2	14.2
E25_CACTCCAAGGCTAGGT-1	-219.755	F_IPC3	10XE25	F_earlyRG		S53.A2	-1424.5	IPC-nEN2	14.2
E25_CACTCCACAACGATCT-1	-236.408	F_lateRG2	10XE25	F_earlyRG		S53.D2	349.728	vRG	14.2
E25_CACTCCACACCGAAAG-1	-234.579	F_lateRG2	10XE25	F_earlyRG		S53.E2	-1415.4	IPC-nEN2	14.2
E25_CACTCCATCGGAGGTA-1	-197.771	F_IPC3	10XE25	F_earlyRG		S53.D3	-1069.89	IPC-nEN1	14.2
E25_CAGAATCCATCACGAT-1	-264.371	F_lateRG2	10XE25	F_earlyRG		S53.G3	-1121.07	IPC-nEN2	14.2
E25_CAGAATCTCCTTTACA-1	-236.438	F_lateRG2	10XE25	F_earlyRG		S53.A4	-1167.1	IPC-nEN2	14.2
E25_CAGAATCTCTTAGCCC-1	-201.907	F_lateRG2	10XE25	F_earlyRG		S53.D4	62.8828	vRG	14.2
E25_CAGAGAGGTTCTGGTA-1	-221.03	F_lateRG2	10XE25	F_earlyRG		S53.E4	1350.24	tRG	14.2
E25_CAGATCACACAACGTT-1	-225.04	F_lateRG2	10XE25	F_earlyRG		S53.G4	1506.41	tRG	14.2
E25_CAGATCAGTCTCATCC-1	-206.63	F_lateRG2	10XE25	F_earlyRG		S53.C5	251.696	vRG	14.2
E25_CAGATCAGTGTGCGTC-1	-225.3	F_IPC2	10XE25	F_earlyRG		S53.F5	-1114.75	IPC-div2	14.2
E25_CAGCAGCAGTAATCCC-1	-197.397	F_IPC3	10XE25	F_earlyRG		S53.G9	849.045	RG-div2	13.3
E25_CAGCAGCCAGGAATCG-1	-236.858	F_lateRG2	10XE25	F_earlyRG		S53.A10	-374.234	vRG	13.3
E25_CAGCAGCGTATAATGG-1	-202.081	F_IPC3	10XE25	F_earlyRG		S53.D10	414.582	vRG	13.3
E25_CAGCAGCGTCGCTTCT-1	-288.72	F_lateRG2	10XE25	F_earlyRG		S54.A12	890.795	tRG	18.5
E25_CAGCAGCGTGGCGAAT-1	-414.989	F_IPC3	10XE25	F_earlyRG		S54.B12	1045.94	RG-div1	13.3
E25_CAGCATAAGCCGTCGT-1	-266.682	F_lateRG2	10XE25	F_earlyRG		S55.F1	-859.8	IPC-nEN1	13.3
E25_CAGCATACACGGTGTC-1	-157.741	F_IPC3	10XE25	F_earlyRG		S55.G1	474.044	RG-div1	13.3
E25_CAGCATAGTTAGGGTG-1	-174.489	F_IPC2	10XE25	F_earlyRG		S55.B2	-355.17	RG-div2	13.3
E25_CAGCATATCAGTACGT-1	-188.933	F_IPC2	10XE25	F_earlyRG		S55.E3	-809.871	IPC-div2	18.5
E25_CAGCATATCTTGAGAC-1	-266.157	F_lateRG2	10XE25	F_earlyRG		S55.H4	720.625	tRG	18.5
E25_CAGCCGACATGCCACG-1	-227.313	F_IPC3	10XE25	F_earlyRG		S55.A5	-1214.45	IPC-nEN2	18.5
E25_CAGCCGACATGCTAGT-1	-236.71	F_lateRG2	10XE25	F_earlyRG		S55.C5	1114.77	oRG	18.5
E25_CAGCCGATCACAGTAC-1	-253.487	F_lateRG2	10XE25	F_earlyRG		S55.F5	571.135	vRG	18.5
E25_CAGCCGATCCTAGAAC-1	-283.051	F_IPC3	10XE25	F_earlyRG		S56.A1	-1293.79	OPC	13
E25_CAGCCGATCGCCTGTT-1	-176	F_IPC2	10XE25	F_earlyRG		S56.B1	-213.981	vRG	13
E25_CAGCCGATCTATCCCG-1	-100.006	F_IPC3	10XE25	F_earlyRG		S56.C1	-1104.83	IPC-nEN2	13
E25_CAGCCGATCTGAAAGA-1	-243.679	F_IPC2	10XE25	F_earlyRG		S56.A2	-796.472	IPC-nEN3	13
E25_CAGCCGATCTTCATGT-1	-223.878	F_lateRG2	10XE25	F_earlyRG		S56.B3	-540.929	IPC-div2	13
E25_CAGCGACCAAGAGTCG-1	-233.977	F_IPC2	10XE25	F_earlyRG		S56.A4	606.417	vRG	13
E25_CAGCGACCATGTCGAT-1	-326.816	F_lateRG2	10XE25	F_earlyRG		S56.H6	300.318	RG-div2	13
E25_CAGCTAAAGAAAGTGG-1	-376.489	F_IPC1	10XE25	F_IPC		S56.A7	975.319	RG-div2	13
E25_CAGCTAAAGGTGTTAA-1	-180.225	F_lateRG2	10XE25	F_earlyRG		S56.F9	540.933	RG-div1	13
E25_CAGCTAAAGTCCAGGA-1	-191.458	F_IPC2	10XE25	F_earlyRG		S56.A10	-701.404	OPC	13
E25_CAGCTAACAGTAACGG-1	-268.433	F_IPC3	10XE25	F_earlyRG		S56.D10	521.135	RG-div2	13
E25_CAGCTAACATCCGTGG-1	-268.133	F_lateRG2	10XE25	F_earlyRG		S56.G10	702.788	vRG	13
E25_CAGCTGGCACTTCGAA-1	-198.384	F_IPC3	10XE25	F_earlyRG		S56.D11	-1014.74	IPC-div1	13
E25_CAGCTGGTCACCCTCA-1	-179.101	F_IPC2	10XE25	F_earlyRG		S56.H11	650.534	oRG	13
E25_CAGCTGGTCCGTAGGC-1	-227.437	F_IPC2	10XE25	F_earlyRG		S56.G12	553.585	oRG	13
E25_CAGGTGCAGTCAAGCG-1	-231.22	F_IPC2	10XE25	F_earlyRG		S57.D1	-781.699	OPC	20
E25_CAGGTGCCATAGACTC-1	-175.153	F_IPC2	10XE25	F_earlyRG		S57.A3	201.56	vRG	20
E25_CAGGTGCCATGCCACG-1	-320.546	F_earlyRG3	10XE25	F_IPC		S82.B1	-1329.67	RG-div1	11.5
E25_CAGGTGCCATGTCTCC-1	-102.233	F_IPC2	10XE25	F_earlyRG		S82.D1	-1235.34	RG-div2	11.5
E25_CAGTAACAGTCAATAG-1	-206.498	F_lateRG2	10XE25	F_earlyRG		S82.F1	-1251.81	RG-div1	11.5
E25_CAGTAACCAATGGAAT-1	-315.109	F_lateRG2	10XE25	F_earlyRG		S82.G1	-1264.14	IPC-nEN3	11.5
E25_CAGTAACCACGTCAGC-1	-157.119	F_IPC3	10XE25	F_earlyRG		S82.C4	-215.662	vRG	11.5
E25_CAGTAACGTGTTTGGT-1	-360.639	F_lateRG2	10XE25	F_earlyRG		S82.B5	-1433.15	IPC-nEN2	11.5
E25_CAGTAACTCCTAGGGC-1	-182.483	F_IPC2	10XE25	F_earlyRG		S82.C5	626.447	RG-div2	11.5
E25_CAGTCCTAGAAGGGTA-1	-332.49	F_lateRG2	10XE25	F_earlyRG		S82.B6	103.363	vRG	11.5
E25_CAGTCCTAGACTAGAT-1	-241.601	F_IPC2	10XE25	F_earlyRG		S82.E6	16.263	RG-div1	11.5
E25_CAGTCCTAGGTGACCA-1	-207.005	F_IPC2	10XE25	F_earlyRG		S82.G6	-1059.77	IPC-nEN1	11.5
E25_CAGTCCTAGTGGTCCC-1	-276.759	F_lateRG2	10XE25	F_earlyRG		S82.A7	-965.094	IPC-nEN1	11.5
E25_CAGTCCTAGTTGTCGT-1	-209.822	F_lateRG2	10XE25	F_earlyRG		S82.C7	568.389	RG-div2	11.5
E25_CAGTCCTCAGATGAGC-1	-268.573	F_lateRG2	10XE25	F_earlyRG		S82.H7	718.819	RG-div1	11.5
E25_CAGTCCTCATATGCTG-1	-192.953	F_lateRG2	10XE25	F_earlyRG		S82.D9	716.218	RG-div1	11.5
E25_CAGTCCTGTCCGTGAC-1	-218.02	F_lateRG2	10XE25	F_earlyRG		S82.B10	229.381	RG-div1	11.5
E25_CAGTCCTGTTCCCGAG-1	-220.068	F_lateRG2	10XE25	F_earlyRG		S82.G10	-729.693	IPC-nEN3	11.5
E25_CAGTCCTGTTCGTTGA-1	-215.974	F_IPC2	10XE25	F_earlyRG		S82.H10	-81.9757	RG-div2	11.5
E25_CATATGGAGCTACCGC-1	-229.52	F_lateRG2	10XE25	F_earlyRG		S82.F11	384.741	RG-div1	11.5
E25_CATATGGAGGACAGCT-1	-377.259	F_lateRG2	10XE25	F_earlyRG		S82.G11	440.7	RG-div1	11.5
E25_CATATGGAGTTGCAGG-1	-214.803	F_IPC3	10XE25	F_earlyRG		S82.D12	273.697	RG-div2	11.5
E25_CATATGGTCCTAGTGA-1	-213.158	F_IPC3	10XE25	F_earlyRG		S82.G12	331.513	RG-div2	11.5
E25_CATATTCAGATGGCGT-1	-301.848	F_IPC3	10XE25	F_earlyRG		S82.H12	145.762	RG-div2	11.5
E25_CATATTCAGCAGGCTA-1	-144.434	F_IPC2	10XE25	F_earlyRG		S83.A1	-527.403	IPC-div2	11.5
E25_CATATTCAGCGCCTTG-1	-246.265	F_lateRG2	10XE25	F_earlyRG		S83.F2	-20.8374	RG-div2	11.5
E25_CATATTCAGGTACTCT-1	-205.437	F_lateRG2	10XE25	F_earlyRG		S83.A3	30.848	RG-div2	11.5
E25_CATATTCAGTCATGCT-1	-189.496	F_lateRG2	10XE25	F_earlyRG		S83.C3	-741.098	IPC-div1	11.5
E25_CATATTCCACTCGACG-1	-198.012	F_lateRG2	10XE25	F_earlyRG		S83.E3	344.663	RG-div2	11.5
E25_CATATTCCAGACGCCT-1	-285.257	F_lateRG2	10XE25	F_earlyRG		S83.A4	163.403	RG-div1	11.5
E25_CATATTCTCTGACCTC-1	-134.02	F_IPC2	10XE25	F_earlyRG		S83.C4	447.363	RG-div1	11.5
E25_CATCAAGCACGGTAAG-1	-279.098	F_lateRG2	10XE25	F_earlyRG		S83.E4	298.479	RG-div2	11.5
E25_CATCAAGGTAGCGCTC-1	-209.225	F_lateRG2	10XE25	F_earlyRG		S83.H4	494.94	RG-div2	11.5
E25_CATCAAGTCCTAAGTG-1	-264.71	F_lateRG2	10XE25	F_earlyRG		S83.B5	-138.841	RG-div1	11.5
E25_CATCAGAAGGAATCGC-1	-173.748	F_IPC2	10XE25	F_earlyRG		S83.D5	394.044	RG-div2	11.5
E25_CATCAGACAATGGACG-1	-226.82	F_lateRG2	10XE25	F_earlyRG		S83.F5	-16.9161	RG-div1	11.5
E25_CATCAGAGTACAGACG-1	-214.023	F_IPC3	10XE25	F_earlyRG		S83.B6	178.98	RG-div2	11.5
E25_CATCAGAGTACGAAAT-1	-205.785	F_IPC2	10XE25	F_earlyRG		S83.E6	612.705	RG-div1	11.5
E25_CATCAGAGTTCCAACA-1	-222.377	F_IPC3	10XE25	F_earlyRG		S83.G6	411.832	RG-div1	11.5
E25_CATCAGATCATCTGCC-1	-278.506	F_lateRG2	10XE25	F_earlyRG		S83.A7	-842.756	IPC-div1	11.5
E25_CATCAGATCCATGAGT-1	-290.662	F_lateRG2	10XE25	F_earlyRG		S83.E7	381.298	RG-div1	11.5
E25_CATCAGATCTATCCTA-1	-444.262	F_lateRG2	10XE25	F_earlyRG		S83.F7	-907.118	IPC-div1	11.5
E25_CATCCACGTTGATTGC-1	-264.348	F_lateRG2	10XE25	F_earlyRG		S83.G7	-100.479	RG-div1	11.5
E25_CATCCACTCACGAAGG-1	-179.148	F_IPC3	10XE25	F_earlyRG		S83.B8	377.374	RG-div1	11.5
E25_CATCCACTCCGTAGTA-1	-213.366	F_IPC3	10XE25	F_earlyRG		S83.D8	492.613	RG-div2	11.5
E25_CATCCACTCTCTGAGA-1	-198.18	F_IPC2	10XE25	F_earlyRG		S83.E8	64.9091	RG-div2	11.5
E25_CATCGAAAGCGCCTCA-1	-220.522	F_lateRG2	10XE25	F_earlyRG		S83.G8	-303.887	RG-div2	11.5
E25_CATCGAAAGCTGATAA-1	-226.954	F_lateRG2	10XE25	F_earlyRG		S83.H8	-805.961	IPC-div1	11.5
E25_CATCGAAAGGCGATAC-1	-267.547	F_lateRG2	10XE25	F_earlyRG		S83.A9	331.707	RG-div1	11.5
E25_CATCGAACATAAGACA-1	-275.975	F_lateRG2	10XE25	F_earlyRG		S83.C9	248.632	RG-div1	11.5
E25_CATCGAATCACAGGCC-1	-313.655	F_IPC1	10XE25	F_IPC		S84.H7	809.533	RG-div1	13
E25_CATCGGGAGCACAGGT-1	-156.618	F_IPC2	10XE25	F_earlyRG		S84.A8	1127.21	RG-div1	13
E25_CATCGGGCAGATTGCT-1	-313.62	F_IPC3	10XE25	F_earlyRG		S84.D8	-923.477	IPC-nEN1	13
E25_CATCGGGCAGTGAGTG-1	-279.472	F_lateRG2	10XE25	F_earlyRG		S84.F8	247.38	RG-div1	13
E25_CATGACAAGATCTGAA-1	-104.106	F_IPC2	10XE25	F_earlyRG		S84.C9	-504.752	OPC	13
E25_CATGACAAGCGTGAAC-1	-167.397	F_lateRG2	10XE25	F_earlyRG		S84.B10	787.195	RG-div1	13
E25_CATGACAGTAGGACAC-1	-169.941	F_IPC3	10XE25	F_earlyRG		S84.H10	445.476	RG-div2	13
E25_CATGACAGTCCAAGTT-1	-247.084	F_IPC2	10XE25	F_earlyRG		S84.D11	1391.84	tRG	13
E25_CATGCCTAGCGTTGCC-1	-174.639	F_IPC2	10XE25	F_earlyRG		S84.F11	1039.81	RG-div1	13
E25_CATGCCTCAAGAAAGG-1	-185.535	F_IPC2	10XE25	F_earlyRG		S81.A1	746.65	RG-div1	15
E25_CATGCCTCACATAACC-1	-226.498	F_lateRG2	10XE25	F_earlyRG		S81.B1	1370.89	oRG	15
E25_CATGCCTGTCGCCATG-1	-166.412	F_lateRG2	10XE25	F_earlyRG		S81.H1	-1102.34	vRG	15
E25_CATGCCTGTTTCGCTC-1	-208.213	F_lateRG2	10XE25	F_earlyRG		S81.F2	-298.356	vRG	15
E25_CATGCCTTCGGCGGTT-1	-279.707	F_lateRG2	10XE25	F_earlyRG		S81.B3	1158.56	tRG	15
E25_CATGCCTTCTGCCCTA-1	-260.278	F_IPC3	10XE25	F_earlyRG		S81.E3	927.057	RG-div1	15
E25_CATGGCGAGCTAAGAT-1	-173.093	F_IPC3	10XE25	F_earlyRG		S81.F4	1301.95	RG-div1	15
E25_CATGGCGCAACACCTA-1	-170.232	F_lateRG2	10XE25	F_earlyRG		S81.H4	-1235.26	IPC-nEN2	15
E25_CATGGCGCACATCCGG-1	-199.769	F_IPC3	10XE25	F_earlyRG		S81.D5	1012.86	RG-div1	15
E25_CATGGCGCATTATCTC-1	-208.692	F_IPC3	10XE25	F_earlyRG		S81.B8	1353.03	oRG	15
E25_CATGGCGGTAAGAGGA-1	-142.619	F_IPC2	10XE25	F_earlyRG		S81.C10	-979.337	IPC-nEN1	15
E25_CATGGCGGTGCGCTTG-1	-176.536	F_lateRG2	10XE25	F_earlyRG		S81.E11	430.898	RG-div2	15
E25_CATTATCAGAGCCCAA-1	-229.444	F_lateRG2	10XE25	F_earlyRG		S81.B12	1603.15	RG-div2	15
E25_CATTATCCACCGCTAG-1	-166.292	F_IPC3	10XE25	F_earlyRG		S81.H12	115.023	vRG	15
E25_CATTATCGTAGGGTAC-1	-236.003	F_IPC3	10XE25	F_earlyRG		S85.E1	-1307.58	oRG	17.5
E25_CATTATCGTCTCCCTA-1	-123.136	F_lateRG2	10XE25	F_earlyRG		S85.C4	1709.06	tRG	17.5
E25_CATTATCTCTTATCTG-1	-210	F_IPC3	10XE25	F_earlyRG		S85.F4	-500.388	IPC-div2	17.5
E25_CATTCGCAGTTAGGTA-1	-150.723	F_lateRG2	10XE25	F_earlyRG		S85.A7	-627.759	IPC-nEN1	17.5
E25_CATTCGCGTCACACGC-1	-181.142	F_IPC3	10XE25	F_earlyRG		S85.E10	342.366	oRG	17.5
E25_CATTCGCGTTCCCTTG-1	-259.86	F_lateRG2	10XE25	F_earlyRG		S86.C1	-1266.99	IPC-nEN2	17.5
E25_CATTCGCTCGCAAGCC-1	-273.917	F_lateRG2	10XE25	F_earlyRG		S86.A3	1358.16	tRG	17.5
E25_CATTCGCTCTTAACCT-1	-227.513	F_IPC2	10XE25	F_earlyRG		S86.B4	1045.17	oRG	17.5
E25_CATTCGCTCTTAGAGC-1	-209.278	F_IPC3	10XE25	F_earlyRG		S86.B6	1734.35	tRG	17.5
E25_CCAATCCAGCCACCTG-1	-261.245	F_lateRG2	10XE25	F_earlyRG		S86.D9	-984.266	IPC-nEN1	17.5
E25_CCAATCCCAACGCACC-1	-244.124	F_IPC2	10XE25	F_earlyRG		S86.B11	1431.2	RG-div1	17.5
E25_CCAATCCCAACTGCGC-1	-174.985	F_IPC2	10XE25	F_earlyRG		S86.C11	-1225.54	IPC-nEN2	17.5
E25_CCAATCCCAAGCTGGA-1	-267.07	F_IPC2	10XE25	F_earlyRG		S86.B12	734.293	oRG	17.5
E25_CCAATCCCATATGAGA-1	-144.518	F_IPC3	10XE25	F_earlyRG		S87.G6	705.423	oRG	17.5
E25_CCAATCCGTAAATGTG-1	-170.751	F_IPC2	10XE25	F_earlyRG		S87.G11	1123.69	tRG	17.5
E25_CCACCTAAGGTGCTTT-1	-129.698	F_IPC2	10XE25	F_earlyRG		S87.D12	422.188	vRG	17.5
E25_CCACCTACAAGTACCT-1	-201.667	F_IPC3	10XE25	F_earlyRG		S88.C1	-1337.43	RG-div1	13
E25_CCACCTACACGGTAGA-1	-237.361	F_lateRG2	10XE25	F_earlyRG		S88.D1	-1384.31	RG-div1	13
E25_CCACCTACATAAAGGT-1	-311.238	F_lateRG2	10XE25	F_earlyRG		S88.C2	991.984	oRG	13
E25_CCACCTATCTATCGCC-1	-172.066	F_IPC2	10XE25	F_earlyRG		S88.D3	-802.532	IPC-nEN1	13
E25_CCACCTATCTTCTGGC-1	-191.886	F_lateRG2	10XE25	F_earlyRG		S88.B7	300.174	RG-div1	13
E25_CCACGGACACCCAGTG-1	-228.91	F_IPC2	10XE25	F_earlyRG		S88.D11	232.117	RG-div1	13
E25_CCACGGACAGCGTTCG-1	-218.395	F_IPC3	10XE25	F_earlyRG		S88.B12	792.327	RG-div1	13
E25_CCACGGACATTCTTAC-1	-194.848	F_IPC3	10XE25	F_earlyRG		S88.C12	531.324	RG-div1	13
E25_CCACGGAGTATAGTAG-1	-214.67	F_lateRG2	10XE25	F_earlyRG		S91.E1	1197.74	RG-div1	16
E25_CCACGGAGTCGTCTTC-1	-238.911	F_lateRG2	10XE25	F_earlyRG		S91.F1	758.479	tRG	16
E25_CCACGGATCATTATCC-1	-216.114	F_lateRG2	10XE25	F_earlyRG		S91.C2	1550.34	tRG	16
E25_CCACGGATCTTGTACT-1	-267.836	F_lateRG2	10XE25	F_earlyRG		S91.A3	1806.31	tRG	16
E25_CCACTACTCCAAGCCG-1	-238.791	F_lateRG2	10XE25	F_earlyRG		S91.C3	625.185	vRG	16
E25_CCAGCGAAGTACGATA-1	-189.227	F_IPC2	10XE25	F_earlyRG		S91.H3	962.776	RG-div2	16
E25_CCAGCGAAGTGCCAGA-1	-262.391	F_lateRG2	10XE25	F_earlyRG		S91.B5	402.106	RG-div2	16
E25_CCAGCGACATGTCGAT-1	-240.519	F_lateRG2	10XE25	F_earlyRG		S91.C5	1222.54	RG-div1	16
E25_CCAGCGAGTCACTTCC-1	-248.403	F_IPC3	10XE25	F_earlyRG		S91.G6	-1318.65	IPC-nEN2	16
E25_CCAGCGATCCTAGTGA-1	-224.919	F_IPC2	10XE25	F_earlyRG		S91.D8	-655.792	OPC	16
E25_CCATGTCGTGTGACCC-1	-178.6	F_IPC2	10XE25	F_earlyRG		S91.F8	-876.666	IPC-nEN1	16
E25_CCATGTCGTGTGACGA-1	-197.542	F_IPC3	10XE25	F_earlyRG		S92.A1	-976.459	vRG	16
E25_CCATGTCTCTAGCACA-1	-251.489	F_lateRG2	10XE25	F_earlyRG		S92.C1	-1250.47	Astrocyte	16
E25_CCATTCGAGAGCTTCT-1	-267.183	F_IPC3	10XE25	F_earlyRG		S92.E1	-1450.84	vRG	16
E25_CCATTCGAGCTATGCT-1	-236.054	F_lateRG2	10XE25	F_earlyRG		S92.F1	-1434.4	IPC-div2	16
E25_CCATTCGAGTTCGCAT-1	-281.64	F_lateRG2	10XE25	F_earlyRG		S92.G1	-1219.28	IPC-div2	16
E25_CCATTCGGTGAGGCTA-1	-240.961	F_IPC2	10XE25	F_earlyRG		S92.H1	-1497.97	vRG	16
E25_CCATTCGGTGGCTCCA-1	-224.139	F_lateRG2	10XE25	F_earlyRG		S92.G2	-33.6905	RG-div2	16
E25_CCATTCGGTGGTAACG-1	-327.49	F_lateRG2	10XE25	F_earlyRG		S92.A5	-468.567	RG-div2	16.5
E25_CCATTCGGTTCCGTCT-1	-220.203	F_lateRG2	10XE25	F_earlyRG		S92.E5	-285.34	vRG	16.5
E25_CCATTCGTCCGCGGTA-1	-191.442	F_IPC2	10XE25	F_earlyRG		S92.G7	-1325.04	IPC-nEN3	16.5
E25_CCCAATCAGACGCAAC-1	-223.898	F_lateRG2	10XE25	F_earlyRG		S92.A9	-353.585	vRG	16.5
E25_CCCAATCAGCGTGAAC-1	-151.755	F_IPC2	10XE25	F_earlyRG		S92.A10	-1092.53	vRG	16.5
E25_CCCAATCAGGGTGTTG-1	-70.3825	F_lateRG2	10XE25	F_earlyRG		S92.E10	75.9636	vRG	16.5
E25_CCCAATCCACGGTAAG-1	-267.577	F_IPC2	10XE25	F_earlyRG		S92.G10	-1210.81	IPC-div2	16.5
E25_CCCAATCCAGCCAGAA-1	-237.702	F_IPC2	10XE25	F_earlyRG		S92.H11	-397.584	vRG	16.5
E25_CCCAATCGTATTACCG-1	-233.913	F_lateRG2	10XE25	F_earlyRG		S92.C12	-78.2094	Astrocyte	16.5
E25_CCCAATCTCTTCGGTC-1	-242.785	F_lateRG2	10XE25	F_earlyRG		S92.F12	-1035.47	IPC-div2	16.5
E25_CCCAGTTAGCAGGCTA-1	-270.913	F_lateRG2	10XE25	F_earlyRG		S93.B1	-1027.17	IPC-nEN3	16.5
E25_CCCAGTTAGCTACCGC-1	-153.465	F_lateRG2	10XE25	F_earlyRG		S93.C4	1001.56	oRG	13
E25_CCCAGTTAGCTCTCGG-1	-251.763	F_lateRG2	10XE25	F_earlyRG		S93.E4	-614.635	IPC-div2	13
E25_CCCAGTTAGGCATGGT-1	-230.485	F_lateRG2	10XE25	F_earlyRG		S93.B6	-1033.57	IPC-nEN3	13
E25_CCCAGTTTCCACGACG-1	-210.983	F_lateRG2	10XE25	F_earlyRG		S93.H6	-553.267	IPC-nEN3	13
E25_CCCAGTTTCCACGTTC-1	-182.845	F_IPC3	10XE25	F_earlyRG		S93.E8	549.843	tRG	13
E25_CCCAGTTTCCATGAGT-1	-187.839	F_lateRG2	10XE25	F_earlyRG		S93.B9	-886.817	IPC-nEN3	13
E25_CCCAGTTTCTCGTTTA-1	-140.8	F_IPC2	10XE25	F_earlyRG		S93.B10	-681.608	IPC-nEN3	13
E25_CCCATACCACGTGAGA-1	-179.94	F_lateRG2	10XE25	F_earlyRG		S93.C10	628.424	RG-div1	13
E25_CCCATACCACTGCCAG-1	-221.567	F_lateRG2	10XE25	F_earlyRG		S93.E10	648.271	vRG	13
E25_CCCATACCACTTAAGC-1	-243.715	F_IPC3	10XE25	F_earlyRG		S93.C11	110.368	RG-div1	13
E25_CCCATACGTGCAACTT-1	-178.551	F_IPC3	10XE25	F_earlyRG		S93.H12	362.617	vRG	7
E25_CCCATACTCTCAAGTG-1	-236.544	F_lateRG2	10XE25	F_earlyRG		S94.B2	-1219.54	IPC-nEN2	13
E25_CCCTCCTAGCCGCCTA-1	-193.818	F_lateRG2	10XE25	F_earlyRG		S94.E2	133.932	tRG	13
E25_CCCTCCTGTAGCTCCG-1	-273.044	F_lateRG2	10XE25	F_earlyRG		S94.A3	269.783	RG-div2	13
E25_CCCTCCTGTCATATGC-1	-211.487	F_IPC2	10XE25	F_earlyRG		S94.D4	379.053	vRG	13
E25_CCGGGATAGCGATTCT-1	-215.464	F_IPC3	10XE25	F_earlyRG		S94.F4	-237.648	RG-div1	13
E25_CCGGGATAGTCATCCA-1	-313.579	F_IPC2	10XE25	F_earlyRG		S94.G4	-1327.61	IPC-nEN2	13
E25_CCGGGATCACGACGAA-1	-233.577	F_IPC2	10XE25	F_earlyRG		S94.D5	-1085.84	IPC-nEN2	13
E25_CCGGGATCAGGGTACA-1	-233.698	F_lateRG2	10XE25	F_earlyRG		S94.C6	256.56	RG-div1	13
E25_CCGGGATCAGTCGATT-1	-208.668	F_IPC2	10XE25	F_earlyRG		S94.D6	-929.767	IPC-nEN1	13
E25_CCGGGATCATGCAACT-1	-219.414	F_lateRG2	10XE25	F_earlyRG		S94.B7	57.8566	RG-div2	13
E25_CCGGGATGTGTGGCTC-1	-185.948	F_IPC3	10XE25	F_earlyRG		S94.H7	-958.419	IPC-div1	13
E25_CCGGGATGTTAAGTAG-1	-175.73	F_IPC2	10XE25	F_earlyRG		S94.H12	307.708	vRG	13
E25_CCGGGATTCAGGCGAA-1	-241.89	F_IPC2	10XE25	F_earlyRG		S95.D1	1128.32	tRG	13
E25_CCGGGATTCATTCACT-1	-254.251	F_IPC3	10XE25	F_earlyRG		S95.B3	154.922	RG-div2	13
E25_CCGGTAGAGGCATGGT-1	-201.906	F_IPC2	10XE25	F_earlyRG		S95.H3	-1259.37	IPC-nEN2	13
E25_CCGGTAGAGTTACCCA-1	-199.289	F_IPC2	10XE25	F_earlyRG		S95.D4	430.603	RG-div1	13
E25_CCGGTAGGTAGCTAAA-1	-242.211	F_lateRG2	10XE25	F_earlyRG		S95.H4	-1234.15	IPC-nEN2	13
E25_CCGTACTCAAATACAG-1	-315.694	F_earlyRG3	10XE25	F_IPC		S95.C5	999.13	vRG	13
E25_CCGTACTCAAGTACCT-1	-185.927	F_lateRG2	10XE25	F_earlyRG		S95.H5	302.587	vRG	13
E25_CCGTACTGTCACAAGG-1	-204.842	F_IPC2	10XE25	F_earlyRG		S95.C8	-1392.12	IPC-nEN2	13
E25_CCGTACTGTCGCCATG-1	-194.068	F_IPC3	10XE25	F_earlyRG		S95.C9	434.404	tRG	13
E25_CCGTGGAAGCACACAG-1	-234.379	F_lateRG2	10XE25	F_earlyRG		S95.D11	78.0069	vRG	13
E25_CCGTGGACACGCCAGT-1	-344.161	F_lateRG2	10XE25	F_earlyRG		S96.C2	-331.988	IPC-div2	14
E25_CCGTGGACAGTCGTGC-1	-247.885	F_IPC2	10XE25	F_earlyRG		S96.A3	1455.26	tRG	14
E25_CCGTGGAGTAAGTGTA-1	-224.247	F_lateRG2	10XE25	F_earlyRG		S96.F6	-838.569	IPC-div2	14
E25_CCGTGGAGTCGTGGCT-1	-166.643	F_IPC3	10XE25	F_earlyRG		S96.C8	-1231.56	IPC-nEN2	14
E25_CCGTGGATCAGCTTAG-1	-340.605	F_lateRG2	10XE25	F_earlyRG		S96.F10	615.155	RG-div2	14
E25_CCGTTCAAGAAGGCCT-1	-196.927	F_lateRG2	10XE25	F_earlyRG		S103.C2	1546.59	oRG	17
E25_CCGTTCAAGATGTTAG-1	-257.371	F_lateRG2	10XE25	F_earlyRG		S103.B3	1294.43	RG-div2	17
E25_CCGTTCACAAGTACCT-1	-138.754	F_IPC2	10XE25	F_earlyRG		S113.F1	-838.509	OPC	21.5
E25_CCGTTCACAGCTGTAT-1	-317.147	F_lateRG2	10XE25	F_earlyRG		S113.E3	-862.637	OPC	21.5
E25_CCGTTCATCAAAGACA-1	-259.307	F_lateRG2	10XE25	F_earlyRG		S113.H3	-1251.13	OPC	21.5
E25_CCGTTCATCTCGATGA-1	-215.587	F_IPC2	10XE25	F_earlyRG		S113.B5	299.839	Astrocyte	21.5
E25_CCGTTCATCTTGCAAG-1	-134.832	F_IPC2	10XE25	F_earlyRG		S113.F6	-755.19	OPC	21.5
E25_CCTAAAGAGAATGTGT-1	-219.642	F_IPC2	10XE25	F_earlyRG		S113.F8	-641.165	Astrocyte	21.5
E25_CCTAAAGCAACGCACC-1	-135.688	F_lateRG2	10XE25	F_earlyRG		S113.B10	290.928	Astrocyte	21.5
E25_CCTAAAGGTCTTGTCC-1	-371.963	F_earlyRG3	10XE25	F_IPC		S114.F9	-548.497	Astrocyte	22
E25_CCTAAAGTCAGATAAG-1	-238.241	F_lateRG2	10XE25	F_earlyRG		S115.D7	29.4701	Astrocyte	22
E25_CCTACACAGACCCACC-1	-192.208	F_lateRG2	10XE25	F_earlyRG		S116.C7	-533.706	OPC	22
E25_CCTACACCAGGGTATG-1	-215.601	F_lateRG2	10XE25	F_earlyRG		S140.B1	-1378.51	oRG	20
E25_CCTACACGTACGACCC-1	-200.944	F_IPC3	10XE25	F_earlyRG		S140.B2	549.572	vRG	20
E25_CCTACCAGTGTCGCTG-1	-203.508	F_IPC2	10XE25	F_earlyRG		S140.C2	401.848	RG-div1	20
E25_CCTACCATCATGTAGC-1	-261.167	F_lateRG2	10XE25	F_earlyRG		S140.E2	1037.49	oRG	20
E25_CCTAGCTCAAGTCATC-1	-255.194	F_lateRG2	10XE25	F_earlyRG		S140.B3	956.621	RG-div2	20
E25_CCTAGCTCAGGGTTAG-1	-217.529	F_IPC3	10XE25	F_earlyRG		S140.C3	-217.386	IPC-nEN3	20
E25_CCTAGCTGTCCAAGTT-1	-306.124	F_IPC3	10XE25	F_earlyRG		S140.B6	-1311.4	IPC-nEN2	20
E25_CCTATTAAGACACTAA-1	-294.23	F_IPC1	10XE25	F_IPC		S140.C6	-341.901	IPC-nEN3	20
E25_CCTATTAAGTCGTACT-1	-252.414	F_lateRG2	10XE25	F_earlyRG		S140.F6	747.19	RG-div1	20
E25_CCTATTACACAGGAGT-1	-224.414	F_lateRG2	10XE25	F_earlyRG		S140.G6	870.173	oRG	20
E25_CCTATTACAGACTCGC-1	-261.926	F_IPC3	10XE25	F_earlyRG		S140.A7	1404.96	oRG	20
E25_CCTATTACATTTGCCC-1	-207.252	F_IPC3	10XE25	F_earlyRG		S140.D7	2124.56	tRG	20
E25_CCTATTAGTTGCGCAC-1	-225.808	F_lateRG2	10XE25	F_earlyRG		S140.C9	1778.13	oRG	20
E25_CCTATTATCAACACAC-1	-248.985	F_lateRG2	10XE25	F_earlyRG		S140.A10	-599.189	IPC-nEN3	20
E25_CCTATTATCTTGTACT-1	-200.109	F_IPC3	10XE25	F_earlyRG		S140.G10	1136.61	oRG	20
E25_CCTCAGTAGAAGATTC-1	-234.712	F_lateRG2	10XE25	F_earlyRG		S140.B11	1697.02	oRG	20
E25_CCTCAGTCAACACCCG-1	-220.81	F_IPC2	10XE25	F_earlyRG		S140.G11	564.807	Astrocyte	20
E25_CCTCAGTCACCGAATT-1	-190.975	F_lateRG2	10XE25	F_earlyRG		S140.D12	-595.587	IPC-div1	20
E25_CCTCTGAAGAGGTTAT-1	-229.898	F_IPC2	10XE25	F_earlyRG		S177.C1	-871.186	IPC-nEN1	18
E25_CCTCTGAAGGATGGTC-1	-391.005	F_IPC2	10XE25	F_earlyRG		S177.G1	-334.531	RG-div2	18
E25_CCTCTGACACGGTAGA-1	-234.5	F_IPC2	10XE25	F_earlyRG		S177.G2	-416.632	RG-div1	18
E25_CCTCTGACAGCTGTGC-1	-252.25	F_IPC3	10XE25	F_earlyRG		S177.C7	6.20052	RG-div2	18
E25_CCTCTGACATCTCGCT-1	-249.648	F_lateRG2	10XE25	F_earlyRG		S177.E7	-60.752	vRG	18
E25_CCTCTGAGTAGCGATG-1	-215.55	F_IPC2	10XE25	F_earlyRG		S177.A8	-716.313	RG-div2	18
E25_CCTCTGAGTCTGATCA-1	-164.222	F_IPC3	10XE25	F_earlyRG		S177.A9	-335.572	RG-div2	18
E25_CCTCTGAGTTCAACCA-1	-202.394	F_IPC2	10XE25	F_earlyRG		S177.C11	-1217.77	IPC-nEN1	18
E25_CCTCTGATCATTTGGG-1	-281.822	F_lateRG2	10XE25	F_earlyRG		S189.A1	-442.886	RG-early	8
E25_CCTTACGAGCGATATA-1	-225.467	F_lateRG2	10XE25	F_earlyRG		S189.G3	-945.427	RG-early	8
E25_CCTTACGAGCGTGAGT-1	-209.184	F_IPC2	10XE25	F_earlyRG		S189.B4	-291.901	RG-early	8
E25_CCTTACGCAAGACACG-1	-174.154	F_IPC2	10XE25	F_earlyRG		S189.C4	-848.285	RG-early	8
E25_CCTTACGCAAGCGATG-1	-196.059	F_IPC3	10XE25	F_earlyRG		S189.E4	-522.689	RG-early	8
E25_CCTTACGGTCGCTTTC-1	-218.296	F_IPC2	10XE25	F_earlyRG		S189.C5	-289.218	RG-early	8
E25_CCTTACGGTTGCGTTA-1	-187.205	F_IPC3	10XE25	F_earlyRG		S189.E5	-864.152	RG-early	8
E25_CCTTACGGTTGTGGAG-1	-224.845	F_IPC3	10XE25	F_earlyRG		S189.E6	-1001.63	RG-early	8
E25_CCTTACGTCATTGCGA-1	-180.155	F_lateRG2	10XE25	F_earlyRG		S189.H7	-610.107	RG-early	8
E25_CCTTCCCAGGAATTAC-1	-167.296	F_lateRG2	10XE25	F_earlyRG		S189.H9	-686.05	RG-early	8
E25_CCTTCCCAGGTAGCCA-1	-211.351	F_IPC3	10XE25	F_earlyRG		S189.D10	-575.641	RG-early	8
E25_CCTTCCCAGTACACCT-1	-319.548	F_lateRG2	10XE25	F_earlyRG		S189.A11	-469.869	RG-early	8
E25_CCTTCCCAGTACGTTC-1	-201.26	F_IPC2	10XE25	F_earlyRG		S189.D11	-544.545	RG-early	8
E25_CCTTCCCAGTCCGGTC-1	-174.436	F_IPC2	10XE25	F_earlyRG		S189.G11	-750.256	RG-early	8
E25_CCTTCCCCACACCGAC-1	-228.287	F_IPC2	10XE25	F_earlyRG		S189.C12	-754.128	RG-early	8
E25_CCTTCCCCACCGATAT-1	-161.45	F_IPC2	10XE25	F_earlyRG		S189.F12	-671.382	RG-early	8
E25_CCTTCCCCACTAGTAC-1	-196.045	F_lateRG2	10XE25	F_earlyRG		S190.D1	-656.576	RG-early	8
E25_CCTTCCCCAGATAATG-1	-278.686	F_IPC2	10XE25	F_earlyRG		S190.H1	-1216.02	RG-early	8
E25_CCTTCCCGTAGAAGGA-1	-236.169	F_IPC3	10XE25	F_earlyRG		S190.C2	-1119.11	RG-early	8
E25_CCTTCCCTCCAGAAGG-1	-213.385	F_lateRG2	10XE25	F_earlyRG		S190.B3	-838.212	RG-early	8
E25_CCTTCCCTCCCAACGG-1	-249.636	F_IPC2	10XE25	F_earlyRG		S190.D3	-924.325	RG-early	8
E25_CCTTCCCTCTGCTGTC-1	-127.546	F_lateRG2	10XE25	F_earlyRG		S190.F3	-804.996	RG-early	8
E25_CCTTCGAAGAGTTGGC-1	-325.035	F_lateRG2	10XE25	F_earlyRG		S190.H3	-515.191	RG-early	8
E25_CCTTCGAAGCCCTAAT-1	-305.181	F_midRG	10XE25	F_midRG		S190.E4	-589.961	RG-early	8
E25_CCTTCGAGTCGAAAGC-1	-220.473	F_IPC3	10XE25	F_earlyRG		S190.F4	-1023.61	RG-early	8
E25_CCTTCGAGTTCCAACA-1	-245.195	F_lateRG2	10XE25	F_earlyRG		S190.A5	-637.844	RG-early	8
E25_CCTTCGATCCGTCAAA-1	-219.362	F_lateRG2	10XE25	F_earlyRG		S190.C5	-893.956	RG-early	8
E25_CCTTCGATCGAACGGA-1	-230.31	F_IPC2	10XE25	F_earlyRG		S190.C6	-1149.16	RG-early	8
E25_CCTTTCTAGTCAATAG-1	-241.644	F_lateRG2	10XE25	F_earlyRG		S190.A7	-669.271	RG-early	8
E25_CCTTTCTCAGGATTGG-1	-233.459	F_IPC3	10XE25	F_earlyRG		S190.B7	-906.683	RG-early	8
E25_CCTTTCTTCTGAAAGA-1	-182.792	F_lateRG2	10XE25	F_earlyRG		S190.C7	-812.47	RG-early	8
E25_CCTTTCTTCTTCATGT-1	-248.901	F_lateRG2	10XE25	F_earlyRG		S190.E7	-780.825	RG-early	8
E25_CGAACATAGTGAACGC-1	-270.931	F_lateRG2	10XE25	F_earlyRG		S190.F7	-524.091	RG-early	8
E25_CGAACATCAGACTCGC-1	-200.146	F_lateRG2	10XE25	F_earlyRG		S190.F8	-668.975	RG-early	8
E25_CGAACATCATCTCCCA-1	-204.243	F_lateRG2	10XE25	F_earlyRG		S190.D9	-761.563	RG-early	8
E25_CGAACATGTATGGTTC-1	-186.216	F_lateRG2	10XE25	F_earlyRG		S190.H9	-657.684	RG-early	8
E25_CGAACATGTCACTTCC-1	-253.773	F_lateRG2	10XE25	F_earlyRG		S190.A10	-639.342	RG-early	8
E25_CGAACATGTGATGTGG-1	-260.784	F_lateRG2	10XE25	F_earlyRG		S190.C10	-372.463	RG-early	8
E25_CGAACATGTTAGATGA-1	-170.447	F_lateRG2	10XE25	F_earlyRG		S190.D10	-722.5	RG-early	8
E25_CGAACATGTTCGGCAC-1	-162.749	F_lateRG2	10XE25	F_earlyRG		S190.F11	-613.438	RG-early	8
E25_CGAACATTCCGAGCCA-1	-227.917	F_lateRG2	10XE25	F_earlyRG		S190.H11	-1100.72	RG-early	8
E25_CGAACATTCTGTCTAT-1	-174.318	F_lateRG2	10XE25	F_earlyRG		S190.A12	-856.49	RG-early	8
E25_CGAATGTAGATCGATA-1	-271.935	F_lateRG2	10XE25	F_earlyRG		S190.E12	-1038.27	RG-early	8
E25_CGAATGTAGGATGGTC-1	-295.325	F_IPC3	10XE25	F_earlyRG		S190.F12	-698.65	RG-early	8
E25_CGAATGTCAATGGAAT-1	-218.533	F_lateRG2	10XE25	F_earlyRG		S190.H12	-1051.87	RG-early	8
E25_CGAATGTCAGCTGTGC-1	-270.68	F_lateRG2	10XE25	F_earlyRG		S222.C6	-1146.26	RG-early	5.85
E25_CGAATGTGTGCAGACA-1	-200.593	F_lateRG2	10XE25	F_earlyRG		S222.E11	-504.628	RG-early	5.85
E25_CGAATGTGTTGGTAAA-1	-216.714	F_IPC2	10XE25	F_earlyRG		S222.F4	-639.401	RG-early	5.85
E25_CGACCTTAGATGCCTT-1	-210.063	F_lateRG2	10XE25	F_earlyRG		S222.G6	-559.749	RG-early	5.85
E25_CGACCTTAGTGATCGG-1	-205.705	F_IPC2	10XE25	F_earlyRG		S222.G8	-390.73	RG-early	5.85
E25_CGACCTTCACAGACAG-1	-184.882	F_IPC2	10XE25	F_earlyRG		S222.H4	-500.038	RG-early	5.85
E25_CGACCTTCACGTTGGC-1	-258.845	F_lateRG2	10XE25	F_earlyRG		S222.H7	-669.316	RG-early	5.85
E25_CGACCTTCAGCCACCA-1	-242.788	F_lateRG2	10XE25	F_earlyRG
E25_CGACCTTCATAGTAAG-1	-254.422	F_lateRG2	10XE25	F_earlyRG
E25_CGACCTTTCATTCACT-1	-235.225	F_lateRG2	10XE25	F_earlyRG
E25_CGACCTTTCGTGACAT-1	-295.655	F_lateRG2	10XE25	F_earlyRG
E25_CGACTTCAGATGTCGG-1	-259.176	F_IPC2	10XE25	F_earlyRG
E25_CGACTTCCAAGCGATG-1	-210.659	F_IPC3	10XE25	F_earlyRG
E25_CGAGAAGAGAGAACAG-1	-218.196	F_lateRG2	10XE25	F_earlyRG
E25_CGAGAAGAGAGGTACC-1	-176.812	F_lateRG2	10XE25	F_earlyRG
E25_CGAGAAGCACGGCCAT-1	-231.15	F_lateRG2	10XE25	F_earlyRG
E25_CGAGAAGCATTATCTC-1	-216.118	F_lateRG2	10XE25	F_earlyRG
E25_CGAGAAGGTTGATTGC-1	-329.84	F_earlyRG3	10XE25	F_IPC
E25_CGAGAAGTCATCATTC-1	-325.475	F_lateRG2	10XE25	F_earlyRG
E25_CGAGCACAGACAGACC-1	-183.24	F_lateRG2	10XE25	F_earlyRG
E25_CGAGCACGTTTGACAC-1	-168.901	F_IPC3	10XE25	F_earlyRG
E25_CGAGCACTCTCGGACG-1	-239.557	F_lateRG2	10XE25	F_earlyRG
E25_CGAGCCAAGGATGGAA-1	-282.779	F_lateRG2	10XE25	F_earlyRG
E25_CGAGCCACACCAACCG-1	-174.963	F_IPC2	10XE25	F_earlyRG
E25_CGAGCCACACCAGGCT-1	-222.908	F_lateRG2	10XE25	F_earlyRG
E25_CGAGCCAGTAAGGGCT-1	-223.253	F_lateRG2	10XE25	F_earlyRG
E25_CGAGCCAGTTATCACG-1	-155.033	F_IPC3	10XE25	F_earlyRG
E25_CGATCGGAGAGACTTA-1	-169.845	F_IPC2	10XE25	F_earlyRG
E25_CGATCGGAGATAGGAG-1	-209.566	F_lateRG2	10XE25	F_earlyRG
E25_CGATCGGAGGCGTACA-1	-152.162	F_lateRG2	10XE25	F_earlyRG
E25_CGATCGGAGTTTCCTT-1	-172.168	F_IPC2	10XE25	F_earlyRG
E25_CGATCGGCATGTCTCC-1	-232.494	F_IPC3	10XE25	F_earlyRG
E25_CGATCGGGTAGCGTAG-1	-167.467	F_IPC2	10XE25	F_earlyRG
E25_CGATCGGGTCCGTGAC-1	-341.215	F_earlyRG3	10XE25	F_IPC
E25_CGATCGGGTGTGAATA-1	-279.858	F_lateRG2	10XE25	F_earlyRG
E25_CGATCGGTCCTGCAGG-1	-251.609	F_lateRG2	10XE25	F_earlyRG
E25_CGATCGGTCGTATCAG-1	-239.006	F_lateRG2	10XE25	F_earlyRG
E25_CGATGGCAGACTTTCG-1	-171.486	F_lateRG2	10XE25	F_earlyRG
E25_CGATGGCGTACCGAGA-1	-141.224	F_IPC2	10XE25	F_earlyRG
E25_CGATGGCTCGTGGACC-1	-163.217	F_IPC2	10XE25	F_earlyRG
E25_CGATGGCTCTCTAGGA-1	-210.116	F_lateRG2	10XE25	F_earlyRG
E25_CGATGTACAGTGAGTG-1	-249.564	F_IPC2	10XE25	F_earlyRG
E25_CGATTGACAATACGCT-1	-278.223	F_lateRG2	10XE25	F_earlyRG
E25_CGATTGACACACATGT-1	-169.879	F_IPC3	10XE25	F_earlyRG
E25_CGATTGACAGGTCCAC-1	-194.011	F_IPC2	10XE25	F_earlyRG
E25_CGATTGACATCCTTGC-1	-228.717	F_lateRG2	10XE25	F_earlyRG
E25_CGATTGAGTAAGTTCC-1	-234.766	F_IPC3	10XE25	F_earlyRG
E25_CGATTGAGTTTGTTTC-1	-229.839	F_IPC3	10XE25	F_earlyRG
E25_CGCCAAGGTAAGTAGT-1	-193.321	F_IPC3	10XE25	F_earlyRG
E25_CGCGGTAAGAGTGACC-1	-201.136	F_IPC3	10XE25	F_earlyRG
E25_CGCGGTAAGGATTCGG-1	-360.351	F_lateRG2	10XE25	F_earlyRG
E25_CGCGGTAGTTAAAGAC-1	-119.396	F_lateRG2	10XE25	F_earlyRG
E25_CGCGGTATCCTTCAAT-1	-216.918	F_lateRG2	10XE25	F_earlyRG
E25_CGCGTTTAGACAAGCC-1	-208.592	F_IPC2	10XE25	F_earlyRG
E25_CGCGTTTAGATGCCTT-1	-229.899	F_IPC2	10XE25	F_earlyRG
E25_CGCGTTTAGCGACGTA-1	-248.727	F_lateRG2	10XE25	F_earlyRG
E25_CGCGTTTAGCGGATCA-1	-250.802	F_lateRG2	10XE25	F_earlyRG
E25_CGCGTTTCAGGTTTCA-1	-289.12	F_IPC2	10XE25	F_earlyRG
E25_CGCGTTTCATGCTGGC-1	-160.644	F_lateRG2	10XE25	F_earlyRG
E25_CGCGTTTGTTGAACTC-1	-206.641	F_lateRG2	10XE25	F_earlyRG
E25_CGCTATCAGTGTTGAA-1	-211.297	F_IPC2	10XE25	F_earlyRG
E25_CGCTATCGTGAAGGCT-1	-262.57	F_lateRG2	10XE25	F_earlyRG
E25_CGCTATCTCCTTGCCA-1	-79.4101	F_IPC2	10XE25	F_earlyRG
E25_CGCTGGACAAGCGTAG-1	-170.646	F_IPC2	10XE25	F_earlyRG
E25_CGCTGGATCCACGACG-1	-256.661	F_lateRG2	10XE25	F_earlyRG
E25_CGCTTCAAGGTAGCCA-1	-257.767	F_lateRG2	10XE25	F_earlyRG
E25_CGGACACAGCTGGAAC-1	-302.764	F_earlyRG3	10XE25	F_IPC
E25_CGGACACCAGTCAGAG-1	-233.072	F_IPC3	10XE25	F_earlyRG
E25_CGGACACCATTTGCTT-1	-146.962	F_IPC2	10XE25	F_earlyRG
E25_CGGACACGTAAACCTC-1	-247.747	F_lateRG2	10XE25	F_earlyRG
E25_CGGACACGTACTCTCC-1	-254.111	F_lateRG2	10XE25	F_earlyRG
E25_CGGACACGTCAAAGAT-1	-269.252	F_IPC3	10XE25	F_earlyRG
E25_CGGACACGTTTGACAC-1	-304.22	F_lateRG2	10XE25	F_earlyRG
E25_CGGACACTCAGGCCCA-1	-188.62	F_lateRG2	10XE25	F_earlyRG
E25_CGGACACTCGTTTAGG-1	-216.427	F_IPC2	10XE25	F_earlyRG
E25_CGGACGTCAGTCAGAG-1	-190.643	F_IPC2	10XE25	F_earlyRG
E25_CGGACGTGTCTAGTGT-1	-233.593	F_lateRG2	10XE25	F_earlyRG
E25_CGGACGTTCACGACTA-1	-318.224	F_lateRG2	10XE25	F_earlyRG
E25_CGGACGTTCAGTACGT-1	-169.86	F_lateRG2	10XE25	F_earlyRG
E25_CGGACGTTCCTTTCTC-1	-180.876	F_IPC3	10XE25	F_earlyRG
E25_CGGACGTTCTACTCAT-1	-186.597	F_IPC2	10XE25	F_earlyRG
E25_CGGACTGCAAATACAG-1	-204.437	F_lateRG2	10XE25	F_earlyRG
E25_CGGACTGCAGTGGGAT-1	-177.242	F_IPC3	10XE25	F_earlyRG
E25_CGGACTGTCTTGCCGT-1	-259.819	F_lateRG2	10XE25	F_earlyRG
E25_CGGAGCTGTCTAGTGT-1	-237.691	F_lateRG2	10XE25	F_earlyRG
E25_CGGAGCTTCCGGCACA-1	-307.961	F_IPC1	10XE25	F_IPC
E25_CGGAGTCAGCTCTCGG-1	-208.387	F_IPC2	10XE25	F_earlyRG
E25_CGGAGTCAGGTCATCT-1	-215.652	F_lateRG2	10XE25	F_earlyRG
E25_CGGAGTCCACCCAGTG-1	-167.778	F_lateRG2	10XE25	F_earlyRG
E25_CGGAGTCCATACTCTT-1	-148.7	F_IPC2	10XE25	F_earlyRG
E25_CGGAGTCGTTAGAACA-1	-217.551	F_lateRG2	10XE25	F_earlyRG
E25_CGGCTAGCAAACTGCT-1	-176.527	F_lateRG2	10XE25	F_earlyRG
E25_CGGCTAGCACAACGCC-1	-196.561	F_lateRG2	10XE25	F_earlyRG
E25_CGGCTAGCATAGACTC-1	-315.569	F_earlyRG3	10XE25	F_IPC
E25_CGGCTAGGTGTAACGG-1	-212.4	F_lateRG2	10XE25	F_earlyRG
E25_CGGCTAGTCATCTGTT-1	-138.689	F_IPC3	10XE25	F_earlyRG
E25_CGGCTAGTCGTTGCCT-1	-181.455	F_IPC3	10XE25	F_earlyRG
E25_CGGGTCAAGCTTCGCG-1	-230.137	F_lateRG2	10XE25	F_earlyRG
E25_CGGGTCAAGGTAAACT-1	-200.807	F_lateRG2	10XE25	F_earlyRG
E25_CGGGTCACACACAGAG-1	-163.583	F_IPC2	10XE25	F_earlyRG
E25_CGGGTCACACGAAACG-1	-224.139	F_lateRG2	10XE25	F_earlyRG
E25_CGGGTCACAGATCCAT-1	-258.672	F_lateRG2	10XE25	F_earlyRG
E25_CGGGTCATCCACTGGG-1	-204.106	F_IPC3	10XE25	F_earlyRG
E25_CGGTTAACAGCCTTGG-1	-230.238	F_lateRG2	10XE25	F_earlyRG
E25_CGGTTAATCACATGCA-1	-355.174	F_lateRG2	10XE25	F_earlyRG
E25_CGTAGCGAGCCGCCTA-1	-251.991	F_IPC2	10XE25	F_earlyRG
E25_CGTAGCGAGGAGTTTA-1	-208.36	F_IPC2	10XE25	F_earlyRG
E25_CGTAGCGAGTACGCGA-1	-210.725	F_IPC3	10XE25	F_earlyRG
E25_CGTAGCGCACCACCAG-1	-221.01	F_lateRG2	10XE25	F_earlyRG
E25_CGTAGCGCATCCGTGG-1	-185.151	F_lateRG2	10XE25	F_earlyRG
E25_CGTAGCGCATCCTAGA-1	-159.853	F_lateRG2	10XE25	F_earlyRG
E25_CGTAGCGGTATCTGCA-1	-277.288	F_lateRG2	10XE25	F_earlyRG
E25_CGTAGCGGTGTCCTCT-1	-235.741	F_lateRG2	10XE25	F_earlyRG
E25_CGTAGCGTCGCATGAT-1	-154.55	F_IPC2	10XE25	F_earlyRG
E25_CGTAGGCAGACCACGA-1	-234.244	F_IPC2	10XE25	F_earlyRG
E25_CGTAGGCAGAGACTTA-1	-162.488	F_IPC2	10XE25	F_earlyRG
E25_CGTAGGCCATCGGAAG-1	-200.056	F_IPC2	10XE25	F_earlyRG
E25_CGTAGGCTCGTCACGG-1	-218.234	F_lateRG2	10XE25	F_earlyRG
E25_CGTCACTAGAGACGAA-1	-126.618	F_IPC3	10XE25	F_earlyRG
E25_CGTCACTAGCCGTCGT-1	-194.279	F_IPC3	10XE25	F_earlyRG
E25_CGTCACTCAGATGGCA-1	-305.78	F_lateRG2	10XE25	F_earlyRG
E25_CGTCACTGTATATGAG-1	-227.052	F_IPC3	10XE25	F_earlyRG
E25_CGTCACTGTCTTCAAG-1	-174.082	F_IPC3	10XE25	F_earlyRG
E25_CGTCACTGTGTTTGGT-1	-244.705	F_lateRG2	10XE25	F_earlyRG
E25_CGTCACTTCCAAAGTC-1	-221.349	F_lateRG2	10XE25	F_earlyRG
E25_CGTCAGGCAGCCAGAA-1	-340.079	F_lateRG2	10XE25	F_earlyRG
E25_CGTCAGGGTCTAAAGA-1	-171.853	F_lateRG2	10XE25	F_earlyRG
E25_CGTCAGGTCCCTCAGT-1	-185.075	F_IPC2	10XE25	F_earlyRG
E25_CGTCAGGTCCTCATTA-1	-244.826	F_IPC2	10XE25	F_earlyRG
E25_CGTCCATCAGACAGGT-1	-251.38	F_IPC2	10XE25	F_earlyRG
E25_CGTCCATCAGATGAGC-1	-145.189	F_IPC2	10XE25	F_earlyRG
E25_CGTCTACAGTGGACGT-1	-139.689	F_lateRG2	10XE25	F_earlyRG
E25_CGTCTACCACAGTCGC-1	-228.908	F_lateRG2	10XE25	F_earlyRG
E25_CGTCTACCAGCGAACA-1	-307.702	F_lateRG2	10XE25	F_earlyRG
E25_CGTGAGCAGCCAGTTT-1	-222.524	F_IPC3	10XE25	F_earlyRG
E25_CGTGAGCGTCACCCAG-1	-227.099	F_lateRG2	10XE25	F_earlyRG
E25_CGTGAGCGTGACTACT-1	-325.337	F_lateRG2	10XE25	F_earlyRG
E25_CGTGAGCTCAGGTTCA-1	-204.835	F_lateRG2	10XE25	F_earlyRG
E25_CGTGAGCTCCCAGGTG-1	-175.216	F_IPC2	10XE25	F_earlyRG
E25_CGTGAGCTCTACTCAT-1	-192.061	F_IPC3	10XE25	F_earlyRG
E25_CGTGTAAAGGCAGGTT-1	-219.678	F_IPC2	10XE25	F_earlyRG
E25_CGTGTAAAGTCGATAA-1	-222.164	F_lateRG2	10XE25	F_earlyRG
E25_CGTGTAACAAGACACG-1	-215.42	F_IPC3	10XE25	F_earlyRG
E25_CGTGTAATCTAAGCCA-1	-97.9097	F_IPC2	10XE25	F_earlyRG
E25_CGTGTCTCAACACCTA-1	-235.51	F_lateRG2	10XE25	F_earlyRG
E25_CGTGTCTCACATGTGT-1	-205.812	F_lateRG2	10XE25	F_earlyRG
E25_CGTGTCTGTGTGAAAT-1	-235.122	F_IPC2	10XE25	F_earlyRG
E25_CGTGTCTTCAAAGTAG-1	-202.955	F_lateRG2	10XE25	F_earlyRG
E25_CGTTAGACATCCTAGA-1	-190.274	F_lateRG2	10XE25	F_earlyRG
E25_CGTTAGAGTGTTCTTT-1	-245.806	F_lateRG2	10XE25	F_earlyRG
E25_CGTTAGATCCGGGTGT-1	-273.285	F_lateRG2	10XE25	F_earlyRG
E25_CGTTAGATCGGATGGA-1	-265.532	F_lateRG2	10XE25	F_earlyRG
E25_CGTTCTGCAGTATCTG-1	-229.625	F_IPC2	10XE25	F_earlyRG
E25_CGTTCTGCATACGCCG-1	-161.813	F_lateRG2	10XE25	F_earlyRG
E25_CGTTCTGTCACCAGGC-1	-188.832	F_IPC2	10XE25	F_earlyRG
E25_CGTTGGGGTAGCTTGT-1	-172.801	F_lateRG2	10XE25	F_earlyRG
E25_CGTTGGGTCATCGGAT-1	-239.428	F_lateRG2	10XE25	F_earlyRG
E25_CGTTGGGTCCTTCAAT-1	-184.183	F_lateRG2	10XE25	F_earlyRG
E25_CGTTGGGTCGGATGTT-1	-248.63	F_lateRG2	10XE25	F_earlyRG
E25_CTAACTTAGGTGCACA-1	-289.775	F_lateRG2	10XE25	F_earlyRG
E25_CTAACTTAGTATCTCG-1	-202.509	F_IPC2	10XE25	F_earlyRG
E25_CTAACTTCAGATGAGC-1	-282.741	F_lateRG2	10XE25	F_earlyRG
E25_CTAACTTTCACCTCGT-1	-351.29	F_lateRG2	10XE25	F_earlyRG
E25_CTAACTTTCATCTGTT-1	-155.398	F_lateRG2	10XE25	F_earlyRG
E25_CTAACTTTCTTAGCCC-1	-234.486	F_IPC2	10XE25	F_earlyRG
E25_CTAACTTTCTTCATGT-1	-231.34	F_lateRG2	10XE25	F_earlyRG
E25_CTAAGACAGAAAGTGG-1	-136.34	F_IPC2	10XE25	F_earlyRG
E25_CTAAGACAGCCGCCTA-1	-244.123	F_lateRG2	10XE25	F_earlyRG
E25_CTAAGACAGCTGTCTA-1	-290.105	F_IPC3	10XE25	F_earlyRG
E25_CTAAGACCACACCGAC-1	-203.806	F_IPC2	10XE25	F_earlyRG
E25_CTAAGACCATATGGTC-1	-235.555	F_IPC2	10XE25	F_earlyRG
E25_CTAAGACTCCACGAAT-1	-73.2377	F_IPC2	10XE25	F_earlyRG
E25_CTAAGACTCGTCGTTC-1	-168.041	F_IPC3	10XE25	F_earlyRG
E25_CTAATGGTCCAAATGC-1	-226.11	F_IPC2	10XE25	F_earlyRG
E25_CTACACCAGTGGAGAA-1	-160.804	F_lateRG2	10XE25	F_earlyRG
E25_CTACACCCACCGAAAG-1	-274.984	F_lateRG2	10XE25	F_earlyRG
E25_CTACACCGTGGTTTCA-1	-259.814	F_lateRG2	10XE25	F_earlyRG
E25_CTACACCGTGTGAAAT-1	-378.113	F_lateRG2	10XE25	F_earlyRG
E25_CTACACCGTTACGCGC-1	-236.783	F_lateRG2	10XE25	F_earlyRG
E25_CTACACCGTTCAGTAC-1	-199.485	F_IPC2	10XE25	F_earlyRG
E25_CTACACCTCAGCATGT-1	-256.665	F_lateRG2	10XE25	F_earlyRG
E25_CTACATTAGCGTAGTG-1	-147.894	F_IPC2	10XE25	F_earlyRG
E25_CTACATTAGGACAGAA-1	-200.13	F_lateRG2	10XE25	F_earlyRG
E25_CTACATTGTCAATACC-1	-173.496	F_IPC2	10XE25	F_earlyRG
E25_CTACATTTCACCTCGT-1	-263.235	F_IPC3	10XE25	F_earlyRG
E25_CTACATTTCGTAGGTT-1	-242.225	F_lateRG2	10XE25	F_earlyRG
E25_CTACATTTCTTCGGTC-1	-159.824	F_IPC3	10XE25	F_earlyRG
E25_CTACATTTCTTTACAC-1	-245.824	F_lateRG2	10XE25	F_earlyRG
E25_CTACCCACAGCAGTTT-1	-296.675	F_IPC3	10XE25	F_earlyRG
E25_CTACCCACAGTATAAG-1	-258.985	F_IPC3	10XE25	F_earlyRG
E25_CTACCCACAGTCTTCC-1	-155.298	F_IPC3	10XE25	F_earlyRG
E25_CTACCCATCACAACGT-1	-224.569	F_IPC2	10XE25	F_earlyRG
E25_CTACGTCAGCGCTTAT-1	-268.013	F_lateRG2	10XE25	F_earlyRG
E25_CTACGTCAGTTAGGTA-1	-261.911	F_IPC2	10XE25	F_earlyRG
E25_CTACGTCCAACAACCT-1	-200.317	F_lateRG2	10XE25	F_earlyRG
E25_CTACGTCCACGCATCG-1	-259.379	F_lateRG2	10XE25	F_earlyRG
E25_CTACGTCCAGCTCGAC-1	-220.272	F_IPC2	10XE25	F_earlyRG
E25_CTACGTCGTAGCGCAA-1	-225.319	F_IPC3	10XE25	F_earlyRG
E25_CTACGTCGTTAAAGTG-1	-191.997	F_lateRG2	10XE25	F_earlyRG
E25_CTACGTCTCAACGGCC-1	-166.506	F_IPC2	10XE25	F_earlyRG
E25_CTAGAGTAGAAACCAT-1	-148.39	F_IPC2	10XE25	F_earlyRG
E25_CTAGAGTGTACCGGCT-1	-224.806	F_IPC2	10XE25	F_earlyRG
E25_CTAGAGTTCTCCCTGA-1	-339.759	F_lateRG2	10XE25	F_earlyRG
E25_CTAGCCTCAGGTCTCG-1	-251.853	F_IPC3	10XE25	F_earlyRG
E25_CTAGCCTCATAGTAAG-1	-216.42	F_lateRG2	10XE25	F_earlyRG
E25_CTAGCCTGTGAGGGTT-1	-193.865	F_IPC2	10XE25	F_earlyRG
E25_CTAGCCTTCAAGCCTA-1	-270.815	F_IPC3	10XE25	F_earlyRG
E25_CTAGTGAAGACTAGAT-1	-207.412	F_lateRG2	10XE25	F_earlyRG
E25_CTAGTGACAATGAAAC-1	-257.288	F_lateRG2	10XE25	F_earlyRG
E25_CTAGTGAGTAAATGTG-1	-267.252	F_lateRG2	10XE25	F_earlyRG
E25_CTAGTGAGTTCGTCTC-1	-164.77	F_IPC2	10XE25	F_earlyRG
E25_CTAGTGATCGTGACAT-1	-194.71	F_IPC2	10XE25	F_earlyRG
E25_CTAGTGATCTGCTTGC-1	-253.466	F_lateRG2	10XE25	F_earlyRG
E25_CTCACACAGAAGATTC-1	-168.357	F_IPC2	10XE25	F_earlyRG
E25_CTCACACCACGCATCG-1	-338.514	F_earlyRG3	10XE25	F_IPC
E25_CTCACACGTAAAGTCA-1	-197.779	F_IPC2	10XE25	F_earlyRG
E25_CTCACACTCTTGTCAT-1	-195.553	F_IPC2	10XE25	F_earlyRG
E25_CTCAGAAAGAGTACCG-1	-190.935	F_lateRG2	10XE25	F_earlyRG
E25_CTCAGAATCCTCATTA-1	-241.898	F_IPC3	10XE25	F_earlyRG
E25_CTCAGAATCCTGCAGG-1	-143.19	F_IPC2	10XE25	F_earlyRG
E25_CTCAGAATCGGAGGTA-1	-193.287	F_lateRG2	10XE25	F_earlyRG
E25_CTCATTAAGCAGGTCA-1	-202.69	F_IPC2	10XE25	F_earlyRG
E25_CTCATTAAGTTGAGAT-1	-205.415	F_IPC2	10XE25	F_earlyRG
E25_CTCATTACACAGGCCT-1	-228.611	F_lateRG2	10XE25	F_earlyRG
E25_CTCATTACACCTGGTG-1	-204.083	F_IPC2	10XE25	F_earlyRG
E25_CTCATTACATCGGGTC-1	-240.224	F_lateRG2	10XE25	F_earlyRG
E25_CTCATTATCCAAACAC-1	-193.789	F_lateRG2	10XE25	F_earlyRG
E25_CTCATTATCTGCTGCT-1	-247.882	F_IPC3	10XE25	F_earlyRG
E25_CTCCTAGAGGAGTACC-1	-293.532	F_lateRG2	10XE25	F_earlyRG
E25_CTCCTAGCATGAAGTA-1	-183.43	F_IPC3	10XE25	F_earlyRG
E25_CTCGAAAAGACAAGCC-1	-129.672	F_IPC2	10XE25	F_earlyRG
E25_CTCGAAAAGGCAGTCA-1	-326.01	F_lateRG2	10XE25	F_earlyRG
E25_CTCGAAACACCGAATT-1	-228.703	F_IPC2	10XE25	F_earlyRG
E25_CTCGAAACACTCAGGC-1	-152.607	F_IPC2	10XE25	F_earlyRG
E25_CTCGAAAGTAAAGGAG-1	-230.706	F_IPC2	10XE25	F_earlyRG
E25_CTCGAAATCCGTTGCT-1	-198.58	F_lateRG2	10XE25	F_earlyRG
E25_CTCGAAATCCTGCAGG-1	-260.059	F_lateRG2	10XE25	F_earlyRG
E25_CTCGAGGAGCGTCTAT-1	-188.807	F_lateRG2	10XE25	F_earlyRG
E25_CTCGAGGAGTGAAGAG-1	-213.146	F_lateRG2	10XE25	F_earlyRG
E25_CTCGAGGCAATAGCGG-1	-254.873	F_lateRG2	10XE25	F_earlyRG
E25_CTCGAGGGTCTCACCT-1	-250.02	F_lateRG2	10XE25	F_earlyRG
E25_CTCGAGGTCGACCAGC-1	-112.976	F_lateRG2	10XE25	F_earlyRG
E25_CTCGAGGTCTACTCAT-1	-251.61	F_lateRG2	10XE25	F_earlyRG
E25_CTCGGAGGTCGACTAT-1	-230.093	F_lateRG2	10XE25	F_earlyRG
E25_CTCGGGAAGATCGGGT-1	-314.103	F_IPC3	10XE25	F_earlyRG
E25_CTCGGGAGTCGCATAT-1	-307.34	F_lateRG2	10XE25	F_earlyRG
E25_CTCGGGATCAAACCGT-1	-417.459	F_midRG	10XE25	F_midRG
E25_CTCGGGATCCAGATCA-1	-131.365	F_IPC2	10XE25	F_earlyRG
E25_CTCGTACAGCGCTCCA-1	-278.489	F_IPC2	10XE25	F_earlyRG
E25_CTCGTACAGCTCCTCT-1	-215.123	F_IPC3	10XE25	F_earlyRG
E25_CTCGTACCACCACCAG-1	-205.413	F_lateRG2	10XE25	F_earlyRG
E25_CTCGTACCAGCTGTTA-1	-260.729	F_lateRG2	10XE25	F_earlyRG
E25_CTCGTACCATTGAGCT-1	-143.544	F_IPC2	10XE25	F_earlyRG
E25_CTCGTACGTCCGTTAA-1	-194.619	F_IPC2	10XE25	F_earlyRG
E25_CTCGTACTCAGTGCAT-1	-234.179	F_lateRG2	10XE25	F_earlyRG
E25_CTCGTACTCCAATGGT-1	-238.837	F_IPC2	10XE25	F_earlyRG
E25_CTCGTACTCCCTAACC-1	-202.828	F_lateRG2	10XE25	F_earlyRG
E25_CTCGTACTCGTCTGAA-1	-138.065	F_IPC3	10XE25	F_earlyRG
E25_CTCGTACTCTAACTGG-1	-271.908	F_lateRG2	10XE25	F_earlyRG
E25_CTCGTCAAGATCCTGT-1	-235.828	F_lateRG2	10XE25	F_earlyRG
E25_CTCGTCAAGATCTGCT-1	-251.964	F_IPC2	10XE25	F_earlyRG
E25_CTCGTCACATTGTGCA-1	-152.744	F_lateRG2	10XE25	F_earlyRG
E25_CTCGTCAGTCATCCCT-1	-222.191	F_lateRG2	10XE25	F_earlyRG
E25_CTCGTCATCTTGTTTG-1	-259.703	F_lateRG2	10XE25	F_earlyRG
E25_CTCTAATAGAAGGACA-1	-216.468	F_IPC2	10XE25	F_earlyRG
E25_CTCTAATAGGAGTCTG-1	-257.678	F_lateRG2	10XE25	F_earlyRG
E25_CTCTAATAGGCAAAGA-1	-195.606	F_lateRG2	10XE25	F_earlyRG
E25_CTCTAATCACACCGAC-1	-216.7	F_IPC3	10XE25	F_earlyRG
E25_CTCTAATCATCCTAGA-1	-199.629	F_IPC3	10XE25	F_earlyRG
E25_CTCTAATGTCGAAAGC-1	-437.84	F_IPC3	10XE25	F_earlyRG
E25_CTCTAATGTGAACCTT-1	-195.626	F_lateRG2	10XE25	F_earlyRG
E25_CTCTACGAGAAACGAG-1	-236.12	F_IPC2	10XE25	F_earlyRG
E25_CTCTACGAGATGCCTT-1	-279.282	F_lateRG2	10XE25	F_earlyRG
E25_CTCTACGAGTGCCAGA-1	-249.733	F_IPC3	10XE25	F_earlyRG
E25_CTCTACGGTACCGAGA-1	-241.155	F_lateRG2	10XE25	F_earlyRG
E25_CTCTACGGTAGAGCTG-1	-200.594	F_lateRG2	10XE25	F_earlyRG
E25_CTCTACGGTTAGTGGG-1	-259.705	F_lateRG2	10XE25	F_earlyRG
E25_CTCTGGTAGTCCAGGA-1	-257.398	F_IPC2	10XE25	F_earlyRG
E25_CTCTGGTCATCGATTG-1	-156.152	F_IPC2	10XE25	F_earlyRG
E25_CTCTGGTGTAGGCATG-1	-221.58	F_lateRG2	10XE25	F_earlyRG
E25_CTCTGGTTCAGTACGT-1	-205.187	F_lateRG2	10XE25	F_earlyRG
E25_CTGAAACGTCATATGC-1	-200.39	F_IPC3	10XE25	F_earlyRG
E25_CTGAAACGTCGCTTCT-1	-187.587	F_IPC2	10XE25	F_earlyRG
E25_CTGAAGTAGGTGACCA-1	-322.747	F_earlyRG3	10XE25	F_IPC
E25_CTGAAGTGTGCGAAAC-1	-236.116	F_lateRG2	10XE25	F_earlyRG
E25_CTGAAGTGTTGGACCC-1	-303.314	F_IPC3	10XE25	F_earlyRG
E25_CTGAAGTTCATTCACT-1	-197.777	F_lateRG2	10XE25	F_earlyRG
E25_CTGATAGAGAGCTGCA-1	-271.892	F_IPC3	10XE25	F_earlyRG
E25_CTGATCCCACTGTGTA-1	-184.514	F_IPC3	10XE25	F_earlyRG
E25_CTGATCCCAGTCACTA-1	-277.469	F_lateRG2	10XE25	F_earlyRG
E25_CTGATCCGTCACTGGC-1	-330.284	F_earlyRG3	10XE25	F_IPC
E25_CTGATCCGTCTCATCC-1	-103.786	F_IPC2	10XE25	F_earlyRG
E25_CTGATCCGTGAGGGAG-1	-274.08	F_lateRG2	10XE25	F_earlyRG
E25_CTGCCTAAGATATACG-1	-254.874	F_lateRG2	10XE25	F_earlyRG
E25_CTGCCTAAGTGCAAGC-1	-187.35	F_IPC2	10XE25	F_earlyRG
E25_CTGCCTACATCTCGCT-1	-220.949	F_IPC2	10XE25	F_earlyRG
E25_CTGCCTAGTAAGGATT-1	-207.117	F_lateRG2	10XE25	F_earlyRG
E25_CTGCCTAGTCCGAACC-1	-164.741	F_lateRG2	10XE25	F_earlyRG
E25_CTGCCTAGTTGCCTCT-1	-177.205	F_lateRG2	10XE25	F_earlyRG
E25_CTGCCTAGTTTGACAC-1	-295.625	F_lateRG2	10XE25	F_earlyRG
E25_CTGCGGAAGGCTAGAC-1	-203.156	F_IPC3	10XE25	F_earlyRG
E25_CTGCGGACATCGTCGG-1	-386.447	F_earlyRG3	10XE25	F_IPC
E25_CTGCGGACATCTCGCT-1	-275.47	F_lateRG2	10XE25	F_earlyRG
E25_CTGCGGAGTGGCCCTA-1	-182.347	F_IPC2	10XE25	F_earlyRG
E25_CTGCGGATCGGCGGTT-1	-280.149	F_IPC2	10XE25	F_earlyRG
E25_CTGCTGTAGGAACTGC-1	-245.851	F_lateRG2	10XE25	F_earlyRG
E25_CTGCTGTGTAGGACAC-1	-287.072	F_IPC2	10XE25	F_earlyRG
E25_CTGCTGTGTTACTGAC-1	-235.642	F_lateRG2	10XE25	F_earlyRG
E25_CTGCTGTGTTCATGGT-1	-152.063	F_IPC3	10XE25	F_earlyRG
E25_CTGCTGTTCTTGTACT-1	-239.181	F_lateRG2	10XE25	F_earlyRG
E25_CTGCTGTTCTTGTTTG-1	-193.378	F_IPC3	10XE25	F_earlyRG
E25_CTGCTGTTCTTTACGT-1	-210.085	F_lateRG2	10XE25	F_earlyRG
E25_CTGGTCTAGTGGACGT-1	-189.384	F_IPC2	10XE25	F_earlyRG
E25_CTGGTCTGTCTTGTCC-1	-184.469	F_IPC2	10XE25	F_earlyRG
E25_CTGGTCTTCCATGCTC-1	-269.074	F_lateRG2	10XE25	F_earlyRG
E25_CTGGTCTTCTTTACAC-1	-163.178	F_IPC3	10XE25	F_earlyRG
E25_CTGTGCTAGCGTAATA-1	-211.8	F_lateRG2	10XE25	F_earlyRG
E25_CTGTGCTAGCTCAACT-1	-181.781	F_IPC2	10XE25	F_earlyRG
E25_CTGTGCTTCGCCCTTA-1	-163.418	F_IPC2	10XE25	F_earlyRG
E25_CTGTGCTTCGCGGATC-1	-151.261	F_lateRG2	10XE25	F_earlyRG
E25_CTGTGCTTCTCATTCA-1	-244.036	F_lateRG2	10XE25	F_earlyRG
E25_CTGTTTAAGCGACGTA-1	-281.449	F_lateRG2	10XE25	F_earlyRG
E25_CTTAACTAGGCGATAC-1	-217.977	F_IPC2	10XE25	F_earlyRG
E25_CTTAACTAGGCTCTTA-1	-239.725	F_lateRG2	10XE25	F_earlyRG
E25_CTTAACTCAAGCCATT-1	-176.642	F_IPC2	10XE25	F_earlyRG
E25_CTTAACTCAGTCTTCC-1	-305.776	F_lateRG2	10XE25	F_earlyRG
E25_CTTAACTCATTCTCAT-1	-211.086	F_IPC3	10XE25	F_earlyRG
E25_CTTAACTGTCCGAACC-1	-211.305	F_lateRG2	10XE25	F_earlyRG
E25_CTTAACTGTTCGCGAC-1	-268.207	F_IPC2	10XE25	F_earlyRG
E25_CTTAACTTCCTGCTTG-1	-174.25	F_IPC2	10XE25	F_earlyRG
E25_CTTACCGCAAGGACAC-1	-216.334	F_IPC2	10XE25	F_earlyRG
E25_CTTACCGGTGGTACAG-1	-181.652	F_lateRG2	10XE25	F_earlyRG
E25_CTTACCGTCATGGTCA-1	-211.755	F_IPC3	10XE25	F_earlyRG
E25_CTTAGGAAGCTACCTA-1	-209.605	F_IPC3	10XE25	F_earlyRG
E25_CTTAGGAAGGTCGGAT-1	-235.956	F_lateRG2	10XE25	F_earlyRG
E25_CTTAGGACACACCGAC-1	-191.339	F_lateRG2	10XE25	F_earlyRG
E25_CTTAGGACAGCCAATT-1	-201.839	F_lateRG2	10XE25	F_earlyRG
E25_CTTAGGAGTAGCGTGA-1	-227.442	F_IPC2	10XE25	F_earlyRG
E25_CTTCTCTAGTCAATAG-1	-255.652	F_IPC2	10XE25	F_earlyRG
E25_CTTCTCTGTGGAAAGA-1	-214.244	F_lateRG2	10XE25	F_earlyRG
E25_CTTCTCTGTTGCGTTA-1	-209.641	F_IPC3	10XE25	F_earlyRG
E25_CTTGGCTAGTATGACA-1	-241.249	F_IPC3	10XE25	F_earlyRG
E25_CTTGGCTGTCCTGCTT-1	-249.614	F_lateRG2	10XE25	F_earlyRG
E25_CTTTGCGCACCAACCG-1	-273.78	F_IPC3	10XE25	F_earlyRG
E25_CTTTGCGCAGGGTACA-1	-321.64	F_IPC1	10XE25	F_IPC
E25_CTTTGCGGTAAGCACG-1	-199.689	F_lateRG2	10XE25	F_earlyRG
E25_CTTTGCGGTACCGCTG-1	-188.411	F_lateRG2	10XE25	F_earlyRG
E25_CTTTGCGGTCTCATCC-1	-282.079	F_lateRG2	10XE25	F_earlyRG
E25_CTTTGCGGTGTCAATC-1	-251.745	F_lateRG2	10XE25	F_earlyRG
E25_CTTTGCGTCACTGGGC-1	-214.576	F_lateRG2	10XE25	F_earlyRG
E25_CTTTGCGTCCTAGGGC-1	-246.493	F_IPC3	10XE25	F_earlyRG
E25_CTTTGCGTCGCCTGTT-1	-321.052	F_IPC3	10XE25	F_earlyRG
E25_GAAACTCGTCGACTAT-1	-185.915	F_lateRG2	10XE25	F_earlyRG
E25_GAAACTCTCCTATTCA-1	-187.683	F_IPC3	10XE25	F_earlyRG
E25_GAAACTCTCGGAGGTA-1	-186.958	F_lateRG2	10XE25	F_earlyRG
E25_GAAATGAAGACAAAGG-1	-264.08	F_lateRG2	10XE25	F_earlyRG
E25_GAAATGAAGATCGGGT-1	-269.076	F_IPC3	10XE25	F_earlyRG
E25_GAAATGAAGGTAAACT-1	-177.926	F_IPC3	10XE25	F_earlyRG
E25_GAAATGACAACTGCGC-1	-250.754	F_IPC2	10XE25	F_earlyRG
E25_GAAATGAGTCTAACGT-1	-238.078	F_lateRG2	10XE25	F_earlyRG
E25_GAAATGATCCTAAGTG-1	-254.904	F_lateRG2	10XE25	F_earlyRG
E25_GAAATGATCGCCTGAG-1	-164.839	F_IPC2	10XE25	F_earlyRG
E25_GAACATCAGTTAGGTA-1	-252.277	F_IPC2	10XE25	F_earlyRG
E25_GAACATCCAATCGGTT-1	-261.064	F_lateRG2	10XE25	F_earlyRG
E25_GAACATCGTAGGAGTC-1	-202.877	F_lateRG2	10XE25	F_earlyRG
E25_GAACCTAAGAAGAAGC-1	-273.523	F_lateRG2	10XE25	F_earlyRG
E25_GAACCTAAGGGTCGAT-1	-159.943	F_IPC2	10XE25	F_earlyRG
E25_GAACCTACAAGAGGCT-1	-247.576	F_lateRG2	10XE25	F_earlyRG
E25_GAACCTACACGAGAGT-1	-300.451	F_IPC2	10XE25	F_earlyRG
E25_GAACCTATCCAAAGTC-1	-171.125	F_IPC2	10XE25	F_earlyRG
E25_GAACCTATCGTCTGCT-1	-270.512	F_IPC2	10XE25	F_earlyRG
E25_GAACGGAAGTCGTTTG-1	-212.174	F_IPC3	10XE25	F_earlyRG
E25_GAACGGAAGTTGTCGT-1	-143.795	F_IPC3	10XE25	F_earlyRG
E25_GAACGGACACAGCCCA-1	-174.151	F_IPC2	10XE25	F_earlyRG
E25_GAACGGACACCCAGTG-1	-244.017	F_lateRG2	10XE25	F_earlyRG
E25_GAACGGAGTACGCTGC-1	-195.252	F_IPC2	10XE25	F_earlyRG
E25_GAACGGAGTACTTGAC-1	-314.705	F_IPC3	10XE25	F_earlyRG
E25_GAACGGAGTCTACCTC-1	-189.842	F_IPC2	10XE25	F_earlyRG
E25_GAACGGAGTGCCTTGG-1	-197.393	F_lateRG2	10XE25	F_earlyRG
E25_GAACGGAGTTTGTGTG-1	-210.194	F_IPC2	10XE25	F_earlyRG
E25_GAAGCAGAGAGGGATA-1	-300.988	F_lateRG2	10XE25	F_earlyRG
E25_GAAGCAGAGTGGAGTC-1	-338.781	F_lateRG2	10XE25	F_earlyRG
E25_GAAGCAGCAATGAATG-1	-253.184	F_IPC3	10XE25	F_earlyRG
E25_GAAGCAGGTCGCATAT-1	-349.297	F_lateRG2	10XE25	F_earlyRG
E25_GAAGCAGTCCACTCCA-1	-257.953	F_lateRG2	10XE25	F_earlyRG
E25_GAAGCAGTCGCTAGCG-1	-270.977	F_lateRG2	10XE25	F_earlyRG
E25_GAAGCAGTCTCGCATC-1	-251.674	F_lateRG2	10XE25	F_earlyRG
E25_GAATAAGAGCCCTAAT-1	-225.25	F_lateRG2	10XE25	F_earlyRG
E25_GAATAAGCACAGACTT-1	-238.743	F_lateRG2	10XE25	F_earlyRG
E25_GAATAAGGTTTAAGCC-1	-181.243	F_lateRG2	10XE25	F_earlyRG
E25_GAATAAGTCCCGGATG-1	-138.231	F_IPC3	10XE25	F_earlyRG
E25_GAATGAAAGGGTGTTG-1	-263.707	F_lateRG2	10XE25	F_earlyRG
E25_GAATGAACACAGACTT-1	-144.928	F_IPC2	10XE25	F_earlyRG
E25_GAATGAACATCAGTCA-1	-264.388	F_lateRG2	10XE25	F_earlyRG
E25_GAATGAAGTGAGGGAG-1	-153.742	F_IPC3	10XE25	F_earlyRG
E25_GAATGAAGTGTATGGG-1	-201.212	F_lateRG2	10XE25	F_earlyRG
E25_GAATGAATCTTTCCTC-1	-221.681	F_lateRG2	10XE25	F_earlyRG
E25_GACACGCAGAATAGGG-1	-292.67	F_earlyRG3	10XE25	F_IPC
E25_GACACGCCATGCGCAC-1	-222.331	F_lateRG2	10XE25	F_earlyRG
E25_GACACGCGTCTACCTC-1	-221.23	F_lateRG2	10XE25	F_earlyRG
E25_GACACGCGTCTTCTCG-1	-238.571	F_lateRG2	10XE25	F_earlyRG
E25_GACACGCGTGGGTATG-1	-260.413	F_lateRG2	10XE25	F_earlyRG
E25_GACACGCGTGTAATGA-1	-243.852	F_lateRG2	10XE25	F_earlyRG
E25_GACACGCGTTCGTGAT-1	-215.586	F_IPC2	10XE25	F_earlyRG
E25_GACAGAGCAGTCAGAG-1	-183.692	F_IPC2	10XE25	F_earlyRG
E25_GACAGAGTCAACGAAA-1	-267.597	F_lateRG2	10XE25	F_earlyRG
E25_GACAGAGTCGGAGGTA-1	-265.245	F_IPC2	10XE25	F_earlyRG
E25_GACAGAGTCTGCTGCT-1	-213.661	F_lateRG2	10XE25	F_earlyRG
E25_GACCAATAGCGGCTTC-1	-177.446	F_IPC3	10XE25	F_earlyRG
E25_GACCAATCACTTCTGC-1	-205.811	F_IPC3	10XE25	F_earlyRG
E25_GACCAATGTAGCACGA-1	-263.474	F_lateRG2	10XE25	F_earlyRG
E25_GACCTGGCAGACGCTC-1	-206.094	F_IPC2	10XE25	F_earlyRG
E25_GACCTGGCAGTTTACG-1	-253.143	F_lateRG2	10XE25	F_earlyRG
E25_GACCTGGCATGGTCAT-1	-220.768	F_lateRG2	10XE25	F_earlyRG
E25_GACGCGTCACGGACAA-1	-205.763	F_lateRG2	10XE25	F_earlyRG
E25_GACGCGTCAGACAAAT-1	-218.751	F_IPC2	10XE25	F_earlyRG
E25_GACGCGTCATTCACTT-1	-243.881	F_lateRG2	10XE25	F_earlyRG
E25_GACGCGTTCTGGTATG-1	-341.001	F_lateRG2	10XE25	F_earlyRG
E25_GACGCGTTCTTAACCT-1	-327.681	F_lateRG2	10XE25	F_earlyRG
E25_GACGGCTCAATAGAGT-1	-207.747	F_lateRG2	10XE25	F_earlyRG
E25_GACGGCTCATCGTCGG-1	-163.764	F_IPC3	10XE25	F_earlyRG
E25_GACGGCTCATCTCGCT-1	-182.18	F_IPC2	10XE25	F_earlyRG
E25_GACGGCTGTCAAAGAT-1	-268.967	F_lateRG2	10XE25	F_earlyRG
E25_GACGGCTTCATCATTC-1	-220.98	F_lateRG2	10XE25	F_earlyRG
E25_GACGGCTTCGCGCCAA-1	-262.304	F_IPC3	10XE25	F_earlyRG
E25_GACGGCTTCGTGGTCG-1	-325.349	F_earlyRG3	10XE25	F_IPC
E25_GACGGCTTCTATGTGG-1	-251.344	F_lateRG2	10XE25	F_earlyRG
E25_GACGTGCAGGCCGAAT-1	-200.463	F_lateRG2	10XE25	F_earlyRG
E25_GACGTGCCAAACTGTC-1	-254.553	F_IPC2	10XE25	F_earlyRG
E25_GACGTGCGTAAGTTCC-1	-216.604	F_lateRG2	10XE25	F_earlyRG
E25_GACGTGCTCAACACAC-1	-197.364	F_IPC3	10XE25	F_earlyRG
E25_GACGTGCTCGTTACAG-1	-201.997	F_IPC3	10XE25	F_earlyRG
E25_GACGTTAAGAGCTTCT-1	-262.549	F_lateRG2	10XE25	F_earlyRG
E25_GACGTTAAGTTCGCAT-1	-160.503	F_IPC2	10XE25	F_earlyRG
E25_GACGTTACACAGGAGT-1	-235.364	F_lateRG2	10XE25	F_earlyRG
E25_GACGTTAGTCGAGTTT-1	-244.477	F_lateRG2	10XE25	F_earlyRG
E25_GACGTTATCCAGTATG-1	-228.841	F_IPC2	10XE25	F_earlyRG
E25_GACGTTATCCCATTTA-1	-257.124	F_IPC2	10XE25	F_earlyRG
E25_GACTAACCAATGGAAT-1	-243.73	F_lateRG2	10XE25	F_earlyRG
E25_GACTAACTCGGCTTGG-1	-219.144	F_lateRG2	10XE25	F_earlyRG
E25_GACTACACAGGGTATG-1	-245.926	F_IPC2	10XE25	F_earlyRG
E25_GACTACACATCGACGC-1	-268.689	F_lateRG2	10XE25	F_earlyRG
E25_GACTGCGAGTGTCTCA-1	-219.243	F_IPC3	10XE25	F_earlyRG
E25_GACTGCGAGTTCGATC-1	-255.535	F_lateRG2	10XE25	F_earlyRG
E25_GACTGCGCACCTGGTG-1	-189.035	F_IPC3	10XE25	F_earlyRG
E25_GACTGCGCAGAGCCAA-1	-241.375	F_lateRG2	10XE25	F_earlyRG
E25_GACTGCGTCATGTCTT-1	-228.97	F_IPC3	10XE25	F_earlyRG
E25_GACTGCGTCGCGATCG-1	-154.934	F_lateRG2	10XE25	F_earlyRG
E25_GAGCAGAAGGCTAGAC-1	-273.674	F_IPC2	10XE25	F_earlyRG
E25_GAGCAGAAGGGAAACA-1	-157.583	F_IPC3	10XE25	F_earlyRG
E25_GAGCAGAAGTGGAGAA-1	-295.143	F_lateRG2	10XE25	F_earlyRG
E25_GAGGTGACAAGTTGTC-1	-170.17	F_IPC2	10XE25	F_earlyRG
E25_GAGGTGACATGGGAAC-1	-296.354	F_lateRG2	10XE25	F_earlyRG
E25_GAGGTGAGTACCATCA-1	-206.494	F_IPC2	10XE25	F_earlyRG
E25_GAGGTGAGTATAAACG-1	-151.244	F_lateRG2	10XE25	F_earlyRG
E25_GAGGTGAGTGAGGGTT-1	-217.828	F_IPC3	10XE25	F_earlyRG
E25_GAGGTGATCCGCGGTA-1	-188.462	F_IPC2	10XE25	F_earlyRG
E25_GAGTCCGAGATATGCA-1	-318.174	F_IPC1	10XE25	F_IPC
E25_GAGTCCGGTCAATGTC-1	-205.809	F_lateRG2	10XE25	F_earlyRG
E25_GAGTCCGGTGACAAAT-1	-201.898	F_IPC2	10XE25	F_earlyRG
E25_GAGTCCGGTTCGTGAT-1	-245.866	F_lateRG2	10XE25	F_earlyRG
E25_GAGTCCGTCTTTAGGG-1	-226.961	F_lateRG2	10XE25	F_earlyRG
E25_GATCAGTAGTCGTACT-1	-213.045	F_IPC2	10XE25	F_earlyRG
E25_GATCAGTAGTTCCACA-1	-262.214	F_lateRG2	10XE25	F_earlyRG
E25_GATCAGTCAGGTCTCG-1	-244.297	F_IPC2	10XE25	F_earlyRG
E25_GATCAGTGTACAAGTA-1	-176.314	F_IPC2	10XE25	F_earlyRG
E25_GATCAGTGTCTGGTCG-1	-209.408	F_lateRG2	10XE25	F_earlyRG
E25_GATCAGTGTGCTGTAT-1	-265.715	F_IPC3	10XE25	F_earlyRG
E25_GATCGATAGGACTGGT-1	-231.197	F_lateRG2	10XE25	F_earlyRG
E25_GATCGATCATTGGGCC-1	-224.294	F_IPC3	10XE25	F_earlyRG
E25_GATCGATGTAACGACG-1	-186.296	F_lateRG2	10XE25	F_earlyRG
E25_GATCGATGTACTTGAC-1	-203.521	F_IPC3	10XE25	F_earlyRG
E25_GATCGATTCAGCATGT-1	-167.708	F_lateRG2	10XE25	F_earlyRG
E25_GATCGATTCTCACATT-1	-136.968	F_IPC2	10XE25	F_earlyRG
E25_GATCGCGTCTCGCTTG-1	-247.363	F_lateRG2	10XE25	F_earlyRG
E25_GATCGTAAGCGATATA-1	-181.315	F_lateRG2	10XE25	F_earlyRG
E25_GATCGTAAGTATGACA-1	-189.365	F_lateRG2	10XE25	F_earlyRG
E25_GATCGTACACGCGAAA-1	-196.237	F_IPC2	10XE25	F_earlyRG
E25_GATCGTAGTATATGGA-1	-216.214	F_IPC2	10XE25	F_earlyRG
E25_GATCGTAGTGTAATGA-1	-237.612	F_IPC2	10XE25	F_earlyRG
E25_GATCGTATCTTACCGC-1	-254.673	F_lateRG2	10XE25	F_earlyRG
E25_GATCTAGGTCATATCG-1	-197.05	F_IPC3	10XE25	F_earlyRG
E25_GATCTAGTCCAAAGTC-1	-239.844	F_IPC2	10XE25	F_earlyRG
E25_GATGAAAGTCGCTTTC-1	-262.117	F_IPC2	10XE25	F_earlyRG
E25_GATGAAAGTGCTAGCC-1	-323.287	F_lateRG2	10XE25	F_earlyRG
E25_GATGAGGAGGAGTTTA-1	-231.167	F_IPC3	10XE25	F_earlyRG
E25_GATGAGGAGTCGCCGT-1	-153.419	F_IPC2	10XE25	F_earlyRG
E25_GATGAGGCAATGTAAG-1	-171.724	F_IPC2	10XE25	F_earlyRG
E25_GATGAGGCAGCCAATT-1	-220.101	F_IPC2	10XE25	F_earlyRG
E25_GATGAGGGTGCGAAAC-1	-205.105	F_IPC2	10XE25	F_earlyRG
E25_GATGAGGGTGTGCGTC-1	-205.12	F_lateRG2	10XE25	F_earlyRG
E25_GATGAGGGTTGTACAC-1	-248.798	F_IPC3	10XE25	F_earlyRG
E25_GATGCTACACTTGGAT-1	-158.152	F_IPC3	10XE25	F_earlyRG
E25_GATGCTAGTGTGGCTC-1	-225.252	F_IPC2	10XE25	F_earlyRG
E25_GATGCTAGTTTGTGTG-1	-192.534	F_IPC2	10XE25	F_earlyRG
E25_GATGCTATCCATGAAC-1	-156.588	F_IPC2	10XE25	F_earlyRG
E25_GATTCAGAGACCTTTG-1	-165.706	F_IPC3	10XE25	F_earlyRG
E25_GATTCAGCAGATGGCA-1	-219.186	F_IPC2	10XE25	F_earlyRG
E25_GATTCAGCAGTAAGCG-1	-262.267	F_lateRG2	10XE25	F_earlyRG
E25_GATTCAGGTAAACCTC-1	-202.504	F_IPC3	10XE25	F_earlyRG
E25_GATTCAGTCCTGCCAT-1	-258.714	F_lateRG2	10XE25	F_earlyRG
E25_GATTCAGTCGGCATCG-1	-254.404	F_lateRG2	10XE25	F_earlyRG
E25_GCAAACTCATTGTGCA-1	-206.043	F_IPC2	10XE25	F_earlyRG
E25_GCAAACTGTACGACCC-1	-264.499	F_lateRG2	10XE25	F_earlyRG
E25_GCAATCAAGTAGCCGA-1	-239.296	F_IPC2	10XE25	F_earlyRG
E25_GCAATCAGTAGCCTAT-1	-325.959	F_IPC3	10XE25	F_earlyRG
E25_GCACATAAGGATTCGG-1	-231.144	F_IPC2	10XE25	F_earlyRG
E25_GCACATAAGGCCCTCA-1	-230.9	F_lateRG2	10XE25	F_earlyRG
E25_GCACATAAGGCTAGAC-1	-179.776	F_IPC3	10XE25	F_earlyRG
E25_GCACATAGTAAGGGCT-1	-196.799	F_IPC2	10XE25	F_earlyRG
E25_GCACATATCTGGCGTG-1	-165.822	F_IPC2	10XE25	F_earlyRG
E25_GCACTCTAGTCCGTAT-1	-297.016	F_lateRG2	10XE25	F_earlyRG
E25_GCACTCTGTACAGCAG-1	-151.826	F_IPC2	10XE25	F_earlyRG
E25_GCACTCTTCCGCTGTT-1	-199.727	F_lateRG2	10XE25	F_earlyRG
E25_GCACTCTTCTTATCTG-1	-233.6	F_IPC3	10XE25	F_earlyRG
E25_GCAGCCACACGAAAGC-1	-192.585	F_lateRG2	10XE25	F_earlyRG
E25_GCAGCCACATCCTAGA-1	-237.182	F_IPC3	10XE25	F_earlyRG
E25_GCAGCCACATGTCCTC-1	-203.218	F_lateRG2	10XE25	F_earlyRG
E25_GCAGCCACATTGAGCT-1	-166.295	F_IPC2	10XE25	F_earlyRG
E25_GCAGCCAGTGCACGAA-1	-141.559	F_IPC3	10XE25	F_earlyRG
E25_GCAGTTAAGTACACCT-1	-220.92	F_lateRG2	10XE25	F_earlyRG
E25_GCAGTTACAGGATCGA-1	-268.662	F_lateRG2	10XE25	F_earlyRG
E25_GCAGTTAGTCTCGTTC-1	-181.311	F_IPC2	10XE25	F_earlyRG
E25_GCAGTTAGTGGTCTCG-1	-254.826	F_IPC3	10XE25	F_earlyRG
E25_GCAGTTATCACAAACC-1	-223.339	F_IPC2	10XE25	F_earlyRG
E25_GCATACAAGCAATATG-1	-318.724	F_lateRG2	10XE25	F_earlyRG
E25_GCATACAAGCCAGAAC-1	-256.937	F_lateRG2	10XE25	F_earlyRG
E25_GCATACAAGTACCGGA-1	-267.319	F_lateRG2	10XE25	F_earlyRG
E25_GCATACACAATCAGAA-1	-296.515	F_lateRG2	10XE25	F_earlyRG
E25_GCATACAGTCGAACAG-1	-226.848	F_lateRG2	10XE25	F_earlyRG
E25_GCATGATCAGGCTGAA-1	-187.428	F_IPC2	10XE25	F_earlyRG
E25_GCATGCGAGTCCCACG-1	-247.038	F_IPC3	10XE25	F_earlyRG
E25_GCATGCGTCAGCCTAA-1	-222.462	F_lateRG2	10XE25	F_earlyRG
E25_GCATGCGTCTGAAAGA-1	-223.814	F_lateRG2	10XE25	F_earlyRG
E25_GCATGTAAGAGCAATT-1	-248.078	F_lateRG2	10XE25	F_earlyRG
E25_GCATGTAAGGCATGTG-1	-198.852	F_IPC2	10XE25	F_earlyRG
E25_GCATGTACAAGACACG-1	-199.935	F_IPC2	10XE25	F_earlyRG
E25_GCATGTAGTTCTGAAC-1	-230.086	F_IPC2	10XE25	F_earlyRG
E25_GCATGTATCCTACAGA-1	-152.397	F_lateRG2	10XE25	F_earlyRG
E25_GCCAAATCAACTTGAC-1	-213.095	F_lateRG2	10XE25	F_earlyRG
E25_GCCAAATGTAGCCTAT-1	-239.734	F_lateRG2	10XE25	F_earlyRG
E25_GCCAAATGTCCGAAGA-1	-238.651	F_IPC2	10XE25	F_earlyRG
E25_GCCAAATTCGTACCGG-1	-170.989	F_lateRG2	10XE25	F_earlyRG
E25_GCCAAATTCTGTTGAG-1	-157.31	F_IPC2	10XE25	F_earlyRG
E25_GCCTCTAAGTTCGCGC-1	-195.077	F_lateRG2	10XE25	F_earlyRG
E25_GCCTCTAGTAAAGGAG-1	-245.06	F_IPC2	10XE25	F_earlyRG
E25_GCCTCTAGTCTAGGTT-1	-134.909	F_IPC2	10XE25	F_earlyRG
E25_GCGACCACAACTGCGC-1	-224.199	F_IPC2	10XE25	F_earlyRG
E25_GCGACCACACGACTCG-1	-203.92	F_lateRG2	10XE25	F_earlyRG
E25_GCGACCAGTGGTTTCA-1	-219.829	F_lateRG2	10XE25	F_earlyRG
E25_GCGACCATCCTTCAAT-1	-174.011	F_lateRG2	10XE25	F_earlyRG
E25_GCGACCATCGATGAGG-1	-229.047	F_IPC3	10XE25	F_earlyRG
E25_GCGAGAACATGAGCGA-1	-232.258	F_IPC3	10XE25	F_earlyRG
E25_GCGAGAACATTACGAC-1	-186.725	F_lateRG2	10XE25	F_earlyRG
E25_GCGAGAAGTAGGCTGA-1	-211.742	F_IPC2	10XE25	F_earlyRG
E25_GCGAGAATCTCTGTCG-1	-237.292	F_lateRG2	10XE25	F_earlyRG
E25_GCGAGAATCTGTTGAG-1	-189.73	F_lateRG2	10XE25	F_earlyRG
E25_GCGCAACGTAAATGAC-1	-306.304	F_lateRG2	10XE25	F_earlyRG
E25_GCGCAACTCCTGTACC-1	-173.187	F_lateRG2	10XE25	F_earlyRG
E25_GCGCAACTCGTAGGAG-1	-217.531	F_IPC2	10XE25	F_earlyRG
E25_GCGCAGTAGATGTCGG-1	-204.437	F_lateRG2	10XE25	F_earlyRG
E25_GCGCAGTAGTCTTGCA-1	-135.961	F_IPC2	10XE25	F_earlyRG
E25_GCGCAGTGTAGCAAAT-1	-285.614	F_lateRG2	10XE25	F_earlyRG
E25_GCGCAGTGTTCGAATC-1	-283.758	F_lateRG2	10XE25	F_earlyRG
E25_GCGCAGTTCGGAGGTA-1	-325.008	F_lateRG2	10XE25	F_earlyRG
E25_GCGCAGTTCTCGTTTA-1	-246.965	F_IPC2	10XE25	F_earlyRG
E25_GCGCCAACAAGAAGAG-1	-191.885	F_lateRG2	10XE25	F_earlyRG
E25_GCGCCAAGTTACGCGC-1	-212.904	F_lateRG2	10XE25	F_earlyRG
E25_GCGCCAATCCAGAAGG-1	-200.833	F_lateRG2	10XE25	F_earlyRG
E25_GCGCCAATCGAACTGT-1	-175.006	F_IPC3	10XE25	F_earlyRG
E25_GCGCGATAGCCCTAAT-1	-183.47	F_IPC3	10XE25	F_earlyRG
E25_GCGCGATCAATGTTGC-1	-301.73	F_lateRG2	10XE25	F_earlyRG
E25_GCGCGATCACAAGCCC-1	-226.682	F_lateRG2	10XE25	F_earlyRG
E25_GCGCGATCATACGCCG-1	-249.199	F_IPC2	10XE25	F_earlyRG
E25_GCGCGATGTGCCTGGT-1	-251.325	F_lateRG2	10XE25	F_earlyRG
E25_GCGCGATTCGCGGATC-1	-121.72	F_IPC2	10XE25	F_earlyRG
E25_GCGGGTTAGAACTCGG-1	-252.174	F_lateRG2	10XE25	F_earlyRG
E25_GCGGGTTAGCAGCCTC-1	-252.938	F_lateRG2	10XE25	F_earlyRG
E25_GCGGGTTAGCTGTTCA-1	-157.032	F_IPC2	10XE25	F_earlyRG
E25_GCGGGTTCAACACCTA-1	-334.869	F_earlyRG3	10XE25	F_IPC
E25_GCGGGTTCACTGCCAG-1	-419.587	F_earlyRG2	10XE25	F_IPC
E25_GCGGGTTCATTAACCG-1	-139.892	F_IPC2	10XE25	F_earlyRG
E25_GCGGGTTTCACAGTAC-1	-354.765	F_IPC1	10XE25	F_IPC
E25_GCGGGTTTCGATAGAA-1	-302.924	F_lateRG2	10XE25	F_earlyRG
E25_GCGGGTTTCGGCGGTT-1	-153.809	F_IPC2	10XE25	F_earlyRG
E25_GCTCCTAAGAGTCGGT-1	-142.89	F_lateRG2	10XE25	F_earlyRG
E25_GCTCCTAAGCTGAAAT-1	-181.765	F_IPC2	10XE25	F_earlyRG
E25_GCTCCTACAACGCACC-1	-251.266	F_lateRG2	10XE25	F_earlyRG
E25_GCTCCTAGTTAAGATG-1	-204.948	F_IPC2	10XE25	F_earlyRG
E25_GCTCTGTAGATGGCGT-1	-199.714	F_lateRG2	10XE25	F_earlyRG
E25_GCTCTGTAGGATGCGT-1	-182.613	F_IPC3	10XE25	F_earlyRG
E25_GCTCTGTCACATTCGA-1	-266.522	F_IPC3	10XE25	F_earlyRG
E25_GCTCTGTCACCAGATT-1	-265.527	F_lateRG2	10XE25	F_earlyRG
E25_GCTCTGTCAGGCTGAA-1	-200.245	F_IPC2	10XE25	F_earlyRG
E25_GCTCTGTGTAAGGGAA-1	-254.734	F_lateRG2	10XE25	F_earlyRG
E25_GCTCTGTGTGCCTTGG-1	-189.628	F_lateRG2	10XE25	F_earlyRG
E25_GCTCTGTTCGCATGGC-1	-168.069	F_IPC2	10XE25	F_earlyRG
E25_GCTCTGTTCTAGAGTC-1	-170.978	F_IPC2	10XE25	F_earlyRG
E25_GCTGCAGAGAAACCGC-1	-214.153	F_IPC2	10XE25	F_earlyRG
E25_GCTGCAGAGGCACATG-1	-198.514	F_lateRG2	10XE25	F_earlyRG
E25_GCTGCAGCAGCGTCCA-1	-260.469	F_IPC3	10XE25	F_earlyRG
E25_GCTGCAGCATCCAACA-1	-265.597	F_lateRG2	10XE25	F_earlyRG
E25_GCTGCAGGTCCAAGTT-1	-302.653	F_earlyRG3	10XE25	F_IPC
E25_GCTGCAGGTTGGTAAA-1	-269.806	F_lateRG2	10XE25	F_earlyRG
E25_GCTGCAGTCTGAGGGA-1	-205.156	F_lateRG2	10XE25	F_earlyRG
E25_GCTGCGACAGTATCTG-1	-313.075	F_earlyRG3	10XE25	F_IPC
E25_GCTGCGAGTAAATACG-1	-208.891	F_lateRG2	10XE25	F_earlyRG
E25_GCTGCGATCTAACTGG-1	-249.018	F_lateRG2	10XE25	F_earlyRG
E25_GCTGCGATCTTGAGAC-1	-223.678	F_lateRG2	10XE25	F_earlyRG
E25_GCTGCTTGTGATAAAC-1	-250.384	F_IPC2	10XE25	F_earlyRG
E25_GCTGCTTGTTTGACAC-1	-239.48	F_IPC2	10XE25	F_earlyRG
E25_GCTGCTTTCCTGTAGA-1	-224.92	F_lateRG2	10XE25	F_earlyRG
E25_GCTGGGTGTACATGTC-1	-192.951	F_IPC3	10XE25	F_earlyRG
E25_GCTGGGTTCTTTACGT-1	-326.21	F_lateRG2	10XE25	F_earlyRG
E25_GCTTCCAAGAGGGCTT-1	-261.751	F_IPC2	10XE25	F_earlyRG
E25_GCTTCCAAGATATACG-1	-207.265	F_IPC2	10XE25	F_earlyRG
E25_GCTTCCAAGCCGATTT-1	-196.704	F_lateRG2	10XE25	F_earlyRG
E25_GCTTCCAAGTAGGCCA-1	-181.604	F_IPC3	10XE25	F_earlyRG
E25_GCTTCCAAGTTCGCGC-1	-231.063	F_lateRG2	10XE25	F_earlyRG
E25_GCTTCCACAAGACACG-1	-194.161	F_IPC3	10XE25	F_earlyRG
E25_GCTTCCATCCTCGCAT-1	-183.865	F_IPC2	10XE25	F_earlyRG
E25_GCTTCCATCGCCAGCA-1	-161.815	F_lateRG2	10XE25	F_earlyRG
E25_GCTTGAACACCCAGTG-1	-232.102	F_IPC2	10XE25	F_earlyRG
E25_GCTTGAACATGTTCCC-1	-246.293	F_lateRG2	10XE25	F_earlyRG
E25_GCTTGAAGTACCTACA-1	-249.05	F_lateRG2	10XE25	F_earlyRG
E25_GGAAAGCAGACGCTTT-1	-364.103	F_earlyRG3	10XE25	F_IPC
E25_GGAAAGCAGTTAACGA-1	-156.414	F_IPC3	10XE25	F_earlyRG
E25_GGAAAGCTCACAGTAC-1	-242.894	F_lateRG2	10XE25	F_earlyRG
E25_GGAAAGCTCCAAACTG-1	-255.185	F_lateRG2	10XE25	F_earlyRG
E25_GGAACTTAGATCCTGT-1	-277.886	F_lateRG2	10XE25	F_earlyRG
E25_GGAACTTAGTGATCGG-1	-235.398	F_IPC3	10XE25	F_earlyRG
E25_GGAACTTGTACCCAAT-1	-329.561	F_IPC2	10XE25	F_earlyRG
E25_GGAACTTGTCTTTCAT-1	-221.307	F_IPC2	10XE25	F_earlyRG
E25_GGAACTTTCGTGACAT-1	-292.611	F_lateRG2	10XE25	F_earlyRG
E25_GGAATAAAGAGTACAT-1	-279.285	F_IPC2	10XE25	F_earlyRG
E25_GGAATAATCACAGGCC-1	-271.757	F_lateRG2	10XE25	F_earlyRG
E25_GGAATAATCGGTTCGG-1	-262.794	F_lateRG2	10XE25	F_earlyRG
E25_GGACAAGAGACACTAA-1	-242.676	F_lateRG2	10XE25	F_earlyRG
E25_GGACAAGAGCTAGGCA-1	-215.744	F_lateRG2	10XE25	F_earlyRG
E25_GGACAAGCAGCTGGCT-1	-242.185	F_lateRG2	10XE25	F_earlyRG
E25_GGACAAGCATCTACGA-1	-197.751	F_IPC2	10XE25	F_earlyRG
E25_GGACAAGGTTCCAACA-1	-213.023	F_IPC2	10XE25	F_earlyRG
E25_GGACAAGTCAGCAACT-1	-170.694	F_IPC3	10XE25	F_earlyRG
E25_GGACAAGTCCTTGACC-1	-230.759	F_lateRG2	10XE25	F_earlyRG
E25_GGACAGAAGCCGATTT-1	-193.488	F_lateRG2	10XE25	F_earlyRG
E25_GGACAGAAGTCAATAG-1	-129.908	F_IPC2	10XE25	F_earlyRG
E25_GGACAGAAGTGCAAGC-1	-176.121	F_lateRG2	10XE25	F_earlyRG
E25_GGACAGACACTGTCGG-1	-319.096	F_lateRG2	10XE25	F_earlyRG
E25_GGACAGACAGTAAGCG-1	-171.576	F_IPC3	10XE25	F_earlyRG
E25_GGACAGAGTAGGACAC-1	-220.14	F_IPC3	10XE25	F_earlyRG
E25_GGACATTCAGGTGGAT-1	-93.9469	F_IPC2	10XE25	F_earlyRG
E25_GGACATTGTCCGAGTC-1	-281.724	F_lateRG2	10XE25	F_earlyRG
E25_GGACATTGTGACAAAT-1	-237.512	F_lateRG2	10XE25	F_earlyRG
E25_GGACATTTCGGTCTAA-1	-301.271	F_earlyRG3	10XE25	F_IPC
E25_GGACATTTCGTCTGAA-1	-248.142	F_lateRG2	10XE25	F_earlyRG
E25_GGACGTCCAATCCAAC-1	-254.938	F_IPC2	10XE25	F_earlyRG
E25_GGACGTCGTGCAGGTA-1	-318.187	F_lateRG2	10XE25	F_earlyRG
E25_GGACGTCGTGCTGTAT-1	-301.765	F_lateRG2	10XE25	F_earlyRG
E25_GGACGTCGTTCAACCA-1	-219.471	F_lateRG2	10XE25	F_earlyRG
E25_GGACGTCTCAGAGGTG-1	-231.289	F_lateRG2	10XE25	F_earlyRG
E25_GGAGCAACAAGGACAC-1	-200.149	F_lateRG2	10XE25	F_earlyRG
E25_GGAGCAACACCAGGCT-1	-273.189	F_IPC3	10XE25	F_earlyRG
E25_GGAGCAAGTTCATGGT-1	-279.444	F_earlyRG3	10XE25	F_IPC
E25_GGAGCAATCAGAGACG-1	-273.121	F_lateRG2	10XE25	F_earlyRG
E25_GGAGCAATCAGAGGTG-1	-195.335	F_IPC2	10XE25	F_earlyRG
E25_GGAGCAATCTGTTGAG-1	-203.068	F_lateRG2	10XE25	F_earlyRG
E25_GGATGTTAGTCGATAA-1	-217.914	F_lateRG2	10XE25	F_earlyRG
E25_GGATGTTAGTGCAAGC-1	-265.058	F_IPC2	10XE25	F_earlyRG
E25_GGATGTTAGTGTGAAT-1	-409.053	F_IPC1	10XE25	F_IPC
E25_GGATGTTCAATTCCTT-1	-232.241	F_IPC3	10XE25	F_earlyRG
E25_GGATGTTCACATGACT-1	-239.857	F_lateRG2	10XE25	F_earlyRG
E25_GGATGTTCAGATGGCA-1	-227.385	F_IPC2	10XE25	F_earlyRG
E25_GGATTACCAAGTCATC-1	-220.648	F_IPC2	10XE25	F_earlyRG
E25_GGATTACTCGTAGGAG-1	-255.644	F_lateRG2	10XE25	F_earlyRG
E25_GGCAATTAGGAATTAC-1	-355.051	F_IPC1	10XE25	F_IPC
E25_GGCAATTCAATGGATA-1	-216.52	F_lateRG2	10XE25	F_earlyRG
E25_GGCAATTCATCGTCGG-1	-197.697	F_IPC2	10XE25	F_earlyRG
E25_GGCAATTGTCTTCGTC-1	-241.303	F_lateRG2	10XE25	F_earlyRG
E25_GGCAATTGTGCAGACA-1	-320.138	F_earlyRG3	10XE25	F_IPC
E25_GGCCGATAGCTAGTTC-1	-266.6	F_IPC2	10XE25	F_earlyRG
E25_GGCCGATGTCTGCAAT-1	-225.293	F_lateRG2	10XE25	F_earlyRG
E25_GGCCGATGTTCCGTCT-1	-186.316	F_lateRG2	10XE25	F_earlyRG
E25_GGCCGATTCCTAAGTG-1	-213.553	F_lateRG2	10XE25	F_earlyRG
E25_GGCGACTAGTTGCAGG-1	-194.188	F_IPC2	10XE25	F_earlyRG
E25_GGCGACTGTCGTTGTA-1	-228.001	F_lateRG2	10XE25	F_earlyRG
E25_GGCGTGTAGCGATTCT-1	-261.332	F_IPC2	10XE25	F_earlyRG
E25_GGCGTGTAGGGTGTGT-1	-342.188	F_lateRG2	10XE25	F_earlyRG
E25_GGCGTGTGTGAAATCA-1	-281.953	F_lateRG2	10XE25	F_earlyRG
E25_GGCGTGTTCGTAGGAG-1	-211.988	F_IPC3	10XE25	F_earlyRG
E25_GGCGTGTTCTTACCTA-1	-207.843	F_lateRG2	10XE25	F_earlyRG
E25_GGCTCGAAGAGGTTGC-1	-258.839	F_lateRG2	10XE25	F_earlyRG
E25_GGCTCGAAGCCAGTTT-1	-272.228	F_IPC2	10XE25	F_earlyRG
E25_GGCTCGAAGGATGGTC-1	-231.872	F_IPC2	10XE25	F_earlyRG
E25_GGCTCGAAGGCTCTTA-1	-236.312	F_lateRG2	10XE25	F_earlyRG
E25_GGCTCGAGTGATGTGG-1	-263.655	F_lateRG2	10XE25	F_earlyRG
E25_GGCTCGAGTTCACGGC-1	-168.763	F_lateRG2	10XE25	F_earlyRG
E25_GGCTCGATCGTCCGTT-1	-213.124	F_lateRG2	10XE25	F_earlyRG
E25_GGCTGGTGTCGGCACT-1	-185.079	F_IPC2	10XE25	F_earlyRG
E25_GGCTGGTGTTGTGGCC-1	-251.108	F_lateRG2	10XE25	F_earlyRG
E25_GGCTGGTTCGGTTCGG-1	-185.154	F_lateRG2	10XE25	F_earlyRG
E25_GGGAATGAGGGTTCCC-1	-168.583	F_IPC2	10XE25	F_earlyRG
E25_GGGAATGCACGACGAA-1	-226.796	F_lateRG2	10XE25	F_earlyRG
E25_GGGAATGCATTCTCAT-1	-198.312	F_lateRG2	10XE25	F_earlyRG
E25_GGGAATGGTAGTACCT-1	-240.56	F_IPC3	10XE25	F_earlyRG
E25_GGGAATGTCATGTAGC-1	-254.976	F_IPC3	10XE25	F_earlyRG
E25_GGGACCTAGCAATATG-1	-179.974	F_IPC3	10XE25	F_earlyRG
E25_GGGAGATAGTGGGCTA-1	-292.329	F_lateRG2	10XE25	F_earlyRG
E25_GGGAGATCAAATCCGT-1	-243.122	F_IPC2	10XE25	F_earlyRG
E25_GGGAGATGTTAAGTAG-1	-222.239	F_lateRG2	10XE25	F_earlyRG
E25_GGGATGAAGTCAATAG-1	-227.996	F_lateRG2	10XE25	F_earlyRG
E25_GGGATGAAGTGTACTC-1	-270.713	F_lateRG2	10XE25	F_earlyRG
E25_GGGATGACAGGAATCG-1	-220.1	F_IPC2	10XE25	F_earlyRG
E25_GGGATGAGTTCAGCGC-1	-294.332	F_IPC3	10XE25	F_earlyRG
E25_GGGATGATCGGACAAG-1	-180.234	F_IPC2	10XE25	F_earlyRG
E25_GGGCACTAGCGTCTAT-1	-170.459	F_IPC3	10XE25	F_earlyRG
E25_GGGCACTCACAGACAG-1	-281.408	F_lateRG2	10XE25	F_earlyRG
E25_GGGCACTCACGAAGCA-1	-144.821	F_IPC2	10XE25	F_earlyRG
E25_GGGCACTGTTGATTGC-1	-228.658	F_lateRG2	10XE25	F_earlyRG
E25_GGGCATCAGACTAGGC-1	-237.422	F_lateRG2	10XE25	F_earlyRG
E25_GGGCATCAGAGTCGGT-1	-331.78	F_lateRG2	10XE25	F_earlyRG
E25_GGGCATCCAGTGAGTG-1	-232.121	F_lateRG2	10XE25	F_earlyRG
E25_GGGCATCGTAATTGGA-1	-265.009	F_IPC3	10XE25	F_earlyRG
E25_GGGCATCGTAGTAGTA-1	-245.717	F_IPC2	10XE25	F_earlyRG
E25_GGGCATCGTTCACCTC-1	-335.907	F_lateRG2	10XE25	F_earlyRG
E25_GGGCATCTCAAAGTAG-1	-301.204	F_lateRG2	10XE25	F_earlyRG
E25_GGGCATCTCTGGTATG-1	-229.643	F_IPC2	10XE25	F_earlyRG
E25_GGGCATCTCTTTACAC-1	-182.474	F_lateRG2	10XE25	F_earlyRG
E25_GGGTCTGAGCATCATC-1	-217.716	F_IPC3	10XE25	F_earlyRG
E25_GGGTTGCAGATATGGT-1	-250.443	F_IPC2	10XE25	F_earlyRG
E25_GGGTTGCAGCTTTGGT-1	-256.483	F_IPC2	10XE25	F_earlyRG
E25_GGGTTGCAGTGTACTC-1	-203.544	F_IPC2	10XE25	F_earlyRG
E25_GGGTTGCCAGACTCGC-1	-135.213	F_IPC2	10XE25	F_earlyRG
E25_GGGTTGCGTAGAGTGC-1	-187.228	F_IPC3	10XE25	F_earlyRG
E25_GGGTTGCGTCCGAATT-1	-232.261	F_IPC2	10XE25	F_earlyRG
E25_GGGTTGCGTGACAAAT-1	-268.332	F_IPC3	10XE25	F_earlyRG
E25_GGTGAAGCACCCATGG-1	-322.254	F_IPC1	10XE25	F_IPC
E25_GGTGAAGCAGTTCCCT-1	-103.161	F_IPC3	10XE25	F_earlyRG
E25_GGTGAAGGTTAAGACA-1	-327.435	F_earlyRG3	10XE25	F_IPC
E25_GGTGCGTAGATCTGCT-1	-290.456	F_IPC1	10XE25	F_IPC
E25_GGTGCGTCACAGGTTT-1	-226.677	F_lateRG2	10XE25	F_earlyRG
E25_GGTGCGTGTAAACGCG-1	-279.373	F_lateRG2	10XE25	F_earlyRG
E25_GGTGCGTGTAGATTAG-1	-281.469	F_lateRG2	10XE25	F_earlyRG
E25_GGTGCGTGTTATGCGT-1	-225.301	F_lateRG2	10XE25	F_earlyRG
E25_GGTGCGTTCTCGTATT-1	-204.381	F_IPC2	10XE25	F_earlyRG
E25_GGTGTTAAGCCTCGTG-1	-222.119	F_IPC2	10XE25	F_earlyRG
E25_GGTGTTAAGCTAGGCA-1	-205.501	F_IPC3	10XE25	F_earlyRG
E25_GGTGTTAAGGTGTGGT-1	-203.703	F_IPC2	10XE25	F_earlyRG
E25_GGTGTTAAGTGTCTCA-1	-223.268	F_IPC2	10XE25	F_earlyRG
E25_GGTGTTACAGCTCCGA-1	-225.111	F_lateRG2	10XE25	F_earlyRG
E25_GGTGTTACATCGGGTC-1	-241.39	F_lateRG2	10XE25	F_earlyRG
E25_GGTGTTAGTAGCACGA-1	-232.647	F_IPC2	10XE25	F_earlyRG
E25_GGTGTTATCACAACGT-1	-234.37	F_IPC2	10XE25	F_earlyRG
E25_GTAACGTAGAAACCAT-1	-284.356	F_IPC3	10XE25	F_earlyRG
E25_GTAACGTAGCGATCCC-1	-243.697	F_IPC2	10XE25	F_earlyRG
E25_GTAACGTAGGCATGGT-1	-270.6	F_earlyRG3	10XE25	F_IPC
E25_GTAACGTTCAACACTG-1	-273.24	F_lateRG2	10XE25	F_earlyRG
E25_GTAACGTTCAATAAGG-1	-217.363	F_IPC3	10XE25	F_earlyRG
E25_GTAACGTTCCATGAGT-1	-381.994	F_lateRG2	10XE25	F_earlyRG
E25_GTAACGTTCTGCCCTA-1	-190.842	F_IPC2	10XE25	F_earlyRG
E25_GTAACTGAGCTACCGC-1	-161.298	F_lateRG2	10XE25	F_earlyRG
E25_GTAACTGGTCACCTAA-1	-289.09	F_lateRG2	10XE25	F_earlyRG
E25_GTAACTGGTCGCATCG-1	-210.009	F_lateRG2	10XE25	F_earlyRG
E25_GTAACTGGTCTCTTTA-1	-221.556	F_IPC2	10XE25	F_earlyRG
E25_GTAACTGGTTAGAACA-1	-212.541	F_lateRG2	10XE25	F_earlyRG
E25_GTAACTGTCCGAACGC-1	-242.759	F_IPC2	10XE25	F_earlyRG
E25_GTACGTAAGGGTCTCC-1	-185.909	F_lateRG2	10XE25	F_earlyRG
E25_GTACGTACAAGGTTTC-1	-157.72	F_IPC2	10XE25	F_earlyRG
E25_GTACGTACACGGATAG-1	-182.074	F_IPC2	10XE25	F_earlyRG
E25_GTACGTAGTACCTACA-1	-279.49	F_lateRG2	10XE25	F_earlyRG
E25_GTACGTAGTTGTTTGG-1	-157.572	F_IPC3	10XE25	F_earlyRG
E25_GTACGTATCACAATGC-1	-214.947	F_IPC2	10XE25	F_earlyRG
E25_GTACGTATCCGCGTTT-1	-339.437	F_lateRG2	10XE25	F_earlyRG
E25_GTACGTATCTACCAGA-1	-257.107	F_lateRG2	10XE25	F_earlyRG
E25_GTACTCCAGAGAGCTC-1	-196.864	F_lateRG2	10XE25	F_earlyRG
E25_GTACTCCAGCCCAATT-1	-194.146	F_IPC3	10XE25	F_earlyRG
E25_GTACTCCCACACCGAC-1	-223.55	F_IPC3	10XE25	F_earlyRG
E25_GTACTCCCAGTCGATT-1	-236.53	F_IPC3	10XE25	F_earlyRG
E25_GTACTCCCATTGAGCT-1	-249.23	F_lateRG2	10XE25	F_earlyRG
E25_GTACTCCTCAATACCG-1	-277.048	F_IPC3	10XE25	F_earlyRG
E25_GTACTCCTCGAATCCA-1	-412.746	F_lateRG2	10XE25	F_earlyRG
E25_GTACTTTAGCATGGCA-1	-206.71	F_IPC3	10XE25	F_earlyRG
E25_GTACTTTAGTGAAGAG-1	-219.635	F_lateRG2	10XE25	F_earlyRG
E25_GTACTTTGTAGGCTGA-1	-242.751	F_lateRG2	10XE25	F_earlyRG
E25_GTACTTTTCAATACCG-1	-179.15	F_lateRG2	10XE25	F_earlyRG
E25_GTAGGCCCACCGGAAA-1	-201.918	F_IPC2	10XE25	F_earlyRG
E25_GTAGGCCTCCAGAAGG-1	-251.599	F_lateRG2	10XE25	F_earlyRG
E25_GTAGTCACACCGTTGG-1	-249.178	F_lateRG2	10XE25	F_earlyRG
E25_GTAGTCACATAGGATA-1	-242.633	F_lateRG2	10XE25	F_earlyRG
E25_GTAGTCACATCGGTTA-1	-224.854	F_lateRG2	10XE25	F_earlyRG
E25_GTATCTTAGGTGGGTT-1	-183.384	F_IPC3	10XE25	F_earlyRG
E25_GTATCTTTCGGTTCGG-1	-207.227	F_IPC2	10XE25	F_earlyRG
E25_GTATTCTCATCGGAAG-1	-212.13	F_lateRG2	10XE25	F_earlyRG
E25_GTATTCTGTGTTAAGA-1	-313.656	F_lateRG2	10XE25	F_earlyRG
E25_GTATTCTGTTCTGTTT-1	-214.048	F_lateRG2	10XE25	F_earlyRG
E25_GTATTCTTCGCTTAGA-1	-201.124	F_IPC3	10XE25	F_earlyRG
E25_GTCAAGTAGGCCCTTG-1	-197.1	F_IPC3	10XE25	F_earlyRG
E25_GTCAAGTCACATTAGC-1	-160.041	F_IPC3	10XE25	F_earlyRG
E25_GTCAAGTGTAAGGATT-1	-174.327	F_IPC2	10XE25	F_earlyRG
E25_GTCAAGTGTCTGGTCG-1	-248.274	F_lateRG2	10XE25	F_earlyRG
E25_GTCAAGTGTTGGTTTG-1	-160.227	F_IPC3	10XE25	F_earlyRG
E25_GTCAAGTTCAAAGACA-1	-220.993	F_IPC2	10XE25	F_earlyRG
E25_GTCAAGTTCCTTGACC-1	-184.027	F_IPC2	10XE25	F_earlyRG
E25_GTCACAAAGAGTTGGC-1	-259.263	F_lateRG2	10XE25	F_earlyRG
E25_GTCACAAAGATCGATA-1	-341.427	F_IPC1	10XE25	F_IPC
E25_GTCACAAAGGTACTCT-1	-245.851	F_lateRG2	10XE25	F_earlyRG
E25_GTCACAACAACACCCG-1	-197.99	F_lateRG2	10XE25	F_earlyRG
E25_GTCACAACACGGACAA-1	-221.073	F_IPC3	10XE25	F_earlyRG
E25_GTCACAACATTAACCG-1	-207.191	F_lateRG2	10XE25	F_earlyRG
E25_GTCACAAGTCACAAGG-1	-245.404	F_IPC2	10XE25	F_earlyRG
E25_GTCACAAGTGCAACTT-1	-227.961	F_lateRG2	10XE25	F_earlyRG
E25_GTCACAAGTTACGACT-1	-238.032	F_IPC2	10XE25	F_earlyRG
E25_GTCACAAGTTCGTCTC-1	-100.74	F_IPC2	10XE25	F_earlyRG
E25_GTCACGGAGATCCGAG-1	-173.925	F_IPC3	10XE25	F_earlyRG
E25_GTCACGGAGGCTAGAC-1	-199.717	F_IPC2	10XE25	F_earlyRG
E25_GTCACGGGTAGAAGGA-1	-229.146	F_lateRG2	10XE25	F_earlyRG
E25_GTCACGGTCACGAAGG-1	-253.069	F_lateRG2	10XE25	F_earlyRG
E25_GTCATTTAGAAGGTGA-1	-189.507	F_IPC3	10XE25	F_earlyRG
E25_GTCATTTAGTTCGCGC-1	-189.383	F_IPC3	10XE25	F_earlyRG
E25_GTCATTTCACGCTTTC-1	-214.756	F_IPC2	10XE25	F_earlyRG
E25_GTCATTTCATGACATC-1	-160.819	F_IPC2	10XE25	F_earlyRG
E25_GTCATTTGTAAGTAGT-1	-188.024	F_IPC2	10XE25	F_earlyRG
E25_GTCATTTGTTTAGCTG-1	-200.231	F_lateRG2	10XE25	F_earlyRG
E25_GTCATTTTCAAAGACA-1	-242.86	F_lateRG2	10XE25	F_earlyRG
E25_GTCATTTTCGCTAGCG-1	-238.153	F_lateRG2	10XE25	F_earlyRG
E25_GTCATTTTCGGGAGTA-1	-324.786	F_earlyRG3	10XE25	F_IPC
E25_GTCATTTTCTACGAGT-1	-229.889	F_lateRG2	10XE25	F_earlyRG
E25_GTCCTCAGTGGTAACG-1	-201.036	F_lateRG2	10XE25	F_earlyRG
E25_GTCCTCATCAAGGTAA-1	-177.652	F_lateRG2	10XE25	F_earlyRG
E25_GTCGGGTAGGAGCGTT-1	-347.664	F_lateRG2	10XE25	F_earlyRG
E25_GTCGGGTAGTACATGA-1	-297.774	F_lateRG2	10XE25	F_earlyRG
E25_GTCGGGTAGTACGCGA-1	-311.581	F_IPC2	10XE25	F_earlyRG
E25_GTCGGGTCACAAGTAA-1	-284.08	F_IPC3	10XE25	F_earlyRG
E25_GTCGGGTGTCCGAAGA-1	-238.989	F_IPC3	10XE25	F_earlyRG
E25_GTCGGGTTCTATCCCG-1	-262.595	F_lateRG2	10XE25	F_earlyRG
E25_GTCGTAACATCCCACT-1	-185.82	F_IPC3	10XE25	F_earlyRG
E25_GTCGTAAGTTACTGAC-1	-265.495	F_IPC3	10XE25	F_earlyRG
E25_GTCGTAAGTTCACGGC-1	-172.383	F_IPC2	10XE25	F_earlyRG
E25_GTCTCGTCAGGTCTCG-1	-289.031	F_IPC3	10XE25	F_earlyRG
E25_GTCTCGTGTGTCCTCT-1	-307.267	F_earlyRG3	10XE25	F_IPC
E25_GTCTCGTGTTCCGTCT-1	-244.318	F_lateRG2	10XE25	F_earlyRG
E25_GTCTTCGGTAGCGTAG-1	-190.357	F_IPC2	10XE25	F_earlyRG
E25_GTCTTCGGTGGTCTCG-1	-288.738	F_lateRG2	10XE25	F_earlyRG
E25_GTCTTCGTCGTCCGTT-1	-172.321	F_IPC3	10XE25	F_earlyRG
E25_GTGAAGGAGCCAGTTT-1	-240.428	F_lateRG2	10XE25	F_earlyRG
E25_GTGAAGGAGGGCATGT-1	-118.122	F_IPC2	10XE25	F_earlyRG
E25_GTGAAGGGTCAAAGAT-1	-241.803	F_lateRG2	10XE25	F_earlyRG
E25_GTGAAGGGTTGGTAAA-1	-245.85	F_lateRG2	10XE25	F_earlyRG
E25_GTGAAGGGTTTAGGAA-1	-236.513	F_lateRG2	10XE25	F_earlyRG
E25_GTGAAGGTCTTCAACT-1	-234.389	F_lateRG2	10XE25	F_earlyRG
E25_GTGCAGCAGCACAGGT-1	-195.79	F_lateRG2	10XE25	F_earlyRG
E25_GTGCAGCCATGCATGT-1	-210.13	F_IPC3	10XE25	F_earlyRG
E25_GTGCAGCGTAGGCTGA-1	-252.278	F_lateRG2	10XE25	F_earlyRG
E25_GTGCAGCGTCATCGGC-1	-234.427	F_lateRG2	10XE25	F_earlyRG
E25_GTGCATAAGACAGAGA-1	-330.75	F_lateRG2	10XE25	F_earlyRG
E25_GTGCATAAGTAGATGT-1	-205.454	F_IPC3	10XE25	F_earlyRG
E25_GTGCATACAAGCTGAG-1	-211.859	F_IPC2	10XE25	F_earlyRG
E25_GTGCATAGTAGCTTGT-1	-213.589	F_IPC2	10XE25	F_earlyRG
E25_GTGCATAGTATCTGCA-1	-111.049	F_IPC2	10XE25	F_earlyRG
E25_GTGCATAGTCTCTTTA-1	-226.749	F_lateRG2	10XE25	F_earlyRG
E25_GTGCATAGTGAACCTT-1	-280.766	F_lateRG2	10XE25	F_earlyRG
E25_GTGCATAGTTACGCGC-1	-237.796	F_lateRG2	10XE25	F_earlyRG
E25_GTGCATATCAACACCA-1	-145.149	F_IPC2	10XE25	F_earlyRG
E25_GTGCATATCTAACTGG-1	-246.665	F_lateRG2	10XE25	F_earlyRG
E25_GTGCGGTAGACTACAA-1	-227.419	F_lateRG2	10XE25	F_earlyRG
E25_GTGCGGTCACCTGGTG-1	-330.647	F_IPC1	10XE25	F_IPC
E25_GTGCGGTCAGCCTATA-1	-332.268	F_earlyRG3	10XE25	F_IPC
E25_GTGCGGTCATGCGCAC-1	-281.835	F_lateRG2	10XE25	F_earlyRG
E25_GTGCGGTGTAGCCTAT-1	-232.954	F_IPC3	10XE25	F_earlyRG
E25_GTGCGGTGTTTGTTTC-1	-194.376	F_lateRG2	10XE25	F_earlyRG
E25_GTGCGGTTCGACCAGC-1	-167.98	F_IPC3	10XE25	F_earlyRG
E25_GTGCGGTTCGCACTCT-1	-223.812	F_lateRG2	10XE25	F_earlyRG
E25_GTGCTTCAGATGGCGT-1	-152.579	F_IPC3	10XE25	F_earlyRG
E25_GTGCTTCGTATAGGGC-1	-212.007	F_lateRG2	10XE25	F_earlyRG
E25_GTGCTTCGTCCAACTA-1	-228.899	F_IPC2	10XE25	F_earlyRG
E25_GTGCTTCGTCTAACGT-1	-178.515	F_IPC2	10XE25	F_earlyRG
E25_GTGCTTCTCAAGGCTT-1	-240.242	F_lateRG2	10XE25	F_earlyRG
E25_GTGCTTCTCGATCCCT-1	-277.279	F_lateRG2	10XE25	F_earlyRG
E25_GTGGGTCAGAAGGTGA-1	-346.048	F_IPC3	10XE25	F_earlyRG
E25_GTGGGTCCAACAACCT-1	-222.291	F_lateRG2	10XE25	F_earlyRG
E25_GTGTGCGAGACTAGGC-1	-224.808	F_IPC3	10XE25	F_earlyRG
E25_GTGTGCGAGGTGCTTT-1	-214.103	F_IPC3	10XE25	F_earlyRG
E25_GTGTGCGAGTGTACGG-1	-218.637	F_IPC2	10XE25	F_earlyRG
E25_GTGTGCGCAATTCCTT-1	-224.432	F_lateRG2	10XE25	F_earlyRG
E25_GTGTTAGAGATATACG-1	-230.389	F_lateRG2	10XE25	F_earlyRG
E25_GTGTTAGAGTAGTGCG-1	-235.778	F_IPC2	10XE25	F_earlyRG
E25_GTGTTAGCACTACAGT-1	-233.832	F_lateRG2	10XE25	F_earlyRG
E25_GTGTTAGCATACGCTA-1	-196.458	F_IPC3	10XE25	F_earlyRG
E25_GTGTTAGCATCGGGTC-1	-222.36	F_IPC2	10XE25	F_earlyRG
E25_GTGTTAGGTAAGAGGA-1	-179.443	F_lateRG2	10XE25	F_earlyRG
E25_GTGTTAGTCTTAGCCC-1	-125.491	F_IPC2	10XE25	F_earlyRG
E25_GTTAAGCAGATGGGTC-1	-198.353	F_IPC2	10XE25	F_earlyRG
E25_GTTAAGCAGTCCCACG-1	-158.869	F_IPC2	10XE25	F_earlyRG
E25_GTTAAGCCACCGAAAG-1	-217.853	F_IPC3	10XE25	F_earlyRG
E25_GTTAAGCGTGTCTGAT-1	-231.245	F_IPC2	10XE25	F_earlyRG
E25_GTTAAGCTCACTTATC-1	-154.976	F_IPC2	10XE25	F_earlyRG
E25_GTTAAGCTCAGAGCTT-1	-218.858	F_IPC3	10XE25	F_earlyRG
E25_GTTACAGAGTATCGAA-1	-190.801	F_lateRG2	10XE25	F_earlyRG
E25_GTTACAGAGTCTTGCA-1	-283.292	F_IPC2	10XE25	F_earlyRG
E25_GTTACAGAGTGTACCT-1	-260.283	F_lateRG2	10XE25	F_earlyRG
E25_GTTACAGCATCAGTCA-1	-241.579	F_lateRG2	10XE25	F_earlyRG
E25_GTTACAGGTCAAAGAT-1	-243.663	F_lateRG2	10XE25	F_earlyRG
E25_GTTACAGTCGCCCTTA-1	-252.954	F_lateRG2	10XE25	F_earlyRG
E25_GTTACAGTCTCGATGA-1	-331.476	F_lateRG2	10XE25	F_earlyRG
E25_GTTACAGTCTTCCTTC-1	-175.172	F_IPC2	10XE25	F_earlyRG
E25_GTTCATTCATCGGAAG-1	-249.23	F_lateRG2	10XE25	F_earlyRG
E25_GTTCATTGTAAGTTCC-1	-178.529	F_lateRG2	10XE25	F_earlyRG
E25_GTTCATTGTACGACCC-1	-242.181	F_IPC3	10XE25	F_earlyRG
E25_GTTCATTGTCTCTTTA-1	-452.738	F_earlyRG2	10XE25	F_IPC
E25_GTTCATTTCCTTCAAT-1	-185.563	F_IPC2	10XE25	F_earlyRG
E25_GTTCATTTCGTCTGAA-1	-168.339	F_IPC3	10XE25	F_earlyRG
E25_GTTCGGGCAACGATCT-1	-113.425	F_IPC2	10XE25	F_earlyRG
E25_GTTCGGGCAAGCTGTT-1	-217.392	F_lateRG2	10XE25	F_earlyRG
E25_GTTCGGGGTAAGGATT-1	-201.898	F_IPC2	10XE25	F_earlyRG
E25_GTTCGGGTCCCAAGTA-1	-238.85	F_lateRG2	10XE25	F_earlyRG
E25_GTTCGGGTCTTTAGTC-1	-203.081	F_lateRG2	10XE25	F_earlyRG
E25_GTTCTCGAGACCACGA-1	-192.16	F_lateRG2	10XE25	F_earlyRG
E25_GTTCTCGAGCAATATG-1	-149.898	F_lateRG2	10XE25	F_earlyRG
E25_GTTCTCGAGCCAGGAT-1	-180.791	F_lateRG2	10XE25	F_earlyRG
E25_GTTCTCGAGCTAGTGG-1	-270.826	F_lateRG2	10XE25	F_earlyRG
E25_GTTCTCGCAATGGACG-1	-204.515	F_lateRG2	10XE25	F_earlyRG
E25_GTTCTCGGTTGTTTGG-1	-218.773	F_lateRG2	10XE25	F_earlyRG
E25_GTTTCTACATCCGCGA-1	-266.687	F_IPC2	10XE25	F_earlyRG
E25_TAAACCGAGGAGTTGC-1	-150.636	F_lateRG2	10XE25	F_earlyRG
E25_TAAACCGAGTTGCAGG-1	-225.328	F_lateRG2	10XE25	F_earlyRG
E25_TAAACCGGTTAGGGTG-1	-183.625	F_IPC3	10XE25	F_earlyRG
E25_TAAACCGTCAACGGGA-1	-220.132	F_lateRG2	10XE25	F_earlyRG
E25_TAAACCGTCGATCCCT-1	-263.87	F_lateRG2	10XE25	F_earlyRG
E25_TAAACCGTCGCCAGCA-1	-209.861	F_lateRG2	10XE25	F_earlyRG
E25_TAAACCGTCGCTGATA-1	-182.484	F_IPC2	10XE25	F_earlyRG
E25_TAAACCGTCTGCCCTA-1	-235.771	F_lateRG2	10XE25	F_earlyRG
E25_TAAGAGAAGACTAGGC-1	-214.83	F_lateRG2	10XE25	F_earlyRG
E25_TAAGAGAAGTGAACGC-1	-366.096	F_earlyRG3	10XE25	F_IPC
E25_TAAGAGACATGTCTCC-1	-231.814	F_IPC2	10XE25	F_earlyRG
E25_TAAGAGAGTCGCCATG-1	-199.967	F_IPC2	10XE25	F_earlyRG
E25_TAAGAGAGTCGGCACT-1	-213.577	F_lateRG2	10XE25	F_earlyRG
E25_TAAGAGAGTTCGTCTC-1	-207.621	F_IPC2	10XE25	F_earlyRG
E25_TAAGAGATCAGCACAT-1	-230.058	F_lateRG2	10XE25	F_earlyRG
E25_TAAGCGTAGAAGGACA-1	-209.059	F_lateRG2	10XE25	F_earlyRG
E25_TAAGCGTAGTCGATAA-1	-225.495	F_lateRG2	10XE25	F_earlyRG
E25_TAAGCGTAGTGTTGAA-1	-356.184	F_lateRG2	10XE25	F_earlyRG
E25_TAAGCGTCATATGCTG-1	-143.538	F_IPC2	10XE25	F_earlyRG
E25_TAAGCGTGTGACCAAG-1	-202.046	F_lateRG2	10XE25	F_earlyRG
E25_TAAGCGTGTGTGAATA-1	-258.525	F_IPC3	10XE25	F_earlyRG
E25_TAAGCGTGTGTTTGGT-1	-332.565	F_IPC1	10XE25	F_IPC
E25_TAAGCGTTCTATCCTA-1	-284.863	F_lateRG2	10XE25	F_earlyRG
E25_TAAGTGCAGCATCATC-1	-311.574	F_IPC2	10XE25	F_earlyRG
E25_TAAGTGCAGCTGTTCA-1	-258.612	F_lateRG2	10XE25	F_earlyRG
E25_TAAGTGCCAGAGCCAA-1	-182.413	F_IPC3	10XE25	F_earlyRG
E25_TAAGTGCCAGCTTCGG-1	-246.98	F_IPC3	10XE25	F_earlyRG
E25_TAAGTGCGTTTGGGCC-1	-215.346	F_lateRG2	10XE25	F_earlyRG
E25_TACACGACATCTCCCA-1	-168.374	F_IPC2	10XE25	F_earlyRG
E25_TACACGAGTCGCTTTC-1	-169.159	F_IPC2	10XE25	F_earlyRG
E25_TACACGATCGTACGGC-1	-236.542	F_IPC3	10XE25	F_earlyRG
E25_TACACGATCTATCCTA-1	-250.525	F_lateRG2	10XE25	F_earlyRG
E25_TACACGATCTGTCTCG-1	-234.728	F_lateRG2	10XE25	F_earlyRG
E25_TACAGTGCATGTCCTC-1	-251.795	F_lateRG2	10XE25	F_earlyRG
E25_TACAGTGTCCCTCAGT-1	-245.062	F_lateRG2	10XE25	F_earlyRG
E25_TACAGTGTCTGTCTAT-1	-200.612	F_lateRG2	10XE25	F_earlyRG
E25_TACCTATTCAAACCAC-1	-176.832	F_lateRG2	10XE25	F_earlyRG
E25_TACCTATTCACAGTAC-1	-247.932	F_IPC3	10XE25	F_earlyRG
E25_TACCTTACAATCCGAT-1	-215.646	F_IPC2	10XE25	F_earlyRG
E25_TACCTTACATGTCCTC-1	-206.216	F_lateRG2	10XE25	F_earlyRG
E25_TACCTTAGTTCGGGCT-1	-177.733	F_IPC2	10XE25	F_earlyRG
E25_TACCTTATCGCCATAA-1	-204.171	F_lateRG2	10XE25	F_earlyRG
E25_TACGGATAGGTTACCT-1	-340.204	F_lateRG2	10XE25	F_earlyRG
E25_TACGGATCATATACCG-1	-294.339	F_lateRG2	10XE25	F_earlyRG
E25_TACGGATGTGTTTGGT-1	-217.218	F_lateRG2	10XE25	F_earlyRG
E25_TACGGATGTTATGCGT-1	-147.928	F_IPC2	10XE25	F_earlyRG
E25_TACGGGCAGCAAATCA-1	-244.571	F_lateRG2	10XE25	F_earlyRG
E25_TACGGGCAGCTACCGC-1	-290.815	F_lateRG2	10XE25	F_earlyRG
E25_TACGGGCCATTGTGCA-1	-231.702	F_IPC2	10XE25	F_earlyRG
E25_TACGGGCGTTCGTTGA-1	-242.637	F_IPC3	10XE25	F_earlyRG
E25_TACGGGCTCCACTCCA-1	-201.281	F_lateRG2	10XE25	F_earlyRG
E25_TACGGTAAGCTACCTA-1	-234.643	F_lateRG2	10XE25	F_earlyRG
E25_TACGGTACACTGCCAG-1	-220.239	F_IPC3	10XE25	F_earlyRG
E25_TACGGTATCTTCCTTC-1	-196.498	F_IPC2	10XE25	F_earlyRG
E25_TACTCATAGCCAGAAC-1	-221.598	F_IPC3	10XE25	F_earlyRG
E25_TACTCATAGCTACCTA-1	-174.338	F_IPC3	10XE25	F_earlyRG
E25_TACTCATAGGGATACC-1	-220.683	F_lateRG2	10XE25	F_earlyRG
E25_TACTCATAGTGAAGAG-1	-256.418	F_IPC3	10XE25	F_earlyRG
E25_TACTCATCAAGAAGAG-1	-233.132	F_IPC2	10XE25	F_earlyRG
E25_TACTCATTCACGATGT-1	-162.164	F_lateRG2	10XE25	F_earlyRG
E25_TACTCATTCCAGTAGT-1	-167.173	F_IPC2	10XE25	F_earlyRG
E25_TACTCATTCGTGGTCG-1	-207.778	F_lateRG2	10XE25	F_earlyRG
E25_TACTCGCAGCGATAGC-1	-226.851	F_lateRG2	10XE25	F_earlyRG
E25_TACTCGCGTCGCCATG-1	-266.081	F_IPC3	10XE25	F_earlyRG
E25_TACTCGCTCTTGCCGT-1	-293.979	F_lateRG2	10XE25	F_earlyRG
E25_TACTTACAGATGTGTA-1	-211.705	F_lateRG2	10XE25	F_earlyRG
E25_TACTTACCAGGCTGAA-1	-271.595	F_lateRG2	10XE25	F_earlyRG
E25_TACTTACGTGGCGAAT-1	-197.16	F_lateRG2	10XE25	F_earlyRG
E25_TACTTGTCAGTAACGG-1	-228.44	F_lateRG2	10XE25	F_earlyRG
E25_TACTTGTTCATAGCAC-1	-184.693	F_lateRG2	10XE25	F_earlyRG
E25_TAGACCAAGTACGACG-1	-228.446	F_IPC3	10XE25	F_earlyRG
E25_TAGACCAGTTATCACG-1	-212.83	F_lateRG2	10XE25	F_earlyRG
E25_TAGACCAGTTCCACTC-1	-195.099	F_lateRG2	10XE25	F_earlyRG
E25_TAGACCATCAGTACGT-1	-221.796	F_IPC3	10XE25	F_earlyRG
E25_TAGACCATCCATGAGT-1	-220.266	F_IPC2	10XE25	F_earlyRG
E25_TAGACCATCTCCAACC-1	-208.558	F_IPC2	10XE25	F_earlyRG
E25_TAGAGCTAGATGTGGC-1	-335.172	F_lateRG2	10XE25	F_earlyRG
E25_TAGAGCTAGTCGCCGT-1	-176.352	F_IPC2	10XE25	F_earlyRG
E25_TAGAGCTCAACTTGAC-1	-206.924	F_lateRG2	10XE25	F_earlyRG
E25_TAGAGCTCAAGTTCTG-1	-250.127	F_IPC2	10XE25	F_earlyRG
E25_TAGAGCTCAGCCTTTC-1	-263.856	F_lateRG2	10XE25	F_earlyRG
E25_TAGAGCTGTATGCTTG-1	-243.435	F_IPC3	10XE25	F_earlyRG
E25_TAGAGCTTCGAACGGA-1	-240.466	F_IPC2	10XE25	F_earlyRG
E25_TAGAGCTTCGCATGGC-1	-222.728	F_lateRG2	10XE25	F_earlyRG
E25_TAGCCGGAGATGAGAG-1	-263.523	F_IPC2	10XE25	F_earlyRG
E25_TAGCCGGAGCTACCTA-1	-265.628	F_lateRG2	10XE25	F_earlyRG
E25_TAGCCGGAGGTGCTAG-1	-165.074	F_IPC2	10XE25	F_earlyRG
E25_TAGCCGGAGTGAAGTT-1	-210.638	F_IPC2	10XE25	F_earlyRG
E25_TAGCCGGCAAGTTGTC-1	-216.663	F_lateRG2	10XE25	F_earlyRG
E25_TAGCCGGGTTGCCTCT-1	-235.083	F_lateRG2	10XE25	F_earlyRG
E25_TAGCCGGTCCTTGGTC-1	-241.703	F_IPC2	10XE25	F_earlyRG
E25_TAGGCATAGACACGAC-1	-217.497	F_lateRG2	10XE25	F_earlyRG
E25_TAGGCATCATCTACGA-1	-277.732	F_lateRG2	10XE25	F_earlyRG
E25_TAGGCATGTACCGCTG-1	-252.389	F_lateRG2	10XE25	F_earlyRG
E25_TAGGCATGTATCAGTC-1	-186.449	F_IPC2	10XE25	F_earlyRG
E25_TAGGCATTCTTCTGGC-1	-264.773	F_lateRG2	10XE25	F_earlyRG
E25_TAGTGGTAGGAGTCTG-1	-201.289	F_lateRG2	10XE25	F_earlyRG
E25_TAGTGGTAGGCTACGA-1	-227.163	F_IPC3	10XE25	F_earlyRG
E25_TAGTGGTGTTACTGAC-1	-305.702	F_lateRG2	10XE25	F_earlyRG
E25_TAGTTGGAGATATACG-1	-171.36	F_IPC2	10XE25	F_earlyRG
E25_TAGTTGGAGGCTCTTA-1	-189.156	F_IPC2	10XE25	F_earlyRG
E25_TAGTTGGAGGTGCAAC-1	-220.766	F_lateRG2	10XE25	F_earlyRG
E25_TAGTTGGCAGCCTTTC-1	-217.109	F_lateRG2	10XE25	F_earlyRG
E25_TAGTTGGGTCTGCGGT-1	-245.036	F_IPC2	10XE25	F_earlyRG
E25_TAGTTGGTCTGCCCTA-1	-261.548	F_lateRG2	10XE25	F_earlyRG
E25_TATCAGGCACTAGTAC-1	-240.989	F_lateRG2	10XE25	F_earlyRG
E25_TATCAGGGTACCGGCT-1	-271.76	F_lateRG2	10XE25	F_earlyRG
E25_TATCAGGGTCGAATCT-1	-317.56	F_lateRG2	10XE25	F_earlyRG
E25_TATCAGGGTGTTGGGA-1	-189.238	F_IPC3	10XE25	F_earlyRG
E25_TATCAGGGTTGGTTTG-1	-165.773	F_IPC3	10XE25	F_earlyRG
E25_TATCAGGTCATCACCC-1	-214.757	F_lateRG2	10XE25	F_earlyRG
E25_TATCTCAAGCGTGTCC-1	-228.173	F_IPC3	10XE25	F_earlyRG
E25_TATCTCACAGAGCCAA-1	-222.815	F_IPC3	10XE25	F_earlyRG
E25_TATCTCACATACTACG-1	-347.85	F_lateRG2	10XE25	F_earlyRG
E25_TATCTCACATGGAATA-1	-151.104	F_IPC3	10XE25	F_earlyRG
E25_TATCTCATCGGAAATA-1	-237.13	F_IPC2	10XE25	F_earlyRG
E25_TATCTCATCTCGATGA-1	-353.38	F_lateRG2	10XE25	F_earlyRG
E25_TATGCCCCACTCAGGC-1	-180.034	F_IPC2	10XE25	F_earlyRG
E25_TATGCCCGTACAGCAG-1	-223.29	F_IPC2	10XE25	F_earlyRG
E25_TATGCCCGTTCCCGAG-1	-221.777	F_lateRG2	10XE25	F_earlyRG
E25_TATTACCCACGGCCAT-1	-137.344	F_lateRG2	10XE25	F_earlyRG
E25_TATTACCGTCCTCTTG-1	-164.607	F_lateRG2	10XE25	F_earlyRG
E25_TATTACCGTGCGGTAA-1	-236.826	F_lateRG2	10XE25	F_earlyRG
E25_TCAACGAAGCGTGAAC-1	-231.946	F_lateRG2	10XE25	F_earlyRG
E25_TCAACGAAGGCCCGTT-1	-303.447	F_earlyRG3	10XE25	F_IPC
E25_TCAACGACATGGGACA-1	-235.397	F_IPC2	10XE25	F_earlyRG
E25_TCAACGAGTCAGAATA-1	-272.24	F_lateRG2	10XE25	F_earlyRG
E25_TCAATCTAGGGTTCCC-1	-171.182	F_lateRG2	10XE25	F_earlyRG
E25_TCAATCTCAGACAAAT-1	-187.497	F_lateRG2	10XE25	F_earlyRG
E25_TCAATCTGTCACACGC-1	-224.847	F_lateRG2	10XE25	F_earlyRG
E25_TCAATCTTCATATCGG-1	-271.549	F_lateRG2	10XE25	F_earlyRG
E25_TCAATCTTCGGATGTT-1	-230.783	F_IPC3	10XE25	F_earlyRG
E25_TCACAAGAGGTAAACT-1	-255.176	F_lateRG2	10XE25	F_earlyRG
E25_TCACAAGCAAGACACG-1	-259.163	F_lateRG2	10XE25	F_earlyRG
E25_TCACAAGGTCTCGTTC-1	-224.743	F_lateRG2	10XE25	F_earlyRG
E25_TCACAAGGTTTGTTTC-1	-235.659	F_IPC2	10XE25	F_earlyRG
E25_TCACAAGTCTCCTATA-1	-255.186	F_lateRG2	10XE25	F_earlyRG
E25_TCACGAAAGGCATGGT-1	-217.363	F_IPC2	10XE25	F_earlyRG
E25_TCACGAAAGTGTCCCG-1	-281.939	F_lateRG2	10XE25	F_earlyRG
E25_TCACGAAAGTTAACGA-1	-213.643	F_lateRG2	10XE25	F_earlyRG
E25_TCACGAAGTATAAACG-1	-318.494	F_lateRG2	10XE25	F_earlyRG
E25_TCACGAATCATTATCC-1	-276.405	F_lateRG2	10XE25	F_earlyRG
E25_TCAGATGAGCCACCTG-1	-187.753	F_lateRG2	10XE25	F_earlyRG
E25_TCAGATGAGGCAGTCA-1	-145.595	F_IPC2	10XE25	F_earlyRG
E25_TCAGATGCAAGCTGTT-1	-385.308	F_earlyRG2	10XE25	F_IPC
E25_TCAGCAAAGACAAGCC-1	-199.727	F_lateRG2	10XE25	F_earlyRG
E25_TCAGCAAAGCCGGTAA-1	-260.223	F_lateRG2	10XE25	F_earlyRG
E25_TCAGCAACAGACTCGC-1	-228.162	F_lateRG2	10XE25	F_earlyRG
E25_TCAGCAAGTACTCGCG-1	-222.533	F_IPC2	10XE25	F_earlyRG
E25_TCAGCAAGTCCCTTGT-1	-201.427	F_IPC2	10XE25	F_earlyRG
E25_TCAGCAATCACAGTAC-1	-196.578	F_IPC2	10XE25	F_earlyRG
E25_TCAGCAATCGAGAACG-1	-251.656	F_IPC3	10XE25	F_earlyRG
E25_TCAGCTCAGATGTGTA-1	-268.5	F_lateRG2	10XE25	F_earlyRG
E25_TCAGCTCAGGACTGGT-1	-275.566	F_lateRG2	10XE25	F_earlyRG
E25_TCAGCTCCAACACCCG-1	-352.847	F_earlyRG3	10XE25	F_IPC
E25_TCAGCTCGTCTGCAAT-1	-209.989	F_IPC2	10XE25	F_earlyRG
E25_TCAGGATAGACGACGT-1	-256.619	F_lateRG2	10XE25	F_earlyRG
E25_TCAGGATAGCGATGAC-1	-204.263	F_IPC2	10XE25	F_earlyRG
E25_TCAGGATCAACGATGG-1	-147.76	F_IPC2	10XE25	F_earlyRG
[truncated: 13,701 more rows]
